# Supplementary material for: In Vivo Epigenetic CRISPR Screen Identifies Asf1a as an Immunotherapeutic Target in Kras -Mutant Lung Adenocarcinoma
Source: Oxford University Press journal article supplement (doi:10.1158/2159-8290.cd-19-0780), 2019-11-19
Supplement: 21598290cd190780-sup-225096_2_supp_5887954_q0mng2.pdf [file 21598290cd190780-sup-225096_2_supp_5887954_q0mng2.pdf]

Supplementary Fig. 9

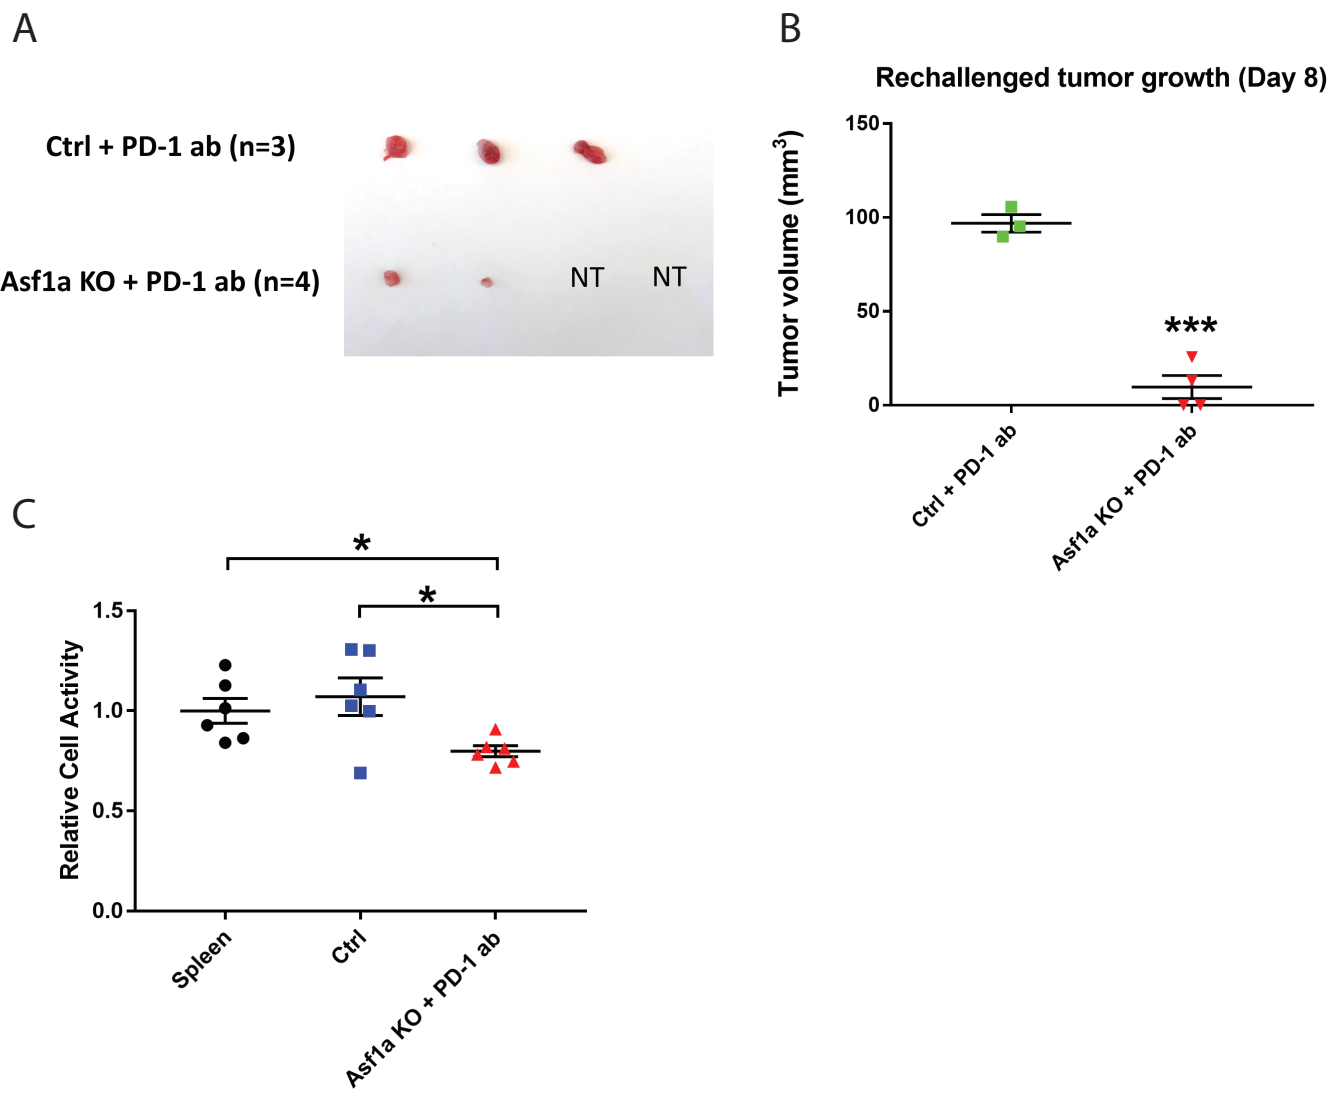

**Supplementary Figure 9. *Asf1a* KO and anti-PD-1 combination therapy primes and activates T cells that can recognize specific tumor-associated antigen. A, B, Re-challenge experiment shows the tumor formation capacity of MC38-Ctrl cells in MC38-Ctrl tumor-bearing mice or MC38-*Asf1a* KO tumor-bearing mice pretreated with PD-1 ab for 2 weeks. Re-challenged tumors were harvested 8 days after injection. Tumor images (A) and tumor volumes (B) from re-challenge experiments are shown. Ctrl + PD-1 ab, MC38-Ctrl tumor bearing mice pretreated with PD-1 ab; *Asf1a* KO + PD-1 ab, MC38-*Asf1a* KO tumor bearing mice pretreated with PD-1 ab. (Ctrl + PD-1 ab, n=3; *Asf1a* KO + PD-1 ab, n=4). C, *In vitro* tumor KP-Ctrl cell activity following co-culture with pan T cells isolated from spleens or lungs of KP-Ctrl plus vehicle pretreated mice or KP-*Asf1a* KO plus anti-PD-1 pretreated mice. Spleen, pan T cells isolated from spleens of KP-Ctrl tumor bearing mice; Ctrl, pan T cells isolated from lungs of KP-Ctrl tumor bearing mice pretreated with vehicle; *Asf1a* KO + PD-1 ab, pan T cells isolated from lungs of KP-*Asf1a* KO tumor bearing mice pretreated with anti-PD-1. (Spleen, n=6; Ctrl, n=6; *Asf1a* KO + PD-1 ab, n=6). All data are mean  $\pm$  SEM. \* $p < 0.05$ , \*\*\* $p < 0.001$**
