# Supplementary material for: In Vivo Epigenetic CRISPR Screen Identifies Asf1a as an Immunotherapeutic Target in Kras -Mutant Lung Adenocarcinoma
Source: Oxford University Press journal article supplement (doi:10.1158/2159-8290.cd-19-0780), 2019-11-19
Supplement: 21598290cd190780-sup-225096_2_supp_5888174_q0mty9.xlsx [file 21598290cd190780-sup-225096_2_supp_5888174_q0mty9.xlsx]

## Sheet: reads
Gene	Symbol	OligoSeq	Library	Input cell pools	ID-IgG												ID-PD1												IC-IgG												IC-PD1
					1	2	3	4	5	6	7	8	9	10	11	12	1	2	3	4	5	6	7	8	9	10	11	12	1	2	3	4	5	6	7	8	9	10	11	12	1	2	3	4	5	6	7	8	9
2410016O06Rik	KY001700	CCGAAGGCACCGGAAAAGTG	1709	157	0	0	0	0	0	0	0	0	0	0	0	0	0	28	13	0	0	4	1	2	139	2	4	8	0	0	3	19	0	0	0	0	0	1	0	0	519	0	0	0	3	0	1	0	3
2410016O06Rik	KY001701	AAGCCTTCTCGCCCACCGTG	5334	924	123	390	365	258	130	224	32070	27	144	77	692	480	210	63	46	824	15746	345	46	90	325	160	3	758	47	28	1785	656	48	14	453	48	552	1262	933	1336	15	3	2480	653	637	114	306	540	10
2410016O06Rik	KY001702	GGGCGCGCTGACACCGGCCG	2299	1363	160	1145	77	130	3066	25	42	75	1776	7801	52	36	2436	356	1018	275	142	25	18	411	5601	204	871	791	9	8	21	212	111	5	6	74	2449	781	14	1913	16	4	7	184	30	82	7262	5	4
2410016O06Rik	KY001703	GGCGAAGCCCGGGGTCGCCC	24	8	0	0	0	0	0	0	0	0	0	0	0	0	0	0	0	0	0	0	0	1	0	0	0	0	0	0	0	0	0	0	0	0	0	0	0	0	0	0	0	0	0	0	0	0	0
2410016O06Rik	MGLibA_00864	GACGCCGCGCGCTACGTCGA	4499	1001	58	25	269	290	557	41	337	173	885	142	60	444	100	351	2294	221	110	327	33	95	112	230	124	1153	149	4	35	202	372	7	14	24	25	516	18	16	80	255	5	9	9300	15	69	39	90
2410016O06Rik	MGLibA_00865	TCTGGCGCGTCTACCGACCG	4875	985	14	80	148	266	67	469	159	49	19	5	36	35	92	154	1430	59	131	22	211	20	254	19	90	100	1	4	37	0	6	757	25	6	31	7	4	130	399	14	5	2	38	4	2	32	183
2410016O06Rik	MGLibA_00866	CCGTCCATCGACGTAGCGCG	3462	958	38	236	52	115	41	43	223	69	13	39	222	164	468	164	16	78	47	49	25	28	579	30	34	45	835	8	108	9	63	35	15	1541	72	9	26	47	60	46	373	31	79	49	9	17	120
2410016O06Rik	MGLibB_00864	GCAGGACCGCAGCTACTACG	2564	612	3	8	906	34	3	4	35	0	4	0	612	0	1	1	5	0	3	4	14	2	4	1	119	572	0	2	6	1	1	1	1	3	0	1	17	1	16	2	6	0	1	11	1	1	24
2410016O06Rik	MGLibB_00865	CGCTACGAGGACGTGCAATT	3525	794	41	9	7	1846	439	8	3	541	15	115	753	1096	97	43	6	12	302	155	16	444	964	9183	3	17	13	18	9	67	8	87	1041	109	3	21	7	33	1	20	47	6	26	68	360	2	2
2410016O06Rik	MGLibB_00866	GCTCGCACGCGGATGAGCCG	693	326	174	83	109	24	67	606	92	41	183	159	14	60	16	138	1409	67	166	159	4	372	91	31	458	205	56	24	238	3	581	18	195	24	226	250	17	110	22	57	10	7	40	98	1791	27	33
2610002M06Rik	KY001812	GTTCAAACTGCAGTAACAAT	2274	745	11261	885	415	423	78	89	290	30	174	2569	241	421	16	187	12	10	374	37	45	23	125	871	63	2315	36	792	349	186	19	139	9	296	309	132	487	128	23	4009	177	235	3138	570	198	35	50
2610002M06Rik	KY001813	TTTCTTGAGAATGAGTGCTA	1672	345	54	9	19	26	12	58	3	16	118	687	349	9	76	3	18	1299	58	4	1	9	36	6	28	25	55	0	27	6	3	2	36	5	2	4	12	5716	0	1	0	1	150	4	2	54	2
2610002M06Rik	MGLibA_00909	AGATTTAACTACACCTGCCA	2213	578	1450	1114	53	505	1079	809	105	296	738	45	452	627	1387	1980	281	110	665	249	646	1782	232	8	6	192	8505	433	1475	965	4194	12064	273	124	14406	538	25152	359	972	11183	14970	1338	917	751	161	14	77
2610002M06Rik	MGLibA_00910	CTCTTACCTGTGGTGTCGTA	4432	1024	4	31	2	4	473	247	5	9266	15	6	1	61	27	29	15	19	5	4	10	1	8	217	34	1	4	0	1	6	2	603	1	4	1	0	1	7	2	0	7	5	14	4	3	2	1
2610002M06Rik	MGLibA_00911	TACTACCCTTACGACACCAC	7413	2168	70	390	318	377	2072	210	2388	181	166	126	785	220	2348	239	161	149	63	1241	52	87	300	333	118	2357	77	190	90	48	11	76	16	39	527	41	81	85	29	37	33	26	137	18316	23	47	16
2610002M06Rik	MGLibB_00909	AATCTATGGATGCTACATTG	3408	1222	79	17	10	51	39	4	22	10	391	32	21	76	24	31	12	9	9	27	13	20	970	59	4	14	1	0	7	0	56	4	0	9	24	4	19	8	25	0	0	2	3	21	6	284	109
2610002M06Rik	MGLibB_00910	AGTTCAAACTGCAGTAACAA	1178	185	201	17	7	6	0	1	20	0	1	223	39	6	1	25	0	1	4	4	9	3	134	11	3	64	4	20	14	55	1	9	0	14	8	3	9	2	5	122	5	8	84	106	163	1	4
2610002M06Rik	MGLibB_00911	TTGCTGCAAAAGAACTTAAT	1535	666	19	281	392	37	2478	5	3	409	9	106	32	21	53	3	1308	21	1	17	5	47	2	15	7	4	0	3	9	7	473	12	6	35	188	0	0	1	254	17	31	3	2	278	29	9	12
4632428N05Rik	KY002218	GTACCTCAGCTCACGAGGCG	2882	609	23	31	812	99	248	157	492	5	103	1275	572	10	684	287	82	18	59	493	25	8	110	854	83	17	305	41	0	11	7	73	12	7	114	83	1330	30	339	18	0	8	13	7	3	4	22
4632428N05Rik	KY002219	ATGTGAAGTTGCGTATGGGC	2853	593	6	0	27	0	222	247	160	60	48	28	1	366	7	21	20	86	26	5	4	2	1	46	70	6	162	1	3	0	1	1	211	26	207	183	0	6	1	3	3	1	2	234	3	0	12
4632428N05Rik	KY002220	TGCAATGTGAAGTTGCGTAT	3670	1637	189	361	2066	1878	1382	1458	214	73	59	170	91	209	28	114	493	57	17	125	153	43	551	128	917	42	4	16	291	7	14	26	281	11	11	10	18	25	31	150	4	20	18	473	5	1	9
4632428N05Rik	KY002221	CTGCAATGTGAAGTTGCGTA	2723	729	17	70	612	38	39	327	7	8257	19	30	10	8	9	871	29	1	20	5	52	17	26	86	905	70	7	36	13	0	1	10	14	13	1	1	5	2	3	9	2	2	10	26	1	0	2
4632428N05Rik	KY002222	CCTTGGGGTCACATTGCGCA	4287	1792	66	359	29	30	269	4	28	18	103	19	17	40	46	33	52	3303	1504	60	19	77	352	38	115	36	0	12	12	603	1	1	3	33	54	8	4	12	10	424	4	9	10	20	15	2	1
4632428N05Rik	MGLibA_01107	ACGGTACTTACGGCGGTGAG	1743	549	18	5	2	56	2	28	23	66	57	23	15	27	530	74	9	36	33	3	12	60	19	8	82	0	7	1	5	6	3	3	1	0	6	0	0	6	271	41	3	1	38	3	0	32	10
4632428N05Rik	MGLibA_01108	CTACGGGTCCATGGAGCTAC	4018	1816	984	1636	5628	3434	183	7220	1389	274	2005	456	16667	1134	7899	772	297	30	283	3006	442	112	1983	387	649	323	59	379	2868	100	781	206	644	2705	1881	1438	5730	327	9	11	117	103	2155	60	74	669	897
4632428N05Rik	MGLibA_01109	ATGTGACCATCTACAAGACG	1728	515	7	183	11	2160	63	4	34	51	257	21	119	9	160	22	41	10	86	46	1	4	35	62	10	11	0	0	6	1	1377	11	0	1	15	1742	3	10	0	0	0	143	1	58	4	23	2521
4632428N05Rik	MGLibB_01107	CCTTACAGGCATCACGGCTG	3152	1126	51	1585	6	15	57	10	31	283	21	2408	80	131	9	11	452	1270	1005	17	415	83	1002	14	43	27	11	8	21	90	12	76	23	92	21	13	62	7936	34	51	0	21	9	137	26	27	10
4632428N05Rik	MGLibB_01108	CGGCGACATGGGTGTCCCCG	3263	961	212	258	117	882	51	49	210	68	114	510	70	98	49	335	803	54	199	272	17	285	111	236	122	616	43	53	274	21	1561	13	162	73	402	297	23	99	406	62	40	24	140	264	960	107	163
4632428N05Rik	MGLibB_01109	CTCATTAGACGCCATGCATG	4807	1404	34	36	618	146	21	141	17	66	1955	17	26	36	7	2	1115	235	168	894	11	12	229	541	72	51	24	31	1	0	4	53	16	974	6523	62	5	80	56	167	103	6	5	17	19	2	46
Aanat	KY004017	GCGTTTGAGATTGAGCGGGA	1350	175	0	0	0	0	10	0	3	0	0	0	3	5	1	0	0	4	0	1	2	7	2	2	12	1	0	0	0	0	0	3	5	0	0	0	0	0	0	0	0	0	0	1	1	3	0
Aanat	KY004021	CTTCATCATTGGCTCGCTGT	3919	675	248	39	91	248	31	13	189	445	32	26	10	11	156	1403	21	1597	7	32	16	2	35	234	33	316	115	447	33	30	2	46	5	204	22	12	3	8	4	181	1381	138	2979	15	99	803	1
Aanat	MGLibA_02217	GATGCCACGCCTTCCTGCGC	6362	2232	1377	1293	128	228	623	226	143	236	254	2573	197	148	392	786	298	171	145	1972	1435	243	911	105	129	229	53	29	68	41	44	25	47	20	142	123	154	732	86	1223	41	22	671	161	142	4846	38
Aanat	MGLibA_02218	CCGCTCAATCTCAAACGCAC	1930	418	0	2	0	9	70	5	25	7	10	11	0	14	109	3	56	2	5	9	2	6	21	6	0	9	2	1	0	0	0	2	0	398	2	2	1	9	0	1	0	3	3	1	2	1	3
Aanat	MGLibA_02219	TGTGCACCGCCAGTACGTGC	8232	2335	430	306	536	321	187	336	211	54	107	546	514	494	48	583	70	143	307	28	84	116	504	2561	74	331	13	7	40	66	36	368	62	17	234	60	13	227	359	479	11	231	93	51	19	20	55
Aanat	MGLibB_02217	CCAGTGCGTTTGAGATTGAG	4164	1277	57	359	515	2669	166	65	423	49	207	49	259	91	142	285	145	102	107	104	60	259	379	1375	231	1029	140	19	624	62	22	58	8	353	100	10	8	19	133	26	83	5	19	18	492	57	51
Aanat	MGLibB_02218	CCCTCTACTTGGATGAGATC	2144	726	9	1	2	29	21	3	4	14	8	9	0	1	18	4	11	12	0	22	9	15	6	21	5	6	0	0	1	2	3	1	0	8	2	3	3	248	11	0	61	53	20	4	7	54	36
Aanat	MGLibB_02219	CCTTCATCATTGGCTCGCTG	4954	1253	466	501	555	172	883	256	230	40	304	1101	418	27	1727	5858	384	70	86	2970	33	42	1715	488	457	133	21	17	98	478	14	7097	36	115	23	5	62	171	1070	96	85	49	1449	43	19	52	49
Ado	KY005608	ATGCCCGGGTGGTCGTGCAG	3777	827	181	41	10	31	104	4	151	26	16	61	575	342	283	149	80	1233	119	52	62	12	72	79	42	98	63	126	12	6	92	2	64	203	24	10	210	97	69	44	24	241	66	75	6	13	3
Ado	KY005609	ATGTGCATGTAGGTGACCGG	3289	639	25	21	44	539	49	775	32	54	88	15	866	21	786	573	39	16	9	22	1333	34	21	94	6	59	5	3	18	24	3	32	5	48	10	341	0	17	39	26	6	4	11	115	3	56	282
Ado	KY005610	GGTGACCGGCGGGAGGTTGC	2838	769	2	44	257	3	34	66	6	6	63	122	27	71	10	56	7	66	28	7	56	4	24	28	920	7	194	14	14	6	1	22	87	115	17	5	0	11	43	4	614	2	4	320	23	1	58
Ado	KY005611	GGCTGCGGCAGCGCCTTGCG	3585	1612	1025	819	754	38	110	66	520	581	747	1431	3762	2561	1530	650	388	170	300	360	377	26	716	130	2201	591	1339	21	60	414	1017	17	155	24	337	66	63	17	36	107	20	28	30	11	28	8	234
Ado	MGLibA_03243	CCTCAACATCGCGCCGCGCA	5369	2733	276	823	5429	32291	1935	981	1408	2230	1504	3295	9641	7794	1452	5452	6202	2026	1708	5123	4397	5958	1287	2848	3167	2431	1965	8029	1195	784	1333	6232	228	1769	3198	4778	411	478	538	549	363	186	649	383	9610	1496	22243
Ado	MGLibA_03244	AAGCATGCCCCGCGACAACA	2770	642	3	35	1	16	1	937	4	6	13	0	9	21	4	12	2	10	37	1	3	0	11	0	1	77	0	5	25	0	4	1	180	14	8	85	1	2	0	72	0	0	8	19	3	0	19
Ado	MGLibA_03245	ACGCCTGGCGAGCGATGCGC	5786	1740	3955	4053	2104	19325	5506	2927	2359	584	21424	162	485	594	3853	236	69	1536	937	134	838	511	705	1069	2037	3177	10014	536	273	1667	1005	1189	710	221	488	72	418	16053	315	1997	120	294	3722	1132	648	657	892
Ado	MGLibB_03243	CCTTGCGCGGCGCGATGTTG	4166	2094	9240	21101	113	368	214	795	227	58	209	16529	354	98	667	57	2619	3002	84	286	4388	198	164	236	90	224	487	223	10321	588	48723	14737	349	11498	171	1206	89633	217	212	34	1806	12257	72	544	2906	571	741
Ado	MGLibB_03244	GCCCGTCGAGCTGCCGCGGA	5327	1678	15	5	10	795	83	70	27	9	196	18	11	17	26	59	6	204	8	16	93	12	26	12	38	4	12	2	2	1	0	3	1	846	120	674	281	99	151	22	25	4	32	21	2	3	1
Ado	MGLibB_03245	ACGCAGCACGCCCGGTCGCA	5461	1594	406	973	889	872	1806	419	1037	53	29	899	561	451	30483	2465	1607	77	10534	3130	25	353	63	7652	174	287	117	6	82	5045	35	60	53	144	14	280	16	9	74	58	7190	342	38	177	13	88	18
Adora1	KY005613	GGGCTCCCCAACACTGCCGT	3636	1377	23	53	29	95	149	363	92	82	24	100	14	87	30	629	408	831	455	25	30	47	106	73	148	107	56	14	84	13	8	0	149	75	15	6	14	44	1365	5	16	11	56	10	7	7	17
Adora1	KY005614	GACAGTGGTGACTCAGCGGC	1903	629	8	14	7	63	14	200	180	39	16	101	187	47	114	4	1936	0	4	299	6	2	6	30	1	216	121	2	9	1381	5	30	0	4	13	11	5	10	2	2	15	345	3	15	1	0	1
Adora1	KY005615	TGCTATGAACTCACCGGAGA	1594	442	34	18	3	273	3	2011	84	18	10	10	19	8	46	48	25	10	6	59	1	44	35	577	935	6	11	2	144	30	86	10	0	129	3	26	205	7	586	1	5	11	271	62	5	1	0
Adora1	KY005616	ATCCCTGGCGGTAGCTGATG	4598	1301	49	117	1976	531	64	508	139	59	77	33	3638	223	65	140	149	3547	155	161	246	176	1230	37	886	1655	67	6	114	574	4	15	5	16	9	3	16	5	36	18	6	6	327	14	71	8	7
Adora1	KY005617	CTGCTTCATCGTATCCCTGG	6115	2233	229	367	308	88	324	196	25	102	40	130	1011	50	717	97	914	91	39	164	42	349	156	140	926	330	5	12	138	12	19	122	175	12	77	59	12	142	13	23	109	49	19	59	88	3	80
Adora1	MGLibA_03231	GCTCAAGATCGCCAAGTCGC	3100	782	43	615	9057	113	218	41	96	28	3	27	8	1	241	29	196	84	13	3	18	25	17	110	423	7	18	0	3	3	5	3	0	8	12	5	4	0	69	8	4	7	17	10	4	4	11
Adora1	MGLibA_03232	AACACTGCCGTTGGCTATCC	5060	2252	86	727	796	507	228	431	250	27	903	410	1788	887	170	417	600	263	1128	1400	688	79	868	1873	235	31	149	97	16	50	81	1250	1450	54	1082	109	2021	538	28	931	2254	3245	66	2198	872	303	70
Adora1	MGLibA_03233	CACCATGCCGCCGTACATCT	7643	1906	109	1911	239	2345	258	233	351	233	228	4695	41	119	741	35144	281	283	838	89	266	817	68	1091	553	2114	199	50	36	567	51	7269	136	506	89	603	19	155	1226	159	7427	4312	14853	2858	56	314	277
Adora1	MGLibB_03231	CTTCTGCTTCATCGTATCCC	8695	3251	398	553	1256	3047	618	1625	8059	851	1124	517	3529	2476	2807	1302	2306	4949	747	4465	966	596	542	3941	322	19038	268	608	9644	343	59	675	899	289	4650	81	153	297	986	530	275	802	518	356	39	85	632
Adora1	MGLibB_03232	TGATGTGGCTGTTGGCGCCC	7244	2713	7139	226	5408	281	75	116	163	11	1283	111	624	236	1434	19	569	117	4205	3498	67	142	1220	1319	49	578	131	35	3447	1254	41	88	51	8183	30	9	5386	447	192	38	270	35	246	149	15	43	56
Adora1	MGLibB_03233	AGGTAGCATCGCGAAGTGCC	2518	1161	61	665	27	276	10	87	64	39	23	20	120	175	623	41	49	226	44	153	81	22	54	13	72	333	20	6	47	948	85	23	9108	90	82	4664	257	48	4601	44	322	999	212	12	72	19	109
Adora2a	KY005618	GAACGTCACCAACTTCTTCG	3323	808	697	54	25	328	125	296	497	20	238	28	840	19	34	25	319	37	47	658	7	73	677	591	59	17	6	0	11	271	10	8	1	172	183	29	6	1	7	6	0	2	9	399	0	69	183
Adora2a	KY005619	CTTCGTGGTATCTCTGGCGG	3170	1087	28	289	279	273	572	75	150	98	1374	203	1353	414	33	93	369	399	114	377	1235	181	2130	231	243	897	29	3661	42	740	18	4786	974	370	99	31	7	100	252	808	8	15	658	130	66	38	19
Adora2a	KY005620	TGGCTTGGTGACGGGTATGA	3126	1242	100	259	2439	470	485	50	2342	724	546	94	249	1112	401	447	534	551	33	91	34	117	261	220	843	159	58	759	95	2	7	157	127	126	110	30	31	45	76	15	47	74	65	15	37	65	125
Adora2a	KY005621	GGGCATCATTGCGATTTGCT	2873	725	43	61	124	23	124	28	54	57	10	11	92	5	96	2243	5	16	117	55	5	21	9	10	51	16	8	565	0	2	3369	1	4	31	778	9	1	122	1	3	42	477	25	10	43	5150	4
Adora2a	KY005622	CTCCACAAAGACCTGCGGCG	1856	325	84	14	159	4	24	86	43	4	83	62	29	181	1	11	15	31	14	14	5	13	6	10	1	7	0	2	2	2	1	1	80	1	101	1	6	19	0	1	0	10	2	4	4	6	2
Adora2a	MGLibA_03234	TCTGGCGGCGGCTGACATCG	5033	1510	72	193	371	772	901	182	371	132	279	245	393	167	100	258	3736	505	97	476	19	205	322	371	144	1565	3437	43	139	596	58	152	37	55	274	414	59	54	128	120	257	199	1656	205	897	10	20
Adora2a	MGLibA_03235	TCGCCATCCGAATTCCACTC	6284	2430	272	1512	172	278	1276	4454	110	2451	1579	464	225	925	158	1227	6565	69	50	278	347	7868	419	4964	1008	312	251	76	254	492	39	35	576	136	1803	163	123	324	6161	321	44	545	554	112	386	44	1253
Adora2a	MGLibA_03236	AGCGAGTCCGCTCCCCTGGT	2764	1110	43	140	160	1092	266	8194	53	87	965	578	555	82	21	174	97	93	51	87	842	160	409	198	292	288	1587	80	336	2349	551	48	107	32	493	48	53	7	14	139	4	563	56	1179	18	8	14
Adora2a	MGLibB_03234	CGTGGTACCCATGAATTACA	2961	1098	117	185	196	80	86	22	196	16	11	7	16	100	109	74	17	517	35	39	28	9	30	31	115	266	17	9	2	25	6	12	203	5	150	1	16	52	0	0	0	6	14	174	28	3	61
Adora2a	MGLibB_03235	AGCACACAAGCACGTTACCC	3411	1024	22	88	285	104	11	33	57	26	8	247	23	148	1	35	49	26	31	767	45	5	37	32	6358	14	4	0	12	107	6	5	41	24	8	7	5	7	12	10	0	2	11	85	5	1	3
Adora2a	MGLibB_03236	TGTCGATGGCAATAGCCAAG	2328	1281	5	24	756	19	40	2	10	6	4	12	24	10	88	13	8	167	96	16	12	95	3	2	5	144	5	25	8	7	1	2	117	3	7	31	7	16	11	160	1	16	190	12	4	3	9
Adora2b	KY005623	CTTTCTGGTATCCCTGGCGA	3481	758	68	501	5730	77	4736	612	193	43	34	64	360	2312	8	305	822	11	62	865	614	116	12	218	12	94	163	1974	28360	241	62	73	101	208	35	39	3	1349	3	3505	3883	1108	5824	91	86	421	7
Adora2b	KY005624	GCGACGGCAGACGTGGCCGT	2097	725	28	219	154	122	301	7	90	73	109	41	255	90	56	47	39	30	28	37	71	63	51	338	96	613	6	12	1940	204	1363	13	8	1198	39	35	21	11	7	53	117	456	495	53	38	14	53
Adora2b	KY005626	GCACCAGCACGAAGCAGGCG	1966	684	362	180	5424	273	1535	304	4178	47	115	54	81	113	273	2473	4394	18	1753	121	369	3773	210	272	24305	469	23	1636	101	404	29	185	14	1279	331	99	232	1292	11684	573	1665	412	44	395	1152	44	93
Adora2b	MGLibA_03237	GACGCAAGACGCGCTGTACG	2568	571	0	45	14	106	2362	102	126	8	1373	167	25	24	326	20	66	6	117	61	15	49	518	16	49	145	30	6	0	0	38	10	3160	87	14	6	504	22	0	7	10	8540	8	5	47	3	12
Adora2b	MGLibA_03238	GGTGGCTGTCGACCGATATC	2889	1713	327	80	29	51	115	144	68	13	101	120	22	61	690	41	41	260	64	42	19	57	49	12	123	122	375	6	10	3	17	17	8	14	23	16	2	11	7	0	1	3	53	8	13	4	7
Adora2b	MGLibA_03239	TCACTGGGACACGAGCGAGA	1572	642	326	10	39	15	12	16	42	28	149	16	66	3	114	6	309	5	6	64	20	3893	34	7	8	3	35	5	16	5	2	594	6	3597	5	269	16	156	3	30	8746	659	1040	70	5962	66	1564
Adora2b	MGLibB_03237	CATTGGATTGACTCCGTTCC	5024	2645	299	4189	1376	1357	1528	489	213	1141	6312	713	407	1621	363	6424	2522	10454	343	193	158	1977	11990	1855	745	1863	424	263	12882	10318	59	253	1565	279	1416	115	1966	90	278	346	156	66	82	74	45	166	220
Adora2b	MGLibB_03238	TCACCTGAGCGGGACGCGAA	1341	329	66	86	51	20	199	88	42	42	5	69	5	5	4	9	315	108	66	22	12	1599	9	34	934	55	0	0	5	15	87	36	0	51	0	4	0	7	26	2	10	4	4	25	2	1	0
Adora2b	MGLibB_03239	ATCCCTGGCGACGGCAGACG	3271	943	293	668	18	244	18	15	882	67	446	19	21	150	976	132	367	337	50	188	23	33	70	71	107	63	29	1	6	0	21	5	0	7	4	1	76	4	36	26	0	13	4	7	121	21	16
Adora3	MGLibA_03240	CCCTAATAGCACCAACCGTG	2754	679	28	65	26	104	64	31	9	255	65	2	32	54	19	5	0	166	15	16	4	19	14	21	61	0	1	0	2	7	11	3	4	1	1	3	2	0	3	6	34	68	4	103	2	0	14
Adora3	MGLibA_03241	TTTGTGCCACTTCCGTTCCG	11184	4714	2194	2821	591	1729	2595	5023	684	1266	6446	2165	625	2770	1404	433	3073	420	5728	395	619	258	3899	7340	3141	1884	4934	14116	2429	138	1591	1311	24042	953	2787	128	5992	6689	4603	898	110	422	195	419	545	2609	11669
Adora3	MGLibA_03242	ACCAGATGTCGCAATGTGCC	3765	1259	1834	157	88	83	418	37	174	290	1376	41	152	51	1432	490	140	4241	318	39	59	63	814	319	236	535	29	3	20	37	4	67	26	49	214	51	360	3017	30	174	478	30	135	27	23	34	26
Adora3	MGLibB_03240	CTTACCGGAAAAGAGAGCCA	1205	365	11	31	0	2	3	2	6	2	1	0	20	1	6	12	83	3	21	25	9	1	9	2303	4	15	2	0	0	0	0	1	2	18	5	1	0	0	5	6	1	2	0	2	3	2	0
Adora3	MGLibB_03241	CTTGGTGTGGTCCTTGTAGT	3775	1389	63	886	55	345	607	53	5669	118	41	262	210	59	3928	49	209	33	1212	679	64	1628	438	231	97	250	31	200	2772	47	174	154	65	16	5	1007	64	591	9384	5972	1672	1413	460	50	45	1144	85040
Adora3	MGLibB_03242	CTTTGGAAGCCCTACAGCTC	1513	483	0	0	9	2	9	7	22	0	5	2	0	29	0	0	5	4	5	0	2	0	2	8	4	7	0	0	0	5	4	4	0	0	0	0	0	0	1	2	0	3	2	3	4	1	9
Aire	KY006233	CCTAACTCACCGTTTCCAAG	2334	490	22	38	49	25	58	14	3	121	88	17	120	374	35	437	78	23	63	3	19	141	39	10	2	256	11	0	15	49	133	228	13	223	78	16	25	55	76	2	23	20	64	65	29	0	46
Aire	KY006234	TCCCTTTCCGGGACTGGTTT	1652	331	1	58	0	3	5	3	4	5	11	5	15	5	31	2	1	0	19	3	4	2	0	29	160	651	1	31	29	0	1	0	2	0	0	2	0	0	1	5	0	0	15	1	0	1	7
Aire	KY006235	CCTTGCTGGTCCCAAGGCCG	2122	303	7	0	6	0	0	1	16	0	2	28	7	2	3	0	0	3	5	0	5	2	22	3	1	37	0	0	0	1	0	0	1	0	0	0	0	4	2	0	0	1	0	1	0	0	8
Aire	MGLibA_03564	GGATCCCTTCCACGGCCCCT	2180	813	7	195	34	110	3	60	175	636	23	58	1	37	59	95	23	60	6	14	110	6	46	26	257	229	3	17	7	8	0	9	15	2	5	3	97	5	0	1	0	41	3	0	1	4	68
Aire	MGLibA_03565	GCAGGAGACGCTCCGTCTGA	2944	866	53	12	89	10	15	7	8	8	28	29	3	3	13	6	45	9	3	9	5	10	1179	30	12	17	0	0	0	1	5	5	15	2	0	8	19	5	20	6	1	6	0	2	5	0	2
Aire	MGLibA_03566	CCGGGACAGTGGGGCCATCC	4465	1476	18	124	32	36	47	43	158	22	23	112	674	69	994	61	22	2	17	6	37	38	24	62	73	14	32	6	9	0	494	11	7	4	6	1	3	12	38	2	0	57	14	17	5	7	9
Aire	MGLibB_03564	TCTTAGGGGGCTTAGTCTTC	3754	623	29	49	17	62	10	4	15	0	12	161	3	13	4	27	730	8	8	9	9	7	43	41	142	140	3	0	7	6	1	5	361	8	4	5	20	6	16	3	529	2	5	8	11	112	7
Aire	MGLibB_03565	GGAAGGGATCCTTATCCAGC	1026	68	0	0	0	0	0	0	0	1	0	0	2	0	0	0	0	0	0	0	0	0	0	0	0	1	0	0	0	0	163	0	0	0	0	0	0	0	0	0	0	0	0	1	0	0	0
Aire	MGLibB_03566	TGGGCTGGAGACGCTCTTTG	4868	1485	514	10163	1022	185	236	287	142	1026	466	333	2242	8560	2281	34	908	891	2859	4911	383	79	155	554	152	823	140	220	781	92	64	556	487	2157	3393	43857	63	496	103303	3139	24058	9520	1108	6072	113	12777	35
Akap1	KY006286	AACGCATCCTCGTCCTTAAC	2659	459	15	21	191	299	1	23	919	2	108	18	68	0	1	12	977	19	287	45	2	13	14	63	1922	36	28	4551	12	8	7	1	3	1	175	1	288	0	0	1	174	57	2	22	4	0	1
Akap1	KY006287	TCTCTCCAGAGGCCGCATAC	5795	1121	4	70	13	70	117	81	19	55	9	37	139	28	4	49	44	26	69	9	35	38	19	33	12	22	1	0	3	5	5	31	7	15	13	6	5	592	4	8	26	30	5	84	9	4	6
Akap1	KY006288	GGTTAAGGACGAGGATGCGT	1774	283	0	5	7	0	1	3	17	0	2	2	11	0	8	2	12	2	0	11	14	1	24	3	2	0	0	0	3	2	0	0	2	0	0	0	2	1	0	0	0	0	2	1	1	7	0
Akap1	KY006289	CAGAGATGAGATCGCCAAAG	1645	459	58	284	152	93	119	66	343	23	2	18	23	11	26	5548	546	614	5	22	5	40	18	0	28	31	1	0	4	5	1	383	2	1	1	276	18	11	2	7	0	34	10197	16	6	3	7
Akap1	KY006290	GGCCTTGCCGAGGACTCGCC	2759	657	933	60	6	6	6	806	23	21	8244	11	46	1	16	34	23	0	5	4	305	15	177	30	107	3	5	1	2	7	21	7	0	1	4	7	7	1	0	7	0	0	5	7	102	0	0
Akap1	MGLibA_03615	CAGTGGTGGCGCATAGATAT	3367	1089	202	579	1028	1153	180	65	260	1488	166	2933	158	524	2016	525	103	1713	167	555	185	1084	332	241	1919	258	801	6088	5146	323	25	189	164	524	434	92	14	652	106	993	81	17	87	881	1740	280	372
Akap1	MGLibA_03616	CACTTAGTTGGTCGACTGAT	3940	671	4	11	5	9	9	2	1	9	3	4	5	12	3	4	30	32	18	6	5	17	9	1	9	48	4	0	4	15	6	2	9	4	5	0	2	5	0	11	0	13	2	4	4	1	10
Akap1	MGLibA_03617	CGATAGCCCCCAGAGTGTCC	3873	626	5	6	7	19	43	3815	12	1	421	11	12	7	24	315	0	18	5	34	550	175	1324	59	11	10	5	0	48	4	1	0	0	4	2	3	4	0	1	1	0	1	0	10	20	0	77
Akap1	MGLibB_03615	ACTCTGGGGGCTATCGGGCT	2379	468	16	4	2	1	20	2	3	2	1	3	8	4	0	12	2	2	5	23	6	4	23	6	19	3	0	0	0	0	1	1	3	2	1	0	4	3	2	0	2	3	1	4	2	2	2
Akap1	MGLibB_03616	CTTCCTTGCCGATGACGTCT	6882	2338	940	385	938	1095	668	990	1098	3218	1466	427	1872	563	190	602	1034	157	219	675	1187	435	145	679	965	1032	221	30	319	266	79	183	22	603	153	85	65	174	158	129	203	65	218	264	266	20	53
Akap1	MGLibB_03617	CTTCCATGCACTGCGCAGTC	6749	3172	1438	6533	2312	10718	14751	2638	2406	27147	528	555	460	4821	2353	1240	2481	3176	2014	1789	2881	1055	3529	2244	908	7396	1076	481	6443	419	379	442	265	784	686	81	2118	1511	204	504	830	103	190	202	344	182	2111
Alg10b	KY006634	CAGGCGCAGCGGTACTGCGA	5610	179	0	0	1	0	0	0	0	0	0	0	0	19	0	4	1	0	2	1	1	0	0	1	0	0	0	0	0	0	0	2	0	3	2	0	0	0	2	0	0	0	0	3	1	0	2
Alg10b	KY006635	AGTACCGCTGCGCCTGCGGC	3510	404	7	26	9	30	8	6	486	4	0	2	20	7	5	6	31	13	9	360	13	34	19	1934	8	42	66	5	15	9	0	2	2	41	9	0	1	128	2	20	5	0	45	7	6	3	5
Alg10b	KY006636	GGAGAGGCTTGCGCCCACGA	2029	297	0	4	11	9	60	229	36	9	6582	22	22	33	3	228	4	2514	2000	24	1019	26	69	144	913	4	52	7	1	16	67	815	12	2214	1851	4	13	337	33	1	0	6	38	965	24	12	50
Alg10b	KY006637	GAGAGGCTTGCGCCCACGAA	1398	386	4	30	11	57	186	41	158	0	37	28	373	53	132	170	142	28	75	12	44	7	178	126	45	30	5	0	4	2	6	0	29	0	49	4	3	106	8	10	1	0	46	54	2	7	15
Alg10b	KY006638	TCCGAGAGCGGTCCCTTCGT	7862	2007	32	187	27	290	56	88	79	100	444	145	168	72	473	168	38	155	29	90	55	12	135	121	592	172	2	6	17	5	7	59	12	21	52	3	53	14	649	11	1	2	5	54	37	32	178
Alg10b	MGLibA_03819	GTATCTGGTGTCGGTCGGTG	6721	557	12	12	1	11	6	5	9	18	7	11	34	67	64	20	18	10	7	0	11	97	1	4	66	1	13	2	1	1	2	0	0	1	5	83	1	2	0	1	2	1	0	5	6	1	43
Alg10b	MGLibA_03821	CATAGGACCTCGGCCTTGCT	2984	1071	255	909	223	457	92	628	20	77	441	186	278	175	51	737	479	1406	178	350	605	82	98	1764	159	67	173	15	1144	13	147	10	53	13	113	17	288	268	571	30	28	26	6	21	24	13	49
Alg10b	MGLibB_03819	TACGCTTCCAAACTAAGCTA	1562	170	0	0	0	0	0	0	0	0	0	0	0	0	0	0	0	0	1	2	1	0	0	3	0	0	0	0	0	0	1	1	0	0	0	1	0	0	22	0	0	0	0	0	0	2	0
Alg10b	MGLibB_03821	CTCCCGCAGAGCGCGGCTGA	2026	146	3	3	254	217	153	107	84	24	30	25	57	42	0	0	1	1	0	0	4	0	17	23	264	2	6	17	50	7	3	0	0	1	43	9	17	3	2	0	0	0	1	187	1	1	0
Alg13	KY006649	CTTGTCCTCCAAGTTGGTAG	3401	1007	142	118	195	519	43	93	44	245	58	142	218	167	155	98	44	45	25	46	14	124	451	27	915	266	6	29	408	1667	34	478	12	178	238	152	13	96	13	72	87	14	477	78	18	31	7
Alg13	KY006650	CAGTGCCTCTACCAACTTGG	2740	698	9	69	21	18	40	27	138	30	1982	112	17	23	72	341	309	2766	47	137	13	6	113	71	4	70	70	126	12	6	25	11	18	105	390	42	11	246	3076	219	22	1266	30	76	89	82	799
Alg13	KY006651	TGACTCAGTACGGAATGGTT	2446	698	124	288	831	4964	760	551	794	1159	3005	87	1449	475	229	672	546	522	91	100	200	403	103	1538	116	895	160	5	50	28	62	551	29	487	511	56	78	181	955	138	305	2383	258	1089	6	34	18
Alg13	KY006652	GTGAATGACTCAGTACGGAA	1296	266	7	0	0	0	1	209	4	0	0	3	59	3	30	0	0	4	7	4	0	4	6	18	0	4	0	1	0	0	0	0	1	0	0	0	0	0	0	0	0	0	2	0	1	0	0
Alg13	KY006653	TCTCAGATACTTTACCTGCG	5045	951	17	23	0	16	55	26	3	7	74	7657	15	14	26	19	303	54	13	18	8	4	13	37	53	14	2	8	0	0	23	1	2	0	6	4	13	1	1	8	3	2	45	40	5	5	13
Alg13	MGLibA_03828	GTTTCGACGAGCTCGTCGCA	2816	445	2	0	2	37	2	5	51	0	3	10	4	713	0	1	3	0	3	1	3	4	8	74	2	2	0	0	0	0	3	89	7	0	6	0	0	1	2	0	5	2	3	2	6	1	0
Alg13	MGLibA_03829	GGTCGCTAACGACTGCGTTC	2448	414	16	5	2	45	6	4	4	14	22	0	38	4	36	6	5	489	0	1	13	83	15	12	3	34	14	0	2	0	2	0	335	2	0	0	0	2	6	0	2	0	8	3	2	1	1
Alg13	MGLibA_03830	GGTTGTAACCCAGACTCTCG	1204	307	5	32	8	140	1	0	14	1	3	1	11	17	1	559	2	17	4	4	4	48	12	1	2	21	47	0	1	72	1	8	3	1	6	0	0	8	1	8	0	0	1	2	1	0	0
Alg13	MGLibB_03828	GATCTTGTCATTAGCCACGC	3835	763	19	61	21	12	428	1846	66	24	12	6	169	0	20	20	6	50	34	55	184	25	13	0	5	59	20	1457	4	36	6	4	88	44	36	4	35	5	26	6	0	853	799	21	7	7	4
Alg13	MGLibB_03829	TCCATTGACTGTAACAGCCC	4098	1402	2	41	34	43	22	9	5	5	105	33	9	4	15	134	5	242	5	7	6	35	14	24	13	11	62	2	1	2	5	0	27	4	17	2	0	1	1	82	15	15	112	3	13	7	9
Alg13	MGLibB_03830	GAACAATCATCAATTTGAAT	1004	124	2	0	0	0	0	3	0	0	0	0	5	0	0	0	13	2	1	0	0	13	1	2	0	120	0	0	0	0	0	0	0	0	0	0	0	0	0	0	0	0	2	0	0	0	0
Alkbh1	KY006694	AGTCTCTCTAGTAAACTTCG	1265	390	1203	0	72	6	6	0	9	0	5	2	0	10	0	6	0	6	0	23	2	21	10	0	2	89	0	0	17	12	1	0	0	8	13	3	1	0	0	2	4	0	2	25	2	1	3
Alkbh1	KY006695	TTTACTAGAGAGACTGCGTT	1934	209	0	47	5	12	9	9	2	0	248	24	20179	2	157	8	0	2	0	4	2	7	46	1	0	4	0	0	0	0	29	0	0	0	0	1	13	0	1	0	0	7	0	3	2	0	6
Alkbh1	KY006696	TGGAGGGCCTATGGACTCGA	3270	751	34	44	176	20	125	115	130	125	11	1666	12	38	149	83	18	18	308	49	3817	23	28	68	10	163	1	40	0	15	0	33	40	159	0	4	1	6	14	3	72	6	0	13	5	3	204
Alkbh1	KY006697	GAGCGTGATGCCGAGAGGGT	1170	496	3	139	17	11	73	2	28	34	10	126	6	17	7	85	10	8	28	9	22	2	65	41	39	14	22	10	4	2	1	0	3	4	1	0	19	5	4	16	7	0	7	2	0	8	4
Alkbh1	KY006698	CACTGAGCGTGATGCCGAGA	3214	481	2	16	14	6	22	2	15	1	14	16	18	23	0	28	19	2	10	3	2	13	20	21	106	6	3	0	5	3	0	0	6	0	0	0	0	2	13	0	0	2	1	1	51	118	26
Alkbh1	MGLibA_03855	TCACTGAGCGTGATGCCGAG	4196	885	1	7	11	14	16	76	29	7	19	51	264	4	373	56	21	6	19	45	257	16	5	51	11	2	0	0	3	9	8	0	2	29	8	5	8	1	1743	1377	3	3	7	17	4	11	5
Alkbh1	MGLibA_03856	AGTCTAGGCGATAGTAATTC	1550	318	7	10	13	1	3	3	0	3	2	1	7	2	118	2	5	99	2	4	5	13	2	7	1	3	0	0	2	0	1	0	16	0	0	0	2	0	1	0	0	0	1	0	2	0	1
Alkbh1	MGLibA_03857	CTATCGCCTAGACTCCACAC	2481	1117	70	224	87	132	279	159	274	19	382	52	273	124	343	221	268	94	75	115	36	49	110	154	62	90	1	1	28	292	21	55	477	7	391	5	16	6607	20	16	88	8	583	124	80	34	19
Alkbh1	MGLibB_03855	AGGATAGCCTTCGAGTCCAT	2204	240	0	0	0	0	4	0	0	0	0	0	7	13	0	0	1	0	0	1	3	1	0	3	1	2	0	0	0	0	0	0	2	0	1	2	0	0	2	0	0	5	0	2	1	1	63
Alkbh1	MGLibB_03856	CCTTACTGTCCCAGTTATAA	2397	732	38	276	14	154	136	275	31	112	47	135	20	22	22	13	87	579	116	10	14	149	31	395	20	36	7	8	1101	327	6	16	7	583	397	550	9	115	40	37	335	64	11	38	7	234	88
Alkbh1	MGLibB_03857	GTTTACTAGAGAGACTGCGT	1462	276	2	5	13	1	103	34	8	0	76	1	439	22	12	0	8	8	3	5	4	1	60	6	41	5	1	0	0	0	6	0	17	1	1	0	0	1	1	0	3	0	1	1	2	0	0
Alkbh2	KY006700	CGTGAGGCCAGCATCGCCAT	4699	1097	76	16	92	34	7	12	4100	27	29	71	10	87	16	19	35	24	25	35	6	7	24	51	12	323	1	0	7	7	0	0	2	6	1	14	0	4	5	1	1	2	139	8	4	11	12
Alkbh2	KY006701	GTTCTTCTACGCAGGTGCAC	2809	477	6	105	4	83	2	0	9	5	127	4	4	6	0	49	3	9	44	4	369	24	42	34	627	150	0	5	17	0	0	6	2	0	11	0	0	1	17	76	2	56	5	5	0	1	3
Alkbh2	KY006702	CTGCCTCGGCTTTGCCGAAT	3621	1222	0	21	29	16	4	43	31	13	7	6	116	38	125	18	24	14	17	8	7	12	25	84	84	72	11	0	1	35	9	0	8	10	3	0	19	2	1	10	38	5	5	9	3	4	7
Alkbh2	MGLibA_03858	TGGCGACACCTTCGCGCGGA	2264	634	231	189	215	1703	165	255	248	615	446	529	278	44	18	73	646	51	1008	511	149	81	159	1475	91	135	986	367	165	18	64	1892	71	1547	77	242	6	719	19	43	17	16	49	65	35	11	3
Alkbh2	MGLibA_03859	CGAAAAGTCAAGTTGACCCG	1331	347	3	0	0	8	1	25	1	0	0	0	0	0	0	16	108	2	3	13	279	0	0	3	246	10	1	0	0	0	1	3	6	2	0	0	0	0	1	2	1	0	0	2	1	1	8
Alkbh2	MGLibA_03860	TGTGATTACACCGTCCTATT	4297	1297	36	2581	360	58	390	145	77	68	72	1407	88	659	17	393	90	287	1465	273	42	87	7343	185	381	73	13	4	93	112	6	82	9	9	128	4	14	61	63	30	6	13	56	26	7	4	35
Alkbh2	MGLibB_03858	TGTTCGAGATCGAGTCTGCG	3794	961	119	269	45	56	167	8	130	56	33	24	164	1010	12	13	14	143	18	24	15	70	13	39	77	27	0	0	7	29	0	0	2	7	61	2	10	19	8753	31	5	1190	64	24	2	23	2
Alkbh2	MGLibB_03859	CATCTCTGTGCTCGCCGATG	5381	746	5	50	32	6	9	30	1	6	14	5	6	16	1	3	1	2	3	7	4	16	5	72	13	2	7	0	0	9	316	15	6	2	3	152	3	8	17	116	4	3	7	6	4	2	0
Alkbh2	MGLibB_03860	GACCAGAAAACGTGTACGTG	2125	399	7	16	123	5	0	1	0	1	3	10	2	12	3	57	12	31	1760	25	13	2	59	483	9	2	0	0	0	1	0	2	1	1	13	3	5	20	0	0	0	7	1	1	1	1	0
Alkbh3	KY006704	TTGTAACATACGTGAGGATT	2486	517	5	334	2	77	117	242	63	0	10	8	2	16	146	5	24	1	227	5	15	7	20	11	0	310	0	0	1	0	1	1	0	8	1024	3	41	0	0	34	2	0	1	46	2	4	11
Alkbh3	KY006705	GTGATTCTCGAGTAAGTGTA	1702	377	181	44	61	626	16	109	86	13	213	172	3	32	15	62	256	1667	45	62	290	499	147	201	21	30	16	5	38	5	102	26	4	13	77	149	74	23	24	25	2	28	55	18	784	8	584
Alkbh3	KY006706	TAGACACACCAGTAGGTGAC	2670	342	1	0	1	2	0	0	0	1	59	16	6	167	6	27	1	2	262	3	6	0	157	442	0	1	2	0	0	0	0	0	0	0	0	3	1	0	0	0	0	2	9	6	3	0	3
Alkbh3	KY006707	CCAGGCTGGCCCCGCGGTCT	4405	1246	88	21	731	96	945	24	22	14	56	16	16	80	8	318	13	10	236	211	9	33	35	104	6	0	0	3	4	87	1	7	272	8	1252	50	4	50	380	720	13	3	58	11	11	56	138
Alkbh3	MGLibA_03861	AGCCGTCTTTCCCAGACCGC	3152	738	2027	4056	32	60	389	1304	92	451	19195	133	363	34	775	210	5	806	26	127	3243	659	183	65	50	25	9745	147	312	874	15	43	7	146	55	7387	109	3147	16	59	16	104	8	24	14	320	32669
Alkbh3	MGLibA_03862	TTAAGGGTGTGCTTATATCC	3672	401	4	6	11	31	12	3	8	7	87	1	3	13	1	3	3	0	28	7	11	2	5	31	3	27	0	0	9	0	76	5	1	13	36	0	3	0	2	0	19	0	1	5	1	0	0
Alkbh3	MGLibA_03863	GCTTACTTACTCAATCACTC	3019	619	117	40	15	190	674	78	112	5	9	35	158	66	6	292	62	16	14	55	72	38	262	851	1328	1252	26	33	3682	5272	848	13	140	949	36	8	529	143	277	0	1	68	123	102	492	700	6
Alkbh3	MGLibB_03861	GCCCCGCGGTCTGGGAAAGA	1883	282	0	15	5	45	38	1816	33	8	11	4	26	2	41	21	20	23	14	14	8	58	28	67	4	1138	0	0	7	0	0	8	0	0	44	5	3	10	3	1	7	1	541	6	2	16	0
Alkbh3	MGLibB_03862	ACTTACCTAGACACACCAGT	2150	239	1	1	0	15	2	1	1	0	2	6	5	12	0	2	1	1	2	1	1	4	56	8	0	2	2	5	38	1	0	0	0	0	1	2	0	0	0	0	7	0	2	6	426	0	1
Alkbh3	MGLibB_03863	AGCTTTGTAAGGATGTCCCC	2766	553	15	581	1	1	4	11	9	52	65	5	86	4	10	1	859	27	42	75	5	0	15	24	4	4	4	2	0	52	1	1	0	6	0	1	0	0	0	1	24	1686	10	1	2	292	2
Angpt2	KY007075	GCACTGAGTCGTCGTAGTCG	4336	1369	42	568	48	143	96	93	1020	47	130	61	60	108	327	294	1432	3798	238	142	218	47	53	47	22	52	60	5	438	56	54	20	3	27	38	14	86	89	263	32	3	3	159	49	64	7	24
Angpt2	KY007076	ACTGAGTCGTCGTAGTCGAG	1609	358	8	437	95	123	27	3	4	8	1	2	5	1	189	8	80	3	8	4	8	2	17	26	4	13	0	0	5	0	0	0	0	0	0	1	0	2	0	1	0	1	3	3	3	0	0
Angpt2	KY007077	GGAGGAAGATCGGCAGCTGT	1727	381	4	2	0	14	6	81	9	0	61	3	15	6	0	22	2	1	2	4	6	2	36	1	12	77	0	0	0	7	0	17	0	0	3	0	11	0	1	2	0	1	1	2	100	0	1
Angpt2	KY007078	AGCTGTCGGTCTCCGGCAGC	2380	722	6	59	124	34	18	39	91	97	146	14	84	25	37	31	34	18	113	53	113	5	27	11	6	138	42	0	9	137	7	10	517	3	73	28	12	65	20	4	2	1	36	6	13	1	15
Angpt2	MGLibA_04131	ACGGATAGCAACCGAGCTCT	1516	633	0	3	18	2	30	4	33	11	9	18	0	0	79	10	0	1	7	4	0	15	34	6	54	78	0	0	0	16	0	0	59	0	2	0	0	5	1	0	0	2	1	0	4	1	0
Angpt2	MGLibA_04132	GCAGCTCGAGTCTTGTCGTC	4013	1257	15	19	92	482	429	2806	86	42	11	748	87	20	30	73	8	12	7	13	18	92	34	150	5	25	13	2049	1	52	18	7	109	5	295	2	6	6	25	7	1	1013	1173	3	17	5	0
Angpt2	MGLibA_04133	AAGGAGCGAGTTGTTGACCG	2246	562	182	223	119	47	213	104	32	212	31	14	347	37	31	3	76	11	518	26	169	89	32	4	89	18	0	6	499	6	118	2	5	4	19	46	287	19	38	4	11	1	63	500	24	24	4
Angpt2	MGLibB_04131	AGCTGTTGACGGTCTCCATT	4435	1615	181	666	6746	428	1088	8896	1452	5542	996	4469	545	8957	349	5696	440	260	4752	1552	132	13339	3026	2779	1055	154	464	82	508	3337	1409	154	360	988	2499	2303	1324	2516	261	554	262	288	1638	10067	548	5904	167
Angpt2	MGLibB_04132	CTAGCTGGAGAATTACATTC	1580	223	1	4	7	3	0	141	0	1	3	4	24	108	0	6	0	3	2	0	2	1	13	1	0	3	0	0	0	3	0	17	0	2	2	0	0	2	0	2	0	0	7	0	0	0	3
Angpt2	MGLibB_04133	GATTTCCGCACAGTCTCTGA	2863	586	31	92	3	32	24	1	86	0	378	10	4	13	313	4	2	1	3	8	10	4	11	22	47	68	0	4	0	2	0	0	1	5	19	4	2	2	6	20	2	39	4	35	1	12	106
Apc	KY007739	CCCGACTTCCGTAGGAGCGA	2047	7021	24346	62623	63234	53557	78820	22193	67246	24672	124242	37177	90653	66950	88806	30345	51001	57407	43192	26292	80952	26522	108510	49913	73120	49920	44191	83773	83216	27328	55681	54846	72959	19657	58715	46907	30074	17634	105152	128121	125860	49433	71106	60694	81040	35916	158254
Apc	KY007741	CCTACTATCATCATGTCGAT	3693	1173	123	122	515	543	401	1537	2375	315	1427	135	235	1323	687	95	707	338	152	174	95	276	354	375	100	121	23	81	51	371	80	100	449	1245	108	6	384	33	91	32	69	309	22	130	17	18	73
Apc	KY007742	GTACACCTGCTGAATACGAG	1812	405	41	579	108	72	66	157	155	233	212	58	84	68	442	19	345	2577	116	24	44	63	49	35	7	206	21	18	37	6	471	173	10	14	759	12	42	24	12	33	160	14	21	26	28	6	12
Apc	MGLibA_04599	GGATCTGTATCCAGCCGTTC	2787	530	50	30	11	292	1170	29	42	54	9	317	36	13	70	12	9	14	11	34	32	308	7	145	145	22	0	14	2	3	7	6	3	60	1	1	3	2	0	343	17	3	7	1	11	4	4
Apc	MGLibA_04600	GACTTACTAGAGCGTCTTAA	1957	767	4545	2978	3381	137	248	297	3014	3131	2870	594	21146	13670	6085	2677	1944	653	1108	1788	2040	102	2057	477	6819	2228	108	13	139	1482	4244	53	123	72	1300	161	417	123	124	262	1	3	73	51	3	10	664
Apc	MGLibA_04601	AGATCCTTCCCGACTTCCGT	5161	2517	1899	287	690	3993	559	369	1416	1168	3062	1510	6397	2095	2199	1648	1096	3417	5596	3331	846	468	1897	835	2832	4817	141	32	361	498	72	713	38	401	1699	971	49	112	905	138	987	265	197	3318	214	71	119
Apc	MGLibB_04599	GTGCACGCTTCTCCATGTCC	10878	3107	223	627	248	272	1089	1702	483	553	412	703	967	236	556	301	596	301	831	263	205	315	663	885	249	134	124	42	142	61	69	32	25	56	123	184	117	19	308	81	27	60	533	44	54	24	87
Apc	MGLibB_04601	GAAGATGAGACTATGACTTC	1792	519	3	11	80	44	55	4	115	1	152	21	32	5	1	54	131	10	69	11	109	51	14	46	240	11	2	0	6	1	7	0	42	7	46	1	15	0	7	1	25	1	41	6	1	4	24
Areg	KY008079	GGGAAAGGCGAATCGCTTTC	1408	450	4	83	6	11	11	8	7	29	3	5	28	40	564	10	18	91	30	492	9	25	34	8	7	13	8	0	1	18	7	2	1	10	11	48	1	23	0	0	0	1	22	8	4	1	18
Areg	KY008080	GGAAAGGCGAATCGCTTTCT	1905	759	3	44	19	37	179	8	21	1	20	1	8	134	18	56	21	91	7	13	7	16	12	26	13	56	4	0	5	4	5	0	4	19	8	3	0	6	3	7	0	1	3	5	2	0	1
Areg	KY008082	AGAAGGCATTTCGCTTATGG	2391	513	14	18	13	3	0	1	25	1	715	3	5	76	1	12	1	2	8	2	7	4	2	4	6	38	0	0	4	0	279	0	0	5	6	0	2	0	1	2	0	2	2	3	2	0	2
Areg	MGLibA_04830	GCCAGAAGGCATTTCGCTTA	3278	1515	860	463	377	34	518	29	6632	141	9092	50	1947	49	596	14	21	5288	214	102	105	218	746	40381	3158	751	463	10	20	2	21	3	14	840	6431	19	11	10	839	8	2504	19	260	31	5	45	268
Areg	MGLibA_04831	AGGGGACTACGACTACTCAG	1301	728	18	19	444	12	24	6	86	13	150	316	26	157	16	34	700	730	72	421	10	4	131	1	217	1142	1	1	1	4	0	52	3	22	16	7	2	23	38	1	221	1	20	5	7	2	10
Areg	MGLibA_04832	TGCCGATGCCAATAGCTGCG	4873	2369	170	3474	1045	885	908	366	962	353	4386	709	348	4341	194	1369	588	810	1006	417	152	5032	790	494	2186	578	2247	363	12099	214	94	125	227	470	304	321	81	166	415	694	27	320	188	240	190	143	138
Areg	MGLibB_04830	ATGCAGATACATCGAGAACC	1236	204	4	0	0	1	0	12	1	1	5	4	1	6	209	1487	0	2	2	7	1	3	194	0	108	2	0	3	0	0	2	1	1	0	3	5	0	6	0	3	0	2	0	2	1	0	1
Areg	MGLibB_04831	GCCATCATCCTCGCAGCTAT	4172	1442	23	73	83	20	753	78	5	1673	16	13	134	172	24	335	122	13	124	12	51	13	44	110	179	187	34	67	31	5037	11	14	90	19	284	6	511	7	5	255	107	1	28	14	31	67	5
Areg	MGLibB_04832	GCCTTTGGAAACGATACTTC	1615	485	6	17	3	8	9	27	21	1	111	1201	8	0	6	49	41	2	31	7	10	19	12	89	8	10	0	0	1	0	8	9	27	26	3	19	1	5	16	1	0	8	4	22	10	0	6
Arg1	KY008145	GAATAAACTTACTGTTCCCC	2195	522	11	75	0	24	27	5	41	7	4	22	17	0	8	28	0	46	50	1	7	1	8	2	5	5	41	0	1	0	0	84	0	60	0	2	24	20	3	3	3	0	0	2	12	4	3
Arg1	KY008146	GCCAAAGACATCGTGTACAT	2472	1003	41	539	440	124	378	781	1069	204	104	771	2731	359	460	279	456	94	2604	206	117	469	25	100	89	18	63	41	51	6	121	138	193	110	22	7	292	23	29	45	242	824	406	27	14	11	525
Arg1	KY008147	TTGGCTTTCCCCACAGACCG	3206	801	16	279	112	151	100	332	76	27	44	182	320	26	45	15	78	235	58	174	267	97	250	29	10	42	7	9	19	2	17	104	69	19	7	5	11	19	191	122	1183	64	35	18	124	8	2
Arg1	KY008148	TGTGAAGAACCCACGGTCTG	2616	744	2	0	38	7	169	5	12	18	5	12	16	1	11	69	10	4	83	4	26	10	17	6	0	133	65	3	227	1	3	215	4	7	3	36	1	102	7	8	0	14	251	290	47	194	1
Arg1	KY008149	GAGTATGACGTGAGAGACCA	1270	379	3	226	21	93	912	21	36	131	861	2	20	11	172	245	32	14	7	37	1781	11	169	565	49	27	1	19	12	2	8	1	0	2	1	0	4	46	35	4	3	11	3	2	7	0	4
Arg1	MGLibA_04878	CTTGCGAGACGTAGACCCTG	4403	1181	13780	1033	357	634	112	103	466	21	193	2840	101	906	142	227	49	188	407	215	46	61	75	706	812	2668	42	900	398	170	8	165	17	320	349	130	550	136	14	3558	157	4520	3599	615	194	41	46
Arg1	MGLibA_04879	AAGCATCTCTGGCCACGCCA	3394	1037	19	20	87	166	99	7	7	157	3	40	28	3	395	57	35	274	120	14	1048	17	398	23	52	21	12	17	2	5	31	25	3	14	19	126	27	8	2	4	2	7	97	189	6	4	10
Arg1	MGLibA_04880	GCCAATGTACACGATGTCTT	3383	798	6	26	28	7	8	2616	181	4	75	29	48	20	477	2539	24	11	11	8	35	271	146	25	1	13	3	1	22	0	23	7	0	48	2212	2	111	9	5	53	2823	354	5	24	3	15	39
Arg1	MGLibB_04878	CTGTTCTTCAGCCTCGAGGA	2479	986	40	376	3040	778	72	74	355	16	30	27	67	328	82	314	85	312	1341	13	30	158	42	792	305	56	27	9	6	3	5	1198	5	89	42	2	1	16	3	32	17	2	6	12	25	7	6
Arg1	MGLibB_04879	TGGGTTCTTCACAATTTGAA	1700	760	1	24	1	26	3	60	10	3	435	2	365	13	12	87	21	15	62	2	9	6	72	24	18	4	7	0	0	0	25	0	4	2	12	1	3	0	4	14	1	1	5	3	11	0	3
Arg1	MGLibB_04880	CATCCACCCAAATGACACAT	2781	1300	19	62	76	678	1362	26	749	24	303	114	7117	698	129	116	20	1622	197	1166	56	1148	77	24	61	138	7	29	516	6	11	11	48	26	27	4	136	23	159	9	3	7	13	1408	21	21	30
Arg2	KY008150	CCAGCTTCTCGAATGGCAGC	1960	661	6	15	479	55	3	1	16	14	4	8	24	158	34	86	5	176	32	6	6	58	11	8	51	0	4	3	4	0	19	9	37	0	1	1	9	0	246	7	3	2	78	8	2	0	4
Arg2	KY008151	GGTTGTGTATCCTCGTTCAG	2864	890	76	865	281	619	326	90	127	9	3057	103	43	330	1591	351	179	183	56	44	139	9	9	140	361	195	2	16	43	0	20	8	116	32	56	15	27	57	16	8	5	4	18	11	4	0	44
Arg2	KY008153	CTGGCAATAGGTACCATTAT	2986	1438	343	587	65	845	21	81	3564	32	89	93	481	413	1256	39	372	32	35	71	1058	46	113	97	11	630	1517	531	4156	1668	45	21	10	823	119	14	7	231	64	84	1169	165	91	725	85487	32	42
Arg2	KY008154	GTACCATTATCGGTCACGCC	2567	504	9	9	2	90	6	0	2	45	14	23	5	1	2	1	4	8	7	3	20	12	3	2	30	4	4	0	0	1	3	0	1	2	5	41	0	6	0	0	4	0	90	9	0	15	14
Arg2	MGLibA_04881	GTGCCGGGCGTGACCGATAA	2387	925	266	94	66	1208	916	616	150	453	11	1248	651	516	4669	181	202	15237	165	1363	4233	9525	6	58	5	99	3550	49	80	145	289	691	377	594	6950	7803	6598	155	95	238	0	396	20	357	26	664	529
Arg2	MGLibA_04882	CCCCCAAATATTGTGTACAT	3337	1395	12	82	103	53	35	37	82	25	176	25	50	13	20	104	368	15	30	46	61	58	1047	58	18	2759	1	0	2	4	38	18	42	4	21	11	12	10	1554	2	11	0	3	4	3	2	29
Arg2	MGLibA_04883	TTCAGTGGGCCTTGCCAACC	4325	1558	672	7458	829	4119	3607	4340	2205	784	1142	779	464	729	1370	4544	307	2079	13495	3857	9289	2836	9145	3442	2646	1211	70	2549	7036	658	64990	357	1464	335	2335	999	766	8503	822	408	193	72	19044	1295	346	85	132
Arg2	MGLibB_04881	TTGGCAAGGCCCACTGAACG	1677	727	12	16	65	6	75	4	141	13	50	7	15	13	103	16	28	8	55	5	6	10	5	9	16	32	0	1	10	0	0	6	1	4	3	2	6	5	6	1	0	4	1	127	28	1	114
Arg2	MGLibB_04882	CCAATGTACACAATATTTGG	2747	816	6	101	145	94	38	6	6	23	109	10	53	22	290	96	93	12	22	241	66	42	75	31	9	796	3	28	23	15	5	5	4	88	23	4	1	3	12	20	2	57	143	44	2411	12	24
Arg2	MGLibB_04883	CCAGCTGCCATTCGAGAAGC	2217	851	50	50	195	410	20	11	29	0	37	2	21	153	72	83	22	6	92	17	31	1	4	95	11	121	0	3	11	3	0	8	49	9	4	2	52	7	3	6	1	3	2	13	4	0	1
Arid1a	KY008440	GGACAGATGCACTCGGGCGT	2335	1099	157	143	72	34	570	59	108	39	147	430	79	74	54	298	1115	39	178	156	38	206	113	92	54	402	45	63	244	16	687	24	173	82	286	269	38	90	326	55	16	20	15	89	898	42	131
Arid1a	KY008441	CAGCAAGGCCCCAGTGCGTA	2505	469	29	190	28	2	11	46	5	60	7	340	0	16	2	9	98	4	0	23	52	11	5	1	0	1	4	4	13	2	4	0	2	2	8	0	2	3	0	2	0	0	8	8	1	1	3
Arid1a	KY008442	TCTCGGGGAGCTCAGCGCGT	4103	1506	18	11	1123	0	15	0	25	7	3	6	6	213	4	12	98	2	10	8	5	0	20	20	23	15	0	1	81	1	0	4	0	22	5	1	1	60	270	16	10	40	3	7	109	1	8
Arid1a	KY008443	TTGCCCGAAGCCGTAGGCTG	2802	609	264	455	565	699	1123	474	959	741	1244	1370	349	168	132	177	2300	155	201	555	325	639	245	1349	261	59	143	194	344	57	111	131	1031	325	557	63	139	201	411	29	54	84	138	197	136	70	101
Arid1a	KY008444	CAGGACGGGGGCGCGGGCAA	2971	1214	38	252	275	145	124	427	38	68	102	139	316	185	143	15	339	12	19	172	59	4	151	1995	8	443	0	9	92	17	15	7	1	15	0	0	3	427	6	1	0	13	8	21	3	1	14
Arid1a	MGLibA_05067	GCCCTGCTGGCCATACGCAC	3759	695	1	0	3	14	3	18	0	6	107	3	4	11	23	2	52	253	2	7	5	16	2	5	0	12	0	1	0	2	3	0	3	3	2	1	1	5	43	34	2	0	6	2	31	7	11
Arid1a	MGLibA_05068	GGTCCCTGTTGTTGCGAGTA	2968	581	78	92	249	3183	29	184	501	126	75	134	116	800	1539	140	159	3110	38	340	25	41	1170	17	21	3414	44	166	411	227	155	543	456	4051	59	753	69	27	2875	402	487	5	7	6	15	24	6
Arid1a	MGLibA_05069	TAACCCATACTCGCAACAAC	2470	457	1	1	11	1	0	0	74	8	3	0	4	3	3	12	19	1	0	1	4	0	6	123	2	0	3	0	0	0	0	0	0	0	8	0	4	0	58	0	0	1	0	2	1	0	2
Arid1a	MGLibB_05067	AGTGTCGCGCAGTCTCGCTC	2812	675	3	35	64	47	0	0	53	16	40	10	37	5	2	137	3	9	1	9	2	5	20	2	35	29	5	5	16	0	87	1	0	5	3	4	1	10	2	13	0	4	4	1	2	1	0
Arid1a	MGLibB_05068	TGAGCGAGACTGCGCGACAC	2615	317	6	1	0	0	6	5	1	6	5	0	1	7	2	4	25	4	0	2	5	2	4	0	2	14	0	0	0	1	0	0	0	2	0	0	2	0	0	0	0	0	0	5	2	1	0
Arid1a	MGLibB_05069	CTGCTGCTGATACGAAGGCT	3436	925	4	4	1	20	14	67	89	5	6	140	3	20	85	107	22	187	5	254	14	27	1781	27	93	4	0	0	60	2	0	19	1	15	31	5	6	3	4	8	9	13	9	5	4	1	6
Arid1b	KY008445	CCCGCGCCGGTCGCCGTGCC	8917	3036	152	452	511	2010	316	275	242	966	329	503	231	174	1570	257	462	119	107	313	55	132	84	93	111	205	17	23	24	78	5	30	19	158	62	20	31	133	101	57	155	1168	123	25	32	146	94
Arid1b	KY008446	CGGCTATGGGAGCTCGTCCT	2408	643	1	13	3	26	60	56	3	1	0	9	0	6	5	15	7	3	3	2	4	2	4	13	388	7	0	2	1	1	3	5	0	4	1	4	0	8	0	1	0	0	7	15	2	1	3
Arid1b	KY008447	TCTGCCCATGGTCGGTCCGG	9014	1626	51	270	273	708	2222	306	114	140	1336	5150	142	426	1651	3407	192	1924	43	398	355	93	42	1180	204	2227	95	31	174	51	30	221	68	238	40	171	63	1865	784	182	29	71	59	50	48	531	92
Arid1b	KY008448	TGTCTTACTGGTAGACTCGA	2721	537	14	6	253	38	77	38	2	0	38	0	32	29	362	71	241	16	5	114	27	1356	5	475	17	5	98	0	3	0	0	3	0	0	107	0	1	2	2	7	32	9	1	4	2	7	7
Arid1b	KY008449	GCTGAAGGCATTCGTCCCAG	2155	375	16	53	99	43	0	0	20	0	30	26	1	62	156	1	18	1	0	3	8	504	0	66	374	7	2	0	0	10	0	6	3	1	3	0	1	0	0	0	0	0	0	1	3	2	1
Arid1b	MGLibA_05070	CTGTGCACCTGGGGGACCGT	6950	777	5	2	26	24	136	18	3700	22	67	39	190	15	18	41	1189	14	36	7	83	26	862	157	17	36	1	0	1	2	3	10	4	19	8	8	4	3	5	4	22	6	16	44	5364	2	0
Arid1b	MGLibA_05071	ACAGTACCTGCAGCCGGCGG	2817	460	169	134	277	1767	220	319	199	1188	372	509	210	44	34	86	665	34	969	439	167	73	169	1564	87	130	931	652	215	61	36	1862	118	1596	49	224	9	668	8	52	16	20	60	31	21	14	20
Arid1b	MGLibA_05072	AGATCGGACCAGACCTCGAT	1059	157	1	20	0	13	1	0	9	0	0	0	7	1	1	2	2	0	4	0	3	0	3	12	0	5	0	0	0	0	0	0	0	0	0	0	4	2	1	1	16	5	0	2	1	0	0
Arid1b	MGLibB_05070	ATCTCCCCTGCGAGTATTCC	4868	992	40	994	492	337	219	15	38	16	115	49	33	2523	22	13	26	803	1437	58	20	96	84	52	76	107	4	23	384	0	5	711	7	1878	7	99	15	3	255	25	4	7	21	7	18	3	46
Arid1b	MGLibB_05071	ACAGCTTGCTGTCCGTACTG	3644	703	7	32	3	2	5	5	15	27	143	123	1	6	6	27	4	17	6	20	5	4	82	8	67	1	1612	3021	221	1980	11	3	31	13	17	4	0	4	2	0	0	60	78	4913	5	0	16
Arid2	KY008451	CTCAGCTGCGATATTCCCTA	2904	613	1	0	1	1	1	0	0	0	2	1	6	0	1	0	3	2	3	7	2	5	44	3	0	0	0	1	0	0	0	0	0	0	0	0	2	1	1	0	0	0	0	4	2	0	0
Arid2	KY008452	GCCCGAGAGACGGAACAGTC	1493	434	5	1	76	2	16	1	0	3	0	13	1	2	1587	57	22	2	5	108	4	3	5	3	0	117	0	0	16	0	0	7	0	17	8	0	3	0	1	9	0	0	0	5	3	1	4
Arid2	KY008453	GTACCGCAGAGTCGTATGTT	3051	1271	37	21	134	433	14	180	41	15	255	18	7	22	40	107	218	140	152	26	61	17	132	22	68	17	25	2	1	0	4	2	0	27	6	2	17	6	0	3	5	1	15	326	6	0	6
Arid2	KY008454	AGAAGTTGTTACGTACTGTG	1417	266	0	0	1	127	740	31	3	0	9	2	15	50	0	0	1	8	6	3	6	2	22	74	9	4	2	1	0	3	4	0	1	75	11	0	4	5	5	99	16	33	35	173	10	8	42
Arid2	MGLibA_05073	TACCAGCAACACAGCGTGTC	3539	1352	144	29	29	213	31	53	190	68	371	26	93	54	143	124	174	28	145	22	11	25	121	218	134	354	38	31	16	19	14	13	13	142	34	27	13	2	81	4	0	12	10	42	7	8	12
Arid2	MGLibA_05074	ATAGCGAAGTCCACTTCATT	3062	779	6	107	11	33	23	2	274	43	26	2	9	6	6	2	7	12	20	3	4	8	26	12	11	10	1	0	3	3	9	9	2	2	16	0	4	1	2	2	0	0	3	4	0	0	1
Arid2	MGLibA_05075	CACTTTACTGCTCGCTAATG	3264	1242	43	5324	184	1449	38	17	56	76	12	1301	166	5	58	47	25	22	48	77	413	97	4527	13	32	62	23	25	88	227	41	216	15	1550	441	82	10	46	5	54	881	152	42	13	12	16	15
Arid2	MGLibB_05073	TACCTGACACGCTGTGTTGC	5353	1716	192	2413	82	173	228	302	66	108	316	1867	29	56	34	190	151	23	77	1249	683	142	52	164	537	384	24	29	88	48	11	16	4	10	164	13	8974	2992	22	15	128	34	22	21	101	17	578
Arid2	MGLibB_05074	GCCGTTTAAGAAGATCCCTG	2797	869	3	11	6	0	2	6	2	3	4	3	2	2	2	0	10	5	1	6	10	3	13	0	3	6	0	0	0	2	0	2	0	2	3	1	1	5	8	1	0	0	0	8	7	1	1
Arid2	MGLibB_05075	TCCGCCTAAAGTAGTGACTC	3484	1324	24	18	28	241	17	31	7	202	195	5	30	34	70	39	32	27	54	182	49	6	107	43	23	20	5	0	7	1	35	4	3	3	6	437	2	1	4	0	2	0	18	66	7	15	60
Arid4a	KY008470	GTCCAGCAAAGGCATTTCCG	2897	709	9	14	12	600	30	30	36	22	250	15	4	7	51	34	13	19	32	37	1666	26	13	57	413	572	406	5	130	175	212	2	67	349	363	122	14	223	220	12	2	659	2	6	43	0	7
Arid4a	KY008471	GTTTGAGTCCGTATTCTCCT	4029	1189	17	430	2046	35	118	40	215	99	202	19	59	6	117	353	1035	641	208	25	12	11	11	12	28	706	7	3	5	3	0	7	2	45	34	2	13	11	8	29	1	370	23	96	5	11	8
Arid4a	KY008472	GTGAAGGTCAAGTACGGACG	1631	244	22	2487	188	2915	1	12	132	44	2	8	4916	10	1	6	2	2	4	131	978	3	517	6	0	94	3	79	2	28	55	6250	13	155	8	369	29	77	8339	170	89	964	11	175	1821	333	199
Arid4a	KY008473	ACTACTACGGATGGAACGTC	2207	286	14	1	0	173	3	10	104	5	1	9	1	4	5	4	5	1	4	0	2	2	19	51	5	275	9	1	144	0	3	4	0	7	0	0	0	0	0	0	0	0	0	1	0	45	4
Arid4a	KY008474	ACTTTGGTTCCCGTCAGGCA	3225	667	64	3	22	11	24	46	80	29	7	8	442	1108	26	1	164	34	15	84	21	2	4	40	12	866	52	1547	27	5	423	11	185	2500	9	0	27	2372	0	0	8	0	23	1314	4	312	8
Arid4a	MGLibA_05085	GATGTCAGTGCCAAGTACCG	1861	322	4	0	15	1	22	0	0	22	0	1	16	3	1940	0	0	7	9	3	1	3	1	4	11	4	2	0	10	6	1	23	0	6	5	0	1	0	1	2	74	1	0	1	0	1	0
Arid4a	MGLibA_05086	CTCTTAAAGGGCCCTTTACT	2275	595	8	7	28	188	17	11	3	16	2	13	57	8	12	0	57	3	11	92	37	55	5	361	527	5	7	0	18	0	0	0	21	16	253	1	2	2	2	2	17	15	0	42	7	0	5
Arid4a	MGLibA_05087	GGTGCAAGATGACCAAGTAA	712	286	3	4	34	8	19	4	19	4	21	4	2	70	9	20	3	0	33	2	22	3	111	26	177	3	0	0	0	0	0	0	14	4	0	0	63	11	1	0	0	0	0	7	1	0	1
Arid4a	MGLibB_05085	CGGACCTCACTTTGCCTGAA	2836	580	54	25	17	8	10	32	149	6	11	11	37	70	15	3	133	22	9	33	102	8	24	11	88	18	3	0	10	2	2	1	7	0	4	17	1	0	5	24	1	5	1	5	5	0	0
Arid4a	MGLibB_05086	GCAAATTGACAGATGCTAGT	797	629	20	22	155	3	4	28	310	17	5	40	11	8	2	4	1	6	71	12	9	4	45	28	31	142	0	1	19	3	5	5	40	31	8	11	4	6	3	6	13	4	4	3	6	0	32
Arid4a	MGLibB_05087	TGAGCCTGCCTACCTGACAG	4308	886	22	321	75	728	11518	135	1873	164	363	86	4319	444	2053	252	44	81	120	1184	1680	30	464	45	4367	1221	6	382	5	15	14	12	12	442	36	5	922	10	94	20	11	66	15	226	27	1874	6
Arid4b	KY008476	AGCACAGGCCGTTTGTTAAT	2496	549	27	179	77	15	50	7	79	18	100	4	113	90	15	13	276	183	12	10	5	6	170	16	1142	22	10	4	166	4	1	3	0	16	10	1	7	15	59	13	20	8	4	17	88	1941	12
Arid4b	KY008477	TCAGCAGGCGTCTCCTCTTT	6302	1699	475	13350	736	1688	1156	167	1739	163	36395	3222	24237	586	1190	428	2006	25237	580	188	66	214	5628	211	37	1443	279	245	33310	49986	116	821	1890	910	977	1594	166	13895	162	2507	478	185	106	59	174	272	298
Arid4b	KY008478	CGGTGGCAGAGCTAGGACCG	2762	208	0	0	1	16	520	0	11	38	0	1	10	0	1	0	0	0	0	10	1	4	0	5	0	0	0	0	0	11	2	0	0	19	23	0	0	3	0	86	0	74	0	1	30	2	2
Arid4b	KY008479	GAAGAAGAGCAAGCACGATC	1181	181	0	0	0	4	0	11	67	0	28	0	3	281	14	52	57	3	6	0	1	3	0	11	0	6	0	0	0	0	4	0	4	0	0	0	2	3	0	9	0	4	7	0	2	2	0
Arid4b	MGLibA_05088	GAATCTTGATGGTGCCTATC	2752	760	12	170	10	49	253	21	742	52	475	3	79	33	5	146	486	50	94	547	541	19	22	86	10267	299	41	26	54	6644	3896	492	4	1256	7	368	14	212	107	7	2	697	713	174	597	31	9
Arid4b	MGLibA_05089	CCTTCAGTGGGCCCTTTATG	4767	1440	7	29	706	110	1305	38	272	64	97	128	250	326	97	1527	240	95	6947	33	60	131	426	3473	96	171	65	54	1365	22	82	73	11	208	119	61	31	531	18	59	758	641	287	146	274	43	12
Arid4b	MGLibA_05090	ATTGATAACCGCTTCCTGAT	3593	644	78	70	0	1	44	312	15	1	3	22	12	0	145	3	81	97	58	18	21	21	2	1	13	9	3	0	0	0	1	0	0	8	3	2	0	1	2	1	1	1	4	16	10	8	5
Arid4b	MGLibB_05088	TCAGTGCCCACTGTCAAATA	2426	479	2	5	0	40	0	46	1	3	0	2	4	0	183	1	3	0	1	5	67	2	3	2	0	5	0	1	2	0	0	3	0	0	0	2	5	0	0	3	0	1	0	8	1	0	1
Arid4b	MGLibB_05089	AGTTCAGGATGACCACATAA	1382	179	0	0	0	31	12	0	0	25	0	0	10	0	0	1	21	8	12	6	246	0	12	0	0	0	0	0	0	0	0	1	38	0	0	0	0	1	3	0	0	1	4	9	1	1	0
Arid4b	MGLibB_05090	ACAGAAGGCTCCTCTGTATT	2354	331	1	7	11	56	4	21	9	2	0	2	0	0	2	64	13	1	100	0	3	4	15	167	10	23	2	1	2	232	0	2	0	3	1	0	0	0	0	1	2	0	31	4	0	0	1
Arnt	KY008689	TACAGAGGGCTATTAAGCGA	1537	349	3061	30	12	0	0	0	3	3	0	0	0	0	0	1	7	3	6	2	2	22	136	1	0	0	0	6	3	0	0	22	3	0	0	2	0	0	1	0	0	6	36	3	5	3	14
Arnt	KY008690	GGGCTATTAAGCGACGGTCA	926	289	11	26	0	109	17	1	36	264	11	59	46	388	7	417	5	3	32	17	9	1	27	27	34	0	37	3	211	2	25	17	2	0	18	0	2	0	0	1	8	0	1735	86	2	25	5
Arnt	KY008691	CAAGCTAACCATCTTACGCA	2246	1177	32	35	91	42	519	5	17	27	160	26	33	33	21	45	215	212	213	10	8	8	45	54	6	149	74	3	14	10	2	19	28	1	1	6	0	1	20	32	42	25	73	10	7	17	161
Arnt	KY008692	AGAAACGGCCATGCGTAAGA	1395	427	1078	8130	39	385	5	887	6	691	4	24	912	69	10	47	81	139	11	13	5	4	31	889	18	99	8	172	339	58	11339	69	4	29	10	14	7534	1451	1	179	85	3461	151	1	3	24	51
Arnt	KY008693	CAGGTGTGGTACTAGCTCCG	2223	528	81	16	10	199	7	2738	3	4	19	4	21	83	813	13	6	31	20	10	184	10	122	19	54	15	4	0	6	2	9	16	1	6	6	31	0	0	3	9	3	0	0	7	147	3	6
Arnt	MGLibA_05244	GTTAGCTGTAGTCGCCGCCA	4655	1014	52	1155	5186	88	108	87	121	188	667	192	89	36	3002	3722	58	38	353	90	43	667	19	325	13	1052	197	14442	19	91	10	1869	1209	48	40	1958	46	14	391	38	4	244	41	36	6	48	22
Arnt	MGLibA_05245	GCGGCGACTACAGCTAACCC	2122	637	26	24	234	53	51	27	8	9	100	6	189	185	16	3	18	67	7	42	6	14	2	16	13	15	41	0	15	30	0	360	2	1	11	27	2	4	87	3	13	5	1	7	117	1	10
Arnt	MGLibA_05246	GACATCAGATGTACCATCGC	3073	1692	22	40	132	30	76	31	60	91	75	32	20	45	73	496	19	73	49	27	15	23	127	19	90	415	8	2	15	11	56	0	37	24	87	13	8	19	754	8	6	8	7	32	15	1	9
Arnt	MGLibB_05244	GCTCCTCCACCTTGAATCCC	5741	2395	62	10	274	138	795	310	34	37	186	133	36	355	81	92	21	120	43	122	31	53	34	330	28	83	13	4	4	45	109	9	63	94	93	23	111	8	17	278	48	38	34	35	66	5	29
Arnt	MGLibB_05245	GCTCTTTGTCATTACACATC	3557	1566	943	314	89	293	119	71	116	116	184	44	32	281	228	368	42	60	83	3183	39	127	292	87	156	800	23	8	77	14	35	12	14	72	50	71	274	15	49	330	509	139	57	18	96	41	20
Arnt	MGLibB_05246	AGATGTGTAATGACAAAGAG	694	322	136	226	14	186	221	12	585	22	106	499	23	241	1638	892	121	13	340	87	78	53	167	31	260	72	519	74	6	38	3	54	83	489	126	57	150	39	151	208	154	513	32	42	2	62	13
Arnt2	MGLibA_05235	CGGATCGACGCTTTCCTCCT	5134	1862	101	141	224	558	61	82	135	14	410	64	47	322	83	80	24	41	405	254	47	317	10276	103	47	103	5	5	35	50	2	8	1	7	46	6	4	28	7	29	2	29	161	54	8	5	48
Arnt2	MGLibA_05236	ATGGACTTCGATGACGAAGA	1404	319	57	783	7	1226	321	4979	51	907	4	37	11	29	23	206	666	3	2	25	3	19	145	5055	19	305	2	238	18	14	21	77	60	154	473	12	33	93	179	4	4	9	5	8	15	839	9490
Arnt2	MGLibA_05237	TGGGAGCACGCTTTATGAGC	3700	1243	49	222	178	1117	135	281	144	316	1291	2921	7715	6149	927	4260	5241	1541	1522	4222	2884	6550	1131	2225	2090	2100	1102	1851	358	234	350	304	742	378	2793	4017	358	310	418	509	443	155	149	102	2976	342	5754
Arnt2	MGLibB_05235	ACCGGCAACAAATCGACTGA	1751	601	5	5	79	159	877	4	12	14	0	157	2	30	1	5	5	916	6	19	40	8	380	10	20	3	0	5	0	0	39	0	1	0	1	0	1	0	2	10	0	10	0	4	3	0	1
Arnt2	MGLibB_05236	TGTGCGAGACCGCCATGCGC	5976	2754	865	423	178	217	285	46	476	48	56	71	115	69	673	80	59	56	102	140	3973	69	142	295	641	5726	1	4	87	3	23	26	5	46	29	14	3	31	24	8	10	7	285	18	12	6	25
Arnt2	MGLibB_05237	GGGGCCATGCCTGCCCGAGG	1766	1001	32	25	16	44	436	16	376	45	245	14	10	219	21	237	20	41	5	466	36	26	17	11	4	64	37	0	73	0	13	2	28	2	13	4	4	0	43	6	4	6	3	285	7	9	0
Arrb1	KY008742	CTGACCTGCGCCTTCCGGTA	5174	1495	1160	4401	58	228	35	426	42	8025	137	16	29	509	38	66	150	131	71	69	65	27	156	5020	20	87	47	507	13042	367	4	372	613	2242	21	99	457	5743	59	207	16094	1158	40	208	12155	15111	1369
Arrb1	KY008743	CTGCGCCTTCCGGTATGGCC	5274	1349	13	19	13	18	237	7	38	2	99	5	38	15	84	17	531	17	11	34	94	7	40	290	38	24	8	0	3	7	6	4	5	16	11	6	21	2	3	3	4	9	7	6	8	0	15
Arrb1	KY008744	GGCTTCTTGTCCTCGGGGGC	3026	723	4	132	66	3718	19	32	51	12	25	1	8	2	63	26	103	5	33	1061	4	12	188	66	884	94	28	5	2	6	1	1	2	2	3	2	3	10	2	0	13	1	1	6	29	13	5
Arrb1	KY008745	TGTGCGGCTAGTCATCCGGA	3267	612	86	78	107	150	18	177	38	31	295	47	26	15	5	192	9	39	17	8	107	16	224	40	8	792	0	3	3	24	4	8	18	10	32	2	6	3	40	6	41	13	44	27	34	30	5
Arrb1	KY008746	CAGTGATGCCTCAAGGTGTA	2059	409	56	2	25	1	0	5	35	191	18	19	2	7	56	15	15	76	7	19	3	2	427	9	3	40	0	1	0	1	29	48	1	19	53	17	0	1	9	140	0	1	1	3	4	0	15
Arrb1	MGLibA_05277	ACTCACCCACGGGGTCCACG	2869	667	4	53	25	1091	20	29	5	38	2	9	1281	10	18	20	163	98	34	25	14	8	264	7	53	16	2771	56	2524	10	163	11	2	135	1	841	14736	162	1	37	0	0	86	866	4	13	7
Arrb1	MGLibA_05278	CCGCGGACCATGGGCGACAA	2349	782	3	67	47	39	9	3	7	5	26	6	1490	73	151	7	11	30	3	44	9	5	41	25	3	15	3	0	6	7	0	1	2	6	1	0	5	20	3	0	0	0	1	3	44	1	2
Arrb1	MGLibA_05279	CCGTGTCCCTTTGTCGCCCA	6601	1932	8	146	38	287	34	36	34	25	47	32	54	61	20	577	43	443	109	29	1845	28	205	3349	976	71	23	2	40	17	289	4	4	86	78	12	51	3	22	20	8	2153	199	14	11	12	829
Arrb1	MGLibB_05277	CGCCTTTCTTTGAGATACTC	2524	722	54	1234	3	16	116	422	8	139	336	1557	196	52	397	227	8	2	248	37	5478	212	1092	72	44	119	3	34	2282	18	12	66	100	197	597	9	34	14	11	4	23	6	12	8	10	15	192
Arrb1	MGLibB_05278	TGTGGACCACATTGACCTCG	4204	1078	298	308	151	198	1729	508	123	511	19	349	79	17	29	138	1420	663	506	296	382	8377	457	139	4920	366	30	23	50	3078	328	140	6	1689	699	3	67	1142	18	48	387	37	36058	8	5	12	16
Arrb1	MGLibB_05279	TCCCCCAGATGGTGTGGTCC	4304	1426	337	321	231	3226	1490	1104	4223	177	257	206	3373	2596	1541	318	486	2667	107	91	447	372	202	3801	572	20011	40	10	74	357	19	23	47	45	3248	48	38	354	43	6	165	1	35	232	11	21	39
Asf1a	KY008993	TCTGGGATGAGTCCTGCATT	3271	1079	238	307	254	538	232	543	2265	763	1648	30	230	747	260	37	854	365	54	124	222	324	758	592	702	138	9	30	236	52	75	383	439	1044	185	8	44	24	379	9	66	13	10	190	9	225	78
Asf1a	KY008994	AATAAATTCTTGACCTCGGT	774	97	1	0	58	19	0	0	3	0	0	2	0	5	22	2	1	9	0	1	9	0	1	4	0	0	0	0	0	0	0	0	0	0	0	0	0	0	0	0	0	0	0	0	1	0	0
Asf1a	MGLibA_05451	CTGATTACTTGCACCTACCG	4688	1065	11	35	121	962	95	41	12	203	28	73	16	47	2250	36	34	1271	13	92	154	12	121	135	19	15	388	164	17	20	2095	347	1	36	13	13	52	25	138	1005	463	7	6	5	12	25	2
Asf1a	MGLibA_05452	GATCACCTTCGAGTGCATCG	2159	1000	54	27	35	74	49	22	16	16	1252	14	38	95	8	81	68	25	62	12	92	1652	124	49	528	31	8	0	6	8	6	17	8	9	9	3	6	6	143	339	2	5	4	9	1	9	6
Asf1a	MGLibA_05453	CAGGTCCTCGATGCACTCGA	4460	1848	109	446	78	40	283	160	907	173	14271	19	189	262	148	38	25	101	599	41	177	106	160	169	27	248	18	5	4	12	4	8	23	22	17	11	21	15	6	21	0	8	30	14	19	6	2
Asf1a	MGLibB_05451	TAGGCTGATGCACCGAATGC	5749	2009	43	332	1363	5497	479	40	260	368	179	794	96	701	674	91	1023	1954	39	174	9556	92	402	118	130	833	1117	62	232	809	42	815	45	27	930	893	158	93	62	230	216	30	423	46	23	15	217
Asf1a	MGLibB_05452	TGCATTACCGTCAGCGTCAA	4261	2143	23	861	93	835	125	25	245	50	42	448	86	4197	322	53	57	177	31	59	295	281	511	32	978	195	4	1	8	7	22	91	56	25	46	2	279	70	11	13	7	16	6	167	13	0	4
Asf1a	MGLibB_05453	TGTTATGTTAGAATCCCACA	1787	346	28	201	0	57	2	1	1335	35	6	1	2182	4	51	3	4	0	3	32	6	16	2	152	2	3	1	3	1164	4	0	6	6	10	0	2	1	3	0	0	0	2044	2	1	0	4	6
Asf1b	KY008995	GAGTGGAAGATCATTTATGT	1636	532	36	0	1	78	24	8	25	11	30	4	9	93	6	16	8	299	22	2	15	4	3	248	2	2	5	5	2	10	0	0	4	9	6	1	2	11	9	3	2	0	3	1	3	2	10
Asf1b	KY008996	CATTCCTGAGACGGACGCCG	1951	683	19	501	204	2597	1415	1258	94	26	2273	25	1001	155	2766	2538	3635	56	102	165	212	96	816	235	54	27	417	38	680	638	230	27	150	71	262	248	22	2110	212	141	6	317	876	19828	11	216	21
Asf1b	KY008997	ATTCCTGAGACGGACGCCGT	1780	333	15	4	38	13	34	4	5	5	11	19	8	18	55	22	32	10	8	87	433	59	13	25	178	19	20	461	32	1	7	1	0	574	44	57	0	102	3	95	3	116	0	10	104	11	67
Asf1b	KY008998	TGGACAAGAGTTCATCCGTG	3176	1492	300	2631	554	288	641	137	196	77	116	43	149	1047	322	646	452	489	237	92	2036	127	1099	1159	492	212	336	15	11	171	42	455	41	454	18	3	489	172	12	14	1	4	28	32	2	17	21
Asf1b	MGLibA_05454	CGCGGTGATGGCCAAGGTGT	3735	1283	11	26	8	15	83	86	25	71	64	69	27	75	13	14	18	9	20	14	28	17	113	14	5	6	7	6	11	4	5	68	26	9	12	18	2	9	9	1	1	1	2	5	65	1	6
Asf1b	MGLibA_05455	CACATTCAGCACCGACACCT	4207	1126	44	86	76	180	117	48	46	26	68	43	37	40	175	54	27	30	30	52	236	32	8	47	87	14	14	1	52	1	18	70	2	70	263	43	1	13	81	43	29	27	25	523	3	4	26
Asf1b	MGLibA_05456	GGTGGGTTCTCTCGAAGCTC	856	248	0	22	2	9	6	1	10	9	6	0	6	29	9	2	12	6	13	25	10	6	1	4	4	9	406	11	0	2	0	0	0	8	8	1	1	2	1	1	0	0	3	116	0	0	0
Asf1b	MGLibB_05454	TGTCCCAGTTGATATGGAAT	3235	1132	3	104	47	82	25	16	95	1	852	24	585	252	1177	25	212	38	21	38	64	58	171	4	22	83	0	3	52	15	3	13	3	6	11	8	26	0	21	6	4	4	3	1	3	1	12
Asf1b	MGLibB_05455	TGTTGACATAGTAGCCCACA	2327	405	325	21	7	0	45	63	75	8	11	47	9	475	2	6	113	0	4	4	1	0	6	3	5	46	957	420	500	83	3	533	3	3	0	0	1	6	2	2	1	1	1245	6	2	0	7
Asf1b	MGLibB_05456	CATAAATGATCTTCCACTCC	4391	1692	14	105	230	237	92	241	114	484	185	22	183	93	102	248	467	330	85	65	61	54	47	1617	1150	50	17	4	19	8	8	16	54	39	93	23	74	48	59	52	44	39	21	9	21	65	68
Ash1l	KY009010	CTCGCAAGCGGAATCGAGAA	704	65	0	0	0	4	0	0	0	1	0	1	0	0	0	1	0	0	0	0	0	0	0	0	0	0	0	0	0	0	0	0	1	0	0	0	0	0	0	0	0	0	0	0	0	0	0
Ash1l	KY009011	ACTTGGCACCGTAGTTGGAC	3188	558	19	37	84	6	53	94	103	1	348	505	8	5	1	32	19	106	152	629	18	17	68	18	124	159	9	68	25	0	699	2306	60	44	316	8	699	56	15	8	1198	88	36	1509	2278	3	13
Ash1l	KY009012	AATCTTCTTCGTAACATCCT	3044	584	1	16	1	129	11	5	91	15	3	4	7	20	1	4	69	1	21	11	15	19	253	19	23	17	23	3	5	0	1	0	1	4	24	4	4	16	0	8	2	112	4	7	2	4	6
Ash1l	KY009013	ACTTTGGCAATCGGCGTTTA	1160	291	1	25	2	6	0	1	2	1	0	3	0	2	0	1	0	1	139	9	3	4	11	10	35	0	0	0	0	0	0	0	1	1	0	0	1	3	7	0	2	0	2	3	1	2	0
Ash1l	KY009014	GCCATCTCTGGAGGTACGCT	3390	856	17	4	293	127	82	53	73	76	73	58	153	21	76	5	16	19	49	159	32	196	186	81	2153	228	12	8	1	9	8	29	7	151	5	6	3	8	55	44	31	4	27	44	14	7	175
Ash1l	MGLibA_05463	GGGCATTTCCGAGGTCGACC	1903	586	16	88	54	157	178	130	13	1194	153	14	228	24	269	786	592	141	40	198	34	131	41	194	65	713	2	3	368	31	23	12	23	5	275	28	55	8	11	10	1	2	3	7	1	2	28
Ash1l	MGLibA_05464	AGCCCTGTTAGTAGTGACGC	3908	571	76	1732	24	8	10	42	16	41	1746	15	199	13094	18	15	3	7017	39	21	132	26304	40	6	5	23	7	6	1	35	10	0	3	10	3	10	3	18	29	4	12	2	11	725	2	13	28
Ash1l	MGLibA_05465	TTAGGACTTGGCACCGTAGT	3886	734	18	302	32	332	60	33	457	160	957	174	55	94	38	295	91	1037	102	167	31	51	355	21	781	324	14	9	16	4	0	45	5	17	21	20	22	21	100	124	5	124	77	135	148	73	666
Ash1l	MGLibB_05463	ATTGTAGCCCTACTCGTAAA	1872	264	0	0	0	4	0	9	6	1	0	3	26	4	0	1	0	0	1	0	7	2	2	0	0	0	0	0	0	0	0	0	0	1	0	0	0	0	0	0	0	0	1	2	0	1	1
Ash1l	MGLibB_05464	AAGGTTTATCGGAAGCTGAC	1688	278	918	12	0	1	4	0	0	1	5	0	0	0	572	2	4	0	3	58	48	7960	35	1	1	28	28	29	1	0	24	0	3	748	0	2	0	17	0	1	394	0	337	0	4	4	0
Ash1l	MGLibB_05465	GGCCGCCCAGTTTGTCAGCC	2898	1054	10899	376	425	113	1116	51	101	90	201	158	48	83	110	151	19	511	3850	207	4395	87	538	28	2069	462	7	2	22	26	147	375	431	255	54	6	37	2	90	19	3	5	127	8836	26	47	304
Ash2l	KY009015	TCCATCTTGCTGCTTACGCT	6582	1411	158	476	261	375	60	2885	531	301	333	3374	2541	2510	2617	854	9456	1004	1637	283	199	168	204	601	79	220	473	302	1414	44	1287	63	340	1176	381	78	113	761	2629	93	561	68	2036	93	83	491	35
Ash2l	KY009018	GTGCCTTGGCGAATTTGACG	2764	185	44	65	1	11	20	15	130	14	1	5	44	59	63	100	14	29	45	326	13	1206	44	14	3	9	224	11	526	21	442	103	1176	26	494	5	96	22	34	8	6510	53	19	17	2	31	36
Ash2l	KY009019	TGCTTGCTTCCGGAGAAAGT	2491	99	0	0	21	0	0	0	0	2	0	0	0	0	0	0	0	1	0	0	0	0	0	0	0	0	0	0	0	0	0	0	0	0	0	0	0	0	0	0	0	0	2	0	0	2	0
Ash2l	MGLibA_05466	TGGTTCACCGCTGACACCTT	5108	612	1002	18	9	13	28	1	117	5	15	17	493	8	178	1048	3	294	26	10	41	4	204	550	1	236	38	4	128	1	19	1	1	6	13	1	111	15	0	4	13	46	8	23	4	49	2
Ash2l	MGLibA_05467	CTGCCACGTCAAATTCGCCA	4780	210	0	1	0	0	0	17	0	0	1	0	2	3	46	1	0	1	0	31	3	28	4	0	0	2	0	4	0	35	0	0	4	6	1	0	0	0	4	0	7	0	0	0	0	0	0
Ash2l	MGLibA_05468	GACGTGGCAGTCTCGAACAC	1924	159	1	26	0	28	4	0	0	1	0	1	6	1	0	62	0	2	1	18	1454	0	3	165	15	13	0	0	2	3	1	1	0	2	0	0	0	0	0	0	0	0	0	2	0	0	0
Ash2l	MGLibB_05466	TCACGACGTGTCTATTCCAA	3252	389	33	37	105	49	80	0	302	16	15	1	3	20	4	699	2	119	166	16	31	40	631	139	699	42	2	63	13	7	309	4	35	24	0	1	42	53	267	16	102	692	67	160	48	5	58
Ash2l	MGLibB_05467	ATTGCAATGGAAGCTGTAGT	1764	185	7	5	0	55	5	1	0	1	11	0	0	0	0	1	2	0	0	2	1	2	3	8	1	0	1	1	0	2	4	0	2	0	0	0	0	0	10	0	0	5	0	0	0	2	0
Ash2l	MGLibB_05468	CAATAACATTGTCAAAACAA	669	121	45	0	0	1	1	0	0	0	0	0	0	0	0	0	0	0	0	0	1	0	0	0	1	0	0	0	0	0	0	0	0	1	3	0	0	0	1	15	0	0	1	5	2	0	0
Asxl1	KY009108	AGACTATACATACCTGACGC	3644	188	669	27	0	0	0	1	0	0	1	29	2	0	2	0	456	0	55	1	0	0	13	3	0	0	0	2	2	3	0	0	0	0	353	0	10	0	1	511	1	1	7	0	4	156	1
Asxl1	KY009109	CCCAACACCCGTCAACGGGA	1645	206	1	1	0	5	0	5	1	1	0	1	0	4	0	1	1	2	1	7	2	2	3	46	2	75	2	3	0	0	2	0	0	4	70	0	4	0	5	0	0	13	1	2	0	0	0
Asxl1	KY009110	TCCGTCCCGTTGACGGGTGT	5261	2285	634	823	3448	2251	1589	1680	850	605	1345	851	3044	668	1423	2122	730	4008	4615	1633	276	965	566	317	8052	675	3321	586	1756	894	1170	647	145	240	1988	211	323	60	2013	242	181	32	1540	1038	242	288	5000
Asxl1	KY009111	AGGACTGACGATCTTCAAGC	1708	407	83	96	20	332	252	187	55	294	76	68	40	129	157	148	17	347	206	369	95	45	94	180	490	52	11	3	67	108	8	89	30	72	256	21	76	17	18	34	1	3	53	2	1	27	7
Asxl1	KY009112	CCCCCGGATCGTCCCCATCA	5221	1652	132	229	460	2141	372	259	2174	292	2511	173	1597	343	1938	340	165	5961	12596	384	469	467	298	269	114	6843	1127	29	29	795	38	76	127	869	487	587	333	2052	133	123	332	129	139	114	367	18	37
Asxl1	MGLibA_05550	GCCAGAGGACTCCGCTGATG	3002	431	1	86	2	1	2	2	12	1	16	1	1	84	198	2	39	3	4	6	161	2	12	3	8	0	0	0	0	0	0	4	6	2	23	6	12	4	7	8	0	0	2	22	5	2	1
Asxl1	MGLibA_05551	ATGGCATTGAGGCACGCAAG	2505	370	14	1	18	9	4	273	1	3	4	0	34	0	7	3	7	0	3	34	28	3	10	15	0	0	1	0	2	0	2	2	0	0	6	6	0	0	1	17	0	0	1632	44	3	2	2
Asxl1	MGLibA_05552	TGAGTGTGAAAAGACTAATG	1240	545	9	7	4	42	2	3	0	7	125	0	6	25	25	20	239	38	852	19	1	9	4	30	17	18	2	0	0	11	2	3	0	4	19	1	9	1	1	2	0	0	6	102	4	0	8
Asxl1	MGLibB_05550	ATGACCTGCAGAATCTGTTT	2364	361	18	20	15	0	152	0	28	5	0	313	2	0	0	2	0	0	3	3	3	1	6	0	5	520	1	0	1	0	0	0	5	0	0	6	2	3	21	0	0	1	0	1	1	3	0
Asxl1	MGLibB_05551	GACACCAAAACAGATTCTGC	1491	70	0	0	0	0	2	0	0	4	0	0	3	2	2	0	4	0	0	1	1	0	0	0	0	0	0	0	0	0	0	0	0	0	0	0	0	0	0	0	2	0	0	0	0	14	0
Asxl1	MGLibB_05552	CCCACAGCTTTCCACATCAG	2988	265	1	1	2	17	54	1	8	5	20	6	3	1	9	3	36	192	5	13	11	1	2	6	3	0	2	0	1	1	2	19	2	2	2	0	1	1	1	0	1	13	0	2	1	0	1
Asxl2	MGLibA_05553	GTATACACGCCCATTCTACC	2557	352	0	30	6	289	548	4	70	7	61	17	29	5	0	2	3	117	13	22	2	5	25	8	15	4	40	0	0	1	10	6	0	3	1	2	35	1	193	0	2	1	15	2	5	0	2
Asxl2	MGLibA_05554	AATGGGCGTGTATACTTTGA	2711	374	3	6	2	6	2	128	3	0	0	6	0	1	3	117	1	0	0	2	4	0	1	4	19	0	0	0	0	0	1	0	0	0	2	0	3	2	0	0	0	0	2	12	3	8	3
Asxl2	MGLibA_05555	GACAGCTCTTTCACTCCATC	3598	676	15	180	3	82	26	48	33	1958	79	7384	5	44	8	21	14	2	11	47	386	10	105	62	712	379	9	782	43	2	2116	387	423	24	7	11	10	181	1	26	4	142	94	14032	46	7248	8
Asxl2	MGLibB_05553	GAGTCATAAAGAAATTCTTC	646	65	0	0	0	9	0	3	1	0	100	0	3	1	15	33	11	6	0	7	1	0	11	0	17	3	0	1	0	0	1	0	2	19	41	0	0	1	6	63	0	0	5	0	1	1	1
Asxl2	MGLibB_05554	AAGAATTTCTTTATGACTCA	1125	417	5	45	6	139	8	2	96	1	4	358	4	21	35	12	37	88	65	10	3	9	6	5	576	156	4	1	3	7	310	3	1	3	0	2	0	4	0	0	2	1	11	22	3	1	40
Asxl2	MGLibB_05555	TTTCAGAAAGATGTGCCAGA	1700	207	1	0	96	0	6	0	0	0	0	0	0	12	0	0	168	4	3	204	1	3	1	0	0	2	0	0	0	0	0	0	0	0	4	0	0	0	2	1	0	0	0	3	10	2	0
Asxl3	KY009115	AGCCCTCCAAGTCCCCCGAT	3323	821	14624	932	349	613	764	125	319	26	108	2441	1149	491	14	213	123	234	715	114	1075	20	203	708	70	2520	45	833	347	242	6	207	20	228	258	136	496	176	11	3649	149	23	3463	629	186	55	24
Asxl3	KY009116	ACTATCTTCACTTCGATGTG	4269	1083	948	114	470	123	19	26	44	111	56	9297	348	166299	541	133	62	9	70	34	14	5	39	10	254	65	4643	64	394	8	7	65	3	4065	3	289	6	339	305	73	1445	3452	182	140	10	114	6
Asxl3	KY009117	TGTCATTTCTTATCCCATCG	6325	1409	9	52	452	85	79	251	121	3	148	28	24	59	138	33	87	103	33	136	335	18	17	8	10	62	20860	252	27	61	2	18	3	22	311	4	334	19	7	88	23	5	3	18	19	2	2
Asxl3	MGLibA_05556	GAGCAGTCGGATTCGCCTTC	2578	731	132	129	10217	2606	128	255	118	264	41	65	954	612	268	252	522	447	186	4047	258	30	9	659	19	58	309	2	7	261	2679	34	25	97	50	620	95	23	8	8	2	19	34	10	14	51	35
Asxl3	MGLibA_05557	TTTGCACTGCCGTGTTCGTA	4457	1270	24	48	23	21	29	28	18	180	31	130	1158	62	252	17	5	6	47	48	73	6	203	22	55	6	103	7	10	853	20	6	1	4	37	0	18	10	2	32	0	2	30	5	5	2	1
Asxl3	MGLibA_05558	AGATTGCAGCCTTACGAACA	1939	231	5	29	1	31	5	13	0	24	1	5	5	11	4	8	4	37	28	43	9	20	4	27	63	10	0	0	5	10	0	6	2	6	6	4	6	8	23	5	0	0	3	2	1	2	1
Asxl3	MGLibB_05556	TTAGGATCCGAGTCTAAAAA	568	209	50	15	57	647	27	21	247	28	32	2521	88	10	6	3	1	108	227	42	2	8	5	87	1444	15	3	7	125	1	0	1	10	20	9	2	1	1	3	24	1	7	8	2	30	5	0
Asxl3	MGLibB_05557	CTGCCATCTCAGCGCCATCC	5907	2224	19	117	2736	675	1221	61	159	357	1113	80	1220	90	242	316	3554	232	302	112	134	395	1918	208	73	90	1063	55	16	118	147	24	941	144	1110	32	139	473	1277	77	266	18	28	49	3110	26	39
Asxl3	MGLibB_05558	TGCTCATCAGACACCTTTAA	2198	790	37	37	16	17	398	44	85	389	177	25	43	40	61	2067	72	114	334	6	29	28	6959	33	81	18	11	0	3	0	53	9	3	281	15	0	115	1	3	346	2	46	13	4	29	3	17
Asz1	KY009119	AACCTGAGTATGACCGTCTC	3294	447	1	60	2	0	5	0	2	21	11	5	2	0	0	9	5	3	3	2	13	1	246	33	14	0	0	7	50	0	0	3	1	22	0	0	178	0	0	0	0	0	0	1	2	1	1
Asz1	KY009121	TGCCCGAGACGGTCATACTC	5028	1971	90	263	297	107	680	19	119	40	186	94	59	1351	659	33	4454	128	3693	1391	108	147	478	122	140	219	235	1	34	152	5	81	17	156	228	104	87	27	333	79	37	48	80	346	397	24	42
Asz1	KY009122	AACTAAAGAAATATCTCCGG	835	37	2	0	0	0	1	0	0	0	0	0	0	0	0	1	0	0	0	0	0	0	0	0	0	0	0	0	0	0	0	0	0	0	0	0	0	0	0	0	5	0	0	0	0	0	0
Asz1	MGLibA_05559	TCTTATGTATGCCGCTAGTG	4897	975	18	327	6	396	210	50	51	59	218	87	1101	156	184	41	178	35	21	15	132	7150	107	1763	162	14	12	0	2	13	115	233	6	12	18	2	2	4	4	204	12	6	28	6	1	51	2
Asz1	MGLibA_05560	CGGAGCCGAAGTTAACGCCC	2634	309	16	3	2	1	139	15	17	3	2	0	26	61	6	42	2	9	3	19	3	10	152	97	16	45	0	6	0	28	0	1	1	3	1	2	3	0	0	0	0	0	4	9	4	5	6
Asz1	MGLibA_05561	CAACCTGAGTATGACCGTCT	5346	851	42	206	41	451	23	423	40	6	3	56	89	64	863	119	1912	7	85	152	54	98	37	102	178	27	1	3	3	127	5	17	3	52	63	6	1433	31	4	8	13	8	0	51	3	9	3
Asz1	MGLibB_05559	AGAGCTGGTTCGCTTCCTTT	2674	602	7	4	1	8	32	23	11	22	892	43	49	0	10	246	6	2	50	4	6	7	656	9	552	382	1	0	2	0	10	0	1	81	195	3	14	592	1	63	20	14	1	5	6	1	20
Asz1	MGLibB_05560	ATAAGTGCTTGTTCTGCTCG	1977	157	0	4	2	10	4	8	10	5	123	0	14	585	2	0	0	25	12	106	16475	0	9	7	2	148	0	0	0	0	2	0	0	332	7	0	0	130	0	0	2	0	0	0	27	137	0
Asz1	MGLibB_05561	TCTTACCTACAAGCAGTATT	3259	757	1276	1548	70	979	1258	91	1181	116	418	486	315	135	491	1140	370	7151	47	7	52	528	54	1	39	34	863	6513	22	81	668	97	36	8	38	8	75	82	58	710	146	78	339	55	1465	68	2
Atad2	KY009128	TCTGCGGGTACCGTCGACGC	3327	658	22	81	2	47	11	6	83	592	109	51	36	136	113	37	26	54	12	5	33	12	7	55	5	40	639	1	5	1	58	21	4	574	302	4	8	5	16	5	19	2	556	4	5	11	7
Atad2	KY009129	GACCGGGCCTCCGTAAAGCA	2037	781	102	13	1162	7	332	9	677	1010	141	2217	9	110	55	1116	102	44	77	1816	20	19	267	15	1446	853	8	17	12	3	4	1	4	12	20	4	285	12	6	2	6	7	2	48	104	139	6
Atad2	KY009130	CTGCTCATTCGTTTACAATA	2919	1102	64	139	22	110	186	325	365	25	9	36	59	45	695	56	23	15	68	23	14	51	617	443	83	30	5	8	8	32	19	8	29	21	21	1	43	18	6	7	43	23	9	29	40	1650	4
Atad2	KY009132	CGGCCCAGATTGCGCCGAGC	3054	658	27	53	1435	1153	29	975	14	89	33	85	185	273	30	24	5	1408	16	289	34	6	20	790	25	29	1661	25	427	2272	11	8	3	159	191	17	51	5	3	45	15	9629	14	3	43	4	34
Atad2	MGLibA_05568	ACCACAACACGCGCTCTTTA	2278	617	252	28	24	7	109	23	11	16	92	5	15	22	15	541	8	467	17	59	59	60	123	275	71	93	39	1	62	8	3	47	15	31	128	13	5	4	39	14	12	4	29	153	67	2	23
Atad2	MGLibA_05569	TAGGCAATTTGCTCGACAGC	2291	276	0	11	12	247	15	1	2	29	43	1	248	42	5	27	21	17	6	8	4	7	11	13	86	38	10	1	4	0	0	8	1	59	0	5	806	6	1	4	0	0	3	4	2	0	0
Atad2	MGLibA_05570	TTCCTCAATGAGCGAATAAC	1528	228	10	2	0	0	0	0	0	18	1	10	1	0	5	1	1	1	2	1	1	22	6	593	0	17	20	0	0	1	0	1	0	0	7	1	0	0	0	51	0	123	0	0	1	1	2
Atad2	MGLibB_05568	ACCTTAAAGAGCGCGTGTTG	2219	293	8	7	804	30	0	32	5	343	9	855	285	7717	1317	15	153	8	64	357	89	8	25	6	16	88	7	12	2	9	11	181	12	3	22	2	5	7	97	1712	2278	12	1	8	5	3	6
Atad2	MGLibB_05569	TCGTGCAAATGTTCTGCAGT	3815	673	61	46	4	5	4	1	17	11	6	3	6	8	13	9	93	13	13	19	4	24	40	62	2	7	0	10	4	11	3	4	35	3	178	65	7	1	1	2	1	3	5	5	1	6	0
Atad2	MGLibB_05570	TGAAAAAGATGCGCAGACAG	1047	439	14	54	1	16	18	7	0	2	87	72	5	1	1	4	3	1	7	9	315	4	3	1	3	25	0	0	0	0	0	1	0	0	1	0	1	3	2	0	0	1	3	2	0	1	2
Atad2b	KY009133	CCGCTCCTCTAAGACGCGCG	1927	280	5	8	4	681	43	1	4	0	3	17	1	15	0	58	0	4	3	15	0	1	3	14	48	10	35	0	0	0	0	1	4	31	2	18	1	18	0	9	0	1	7969	262	2	1	8
Atad2b	KY009134	CGGCTGTTTCAAAGTGCGTT	1706	368	314	1	15	317	1	6	8	0	1	1	54	29	115	0	8	64	2	2	21	177	1018	5	14	40	4	0	7	17	4	0	0	0	2	0	0	0	1	0	0	1	0	1	1	2	0
Atad2b	KY009135	TCAGAAAAAGTTGTCGGTCC	2086	610	294	13364	268	134	26	7	889	47	430	30	76	620	991	2140	362	522	14	19	10	20	31	63	155	107	3914	39	4	8	134078	6	39	21	0	1	16	11	9	7	2749	161	3	14	11	418	12
Atad2b	KY009137	CCATCATATTCACGCTTTGA	5257	1871	189	3585	473	609	715	354	115	555	2780	353	627	945	309	3485	1112	6422	151	84	108	991	5343	2210	349	8672	337	99	6311	4065	49	62	1057	308	769	66	1163	72	169	760	351	28	109	38	64	72	96
Atad2b	MGLibA_05565	ATCCGACGAAACCGTCGATC	1697	861	110	698	629	727	2792	1429	220	41	84	535	509	140	1911	525	3715	1049	116	793	147	478	766	1696	2473	91	68	5	274	41	71	23	350	60	3599	65	168	34	1157	24	128	163	373	55	72	35	166
Atad2b	MGLibA_05566	TCTCTACTTCGCCTGATCGA	6876	1795	12952	8027	7820	7726	22314	3728	1603	34898	1083	8695	10442	10861	19052	7462	2007	877	1164	472	3092	3055	6217	4098	19233	1185	13776	936	73358	4266	152	4147	160288	13284	3797	1486	46488	8002	1309	10529	3479	290	15494	16784	1872	8885	630
Atad2b	MGLibA_05567	CACAAGCTACTATGTCCGTT	3843	861	4	6	11	145	92	19	11	9	202	4	143	4	1018	39	2	9	20	3	30	3	17	165	27	6	2	0	8	2	1	0	0	13	2	0	3	2	91	0	12	3	13	3	3	8	1845
Atad2b	MGLibB_05565	TGTTTCAAAGTGCGTTTGGC	5748	1206	31	14	248	8842	61	338	8	16	20	6	17	7	26	5	20	17	2	5	21	71	33	93	214	19	7	13	4	42	0	11	29	3	371	0	5	36	147	3	2	6	3	25	10	2	10
Atad2b	MGLibB_05566	GGCGACCTTTCATGTATAAA	799	457	7	32	111	15	1	242	84	90	78	113	29	46	28	18	59	113	76	348	109	54	65	51	94	36	3	2	248	80	4	13	6	3	27	30	1074	12	4	4	0	2	8	10	7	57	61
Atad2b	MGLibB_05567	CTTCGAAGCCACCCCCTTCG	7235	2084	767	4969	2343	4699	9390	1051	1274	1776	4571	11219	1987	8403	1936	2188	1890	3276	9139	449	1882	1948	2413	7744	3904	5849	1694	2060	1408	625	634	525	2582	835	3398	743	1155	794	2082	342	1707	1397	20188	4455	983	272	1406
Atf7ip	KY009199	TGAACCGGTCGCAAGGGTCG	3170	686	1435	5622	3833	794	1949	920	3047	674	1254	452	4029	3812	123	1274	598	4533	2810	808	1254	3407	5600	784	1949	1768	9584	213	1382	2076	10264	59	415	943	1540	961	255	676	1189	741	922	256	50	1202	85	147	3480
Atf7ip	KY009200	GCCGCCACGACCCTTGCGAC	5814	974	10	60	10	5	19	12	17	68	75	6	36	7	28	8	198	7	15	10	9	7	14	217	11	11	0	0	0	2	7	9	27	13	3	2	14	2	2	1	0	3	2	5	4	1	5
Atf7ip	KY009201	AGACTGTGAATCACCGGAGG	1588	317	1	10	8	1	9	1	0	1	2	5	3	22	90	140	1	2	1408	2	1	4	4	9	1	4	1	0	1	0	0	0	0	3	0	0	1	0	0	0	2	0	21	2	0	1	0
Atf7ip	KY009202	TCGAGAGCAGGCTCAGCGAT	1992	525	15	18	111	229	69	108	44	10	12	41	78	102	36	59	106	452	22	20	395	46	540	269	53	92	1	1	37	7	1	9	1	2	7	2	9	32	3	2	13	0	4	277	41	8	2
Atf7ip	MGLibA_05610	CCGTACGTACTTCTCACAGG	4571	988	12	2	979	208	63	611	27	984	141	1	4	0	185	6	29	45	17	65	22	6	4	2	39	63	0	2	6	12	6	1	16	60	6	3	0	0	72	81	345	102	1	23	0	2	2
Atf7ip	MGLibA_05611	TCCAAAACGTTTGGTTAACC	1605	821	0	0	1	0	0	16	257	3	0	5	1	1	0	0	1	0	4	1	3	3	1	5	4	27	0	0	0	0	2	0	4	0	0	0	11	3	2	0	0	0	2	2	3	3	2
Atf7ip	MGLibA_05612	GGCAGTGCTCACCGAGCTGC	4528	1043	8	73	10	82	16	1	15	4	40	13	8	24	1	14	5	7	1	9	42	9	4	17	7	50	0	0	119	1	2	6	7	4	8	4	1	0	1	8	1	5	6	6	4	1	5
Atf7ip	MGLibB_05610	TGCTGTGTTTGATAAGACGT	3441	414	3	0	1	1	6	1	0	1	4	0	0	16	2	0	5	10	1	3	1	1	4	7	0	0	0	0	0	1	1	0	0	0	0	0	2	0	2	2	0	0	0	2	2	0	0
Atf7ip	MGLibB_05611	ATTCTTCATCCATATATCGC	3252	380	18	35	937	273	1199	84	27	20	507	254	25	55	193	224	84	17	41	95	9	32	10	624	67	244	24	66	7	4	80	234	11	115	26	23	456	17	90	3	17	335	148	38	6	5	8
Atf7ip	MGLibB_05612	AGAGGAGCGAGTTCCAGCCG	1639	214	0	0	0	1	1	17	0	0	2	3	1	1	2	0	49	1	0	0	4	0	3	2	0	1	3	0	2	1	0	0	0	0	0	1	0	0	2	0	0	0	0	0	0	1	0
Atp6v0c	MGLibA_05868	ATGCTCACCGCTGAAGACCA	2673	55	0	1	0	0	9	0	22	0	0	0	0	2	0	0	0	0	17	1	1	2	0	7	10	12	1	0	0	0	1	0	0	0	0	0	0	0	0	0	0	0	0	0	0	0	3
Atp6v0c	MGLibA_05869	TGCGATGCCAGTGCCACTCT	8261	104	0	0	0	4	1	0	0	0	2	0	3	6	0	0	0	6	1	5	0	0	3	5	1	21	0	0	0	1	0	0	0	1	2	2	11	0	0	0	0	0	0	2	0	2	0
Atp6v0c	MGLibA_05870	ACAGCCATGGGAGCCGCCTA	3105	112	0	21	0	28	1	5	2	3	1	3	1	1	1	20	10	1	3	0	4	0	1	3	0	9	0	0	2	0	0	0	0	0	0	0	0	0	0	0	0	0	37	1	0	0	2
Atp6v0c	MGLibB_05868	CATGGGCGCCTCGTCCGCCA	4741	108	0	1	0	2	0	0	2	0	0	0	1	0	0	2	0	0	0	0	11	2	2	0	0	0	0	0	0	0	0	0	3	0	2	0	0	1	0	4	0	0	0	0	2	0	0
Atp6v0c	MGLibB_05869	AAAAGGACTACTTTGTGGAG	656	13	0	0	0	3	0	0	0	0	0	0	0	0	0	0	0	0	0	0	1	0	0	0	0	0	0	0	0	0	0	0	0	0	0	0	0	0	0	1	0	0	0	2	0	0	0
Atp6v0c	MGLibB_05870	GGCCTGAGTGTGGGGCTGAG	2314	78	0	22	14	4	1	10	0	203	3	4	0	0	58	5	333	1	0	1	0	5	8	241	1	3	2	0	1	0	0	52	6	2	0	1	0	0	0	0	0	2	43	19	0	1	10
Atrx	KY009736	TCATCTGAATTCGACATTGC	4760	1665	1333	3005	86	45	3091	769	819	2587	2079	220	463	56	12521	316	368	301	135	357	23	479	5548	237	685	551	1120	117	25	453	806	6968	32	1376	3150	6976	41	3947	48	1194	123	159	605	76	226	43	1204
Atrx	KY009737	CTTTCTGTCTGTCGCCTCAA	6019	667	0	40	3	7	527	1	13	7	31	13	15	4	13	0	4	3	5	5	4	5	7	4	2	7	0	0	1	1	2	0	3	2	0	0	2	6	0	0	0	6	12	8	3	8	5
Atrx	KY009738	ACGTGGGGATCTTCGAAGAT	1551	270	2	4	0	2	0	22	6	34	5	2	0	0	6	0	34	5	3	50	2	0	2	0	0	23	0	2	0	0	0	0	0	3	1	1	81	0	6	2	8	2	0	2	11	0	2
Atrx	KY009739	ATCAAGGAGACGGCAACAGT	1257	100	0	10	0	0	2	0	0	0	0	0	0	5	0	0	0	0	4	3	2	0	1	0	6	0	0	0	0	0	0	0	0	0	18	1	0	3	0	0	1	0	0	0	2	1	0
Atrx	KY009740	GACAATCTCAAAAAACGCGG	768	68	0	0	0	0	0	0	0	1	0	0	0	1	0	0	1	0	1	47	0	0	0	0	0	0	0	0	0	0	1	0	0	0	0	0	192	0	0	1	0	0	36	0	1	0	0
Atrx	MGLibA_05976	CTTTGGTTCATGACAAGTCG	2457	444	11	41	22	44	6	7	2	381	17	1	1	234	330	11	3	44	44	4	10	514	9088	13	7	10	4	1	21	0	1	0	8	0	0	0	0	1	30	4	7	1	2	2	5	3	5
Atrx	MGLibA_05977	TTCATTTACATTCTCATCCG	6800	1546	123	370	297	59	35	2	61	88	38	24	2125	92	39	11	37	29	10	116	39	35	73	927	1223	14	60	64	42	86	16	146	18	406	1139	6	257	9	18	13	394	30	67	13	9	11	7
Atrx	MGLibA_05978	TGGAAACAAGTTGAGTACAT	1572	524	57	123	15	22	2	458	0	26	15	9	39	9	34	43	4	54	163	137	82	1	12	77	23	556	0	0	2	1	2	1	0	2	0	1	2	1	17	0	0	4	2	3	2	1	14
Atrx	MGLibB_05976	TGGACTTAATTCTGATATGA	2229	635	32	24	1	225	8	0	3	7	10	0	29	22	3	1	0	3	6	381	3	2	81	10	1364	3	12	236	4	0	36	0	0	1	43	9	2249	25	4	12	0	6	1	6	0	2	1
Atrx	MGLibB_05977	ACTATGCAAAGCTTGCCAAA	1038	140	3	1	0	10	0	0	0	0	1	175	0	0	0	0	0	0	0	3	4	0	0	0	0	0	0	0	0	2	1	0	1	0	29	0	0	0	54	0	0	0	9	1	3	0	4
Atrx	MGLibB_05978	CCTTGATGAACCTGAAGATC	2542	416	12	9	56	8	38	10	41	0	3	8	40	0	5	32	3	13	5222	80	212	13	2	11	23	9	1065	9	14	109	4	0	0	5	5	10	0	0	0	34	135	1	12	6	3	32	8
Aurka	KY009830	TGGAGATCCAGTCGCACCTG	4454	131	0	0	0	0	0	0	0	0	0	0	0	1	0	7	0	0	0	1	0	0	0	0	0	0	0	0	0	0	0	1	0	0	0	2	0	0	0	0	159	0	0	2	1	30	0
Aurka	KY009831	ACAGCTGGAGAAGGCGAACG	1306	7	0	0	0	0	0	0	0	0	0	0	0	0	0	0	0	0	0	0	0	0	0	0	0	0	1	0	0	0	0	0	0	0	0	0	0	0	0	0	0	0	0	1	0	2	0
Aurka	KY009832	AGAAGGACACAGGACCCGCT	1499	170	91	21	24	21	632	24	67	44	45	1	9	8	149	56	258	1	7	173	15	101	17	45	62	7	2	18	0	7	67	11	0	645	20	6	4	0	36	0	0	68	59	7	207	5	285
Aurka	KY009834	CTTCGGTCCGAAACGCGTCT	3629	464	7	5	1032	69	53	24	102	16	9	25	46	20	0	44	22	36	14	9	3	26	3	18	0	5919	7	9	25	2	0	6	2	2	19	2	1	3	25	2	3	4	6	5	3	2	2
Aurka	MGLibA_06024	TCAGTCACCAAGACGCGTTT	3101	364	2	45	2	3	3	0	1	1	0	0	2	0	22	1	7	2	7	50	5	3	4	1	0	2	0	2	0	0	0	0	0	0	4	0	22	3	0	1	0	0	0	3	0	1	4
Aurka	MGLibA_06025	CCACTCACCGCAGGTGCGAC	3612	408	3	1	3	6	42	1	28	0	5	1787	5	15	29	3	68	4	15	14	8	942	10	2	1	2	0	0	8	2	5	1	6	7	26	1	3	0	1	1	0	1	0	3	1	4	0
Aurka	MGLibA_06026	GACCACTTACCGGAGGCTGC	2373	145	0	15	6	0	562	8	7	2	19	7	0	25	0	0	3	0	122	0	0	10	5	0	2	0	0	0	0	0	0	0	0	0	1	0	2	0	0	0	0	0	0	1	0	5	0
Aurka	MGLibB_06024	CGAACGTGGAGCACCAGCTT	2717	54	1	7	1	158	0	0	2	0	0	1	1	1	0	0	0	0	3	0	0	0	0	0	4	0	0	0	0	0	0	3	0	0	0	0	0	0	2	0	0	0	0	0	0	18	3
Aurka	MGLibB_06025	ATTCTGTACCTTAACAGGCC	3342	158	0	0	11	12	0	7	0	1	49	2	1	0	23	137	0	0	1	4	3	0	0	5	0	0	0	0	0	0	0	0	2	3	2	0	0	0	1	0	0	0	0	2	1	1	0
Aurka	MGLibB_06026	GTAAAGAAAACTGTGTCTCC	1316	140	0	0	0	0	0	0	0	0	1	0	0	0	0	14	0	0	0	0	0	0	2	0	0	0	0	0	0	0	8	0	0	0	0	0	0	0	0	0	0	1	1	0	1	0	0
Aurkb	KY009840	GAAGAAGAGCCGTTTCATCG	1426	20	0	1	60	5	0	0	6	0	0	4	0	1	0	0	3	0	2	528	0	0	0	9	0	21	2	11	0	0	0	1	0	0	0	0	0	1	36	1	0	9	0	0	0	0	5
Aurkb	KY009842	TCCTGGAATACGCCCCTCGC	6874	400	1	29	0	14	4	32	7562	13	13	19	66	4	28	11	0	140	6	13	16	5	3	15	2	8	0	0	5	3	0	1	5	5	3	0	0	689	27	3	6	24	38	1	29	10	1
Aurkb	KY009843	CCTTGTAGAGTTCCCCGCGA	3818	40	0	0	0	0	0	0	0	0	0	4	0	0	1	1	0	0	0	0	0	0	0	2	0	0	0	0	0	0	0	0	0	0	0	0	0	0	0	0	0	0	1	0	0	0	0
Aurkb	MGLibA_06027	TCCTTGTAGAGTTCCCCGCG	4376	62	1	0	0	0	0	0	0	1	2	3	0	0	0	1	0	0	0	1	0	0	1	1	0	0	0	0	0	0	2	3	3	0	0	2	0	0	0	0	0	0	0	1	1	2	4
Aurkb	MGLibA_06028	TTTCGATCTCTCGGCGAAGC	2356	549	59	172	257	31	13	440	195	46	124	59	3	124	7	18	150	1	31	400	12	2	64	1003	4	54	1	1	1	2	3	24	5	5	6	4	2	2	5	2	0	8	8	3	0	2	2
Aurkb	MGLibA_06029	CGATGAGCAGCGGACTGCCA	1826	154	1	62	0	0	4	3	0	0	3	0	2	1	1	0	2	0	5	3	0	3	0	0	3	36	1	2	0	0	3	0	1	0	1	0	0	0	0	0	0	0	0	1	1	0	1
Aurkb	MGLibB_06027	TCGCCGAGAGATCGAAATCC	1849	193	0	127	0	24	2	5	13	33	6	1	35	1	13	10	5	16	27	6	0	6	1	13	0	4	2	2	2	0	0	3	0	3	0	0	0	0	0	0	0	12	0	5	1	0	1
Aurkb	MGLibB_06028	GAGAGCAAGCGCAGATGTCG	1842	260	1	3	0	13	31	1	4	0	1	9	3	28	0	0	0	3	1	2	2	1	1	1	0	3	88	0	0	0	2	1	1	0	0	0	0	0	0	0	0	0	0	5	1	3	0
Aurkb	MGLibB_06029	CAGGGCTCCACTGCCTCGCA	3174	479	17	19	38	37	33	3	15	5	44	289	157	6	31	4	4	2	231	4	47	35	10	4	14	13	0	2	7	1	1	447	7	16	3	0	0	2	24	17	4	0	7	0	12	0	5
Aurkc	KY009845	GGACCAGCAGCGTACAGCCA	2147	390	6	20	1	17	12	10	45	3	3	74	9	33	12	14	23	13	8	13	76	7	14	1	5	24	0	0	2	1	3	89	0	3	10	2	1	1	1	3	0	7	1	2	4	1	0
Aurkc	KY009846	TTTGTTCTCACAGATAATAC	1470	600	84	172	397	75	150	211	2018	2735	68	11	41	239	7	5090	78	1301	2785	130	10	381	417	6	6	1313	68	7	71	5453	8951	12	19	632	2	16	371	7957	1228	6	0	119	179	92	7	8	31
Aurkc	MGLibA_06030	TCACCGTGGCTGTACGCTGC	8474	2268	33	95	75	187	91	134	432	84	366	552	102	231	152	181	140	1916	73	635	289	889	182	298	247	69	25	436	82	8	148	39	7	743	126	48	102	27	27	44	3	27	195	467	995	280	643
Aurkc	MGLibA_06031	CACTCACCTGGTTGAGGTGC	3660	1113	46	772	34	34	70	8	159	20	59	0	30	24	11	21	5	67	131	15	209	5	5	6	0	449	4	0	6	2	0	4	3	1	3	0	2	9	99	3	2	0	13	9	2	1	16
Aurkc	MGLibA_06032	TTCCTTAGCTACTGGCCAGA	2945	523	39	14	1419	103	26	2	1126	5	27	9	6	9	33	13	66	7	7	41	39	20	52	160	265	41	15	736	2	1	4	1	137	139	8	5	15	2	8	0	4	10	14	10	110	20	16
Aurkc	MGLibB_06030	AGGCTTACTGTAGGTGTGCC	2045	395	42	188	146	158	35	9	53	171	10	181	12	59	365	83	3	271	44	291	34	89	54	244	633	32	158	1112	1063	27	3	16	32	104	97	17	1	95	22	243	5	9	27	231	532	17	403
Aurkc	MGLibB_06031	ACCATCAATGACTTTGAAAT	1812	524	89	13	57	391	146	2	1	7	25	1	10	1	3	1	15	46	2	5	10	1	4	184	350	78	12	0	2	6	7	2	0	0	9	3	1	0	7	3	0	4	3	8	3	0	1
Aurkc	MGLibB_06032	ACTACTTCTATGATGACACT	3184	871	7	221	34	23	58	1	67	14	28	4	7	11	18	51	13	5	5	2	12	2	13	19	9	37	16	0	24	7	7	1	0	0	2	3	14	4	2	1	0	8	1	5	1	3	3
B2m	KY010010	TCACGCCACCCACCGGAGAA	3054	410	45	11	151	35	2	15	41	118	2645	3615	100	38	3	74	9	518	98	3756	7	36	263	2	5	62	5	6	33	440	3499	1798	56	260	1695	23	510	555	49	817	3753	278	82	208	7144	17	71
B2m	KY010011	CACGCCACCCACCGGAGAAT	3389	667	14	71	17	14	15	89	10	95	62	336	2780	24	66	134	30	1	10	1173	42	11	316	39	5	1350	100	35	133	16040	410	89	55	5578	4	36	16	15	93	4	93	792	54	219	690	17	139
B2m	KY010012	TTCGGCTTCCCATTCTCCGG	9090	1493	106	5780	123	2839	1864	285	188	43	301	1043	1972	506	1140	932	360	128	253	212	58	2973	264	5106	61	142	1049	19	505	215	35	1374	1902	107	460	2968	73	88	13552	348	16617	1965	1082	3822	29	81	365
B2m	KY010013	GGATTTCAATGTGAGGCGGG	1418	510	7	3	15	124	258	0	3	0	23	2	198	5	6	3	43	63	4	4	47	6	10	5	8	7	1	0	1	1	2	2	37	0	32	0	0	3	6	35	2	4	24	18	774	4	4
B2m	MGLibA_06111	AGTATACTCACGCCACCCAC	3787	456	4	0	1	4	732	40	1	8	47	16	14	1	130	1	77	15	4	5	16	26	5	54	1	9	2	1	4	64	12	1	0	2	448	12	0	1	20	420	16	183	47	190	3	35	3
B2m	MGLibA_06112	AGTCGTCAGCATGGCTCGCT	2458	1114	60	138	43	619	73	178	558	15	71	73	139	633	1429	249	57	123	362	2129	47	280	182	338	60	160	433	5775	216	124	288	59	203	1409	501	783	90	334	192	1688	844	923	1024	197	446	762	646
B2m	MGLibA_06113	CCGAGCCCAAGACCGTCTAC	4111	1070	49	145	142	373	927	1738	928	385	657	91	724	116	14	187	84	117	297	17	751	33	47	1296	34	343	180	21	20	2762	739	91	3705	28	410	515	138	43	501	551	43	1254	6552	596	120	52	379
B2m	MGLibB_06111	CTGGTGCTTGTCTCACTGAC	4200	1703	8256	2007	507	448	363	99	1345	793	875	1213	1182	1082	1685	3697	47	177	226	96	465	561	258	1372	2139	2207	7463	18633	650	414	14066	4973	5113	2508	309	11129	102	3830	16370	1126	673	9401	13166	33946	4268	2037	1402
B2m	MGLibB_06112	ACGTAGCAGTTCAGTATGTT	4413	1226	4	62	98	16	101	69	8	88	70	35	1226	12	20	26	40	195	677	5	7	11	40	20	20	27	13	143	70	4	4	0	4	18	131	14	47	0	36	101	152	14	36	14	130	271	13
B2m	MGLibB_06113	CGTATGTATCAGTCTCAGTG	4847	738	29	1035	5	1592	30	141	520	78	183	9	46	2	1	14	91	231	52	79	11	160	17	2615	243	149	81	18	2242	615	53	40	55	1059	1347	54	2416	145	33	658	29	1493	150	175	490	321	27
Bahcc1	KY010265	CCCTCTGAGCCGGCCTACCG	3639	542	6	351	9	1104	599	193	22073	19	115	14	2	91	8	1108	4	49	125	22	13	569	25471	56	87	5	66	8372	25	3	7	0	559	1	1	48	0	6	0	60	0	350	902	3	99	7	11
Bahcc1	KY010266	GAAGGCTCCGTTCGTGGGCC	2735	768	8	28	8	50	83	172	3	0	42	28	1	5	1	0	1	2	9	4	5	9	3	48	10	11	1	4	248	0	35	1	0	14	4	2	1	112	0	3	0	2	2	14	17	5	9
Bahcc1	KY010267	AGGCAGCCTCGATGCGGTCC	3785	865	11	172	15	33	547	26	106	314	15	20	91	36	279	32	42	36	65	71	212	12	5	16	4	20	2	13	0	10	12	2	13	19	14	4	25	390	67	216	24	5	4	20	3	1	1
Bahcc1	KY010268	CCCGTCTGTACACCCCACGG	5015	865	30	95	404	308	22	64	45	22	56	3	14	17	45	54	30	7	30	25	144	15	8	9	67	214	2	4	13	4	6	6	8	6	2	40	35	6	11	18	98	6	10	16	10	31	227
Bahcc1	KY010269	CCCAGGGAGGAACGTCCTTG	1986	498	0	3	12	11	0	10	1	12	19	0	7	2	0	2	23	7	0	2	2	355	8	3	3	2	0	0	0	110	0	0	0	5	0	0	0	33	0	0	0	1	2	1	2	0	0
Bahcc1	MGLibA_06492	CGAGACGAAACGCAAGTCCG	2456	430	0	52	10	3	0	8	1	1	4	1	5	1	1518	2	1	3	0	49	0	3	6	0	6	12	0	11	3	34	28	2	0	0	0	0	1	1	729	1	0	0	4	4	1	4	1
Bahcc1	MGLibA_06493	ACCGACCATGGTGCACCCTA	4001	647	9	1	2	0	93	275	8	19	38	25	19	115	50	18	16	3	36	8	11	9	2	79	0	3	2	3	1	124	3	11	5	12	7	2	0	2	5	3	184	1	4	3	1	3	2
Bahcc1	MGLibA_06494	TGTAACAGCAGCTCACGTCC	3690	818	7	40	32	674	17	4	34	101	1	169	3	1	40	13	19	14	11	6	6	24	13	10	14	38	2	13	35	3	4	777	25	5	4	24	6	243	0	1	0	185	1	6	96	13	2
Bahcc1	MGLibB_06492	TCCTCGGTAGGCCGGCTCAG	4188	1548	85	227	136	452	79	59	100	75	268	74	458	65	223	53	117	64	82	242	24	89	87	35	700	85	16	9	22	14	9	242	7	387	22	31	30	17	78	182	2518	31	56	61	10	30	1277
Bahcc1	MGLibB_06493	TCTAGCGCATGGCTGGCACG	2959	482	4	339	1	28	5	2	48	2	28	53	224	22	9	76	11	5	15	1	22	127	3	15	101	232	2	0	2	2	3	0	0	29	6	1	0	0	5	2	0	0	0	9	11	2	4
Bahcc1	MGLibB_06494	GATCCAAGTGGCTCACGGGT	1242	103	54	34	1	2	9	0	10	0	8	14	2	51	0	1	3	8	2	1	4	0	3	1	0	0	0	0	0	0	0	0	0	0	0	0	4	10	0	0	0	0	0	0	0	0	1
Bahd1	KY010270	CCCATTGCGCAAACGTTCAC	2370	567	68	12	2	181	41	21	95	433	0	260	158	182	0	14	26	11	6	20	6	1	48	133	10	34	4	1	3	58	5	7	2	5	13	3	1	20	21	0	0	0	32	3	188	2	4
Bahd1	KY010271	GAGTCCGACCTCGTCCAGTG	4047	1455	7	10	41	10	82	21	33	2	16	3	1	3	14	22	6	17	6	14	8	5	35	16	1	0	2	1	3	7	35	0	0	3	5	1	1	1	0	0	1	3	3	10	8	15	291
Bahd1	KY010272	GCGGGGACCCTCACCGTAGC	1784	592	59	32	319	48	57	50	104	11	23	38	179	223	4	29	43	11	22	16	61	15245	7	10	57	7	264	5	0	34	3	160	0	4	8	12	41	4	3	107	0	42	3	50	23	6	1
Bahd1	KY010273	TGAGCACGAGAAGGTCGAAG	1708	610	99	14	82	1586	462	1709	67	74	63	735	105	182	433	398	70	187	174	65	16	15	17	298	89	151	4	2	21	330	3	12	24	836	524	13	161	67	73	13	339	66	76	30	36	58	17
Bahd1	KY010274	GAGGCAGGTTGGGGCGCAAC	2736	760	14	1690	198	71	29	31	754	45	217	42	59	14	78	77	5	353	9	7	23	51	203	12	11	15	2	0	16	25	4	5	3	12	13	3	4	71	38	3	19	0	8	3	4	3	0
Bahd1	MGLibA_06495	CCGAGATGGGCGTCTGAAGA	1553	619	55	2342	471	710	914	233	57	311	321	9	315	8481	85	104	637	32	22	198	1196	563	6766	1688	110	20	31	2	20	5	13	2	45	3	5	8	59	5	0	1	0	2	52	164	6	3	2
Bahd1	MGLibA_06496	TGCCATCCGAAAGAGTTACC	3550	857	89	251	133	30	288	23	58	11	161	143	7	4396	22	6	63	3	5	7	8	32	69	691	16	24	10	8	13	3	42	4	5	8	54	124	21	1	1	2	3	1	92	13	3	6	11
Bahd1	MGLibA_06497	TTACAGGCCTGAGCACTTAC	5023	1383	2409	479	18	88	74	74	322	32	218	493	19	106	16	267	23	107	115	386	80	103	239	142	64	153	332	9	162	8	12	45	30	16	31	217	133	296	62	23	3	53	29	178	27	5	10
Bahd1	MGLibB_06495	CAGAGCGCCAAGCCTCCGAG	1651	241	3	91	2	91	30	37	12	184	37	0	2	7	61	6	5	1	4	3	1	0	4	6	3	44	0	0	8	0	2	20	5	10	2	0	0	5	0	0	0	1	0	3	2	1	4
Bahd1	MGLibB_06496	AAAGACGTCTACACCTTATG	1895	199	25	143	0	1	26	61	11	57	10	25	9	25	9	3	3	0	63	14	519	2126	9	13	12	8	0	0	1	0	0	4	97	22	2668	1	13	10	0	75	0	7	0	3	189	3	1
Bahd1	MGLibB_06497	ATAGCACTTCTCTTCAATGC	3689	959	14	20	24	7	41	10	26	46	15	1995	72	119	263	10	611	1183	9	10	8	116	1261	14	25	50	15	2	26	114	8	2	14	3	0	11	24	18	13	12	1	23	16	4	38	33	13
Baz1a	KY010378	TCTGCTCCTTTTATGCGATC	5333	1812	11362	20151	747	8042	7427	2062	3238	9582	2567	6796	723	9591	4846	5352	1084	1535	745	731	942	614	687	1975	4005	3274	3096	900	2288	24746	2191	246	1223	1498	453	398	543	467	2435	4156	1054	249	3503	1123	225	5047	102
Baz1a	KY010379	TTATGTTGATGTGTTGCGAC	3271	617	1	28	87	2	0	2	22	2	32	6	32	23	124	18	0	2	47	5	5	3	3	4	14	14	0	0	0	7	2	311	3	4	3	2	9	0	6	1	1	4	5	9	1	8	4
Baz1a	KY010380	CTTCCTCGTCGCCTGTTAGC	7264	1753	15	105	224	211	3784	12	249	6	54	23	104	36	44	35	33	10	61	12	33	69	48	37	19	54	0	0	13	4	3	3	2	6	17	4	11	15	3	1	6	284	17	22	30	8	7
Baz1a	KY010381	CCTCCCAAACGAATATCTTT	2207	923	12	21	27	20	41	8	82	118	125	14	76	65	60	5	36	10	36	4	10	10	27	389	617	304	3	1	1	0	10	60	2	2	11	2	14	2	32	0	3	0	10	7	16	1	29
Baz1a	KY010382	GCTTCCTGATACGTCAGTCC	5006	1507	28	4327	78	2167	39	44	16	98	22	479	137	110	104	3230	843	542	20	347	22	63	30	7	101	429	190	39	37	17	56	508	10	2	77	23	291	11	12	3	165	12	5	423	95	9	29
Baz1a	MGLibA_06570	TGTGCCGTGACGGGTAGACC	5303	1332	487	396	102	23	1570	205	29	53	623	90	3163	129	403	74	82	22	416	153	211	142	1568	499	256	33	35	34	1039	35	3	34	11	24	72	22	20	116	468	40	47	61	1124	47	11	11	247
Baz1a	MGLibA_06571	GCAAGCGTGAACGACGAGTA	1755	234	1	4	0	5	3	1	3	4	1	1	0	1	187	4	1	5	0	8	6	7	0	1	1	92	13	5	0	0	0	0	0	0	1	4	10	0	1	4	1	0	0	0	1	1	0
Baz1a	MGLibA_06572	CATCAGCGACAGTGACGACT	3341	766	52	25	140	136	17	91	8	720	14	9	499	27	1	212	238	370	33	108	6	3	155	180	426	20	1	2	1	12	0	0	36	0	17	3	20	8	10	2	3	5	45	15	7	106	15
Baz1a	MGLibB_06570	GCAAAACCATTCTGATGTAA	1635	259	1	0	9	1	0	2	2	0	0	0	7	1	3	0	0	3	0	2	52	2	12	4	2	3	0	0	2	0	0	3	0	1	13	0	2	0	0	1	0	267	0	8	1	0	1
Baz1a	MGLibB_06571	AACCCTGTATCTGAATAATA	1279	279	0	3	12	0	20	16	2	5	104	1	0	0	72	0	0	0	6	7	0	0	18	4	3	39	2	0	5	0	2	0	5	0	7	0	0	0	0	0	8	0	0	0	11	0	3
Baz1a	MGLibB_06572	CAACACTGTGAAGCACAAGA	1283	329	86	344	0	0	4	3	11	0	1	11	3	11	287	0	0	0	158	0	2	14	6	1	1	5	0	0	3	0	16	23	4	2	9	4	157	15	26	1	3	0	15	4	4	0	0
Baz1b	KY010383	CATGACCAAATATGCCGTGG	2728	374	1	2	6	0	15	10	43	2	11	10	3	6	48	1	2	7	78	1069	14	3099	0	43	3	3	0	0	0	0	0	46	0	2	1	1	0	0	18	1	0	1	0	1	1	4	0
Baz1b	KY010385	AGCAGACAGCTTGATTCGAA	1236	216	1	0	1	0	0	0	0	0	0	3	5	6	0	1	23	0	12	2	71	1	2	7	1	3	0	0	0	0	3	0	0	3	0	57	0	1	0	4	0	3	3	0	2	0	0
Baz1b	KY010386	AGATACTTCGATACTTTATT	2110	446	1	3	0	27	9	0	138	1	26	1	2	0	20	1	17	8	11	8	0	6	2	18	8	8	0	9	661	0	33	1	1	2	0	26	24	4	11	0	1	50	3	16	8	1	0
Baz1b	KY010387	CACTTGGAGAAGTCGTTAAA	1355	434	13	358	34	2	147	466	59	3	1061	50	5	104	1	86	426	1425	55	81	47	21	28	205	27	137	3	0	2	2	3	5	119	4	15	0	3	0	1	3	1100	62	338	2	73	2	0
Baz1b	MGLibA_06573	GACTAGATGACAGAGCGCGT	1055	222	0	13	3	7	9	5	29	31	0	0	0	5	44	1	180	11	3	12	15	1	94	24	2825	3	2	0	0	2	3	1	0	1	0	0	0	1	1	0	0	0	1	0	0	1	13
Baz1b	MGLibA_06574	GATCATGACCAAATATGCCG	1227	101	0	0	1	5	0	1	1	0	1	1	9	4	0	0	7	0	3	6	25	0	23	10	1	23	0	0	0	0	0	0	0	0	0	1	0	1	0	0	0	0	0	0	0	0	0
Baz1b	MGLibA_06575	AGAGTCGACAAGCTTCTCTA	1238	234	27	5	1	119	7	4	0	4	204	164	41	5	5	26	2	2	6	9	247	3	20	9	4	2	0	0	4	2	0	0	0	15	10	16	21	0	0	0	0	1	3	17	0	1	0
Baz1b	MGLibB_06573	AAAGATACAGTGAACGCATT	1286	312	1	1	34	5	0	7	76	0	4	19	0	20	0	53	0	0	20	2	0	2	71	1	18	10	1	0	0	2	0	0	2	0	0	0	1	3	2	0	0	1	0	4	3	3	1
Baz1b	MGLibB_06574	GATAGTGAAGATTCATCCTT	1256	404	72	39	71	93	33	3	92	2	5	889	1	121	12	234	26	215	20	34	4017	7	1148	13	39	14	0	0	2	2	1	5	1	4	9	2	7	167	8	1	2	2	0	1	3	20	3
Baz1b	MGLibB_06575	TGCGTTCACTGTATCTTTCC	7145	2205	77	295	408	491	468	620	263	42	1832	7953	1806	317	114	307	141	121	496	66	364	39	398	403	101	70	752	4626	38	120	231	159	5	185	1278	9	68	76	432	19	12	104	145	637	23	57	46
Baz2a	KY010388	GGGGGACAATACCCGCTCAA	2	204	347	2	115	6	12	338	32302	1159	101	21	19	10	2	2	42	0	5	11	12	13	12	133	244	29	0	4	52	19	753	1	17	7	2	2	0	4	0	9	0	0	189	6	1	0	0
Baz2a	KY010389	CCCGCTCAACGGTATCCTTG	4699	2193	1245	5976	8812	6343	5432	2342	6422	4640	13564	1555	6629	1458	13853	4191	5652	4051	6976	3594	1212	2484	2789	1175	5019	15098	8469	6667	30237	6964	4055	11287	16471	1605	2721	1332	698	3244	1305	483	1749	6411	11439	2045	6288	1456	5858
Baz2a	KY010390	CACAACACTAATCTTCGAGC	1598	154	0	3	0	13	0	1	0	8	1	54	9	0	2	1	0	0	1	0	1	0	6	6	0	1	0	0	1	0	0	1	0	0	1	1	0	0	0	0	0	0	2	1	2	0	2
Baz2a	KY010391	GACAGTCGTAGGCCACGTTA	2661	930	18	132	3117	251	105	25	51	150	227	393	172	1291	383	186	99	178	202	38	50	76	49	3196	194	211	0	6	22	2	13	121	4	27	95	20	48	28	158	17	29	464	21	70	26	12	855
Baz2a	MGLibA_06576	TCTCGATCAGCACGCGCTTT	6454	2006	277	3389	1062	1038	1283	459	256	985	5427	456	815	3861	566	5957	1575	8524	193	594	117	1658	10945	1437	585	1431	305	149	9833	9088	48	142	1193	678	1138	108	1654	831	266	199	63	47	109	70	151	149	219
Baz2a	MGLibA_06577	GGGGCTTAACTTCGATTCAC	1214	247	0	31	2	333	5	17	3	0	8	3	0	1	4	1104	0	0	10	1	3	15	1	75	3	0	0	1	2	8	4	0	1	2	0	0	0	0	0	46	0	0	19	14	3	1	6
Baz2a	MGLibA_06578	AAGGTTGTCGGTTGCCCCCA	4059	1003	729	38	134	250	10	13	10	20	49	9	293	42	238	46	26	427	58	40	58	144	41	15	16	132	6	4	4	4	6	49	0	7	119	19	88	4	5	18	241	11	43	49	16	3	8
Baz2a	MGLibB_06576	GCTGATCGAGAAGAGACGAC	1219	362	10	153	44	6	275	16	141	5	108	14	1625	1	10	4	38	29	15	11	80	4	198	7	21	46	0	0	0	0	0	14	4	24	4	15	0	16	1	4	18	0	14	4	0	1	4
Baz2a	MGLibB_06577	ACACCAAGAAGTCTCCGTCC	2476	522	56	146	31	16	16	26	3	2	38	806	113	39	63	6	8	6	17	8	236	9	28	6	13	34	2	3	9	25	5	4	26	37	104	6	15	6072	1	2	771	9	10	29	11	77	37
Baz2a	MGLibB_06578	AAGACAGACTCCCCTAAGAC	1151	189	1	135	5	1	22	16	4	3	100	120	59	31	10	131	15	11	10	147	3	3	793	1	25	143	22	0	7	10	50	396	11	3	9	62	1	8	2	1	536	5	13	33	588	13	1
Baz2b	KY010392	GTTCCTCTCAACAGCGATAA	1159	205	0	34	1	4	0	2	0	0	0	0	0	0	1	7	1	0	1	4	1	0	22	4	0	22	5	0	0	0	0	0	2	4	1	1	0	2	1	0	0	0	0	1	1	0	0
Baz2b	KY010393	GGATGTCATTCCTCGTATCA	3010	1132	11	111	32	46	19	22	46	18	58	38	123	44	16121	336	450	256	64	682	98	13	1477	237	76	165	15	0	36	13	5	9	1	3	36	0	2	50	149	19	98	50	272	121	4	6	12
Baz2b	KY010394	GCACCATCACCCCCATCCGG	3919	789	3	5	8	310	9	11	57	5	12	13	124	63	182	11	57	14	11	9	247	9	13	170	3	57	2	2	7	3	5	6	2	4	1024	1	7	11	47	21	8	11	8	3	7	0	10
Baz2b	KY010395	CCGTTTGGATCGCAATTCAC	4665	1080	44	3934	21	749	34	90	38	750	11	396	52	28	51	32	100	27	136	14	36	185	49403	209	69	238	1	8	825	9	22	0	5	77	699	2	9	1	116	7	41	753	39	11	6	86	23
Baz2b	MGLibA_06579	ACGATTCGTCATTCCATTCG	4288	934	100	30	41	353	9	6	21	20	131	57	72	9	20	22	39	85	15	19	7	45	7	217	35	103	7	0	62	5	35	58	6	9	207	10	1	1	10	7	0	89	24	14	11	4	15
Baz2b	MGLibA_06580	TCGTCAGACACCTCGAGTGA	2912	578	24	3	41	9	23	48	25	3	19	10	12	1	204	5	39	4	48	38	4	38	384	12	30	217	1	0	3	3	21	4	1	9	14	6	13	0	8	0	10	2	29	2	3	5	2
Baz2b	MGLibA_06581	GACGAATCGTGATTCTGGGC	1918	161	0	13	22	3	0	0	3	1	0	0	2	20	5	1	1	88	2	0	1	0	10	0	3	1	19615	238	4	34	0	0	1	0	0	0	3	3	0	1	0	0	0	1	0	0	0
Baz2b	MGLibB_06579	GCTGCTAATGCCTTCACTCG	4055	945	46	26	2	7	111	14	13	72	6	22	20	1	14	1659	11	42	25	16	91	10	21	33	20	7	26	0	6	0	87	0	8	3	19	11	2	2	0	1	0	0	15	4	4	2	0
Baz2b	MGLibB_06580	AGCCGACAGAATCAAAGATA	542	141	1	0	0	0	1	2	2	11	233	1	0	9	0	0	0	54	0	1	1	0	0	1	5	2	0	0	0	0	0	0	0	0	0	0	0	4	0	0	0	0	9	0	0	0	0
Baz2b	MGLibB_06581	GTATCACCTGACTCAGTGTC	4428	1011	2	39	40	9	13	6	185	2	9	11	13	2	21	9	28	34	6	26	10	2	27	11	25	9	6	7	4	0	54	1	1	27	5	2	0	3	5	5	1	3	2	1	7	1	3
Bcor	KY011056	CACGAGGAACTCCGCTGTTG	3991	1131	10	71	998	38	97	129	11	33	9	56	74	21	22	34	49	607	40	47	23	28	106	181	15	25	417	23	0	107	19	32	0	50	6	21	5	13	9	173	73	60	0	8	7	3	8
Bcor	KY011057	GGATGTAGAGAACTCGCTAT	1630	438	9169	6581	238	25980	9754	26970	38046	21148	246	3606	1223	148	562	2931	34012	2029	7396	415	326	126	237	7421	24189	1927	110	61	697	58493	87	6884	264	1872	1422	983	438	1137	53	189	17	65	118	2265	49	54	35
Bcor	KY011058	CTGCCAGGCCATCGATCCGA	4943	1870	185	45	109	175	301	109	109	78	31	36	593	724	105	206	111	1456	122	1313	22	107	180	697	201	43	2	17	778	64	37	535	35	1078	129	5	14	31	4	2	2	18	7	850	85	667	196
Bcor	KY011059	AGGACCCAACCCTCCGTAGC	2331	579	0	10	153	11	21	6	51	3	71	11	14	837	71	70	8	109	2	5	3	14	43	1713	4	6	0	0	9	1	4	0	5	3	17	0	9	3	4	6	0	2	9	2	0	2	7
Bcor	MGLibA_06753	GATGAGGCCGAATCCAACGA	1294	897	3059	590	32001	78	125	2214	7708	3534	1723	336	859	7398	857	2115	736	45	102	2261	175	130	9509	7137	715	63	37	1	115	24	39	66	10	10	85	124	578	377	8	5	5	14	46	30	22	16	12
Bcor	MGLibA_06754	CTTACGGGCTGCATACGAGC	2296	647	28	148	587	83	5	5	11	18	27	715	5	7	250	11	50	3222	95	237	15	44	400	31	64	41	3	0	27	6	112	2	2	4	2045	28	24	3	12	1	5	0	4	16	16	9	10
Bcor	MGLibA_06755	CGACGCTTCAAAAGCCAGGC	1656	373	1	3	1	0	0	26	60	0	27	3	10	0	8	56	0	5	123	29	6	14	2	3	9	0	0	19	0	0	2	2	0	1	1	0	0	0	3	0	3	0	195	1	1	0	1
Bcor	MGLibB_06753	CTGTGAACGTTCCCATACAG	3202	743	3	17	633	8	34	12	3	113	74	12	7	58	377	22	14	573	1	2	11	6	5	2	0	13	0	6	4	1	5	19	0	27	1	473	4	6	0	16	0	20	239	0	17	2	20
Bcor	MGLibB_06754	GAAGCGTCGCCATCATTCAC	3576	847	108	88	162	3288	455	7	57	17	165	33	198	13	168	307	167	1522	1481	123	180	3264	72	103	13	669	25	3	7	126	1	2	81	11	91	2	6	4	45	2	1	8	12	4	18	1	62
Bcor	MGLibB_06755	ACAGCTGGATGAACAGCGAG	869	404	2	1	5	15	1	2	5	5	7	13	14	0	1	1	13	89	1	1	16	3	2	1	21	6	1	1	14	1	0	0	2	10	1	0	0	1	0	1	0	2	7	2	1	0	0
Bmi1	KY011379	ACAAATAGGACAATACTTGC	1010	170	0	15	0	0	0	0	1	7	0	0	1	0	0	0	1	0	3	1	2	1	2	19	0	2	0	0	0	0	0	0	1	0	3	0	0	0	3	0	0	0	3	2	0	0	0
Bmi1	KY011380	ACTGTCTTTATAGCTGCCAA	1781	424	7	16	58	83	12	63	16	1	1527	28	89	87	6	71	506	161	1331	40	97	46	55	42	146	104	1	0	5	2	1612	27	9	505	1470	1	5	10	68	67	15	31	3	9	47	3130	3
Bmi1	KY011381	TTCTCTCTCTTAGATTGGAT	3479	555	28	709	603	180	54	152	178	18	27	25	391	21	68	45	188	58	29	8	10	58	70	26	8	64	5	7	66	3	33	20	56	51	49	5	15	10	1	2	26	8	2	24	27	7	5
Bmi1	MGLibA_06966	GCAGCTCACCCGTCAGCTGA	3178	724	1388	692	64	160	78	1708	42	151	179	168	37	14436	7	4	257	35	14	25	15	10	138	9	7	14	5	0	9	3	2	5	2	5	12	70	32	9	151	9	51	0	2	1	7	233	4
Bmi1	MGLibA_06967	AACATGTATTGTACGTTACT	2805	823	1	6	35	60	76	1	54	39	32	1	109	94	102	60	73	142	29	14	19	13	347	158	108	4	83	0	4	753	3	2	36	10	4	5	1	3	12	12	0	5	35	5448	1	10	6
Bmi1	MGLibA_06968	GCACTTCCTACCTTATGTTC	5231	786	89	37	64	54	40	11	45	53	721	38	153	182	230	13	8	41	87	135	209	22	68	163	28	10	4	4	14	16	7	62	95	25	25	10	4	17	11	17	3	5	9	17	8	7	20
Bmi1	MGLibB_06966	AATGGCTCCAATGAAGACCG	1202	243	1	0	0	2	2	0	0	0	0	0	3	47	31	0	116	4	0	3	1	0	0	0	1	35	0	0	4	0	0	3	0	0	0	0	0	0	1	1	0	0	2	4	5	0	0
Bmi1	MGLibB_06967	TTGAGTTCTTTGATCAGAGC	2084	392	4	21	7	2	4	12	4	2	8	24	14	31	4	0	4	19	10	1	3	1	2	9	4	69	6	0	0	2	1	0	1	1	9	0	2	3	5	1	0	2	1	2	1	0	0
Bmi1	MGLibB_06968	CAAAATTTACCATCAGCTGA	1511	222	1	16	0	143	27	5	0	3	0	3	1	4	14	0	0	60	1	6	1	5	8	16	0	2	1	0	13	0	0	10	0	70	1	0	2	5	1	2	105	3	0	3	1	1	0
Bptf	KY011619	CAAAAGCAGTGGACTTCGAT	1616	239	1	90	32	5	2	1	0	8	0	0	1	4	36	1	17	1	0	2	0	1	1	0	0	0	0	3	9	0	0	1	0	0	5	1	0	56	3	67	0	25	0	1	0	1	0
Bptf	KY011621	TTTGTTCTCCACTGGTCCGT	10916	1198	9	41	1436	96	7	20	45	1	4539	2	86	28	58	2	6	71	461	5	14	18	17	16	24	74	0	4	21	23	3	5	35	3	3	2	2	27	1	2	0	5	18	43	6	6	71
Bptf	KY011622	ACCTGCCCCGACTGCTGCCG	6663	609	0	22	9	18	7	3	16	4	7	0	14	1	104	19	5	15	2	10	5	346	45	8	29	43	44	6	33	0	1	4	0	73	25	0	2	8	0	0	0	1	1	5	4	10	3
Bptf	KY011623	GACCCAGGATTCCGAGGACG	1394	228	0	0	1	5	1	101	51	0	1	9	2	2	2	0	0	0	0	0	0	2	164	1	0	0	0	0	0	4	0	0	0	0	0	0	0	178	0	0	0	15	3	4	389	0	9
Bptf	MGLibA_07131	TACGTTCGACACGAACCTAT	3275	761	6	92	10	44	152	2	23	5	7	8	124	34	1244	14	5	39	3	25	557	57	36	3	23	8	18	2	12	559	2	6	4	3	7	1	2	6	56	4	0	0	10	19	6	7	4
Bptf	MGLibA_07132	AATAGGTTCGTGTCGAACGT	2225	99	0	0	0	2	0	0	0	75	0	0	0	0	0	0	0	0	0	0	0	0	4	0	0	3	1	0	0	0	0	0	0	8	0	0	0	0	0	0	0	0	0	0	1	1	1
Bptf	MGLibA_07133	GACCTGACCAACAAGGCTCG	1336	65	0	0	1	0	0	0	4	0	1	0	0	2	1	0	1	0	0	0	0	0	0	1	0	0	0	0	0	0	0	0	0	0	0	0	0	0	0	0	1	0	0	1	0	0	0
Bptf	MGLibB_07131	AGTCTATTAGCTCTGCTAAC	2102	538	0	11	12	363	4	74	4	6	724	60	8	152	19	76	140	19	81	75	10	104	743	210	7	563	0	1	27	14	3	0	0	32	3	2	41	163	3	1	0	1	15	1	2	1	4
Bptf	MGLibB_07132	CTCGTATCATCACCAGACTG	2972	63	0	0	0	0	0	0	0	9	0	0	0	0	0	30	1	0	1	0	0	0	0	0	1	4	0	0	0	0	0	0	0	0	0	0	0	12	0	0	0	1	0	0	0	1	0
Bptf	MGLibB_07133	GGACTCGGAAACTTCTCCAT	2385	246	3	7	33	11	21	26	794	0	0	1	5	3	0	2	3	145	1	30	7	10	230	1807	5	39	8	1	1	0	0	17	1	0	46	0	2	111	1	309	0	0	0	3	1	1	28
Braf	KY011624	ACCAACTGATGCGCTGTCTT	3923	1036	83	41	459	427	13	276	26	39	50	163	30	350	148	11	142	243	3122	13	111	20	40	38	789	61	1	6	36	3	0	42	2	7	1	0	4	1	5	0	4	0	3	15	5	2	76
Braf	KY011625	AAGATCATCGCAATCAGTTT	2782	831	25	27	205	33	62	12	7	12	5	112	4	6	486	14	124	335	4	132	3	5	13	17	105	63	3	2	28	4	27	13	16	55	54	1	8	5	1444	33	1	0	3	1	6	4	11
Braf	KY011627	GGCCGGGTCCGCAGCCGAAG	1861	497	22	89	50	0	88	48	62	254	17	27	76	335	4	46	16	2020	31	12	76	72	5	27	56	46	167	2	19	127	10	23	95	916	6	1472	133	20	5360	68	17	279	20	19	6	361	23
Braf	MGLibA_07134	TCATAGGTACCCGCAAGATG	2178	502	3	14	1326	914	3	2	310	2	1	13	0	127	4	738	74	17	16	28	11	134	0	13	40	11	0	0	0	5	1	2	1	228	3	0	6	0	0	0	0	48	0	8	13	0	1
Braf	MGLibA_07135	GAGGCCCTATTGGACAAATT	1493	791	5	55	32	21	2	32	1	0	15	25	0	3	3	15	10	8	9	1	104	4	7	3	7	12	0	0	0	0	0	2	0	0	9	3	1	2	9	6	14	0	2	13	2	0	4
Braf	MGLibA_07136	GTTGTTCCGTGATGCATCTG	5765	2219	349	751	345	2742	583	174	109	51	231	7924	309	802	125	346	153	343	1566	540	591	238	504	491	38005	542	232	80	294	3587	167	233	57	342	313	98	56	215	27	27	19	405	130	564	40	36	13
Braf	MGLibB_07134	GCAAATGATTAAGTTGACAC	1057	509	11	0	0	2	0	1	51	7	4	5	46	4	44	1	0	1	2	2	1	0	8	2	58	9	1	15	0	1	0	0	3	0	0	1	1	1	0	1	0	0	1	3	4	0	2
Braf	MGLibB_07135	TCTTCCTGCCCAACAAACAG	2994	1215	39	10	77	14	15	180	7	22	6	2	105	190	58	86	136	192	3	14	38	17	24	1047	37	12	15	4	27	0	2	55	6	17	1	2	12	3	4	5	0	1	18	2	30	4	25
Braf	MGLibB_07136	CTTGCTGGTGTACTCTTCAT	4975	1906	198	4145	213	790	116	1329	394	49	3430	275	3832	204	377	443	704	168	176	208	255	489	3373	167	265	199	131	20	326	115	31	32	181	51	60	65	12	402	44	74	30	22	135	36	15	14	307
Brca1	KY011632	AGGTTAAGCGCGTGTCTCAA	3967	458	0	1	66	6	23	8	11	1	66	2	13	1754	73	16	19	295	21	3	12	13	59	7	1	1125	0	0	0	2	6	42	2	15	1	4	37	9	1	0	0	54	15	7	12	0	4
Brca1	KY011633	AACCCCAAGGAACTCGTCCA	4489	644	7	5	123	1	8	113	1	1	46	0	179	0	2	70	18	14	21	48	32	1	5	9	4	36	0	0	1	2	0	0	5	2	109	0	8	1	2	0	21	1	0	5	0	0	0
Brca1	KY011634	AAGTTTCAAACGAAGTGGAT	1533	609	37	15	67	13	698	1071	66	58	41	9	39	19	556	21	60	121	90	1508	392	779	13	166	88	18	2	1	7	155	3097	1225	56	38	7	1236	267	9	153	189	5036	81	443	677	6	9	51
Brca1	KY011635	GGCATTTCCAGGTTCGACCT	6237	675	15	17	139	123	21	22	15	1	399	94	102	21	29	61	42	48	17	391	5	244	27	60	16	19	0	7	194	2	10	3	0	21	37	5	22	2	43	53	45	0	60	210	2	0	264
Brca1	KY011636	GCGTCGATCATCCAGAGCGT	4761	576	9	24	3	3	3	0	7	6	6	22	2	14	1918	13	6	0	12	8	10	52	37	14	87	9	0	0	0	159	1	0	0	8	3	2	2	16	2	11	1	0	0	5	23	0	175
Brca1	MGLibA_07143	GGCGTCGATCATCCAGAGCG	3974	874	77	89	1021	263	313	92	758	75	3266	211	81	75	1057	244	215	589	26	105	870	310	1086	79	213	72	3	4	6	78	68	8	0	7	15	10	7	6	5	7	329	6	2	4	16	1	30
Brca1	MGLibA_07144	GCTACCGGAACCGTGTCAGA	4711	702	6	39	3	11	43	5	18	40	3	1	17	9	7	5	37	32	2	22	5	5	42	32	379	22	0	1	1	0	6	2	6	0	0	2	0	0	1	23	89	2	3	3	2	0	0
Brca1	MGLibA_07145	GTTATCTCATTCTTACACAA	3367	293	0	1	1	2	0	2	192	3	42	1	0	20	7	2	7	374	1	12	1	0	1	0	0	4	120	0	0	3	0	5	105	7	9485	1	55	3	30	4	0	10	4	0	2	1	2
Brca1	MGLibB_07143	ATTGTGAAGGCCCTTTCTTC	5893	1580	405	840	242	228	107	74	306	243	3125	34	180	282	294	307	167	137	474	3642	381	34	265	83	587	66	38	26	61	8	22	2	15	10	10	19	104	69	116	120	5	7	11	19	16	198	19
Brca1	MGLibB_07144	TCTGATTTCAGGAGCCTACA	5190	315	0	6	27	13	111	0	1	0	30	1	16	6	0	0	1	0	1	4	20	9	4	0	0	1	0	0	0	0	35	1	1	4	7	0	0	0	23	1	0	0	1	3	4	0	2
Brca1	MGLibB_07145	TCACTTACTTGCAAAATATG	3911	214	0	2	0	2	1	0	6	0	68	34	24	0	8	4	0	1	13	15	9	2	456	3	0	1	0	3	0	0	0	8	0	4	0	0	0	2	0	1	0	2	7	9	1	7	0
Brca2	KY011637	ACAGCTGTGGTTCATAACCG	2255	433	9	8	128	2	133	1	18	34	17	499	0	17	36	6	7	16	6	17	14	1	10	5	0	511	0	0	2	5	27	5	202	12	4	6	1	0	77	1	496	2	2	10	1	0	2
Brca2	KY011638	GAGCCACTTGACGAGACTTT	963	117	0	0	0	0	1	0	8	2	0	0	1	3	3	29	0	1	0	11	0	0	0	3	34	7	0	0	208	0	0	0	15	0	0	5	0	0	0	1	1	0	2	1	0	2	1
Brca2	KY011639	AGATTTCTGGTTCTACGCTT	1804	144	0	2	5	0	0	0	2	0	0	3	30	0	0	18	79	52	0	14	4	1	2	17	21	3	6	0	3	19	0	0	22	2	0	4	1	8	1908	14	3	24	0	8	0	1	1
Brca2	KY011640	TGTTTTAAGTACCGCTTCTA	2769	565	67	20	657	7	34	5	6	10	242	41	38	15	23	57	15	162	36	111	5	18	513	58	4	20	1	0	1	1	2	4	0	67	1	10	1	29	1	787	6	7	5	5	22	1	6
Brca2	KY011641	ATGTACCCAATATGCGAGAG	1427	145	1	1	22	8	0	363	16	16	4	3	3	0	0	0	1	2	9	1	4	0	3	1	425	0	6	0	3	0	6	1	0	12	0	10	2	1	4	1	0	98	2	2	0	0	0
Brca2	MGLibA_07146	TAGGACCGATAAGCCTCAAT	2794	646	5	67	2	0	184	5	35	183	1238	3	227	0	72	2	20	12	8	17	6	38	12	31	3956	88	0	30	12	4	46	2	97	1	24	5	1	60	4	50	2	1	3	2	7	1	12
Brca2	MGLibA_07147	AAAGCTCCTCAAACCAATTG	658	105	0	0	0	0	0	2	0	54	1	8	92	0	8	87	0	1	0	1	44	0	0	5	0	0	0	8	1851	3	0	1	2	0	0	1	0	0	5	0	0	0	1	9	1	85	0
Brca2	MGLibA_07148	GGACTAGCAACATCTACCAC	1430	309	0	37	1	17	20	0	0	8	27	35	4	0	0	0	2	0	160	5	5	0	3	31	1	13	0	0	3	2	17	5	0	2	1	0	0	0	0	0	0	2	18	4	1	1	6
Brca2	MGLibB_07146	TGTGTGCACCGCAGAGTAAG	3137	543	12	140	9	48	17	6	2	5	5	4	5	297	3	15	471	20	17	5	1	3	7	11	6	4	0	3	0	53	0	0	9	1	3	3	0	0	1	2	0	28	91	3	3	1	5
Brca2	MGLibB_07147	GTACTACAACGAGAAAAGCC	620	88	0	0	0	0	0	0	19	0	4	0	0	0	0	0	2	0	0	0	0	0	0	0	0	0	0	0	0	0	0	0	0	0	0	0	0	0	0	0	0	0	0	1	1	0	0
Brca2	MGLibB_07148	TCACTGAGACAAGATTTCAG	1647	199	0	1	0	9	0	2	0	1	0	2	1	4	32	0	32	0	0	4	1	3	0	17	22	4	0	0	0	1	0	0	0	0	0	0	0	0	2	0	0	0	0	1	1	1	0
Brd1	KY011648	ACGGAGCGCACACGGTCGGC	2278	452	1	1	34	10	0	5	23	4	0	0	1	7	44	0	3	8	553	1	6	1	25	5	4	5	5	0	0	1	0	0	0	0	1	0	0	2	0	0	0	0	0	6	4	2	0
Brd1	KY011649	ATGTTCCTCACACCGTCAAT	4240	755	233	168	72	71	113	219	5	50	45	501	1027	311	125	84	476	139	1200	108	98	29	37	36	150	190	13	2	13	1	2	0	38	8	18	8	22	11	21	91	151	100	26	7	16	8	13
Brd1	KY011650	ACAGCACGCAATCCGCAGGG	2431	328	1	11	33	18	4388	0	4	1	133	277	1	23	0	3	2	225	8	2	27	4	3	38	7	26	2	0	0	2	2	8	6	6	6	7	0	28	2	0	2	3	0	7	1	2	2
Brd1	KY011651	TACTCCACAATCCGCACCTT	4369	861	35	163	1121	97	578	109	82	374	26	28	90	70	9	67	632	141	117	61	25	14	360	188	103	83	22	4	291	45	50	41	26	28	58	43	84	18	829	77	20	34	30	707	12	3	185
Brd1	MGLibA_07152	ATTAAATAGGATTGCGAATC	1219	42	0	1	0	4	0	0	31	0	0	0	4	0	0	0	0	0	0	0	1	4	0	0	0	0	0	0	0	0	0	0	1	0	0	0	0	0	0	0	0	0	1	1	0	0	0
Brd1	MGLibA_07153	TGCGCAGCAGCTCAATTAGC	3717	749	11	35	39	295	67	6	0	2	21	22	3	7	44	21	23	5	5	7	75	7	3	8	5	636	1462	18	1	1	3	1	2	10	3	0	2	63	38	140	1	12	0	3	7	1	4
Brd1	MGLibA_07154	TAATTGAGCTGCTGCGCAAG	4051	321	5	11	7	11	4	2	3	2	2	11	3	15	2	2	0	0	0	12	9	7	6	2	433	7	2	8	3	0	2	9	13	12	13	1	0	6	2	6	4	0	174	5	3	4	0
Brd1	MGLibB_07152	TGGACTGGAGCCGCCGCAAC	4775	414	0	21	91	21	1	102	6	867	35	6	639	15	4	4	58	708	4	61	1	39	36	314	4	134	0	1	3	2	3	106	0	4	6	14	3	0	0	2	0	3	1	0	1	2	0
Brd1	MGLibB_07153	AGCGACCCATCGCAGCCCCT	3758	449	9	10	7	21	2255	24	12	1	189	23	394	0	23	206	9	2	595	3	45	5	17	47	19	6	61	11	34	5450	17	16	7130	26	655	1155	30	21	209	873	0	2313	11211	989	50	16	116
Brd1	MGLibB_07154	GAGCGTAGCAGCACAGTTAG	2061	723	12	232	24	18	10	4	11	38	16	31	1990	96	644	187	97	55	20	43	18	7	58	240	32035	28	55	126	244	0	18	11	49	112	12	35	304	157020	250	20	6	4	1	155	62	2	3
Brd2	MGLibA_07155	AGTTGGTTTGTTACCCGTCC	3290	594	3	47	0	29	281	8	2	38	350	17	20	0	5	2	17	6	20	5	28	2	20	1	0	109	22	0	0	0	45	1	6	8	4	13	0	1	7	6	5	6	39	6	3	0	36
Brd2	MGLibA_07156	GGGCACTGGTAATACTGCCC	2688	817	30	901	465	77	22	0	45	1	4	0	0	11	138	16	2	8	14	4	122	13	38	3	97	32	2	0	5	27	1	30	4	3	5	0	2	9	13	8	0	0	0	3	5	2	10
Brd2	MGLibA_07157	CAGTATTACCAGTGCCCATC	4375	738	2004	43	40	168	27	98	97	2739	1141	63	114	24	1461	330	78	4058	217	13	39	1297	4	280	134	246	51	205	1	6	35	4	4	13	851	11	6	81	103	56115	27	60	67	22	10	50	5
Brd2	MGLibB_07155	CACCGATGATATTGTCCTAA	3500	657	10	14	2	43	78	23	53	18	0	11	71	16	50	62	160	58	64	7	4	23	5	61	2	10	4	1	135	1	41	1	5	66	1	0	646	10	16	4	3	9	14	7	1	3	3
Brd2	MGLibB_07156	AGTAGCATCCATGCCACAAG	958	69	0	0	0	0	0	0	0	0	0	0	0	0	0	0	5	0	0	0	0	0	0	0	0	0	0	0	0	0	0	0	0	0	0	0	0	0	0	0	0	0	0	0	0	0	0
Brd2	MGLibB_07157	GCAGGGGCCAGTTGTAAAGC	1333	172	1	0	2	0	224	0	20	0	0	20	5	106	2	0	2	4	0	54	0	1	19	2	1	2692	0	0	0	0	0	0	0	0	0	3	0	35	0	0	0	1	0	4	1	1	3
Brd3	KY011652	CTTGTAAAAGGGCCACGCAT	2283	395	53	3	7	18	17	63	1463	11	22	3	1	1	4	93	9	4	45614	23	3	9	15	1039	4	0	1751	14	52	0	3	181	7	129	1	70	1204	368	10	5144	422	14734	36	93	8	175	743
Brd3	KY011653	CCTTTTTACCCGCGTGCTGT	6025	1326	18	40	36	21	66	28	3305	52	224	249	116	24	156	182	63	28	12	25	42	861	78	21	116	11	4	14	35	11	3	1	6	39	7	7	35	12	1893	15	0	4	3	37	21	37	4
Brd3	KY011654	GCCAGTGGACGCGGAGGCGC	5194	2296	19	430	376	46	114	49	336	110	345	15	93	76	109	32	311	58	53	30	114	127	97	192	262	45	21	2	12	26	16	374	32	1175	24	243	5	12	35	28	74	16	10	180	19	8	6
Brd3	KY011655	GGGACGATGGGTGTCGCAGG	1649	693	5	55	37	63	115	87	11	34	8	21	77	42	665	42	9	238	5	0	18	35	6	21	35	15	7	0	3	2	1	65	102	0	13	2	0	2	152	1	3	0	77	8	5	1	2
Brd3	KY011656	ACAGGGGTAGCGGCAATGAC	2054	704	101	27	2	38	2	318	53	2	17	15	34	4	53	112	19	96	32	19	12	20	25	265	7	6	5	1	5	0	9	15	18	2	7	3	1	4	0	6	4	4	60	22	0	0	1
Brd3	MGLibA_07158	CACGGGGATCCCGGCAGTCC	5002	1399	104	560	2445	258	493	51	170	183	124	358	309	869	171	421	429	247	208	45	62	32	81	336	822	1605	4	34	1187	67	220	259	44	293	77	64	663	102	439	23	28	21	14	39	89	127	69
Brd3	MGLibA_07159	AGTCTTTCGCCCGGGCTTGC	2838	443	0	30	2	2	10	1	23	1	2	3	58	3	10	276	2	110	1	2	24	1	2	52	4	1	1	0	18	0	0	65	3	0	152	0	0	4	9	5	0	0	9	7	4	32	4
Brd3	MGLibA_07160	TCCCACACCGCCTGTAGTCA	7105	1975	634	796	1371	158	1191	756	654	310	3111	415	2226	772	1583	360	5054	78	540	2055	149	110	594	688	238	2684	90	121	9405	1856	12	239	178	280	690	1076	1410	226	22	221	147	248	113	1331	48	78	11
Brd3	MGLibB_07158	ACTATTGCCCCCTGCTCCAA	2874	721	2710	1630	260	2672	37	20	11	1	17	2	5	20	16	358	61	4	11	3	5	147	24	0	29	76	5	1	0	2	3	2	4	4	3	2	1	36	22	3	1	8	4	9	4	38	5
Brd3	MGLibB_07159	ACACGGTGGGGGGTATGTTC	4159	1128	103	8898	2444	457	219	499	4836	1061	150	178	2568	221	81	285	266	193	203	321	218	1483	38	763	371	408	138	110	75	7454	888	13	148	336	329	239	26	509	6	231	0	23	14	65	10	18	172
Brd3	MGLibB_07160	CACAGATGATATAGTGCTAA	841	180	0	353	0	0	12	0	28	1	1	2	9	1	1	94	1501	0	701	41	1	1	6	0	190	0	2	0	4	0	0	0	0	1	4	5	3	0	3	3	1	20	175	0	0	0	5
Brd4	KY011657	GGACCCAGCTTGGCGGTCTT	2564	1125	7956	11228	21803	8727	11305	11852	21415	7844	13738	16861	17036	20399	20911	11296	12813	13721	15768	21829	12079	29269	15198	17642	17850	12022	17419	24047	11145	3536	3209	13639	27151	8942	7121	7857	4198	6534	7343	3639	4039	1302	14189	8066	3225	3894	13417
Brd4	KY011658	GAGCCCAAGACCGCCAAGCT	1754	75	0	0	0	5	4005	0	1	3	0	1	0	1	0	0	0	0	0	0	0	31	165	1	0	1	47	2	2	0	0	0	0	0	0	0	0	23	2	0	2	1	17	1	0	7	1
Brd4	KY011659	CTGGGGGGTGGTCGCAATGA	2137	270	1	0	0	28	12	0	7	6	1151	8	0	0	21	27	3	173	0	113	0	11	4	8	3	9	0	0	9	11	1	0	0	10	0	1	0	0	0	0	0	10	0	3	77	1	7
Brd4	KY011661	TATGGAAACACCAGTTTGCG	2156	64	0	0	0	0	0	0	0	0	2	0	0	0	0	0	0	0	1	3	1	0	1	1	0	0	0	0	1	0	0	1	0	1	0	0	0	0	0	0	0	0	0	0	0	1	0
Brd4	MGLibA_07161	GGGCCTGCGTTGTAGACATT	2324	367	2	2	207	1	1	5	18	1	0	2	14	3	1	30	0	4	1	4	3	1	2	1	0	16	80	3	1	0	0	0	0	0	0	0	0	0	5	0	3	1	3	0	0	0	1
Brd4	MGLibA_07162	GCTGGAAAGGCCACGCAAAC	1516	378	0	2	1	235	0	1	0	0	1	1	14	106	2	5	17	10	193	0	2	1	1	2	6	0	0	0	0	0	2	0	1	2	12	0	3	0	4	0	1	1	0	48	3	0	0
Brd4	MGLibA_07163	GGGGTGGTCGCAATGATGGG	1772	187	61	0	0	7	314	22	0	1	2	665	1	0	0	1	10	0	1	1	6	24	1	6	2	7	0	0	27	0	0	132	6	0	0	1	0	1	0	0	1	1	2	2	0	0	0
Brd4	MGLibB_07161	AACTGAGATCATGATAGTCC	1892	129	192	19	0	29	0	0	0	31	5	362	30	1	4	2	2	2	3	0	5	4	10	32	3	0	1	0	0	0	0	2	9	1	3	2	0	121	0	1	0	6	0	0	1	40	0
Brd4	MGLibB_07162	ACCGGTGAAGGAGTCTGAAG	1312	186	0	1	0	1	8	4	0	1	0	0	12	0	9	3	2	11	0	0	1	1	44	0	0	0	0	0	3	0	0	0	2	1	0	0	1	0	0	0	0	5	0	0	1	0	10
Brd4	MGLibB_07163	ATTAAGACGATGTCATCTCC	3035	76	0	0	0	2	0	0	1	2	2	0	0	1	0	0	2	1	0	0	0	0	0	1	4	0	0	0	0	0	0	0	0	0	0	0	1	4	0	0	0	3	0	1	0	2	0
Brd7	KY011662	GCAGATTGAGCGCGTTGTCC	5290	1080	49	1031	52	1726	301	103	558	132	146	27	156	7	30	30	138	43	162	33	13	74	120	3224	340	181	64	19	2400	7	61	43	251	272	68	54	51	431	12	653	6	659	17	188	6	203	2
Brd7	KY011663	ACCTTTTATTGTCCTTAGCG	3391	554	56	1319	8	0	141	22	0	0	36	34	23	10	6	407	2	5	3	34	4	6	19	2363	19	15	0	0	1	179	9	165	20853	70	108	40	3	2	0	61	0	0	1	8	7	11	0
Brd7	KY011664	CGGCTGCTGGCAGCGCGAGA	850	61	0	0	0	1	0	0	0	0	0	0	0	2	0	0	1	4	0	0	0	0	9	0	0	0	0	0	0	0	0	0	0	0	0	0	0	0	0	0	0	0	0	2	2	0	0
Brd7	KY011666	GTGACGGATTTTATTGCGCC	4864	435	2	87	27	7	2	8	44	1	6	0	37	0	4	54	183	18	15	3	5	3	8	24	5	21	4	0	0	2	8	0	0	12	4	1	26	1	0	3	635	2	2	13	5	2	1
Brd7	MGLibA_07165	CCTCGCTCCCCCCGACTTTG	8419	1934	2057	679	73	36	288	133	164	27	82	25	44	233	150	1919	22	223	89	60	108	24	558	1060	273	186	30	6	12	18	12	4	2	209	41	6	12	179	155	22	13	56	50	45	8	25	98
Brd7	MGLibA_07166	CCTCAAAGTCGGGGGGAGCG	1512	353	12	4	157	20	0	45	10	70	15	1	4	178	1	33	3557	3	102	8	17	1	122	17	110	32	0	0	0	0	0	11	0	0	773	13	0	291	3	1	209	21	10	5	2	1	22
Brd7	MGLibB_07164	ATCTTATAGGGACATGACAC	1837	337	4	0	1	0	4	0	2	3	0	2	1	0	7	0	1	8	0	3	4	17	1	73	2	0	0	0	4	0	6	3	0	3	0	1	0	0	2	0	0	0	2	1	0	0	19
Brd7	MGLibB_07165	TCGAGACCGTGCAGAGAATG	2891	586	679	16	13	2	37	3	258	17	4	6	9	2	11	5	3	63	5	11	4	2	3	59	732	2675	0	27	119	1	4	0	0	4	36	0	2	0	2	5	0	14	2	2	1	175	32
Brd7	MGLibB_07166	CCAGTCCATAGAAGAACTAA	738	208	14	5	388	2010	3595	1446	152	23	8608	4	52	315	346	444	2178	37	467	175	3182	61	867	1921	7590	3	15	186	357	21	80	28	258	23	15	5	120	42	786	31724	812	14	112	9	8	20	9
Brd8	KY011667	GGGGTACTCGGCAAAGTCCC	1171	194	0	0	35	1	2	1	2	1	0	0	3	1	0	1	2	18	17	2	0	8	5	0	12	11	0	0	1	6	0	0	0	4	7	1	2	0	0	3	0	2	1	6	3	0	0
Brd8	KY011668	ATCACAGTCGGTAACCTTCG	2501	263	1	0	2	260	94	1	3	429	1	4	1	7	13	51	12	4	6	3	0	2	2	1	2	4	10	3	264	0	4	0	0	0	1	1	0	0	0	0	0	3	6	1	2	1	1
Brd8	KY011669	ACAGTCGGTAACCTTCGAGG	2265	142	0	2	1	10	2	118	1	851	0	2	4	0	2	0	0	4	2	3	1	0	1	1	0	3	1	1	22	0	0	1	5	1	10	0	0	6	0	4	2	0	0	0	3	3	2
Brd8	KY011670	CTCACCCTGGTACGCAGCAT	4772	1390	3970	12128	1844	6784	9886	7333	5232	10952	18119	19330	19929	29310	9309	58857	22863	15511	7698	11145	17218	18270	9321	5718	1434	8278	6184	14738	6055	4650	1066	4336	222	42938	9976	27154	5906	14899	1852	26637	31863	5132	1021	1373	4321	17896	2727
Brd8	KY011671	GTTTTCCACAGACGGAAACG	981	23	0	0	0	0	0	0	0	0	0	0	0	0	0	0	1	0	0	0	4	0	2	0	0	0	0	0	0	0	0	0	0	0	0	0	0	1	0	0	2	0	0	0	0	0	0
Brd8	MGLibA_07167	ATCAAGCCCTTTGCAGAACC	3223	409	246	0	0	19	2	18	42	0	13	9	2	0	0	9	540	0	4	14	20	86	8	14	1	191	4	2	2	1	1	1	64	34	3	1	5	3	18	3	181	1	23	18	4	5	0
Brd8	MGLibA_07168	GAGCACAAGCTGCTGAGTAC	1922	326	9	10	2	16	4	0	14	2	25	11	6	0	5	1	3	168	14	2	33	0	6	84	5	1	0	1	0	0	0	2	0	0	0	0	1	0	0	0	0	0	0	2	1	0	0
Brd8	MGLibA_07169	ATGCTAAACACAACTTCTCT	1651	110	2	0	0	60	0	0	0	0	1	0	0	2	3	0	0	0	1	22	2	12	1	0	6	2	0	0	0	0	0	0	1	0	49	0	0	3	0	1	73	5	0	2	1	0	0
Brd8	MGLibB_07167	AGAACTGAAGAAAGTCATAA	428	10	0	0	0	2	0	0	0	0	0	0	0	0	0	0	0	0	0	1	0	0	0	0	0	0	0	0	0	0	0	0	0	0	0	0	0	0	0	0	0	0	0	1	0	0	0
Brd8	MGLibB_07168	AGGCCGGCCAGGTTCTGCAA	2127	176	0	0	2	0	4	0	11	0	0	0	5	2	74	12	68	0	24	0	8	1	1	1	2	49	0	0	0	0	2	3	0	0	0	0	0	0	1	0	0	0	0	1	1	0	0
Brd8	MGLibB_07169	GTTTAGCATCTTCTGTCATG	5560	1183	21	43	160	205	95	15	43	7	16	16	46	107	262	74	37	292	10	49	20	836	19	54	361	154	4	4	0	14	0	14	2	12	2	4	3	0	2	1	2	1	11	42	4	6	11
Brd9	KY011672	CGATCGCTCAGACCACGAAC	1983	302	4	4	28	1	5	0	37	10	14	6	16	66	5	22	251	13	11	22	5	15	8	250	49	3	1	3	9	2	1	2	1	0	2	2	0	0	3	0	0	1	4	3	8	0	4
Brd9	KY011673	CTTGCCTGGCTGTGTTCGGC	3954	496	7	38	8	15	7	1169	97	14	2	14	21	2399	44	12	186	175	8	93	23	4	37	13	94	96	22	1	7	33	8	5	20	14	3111	8	1	69	3	12	10	15	12	10	1	9	4
Brd9	KY011674	GGAGCAATTGCATCCGTAAC	1570	257	15	0	1	99	2	1	23	1	0	0	10	635	0	0	1	13	2	1	2	1	11	7	1	1	0	0	0	2	0	0	10	0	0	0	1	2	0	0	0	3	2	2	3	2	1
Brd9	KY011675	GCCAAGAAGATCCTGCACGC	3362	903	13	25	30	51	89	14	39	10	47	82	78	159	15	19	31	36	65	23	47	29	23	53	160	58	2	1	34	4	1	1	0	3	7	2	11	1	33	4	0	3	1	9	2	1	2
Brd9	KY011676	TCATCTTAAAGCCCGCGTGC	4564	560	7	3	7	8	51	4	113	1	0	0	11	5	11	1010	18	6	2	38	7	35	22	5	8	60	0	2	0	0	0	0	0	3	4	1	0	0	1	6	1	0	70	2	4	9	0
Brd9	MGLibA_07170	TGAGCGATCGTCGTAGTAGC	3229	681	33	65	13	1	23	29	9	1	27	19	5	16	18	17	228	1	203	12	6	10	0	3	9	16	0	0	8	2	1	0	0	0	0	4	0	147	0	86	0	5	18	2	3	2	0
Brd9	MGLibA_07171	ACGATCGCTCAGACCACGAA	1376	437	19	45	0	122	12	12	38	315	8	736	162	471	102	1	4	69	11	42	519	9	6	36	26	2	13	5	267	14	13	12	1	2	548	2	11	5636	6	5	5	1	1887	4	3	56	2
Brd9	MGLibA_07172	GAGGCTGATGCTTTCGACCC	2788	347	5	0	12	353	118	0	781	18	18	4	0	6	5	3	11	1	8	19	2	6	3	7	29	8	491	2	0	1	1	0	0	1	23	0	1	0	109	20	19	0	1	0	3	0	6
Brd9	MGLibB_07170	GAAGGAACACTGCGACTCAG	1623	228	0	2	229	16	0	3	0	0	7	2	5	10	0	2	0	0	3	4	1	112	0	3	181	2	1	0	0	4	0	0	0	4	0	1	0	0	2	0	0	0	0	1	2	0	10
Brd9	MGLibB_07171	TTCATCGTGCCAAAGTCCAT	3972	656	34	76	18	51	6	930	23	37	50	28	6	74	13	78	294	58	23	17	481	61	17	47	262	26	0	9	2	2	2	2	0	32	3	0	4	1	816	4	10	2	1	8	5	3	4
Brd9	MGLibB_07172	ACGAGAGCACACCTATCCAG	2159	216	3	0	3	0	5	0	1	0	0	0	2	0	5	3	10	3	0	17	1	0	1	9	0	0	1	5	0	0	0	0	0	0	0	0	0	2	0	0	0	0	0	3	2	1	1
Brdt	KY011677	TTGGCCTTTCCAACAGCCGG	2391	257	12	105	0	0	7	11	48	4	0	1	2	9	3	30	8976	12	5	10	635	0	1	2	0	0	213	13	42	2	0	0	0	59	2	12	6	2563	4153	5	5	3	32	2570	3	3	0
Brdt	KY011678	AGAGAAGCCGTGCTTCCACA	1201	288	0	0	1	10	10	1	0	1	0	0	1	9	2	1	85	1	2	1	3	131	32	0	0	3	1	4	3	0	1	2	1	2	4	0	0	0	9	2	0	0	25	2	1	3	0
Brdt	KY011679	GCGTCCACCGGCTGTTGGAA	1614	408	49	7	76	23	44	5	3	13	34	8	11	6	5	18	15	17	5	11	103	5	0	15	8	22	2	0	7	1	22	0	0	0	2	1	1	1	2	0	3	4	0	1	1	0	0
Brdt	KY011680	TCACGGCGTCCACCGGCTGT	5484	1789	402	199	954	253	446	2753	431	487	255	182	63	508	432	448	89	46	49	450	40	22	1198	703	27	188	21	21	178	9	8	49	34	84	182	583	1062	569	16	549	18	34	2041	27	91	289	37
Brdt	KY011681	TTTAGTTTCACGGCGTCCAC	5057	1017	61	26	43	11	35	36	149	6	32	97	65	26	19	47	40	50	44	20	13	15	60	114	597	8	248	69	5	8	5	223	13	9	245	7	10	3	11	7	247	13	38	18	36	10	1
Brdt	MGLibA_07173	AAAGACATTCTCTGCCGCTT	2385	312	147	2	86	3	0	0	1	14	3	1	7	0	10	29	64	86	75	3	6	4	72	0	3	6	0	0	1	0	34	0	2	1	3	0	4	0	10	0	0	3	2	3	1	0	2
Brdt	MGLibA_07174	GATCTGTGACTCGCAGTCTC	3200	451	17	370	242	171	298	886	193	51	16	15	481	26	96	190	66	101	556	151	30	8	158	53	15	68	42	0	33	245	43	47	12	75	37	14	109	15	165	18	8	15	801	68	57	113	139
Brdt	MGLibA_07175	ACAATAGCTGTTTGTCGACT	1949	337	0	87	5	115	2	0	5	0	149	11	4	34	1	6	6	0	2	0	3	1	26	8	2	19	2	0	0	2	0	0	2	4	2	0	0	0	0	2	0	2	0	11	0	0	9
Brdt	MGLibB_07173	CTCTTGGCCTTTCCAACAGC	2245	418	3	80	6	178	1	0	102	0	8	7	94	10	403	33	278	23	1	1	17	11	27	0	13	0	0	16	26	0	140	13	0	9	10	1	4	2	2	2	41	4	4	43	0	1	10
Brdt	MGLibB_07174	GCCACAAGAAGAGCAAGTTG	1700	422	10	1	23	9	0	65	31	6	12	3	2	5	18	14	0	1	0	3	1	1	70	170	0	8	5	0	4	4	1	3	0	0	0	0	2	0	0	2	0	4	0	10	3	1	4
Brdt	MGLibB_07175	AAACTGCTACTTATACAACA	951	169	0	0	0	0	0	2	2	11381	20	0	0	4	1	0	4	0	0	1	11	1	4	0	1	1	1	0	1	0	0	0	0	6	0	0	0	0	0	0	1	0	0	1	0	0	0
Brpf1	KY011727	AGATGCTGATTCGGTGGACA	1310	168	8	0	0	1	9	0	6	41	2	0	1	0	0	2	3	2	0	0	0	1	11	2	0	27	0	0	0	0	0	1	1	0	0	0	2	2	10	3	0	16	1094	96	0	1	6
Brpf1	KY011728	TGGGCCGGGGTGGTGCGTCA	3338	1149	9	151	60	58	3663	64	16	155	68	3887	125	598	2	13	14	68	14	31	39	5	9	17	91	88	1440	1461	52340	117	12	129	19	128	23	256	18	11	76	3	35	1037	7	125	8682	20	37
Brpf1	KY011729	GTGGTGGTCTTACCGGTAGT	2471	638	229	264	6	202	20	577	129	30	26	5	30	36	1	8	124	33	63	100	269	181	328	1	232	7	0	1	1	90	0	4	7	2	4	1	10	2	2	4	1	1	2	12	10	1	9
Brpf1	KY011730	GGCTGTCTTGCGGACGCTAA	1979	616	89	2556	27	1491	26	2597	429	195	75	13	28	19	10	6	1720	1495	584	70	211	341	11	380	2	119	2879	1010	9	6	187	350	78	545	3712	125	160	3	444	99	3220	1224	38	23	9	13	15
Brpf1	KY011731	TTTGTAGGCGCCTGAGTAGT	4691	715	1	53	36	60	24	3	41	26	97	1	52	5	7	637	12	4	40	140	11	7	49	18	445	31	1	0	1	19	1	2	0	12	68	0	0	26	43	22	2	25	9	8	10	5	1
Brpf1	MGLibA_07221	TGTCTTGCGGACGCTAAAGG	3064	655	3	20	8	3	61	3	10	6	13	4	2	5	5	0	4	27	3	2	54	5	17	2	2	19	0	1	0	0	2	0	2	4	0	2	0	0	4	3	23	4	22	3	10	5	2
Brpf1	MGLibA_07222	CCAACCGCCTGACCATCCAG	5172	1441	59	73	15	108	25	48	5	34	246	59	49	91	34	201	111	12	49	52	16	16	16	52	21	69	213	3	11	1	9	53	128	14	7	4	21	56	11	73	94	16	510	70	21	9	4
Brpf1	MGLibA_07223	CTGAAACGACAATCACGGAA	730	95	0	0	0	0	0	0	0	0	0	0	0	7	0	0	1	0	0	6	0	0	0	0	0	1	0	0	0	0	0	0	0	0	0	0	0	0	0	1	0	0	0	1	0	0	0
Brpf1	MGLibB_07221	TTGGCACCTGTCTCCCGCAC	8548	2301	31	242	126	26	41	104	42	1188	133	40	303	125	219	158	298	100	243	33	81	230	68	159	39	114	32	24	53	14	12	15	10	149	27	61	53	44	23	110	464	30	133	18	22	11	70
Brpf1	MGLibB_07222	CATCCTCCTCCGAAAAACCT	2223	265	8	7	0	1	2	0	1	2	3	1	2	3	2	4	0	2	0	12	22	1	0	0	1	8	0	0	5	0	0	0	1	0	1	0	0	0	6	1	0	0	0	9	5	0	9
Brpf1	MGLibB_07223	CGAGCCGGTCCCTCTGTCTG	7981	1474	23	8	134	32	4	31	28	1	9	126	101	2324	70	15	92	54	24	13	9	3	7	34	199	226	14	9	197	43	7	11	1530	32	12	30	271	0	16	6	980	9	51	24	8	27	445
Brpf3	KY011732	TCGCAAGACTGCGTATTGTG	5382	1167	45	1896	40	210	91	292	150	68	62	2639	76	1690	79	546	539	65	3271	550	448	76	276	342	8634	637	194	39	212	2982	130	25	15	70	1111	14	4	148	40	14	1156	24	1680	29	21	10	86
Brpf3	KY011733	GGAGGTACCGGACGCATGCT	1470	653	341	1553	113	570	1850	318	1988	131	63	232	405	205	431	595	94	365	1933	493	774	105	956	570	8119	1041	5	65	136	13	82	69	23	45	23	169	81	5272	309	206	14	228	726	30	26	18	1873
Brpf3	KY011734	TCCAGATGGCGCAGACTACG	3569	894	72	2	71	5	11	26	12	5	3	7	4	1182	11	95	23	40	10	37	11	23	7	11	649	4	0	0	1	8	0	2	2	50	18	1	4	4	0	2	3	4	5	5	193	8	3
Brpf3	MGLibA_07224	TGATCGAGCTCATCCGCAAA	2507	367	11	55	0	54	5	127	2	23	0	9	2	0	6	13	1	86	2	90	24	0	5	6	1	269	0	2	15	20	3	1	0	1	66	0	2	0	0	0	0	2	0	0	1	10	1
Brpf3	MGLibA_07225	GGAACGGTGTCCCCCTCATC	3461	1296	49	6229	154	353	58	252	120	55	2540	175	574	100	78	134	417	74	39	152	291	422	243	31409	396	52	12	15	34	111	7	51	167	1449	75	20	336	60	38	56	1872	70	30	80	70	34	176
Brpf3	MGLibA_07226	GTCCTCAACAGGACCGTAAA	324	32	0	0	0	0	0	0	0	0	0	0	0	0	0	0	0	0	0	0	0	0	0	0	0	0	0	0	0	0	0	0	0	0	0	0	0	0	0	0	0	0	0	0	0	0	0
Brpf3	MGLibB_07224	CTTGCCCGAATCACCCAGAT	3061	713	55	51	12479	7	58	1	7	75	60	17	35	44	2	6	107	196	12	5	21	197	320	142	151	56	14	0	140	25	5	0	2	7	0	2	41	1	0	97	1	11	0	10	2	8	7
Brpf3	MGLibB_07225	ACCGAGCAGCTGTCCGCCTC	7278	1411	28	45	47	158	203	49	525	14	325	334	342	187	393	443	42	19	54	20	468	19	45	168	440	46	6	0	7	4	2	13	7	51	7	10	9	22	87	10	5	18	26	62	6025	25	15
Brpf3	MGLibB_07226	GCAGAAACTTCGCCATGACC	3790	849	30	25	46	39	2435	7	21	0	264	4	11	43	255	9	2	101	50	322	33	14	4	9	95	7	2	1	17	7	1	3	4	1	9	5	10	4	3	2	34	6	609	4	103	1	12
Brwd1	KY011751	CCCTCCCAGTCCAACCTCTT	6757	1588	205	78	589	1881	1614	6612	1364	253	130	1207	70	1280	309	698	539	996	59	1689	255	601	112	1289	167	391	5341	8251	15	66	229	9	4711	4935	1599	2250	4329	81	21	8286	577	1035	195	568	70901	30	65
Brwd1	KY011752	CAACAGGAGCTACGAGGAAT	1223	202	0	0	0	2	5	0	0	1	0	1	0	4	4	0	0	0	6	1	0	2	0	7	0	1	0	0	0	0	0	0	2	2	0	4	0	0	0	0	0	0	0	0	0	0	0
Brwd1	KY011753	CGAGCACAACAGGAGCTACG	1425	433	33	8	6	34	184	0	35	1	2	3	2	1	3	4	20	2	184	1	5	0	2	1	4	0	2	0	1	5	4	3	1	21	0	1	3	0	0	18	6	0	0	7	1037	2	2
Brwd1	MGLibA_07236	ACCGGACGTCGGGCCGGCGA	2032	402	2	2	41	47	145	5	15	26	2	4	4	1	1	3	1	0	2	3	1	6	275	3	3	162	0	0	3	0	0	1	2	2	0	2	0	1	0	58	13	1	0	4	0	58	6
Brwd1	MGLibA_07237	CGCCATGGCGGAGCCTTCGC	4035	979	4	27	45	4	8	39	51	13	31	10	4	8	5	10	306	6	3	3	52	24	107	27	5	39	3	0	0	1	4	1	5	16	1	0	7	4	1	2839	4	5001	13	2	3	4	1
Brwd1	MGLibA_07238	CGGCACTCACCTGCGCCGCT	1761	712	4	13	2091	41	0	24	7	2	2	45	27	2	410	1	9	14	20	62	613	6	30	79	1	6	12	2	6	943	7	2513	54	836	243	2	11	380	77	228	37	42	5	8	320	260	5
Brwd1	MGLibB_07236	ATCGCCCGCTACCTCTCAGC	5353	556	4	1	9	7	28	2	24	9	60	7	1	1	1	2	2	0	63	3	5	12	1	1	24	4	0	0	41	1	1	0	1	0	11	2	0	0	0	1	0	1	18	4	0	1	16
Brwd1	MGLibB_07237	CATTCCAGCTGTTGCCGAAG	2280	437	0	2	153	5	5	6	6	2	0	1	4	0	2	20	0	1	1	1	15	82	1	4	0	2	0	0	2	0	0	20	1	0	54	1	2	0	7	11	0	2	0	3	6	6	0
Brwd1	MGLibB_07238	GGGAGGGCAACGAGCACAAC	1021	274	0	22	1	0	0	1	9	0	0	0	5	3	766	6	0	0	2	14	1520	25	7	482	0	4	19	3	0	1	0	0	0	20	1	1	1	0	1	18	0	0	0	0	4	0	7
Brwd3	KY011756	CAATTTGGCCACTACGCCGA	3416	718	67	116	65	283	93	227	36	76	509	493	295	154	858	280	440	55	46	22	10	361	30	5	48	3119	42	0	86	13	2	39	8	5	8	4	9	0	3	18	10	1	271	7	8	4	10
Brwd3	KY011757	TGAGGGGCCGATAATCGGTA	1989	755	1099	89	105	467	81	11	220	657	8	368	1429	86	33	77	35	11304	153	322	177	13	18	2382	4	262	218	33	7	188	24	48	101	156	276	1	13	78	1545	17	180	211	67	213	100	21	2240
Brwd3	KY011758	ACTACATCCGGTTAATTGCC	2443	479	7	0	7	44	1219	183	7	2	5	2	8	11	0	73	1	199	35	3	83	6	676	86	44	41	255	5	18	5	6	103	2	98	1330	2	471	29	440	136	3	69	30	32	9	3	63
Brwd3	KY011759	TAGCCTTTGATCGAAGCGGG	1717	711	5	67	51	78	5	15	42	29	1387	39	23	40	220	7	262	11	20	6	27	8	87	114	32	29	117	8	0	0	218	43	81	10	43	7	4	7	121	49	49	178	48	311	14	32	48
Brwd3	MGLibA_07239	AGCTGTATTACCTGATCGCA	2902	596	5	8	18	1	0	11	4	22	5	4	8	48	14	14	3	291	15	186	37	17	8	1	23	10	0	1	2	0	39	198	3	2	4	2	946	8	0	3	0	2	9	1	4	0	3
Brwd3	MGLibA_07240	TGATTCCGCGCCGCTTAGAC	7742	1553	11	66	10	128	27	92	58	13	64	30	44	67	148	7	157	8	7	30	19	33	57	250	305	13	9	17	0	4	168	35	427	4	333	6	2	0	76	19	4024	22	26	73	10	1	3
Brwd3	MGLibA_07241	CACCTGAGCGGATTTGTTAC	2374	524	18	2	0	4	2	19	18	2	8	2	3	2	5	0	3	1	2	1	6	1	106	2	8	15	40	5	0	0	2	0	0	5	13	2	1	13	47	6	1	0	15	17	1	1	1
Brwd3	MGLibB_07239	AGAGCACCGAAGAAGCTTCG	788	151	0	0	0	0	0	0	0	0	1	0	0	1	0	0	3	0	0	0	0	1	2	1	0	0	0	0	0	0	0	0	0	0	0	0	0	0	0	2	92	0	2	1	0	1	0
Brwd3	MGLibB_07240	CCTAGTAATGTCTGTACCCC	5621	1205	178	358	547	505	303	17	4505	1254	19	327	98	356	82	1674	782	138	166	2547	210	74	148	576	87	387	10	1097	1245	49	39	13	127	750	78	22	2288	72	64	92	45	126	129	320	5583	7	113
Brwd3	MGLibB_07241	GCAAGAGCTCGAAGAGCATC	1061	521	122	3	480	65	16	2	4	7	595	51	9	130	9	218	78	40	25	14	20	11	1	228	82	12	1	0	0	1	3	0	22	47	5	2	11	1	187	19	19	11	0	9	2	0	2
Btg3	KY011892	CATCCAAAGGTCAGGCCTAC	2861	945	111	1886	466	936	2126	231	13156	1745	9955	3398	3295	86	2401	257	373	793	2791	952	1689	315	1211	790	877	1955	194	183	607	142	108	301	230	217	370	162	88	3423	93	96	1055	968	1866	1653	51	1322	1728
Btg3	MGLibA_07329	GCGGGTCTTACCTGGTACAC	2691	733	25	45	981	2940	68	22	82	91	388	107	426	35	225	24	71	1747	1293	212	14624	37	419	32	99	40	59	21	5	7	1	69	927	10	131	84	39	20	73	166	41	183	66	103	2928	63	174
Btg3	MGLibA_07330	AACACCAAGCCCCGTGTACC	3892	875	10	48	20	78	217	18	39	50	23	23	97	17	25	12	32	90	17	13	30	28	14	44	203	36	6	1	15	12	21	26	23	52	4	12	10	7	7	5	2	4	13	17	10	1	1
Btg3	MGLibA_07331	TTACCTGTAGGCCTGACCTT	4656	1084	13	47	295	141	120	62	362	215	156	10	243	46	177	92	36	93	239	92	53	63	145	160	55	206	6	1	62	6	11	93	14	20	30	467	6	3	94	2	14	9	14	31	777	2	41
Btg3	MGLibB_07329	CACCGGCAGCACACCTCACA	5397	1591	26768	190	488	222	78	709	112	69	400	36	242	515	154	355	43	364	2180	87	68	177	60	149	268	785	34	5	616	6	275	43	27	18	2612	42	19	33	12	23	21	28	3	25	14	8	38
Btg3	MGLibB_07330	AAAAATGAAGAACGAAATTG	613	62	8	0	0	2	1	1	0	6	8	0	2	0	0	0	0	0	3	2	0	0	6	0	0	0	0	0	1	2	0	0	0	0	3	0	0	0	0	1	1	0	0	3	1	2	0
Btg3	MGLibB_07331	CTGCATCTTGTACAGCGACC	2560	433	5	159	14	53	184	2	11	5	423	7	21	7659	23	27	48	154	55	5	8	33	318	12	249	112	4	0	0	5	9	12	0	4	0	0	2	7	0	0	1	21	14	0	17	3	8
Btla	KY011903	AACAATCTGTGTACCCCTTG	3591	1678	1148	589	1879	6478	14982	2483	3384	3614	516	1664	12164	9684	13567	14294	7111	70	1537	8680	1414	4057	13394	356	22115	636	1518	11047	4217	2366	2167	6756	2323	1170	3060	2851	303	506	17216	314	802	313	715	326	9003	1966	5184
Btla	KY011904	GCCCTCAGCTATACACTAGT	2135	1975	669	630	2234	980	1080	576	1004	233	468	343	635	946	1891	221	1559	618	810	2801	968	653	1690	2156	493	474	253	253	1001	159	144	315	865	212	792	57	713	69	4629	64	39	26	1204	267	281	208	747
Btla	KY011905	CCCTCAGCTATACACTAGTT	2336	995	19	77	540	86	35	296	171	22	114	5	494	229	9	35	33	5181	48	25	21	53	94	70	421	182	3	0	4	0	1	1	5	46	663	4	1	1	1	12	0	4	8	11	4	2	6
Btla	KY011906	GGAAGAAAATCAATCAGTTC	819	180	1	0	3	0	9	0	1	0	0	2	0	0	0	0	0	0	0	0	78	0	0	1	1	0	0	0	1	0	0	0	0	1	0	1	0	0	0	0	0	0	0	0	1	0	0
Btla	MGLibA_07338	CAGTGCAACTTACTATTACG	2605	723	23	20	10	8	1	4	3	10	14	43	6	2	4	13	5	1	1	13	42	1	11	2	20	0	0	0	2	0	6	0	6	2	9	3	4	0	1	13	0	0	29	5	26	45	0
Btla	MGLibA_07339	CTCGTAATAGTAAGTTGCAC	2101	611	22	140	43	55	11	54	145	12	12	12	66	810	86	271	25	32	13	18	44	18	514	11	123	3878	84	4	365	9	6	0	1	25	225	71	7	11	142	61	487	9	793	643	49	7	3063
Btla	MGLibA_07340	AAGAATTCCCTAAATAACCG	1709	112	4	0	0	0	0	0	1	0	0	0	0	0	0	0	0	0	0	0	12	0	0	0	0	0	0	0	0	0	0	0	0	0	0	0	0	0	0	0	0	0	13	1	0	0	0
Btla	MGLibB_07338	CCAGATGCCACCAATGCCTC	3840	1398	175	67	723	1239	40	155	1117	586	1586	145	55	262	318	86	131	150	32	689	59	1015	11	31	51	33	38	14	50	36	21	5	47	164	9	190	4	614	333	327	25	9	10	24	21	6	11
Btla	MGLibB_07339	TAAAGCAGCCAAGTCCTGCC	3766	1151	19	23	814	29	28	148	92	107	697	205	185	44	3261	88	461	37	260	1887	61	97	19	184	25	167	27	104	191	143	20	65	19	132	26	2	6	20	47	46	68	3	3	14	11	12	5
Btla	MGLibB_07340	TCTTAGTAGCTTTCTCACAA	2463	456	7	36	4	79	32	1	6	100	5	113	0	15	27	16	2	45	98	134	8731	1	634	2	11	9	0	0	8	39	0	0	0	3	5	3	21	1	0	4	21	5	7	58	7	0	0
C920025E04Rik	MGLibA_07599	ATTTCCACACCGTCGTATCC	5001	694	614	48	150	436	86	15	34	22	62	35	120	43	1642	41	62	164	38	38	1578	83	135	90	215	33	6	6	49	11	377	2	61	32	280	11	119	35	23	4	18	11	38	490	470	17	100
C920025E04Rik	MGLibA_07600	TGGTCGCGGTCCAGGAGCGC	5750	1277	733	639	467	483	749	157	756	45	461	583	435	1675	1573	332	29	176	2611	490	2417	379	181	55	23	1220	43	10	1276	50	17	59	186	1019	96	256	92	88	516	25	96	49	124	85	6509	222	28
C920025E04Rik	MGLibA_07601	GAGGCCGGGCCGGGATACGA	1973	282	0	1	0	7	1	0	63	0	0	0	0	5	0	1	0	0	0	1	1	2	0	3	0	7	0	0	0	1	0	0	23	3	2	0	0	0	0	0	0	3	1	3	1	0	0
C920025E04Rik	MGLibB_07599	GCTCCATACATACCTACAGC	3703	493	4	8	2	15	228	1037	169	3	37	21	7	256	130	108	141	2	12	75	65	9	27	73	5	801	15	1850	20	4	221	20	215	2694	11	3	16	2542	104	14	9	3	30	1257	4	291	13
C920025E04Rik	MGLibB_07600	AACAGCAATGATTACCATGT	2768	970	3	2	2	3	8	10	1	2	9	0	6	8	2	3	6	3	10	13	1596	1	35	49	1	0	99	7	1	0	10	0	25	6	56	2	4	1	2	1487	0	639	9	9	7	109	78
C920025E04Rik	MGLibB_07601	ACATGGAGTTTGTGGAGACC	2763	118	7	0	0	0	0	2	0	0	0	0	0	0	0	0	0	0	0	0	3	1	1	0	0	0	0	0	2	161	0	0	0	0	4	3	0	0	0	1	414	0	0	0	0	23	0
Caprin2	KY012859	CAAATGGCCAAGTCCTGACG	2800	723	14	23	54	236	216	58	2578	18	37	40	32	132	39	40	46	65	17	26	38	19	48	53	502	60	0	0	3	8	5	13	7	5	82	13	4	1	17	5	0	4	2	6	11	0	4
Caprin2	KY012860	CCTGGGAAGCAGATTATGCT	1870	319	0	0	139	0	14	0	0	0	23	1	0	132	0	3	0	2	1	2	2	1	1	5	0	0	893	15	0	2	1	0	8	1531	0	12	0	0	0	7	0	1	6	0	2	0	1
Caprin2	KY012861	ACAAGTTCCGTAAGAGATTC	1242	189	4	15	19	6	0	8	3	2	647	4	3	88	11	13	1371	2	1	18	2	1	0	4	4	9	1	47	2	0	9	1	0	82	2	0	0	1	1	5	1	0	10	0	1	1	2
Caprin2	KY012863	TAGGAACATCGAGAAGAAGA	741	139	0	2	0	0	1	1	3	0	3	0	3	0	1	0	0	0	1	0	0	0	0	5	3	0	0	4	0	0	1	0	0	2	5	1	0	0	5	0	0	0	0	1	23	0	0
Caprin2	MGLibA_07968	CAACTACTTACCAACTGGTC	2697	573	25	188	1	3	7	18	3	27	0	11	1	10	64	2	31	3	1	3	3	0	2	3	10	8	5	0	28	1	1	12	4	2	0	0	2	1	4	14	0	3	0	4	2	4	93
Caprin2	MGLibA_07969	TATAAAGATCGCCTTAAAAA	503	70	4	2	1	50	5	0	0	0	11	0	32	2	3	73	0	2	0	0	1	0	2	0	2	133	0	0	2	28	0	0	0	0	0	0	0	1	0	1	0	0	2	0	1	0	0
Caprin2	MGLibA_07970	ACAAGGATGACTGCTCCATC	3148	743	12	47	127	19	736	32	19	15	126	13	339	9	116	11	42	39	30	10	39	29	37	32	18	6	4	5	3	0	0	26	178	13	5	490	1	33	3	1	1	4	19	7	5	11	311
Caprin2	MGLibB_07968	TCAGCATATGCTCCCTTCTC	9058	2359	410	269	902	382	211	122	130	542	108	263	212	3119	651	1338	3166	167	328	32767	71	35	161	573	277	295	351	8	430	60	56	266	8	19	40	9	33	42	92	53	53	51	121	78	3250	72	99
Caprin2	MGLibB_07969	GCTGCTGAAAGCGCAGAAAA	469	155	0	0	0	10	4	16	0	0	0	0	8	0	0	0	0	0	2	1	4	0	1	5	0	68	0	0	1	0	0	11	5	0	0	0	0	0	1	0	0	0	0	0	0	6	1
Caprin2	MGLibB_07970	AGCAGTCATCCTTGTACTTT	3586	1077	32	580	51	76	39	11	329	104	276	105	0	8	9	14	452	2	67	8	16	150	2970	268	55	106	2	2	2	1	0	0	21	1	8	7	2	87	71	0	0	8	219	11	44	3	4
Carm1	KY013004	GCAGCAGGCGCTGCGCCTTG	2688	502	0	0	1	148	0	0	0	40	80	0	1	0	1	0	17	0	0	1	65	2	4	3	0	335	0	0	0	0	0	1	0	0	1	3	2	0	0	0	0	0	35	0	2	2	2
Carm1	KY013005	GGTGCGCGCCGGACCAGACG	1715	84	0	0	0	0	0	0	0	3	0	1	0	0	0	1	1	0	0	0	0	0	2	0	0	0	0	0	0	0	0	0	0	0	0	0	0	0	0	0	0	0	0	0	0	0	0
Carm1	KY013006	CGCGCCGGACCAGACGCGGC	1852	318	0	0	4	688	0	0	5	0	0	0	0	0	0	2	273	0	1	4	4	1	2	1	1	1	0	0	0	2	0	0	0	4	0	1	0	3	0	0	0	0	2	1	4	2	0
Carm1	KY013007	GGTTCTGCAGGATCGCACGC	2498	307	0	1	43	0	0	11	23	0	64	1	3	5	0	5	13	1	0	7	15	6	5	10	11	14	0	0	0	5	10	4	0	4	1	3	1	0	0	0	0	0	1	8	5	1	1
Carm1	MGLibA_08061	CGTTCGCGTCGCCGATAGTG	2372	123	38	1	90	89	62	0	35	13	1	15	1	36	0	11	1	91	8	18	1	1	4	143	5	0	0	0	0	0	0	0	1	0	0	0	1	1	1	1	0	0	21	0	2	0	0
Carm1	MGLibA_08062	CTCACTATCGGCGACGCGAA	2178	141	4	0	0	0	47	2	6	1	0	0	0	0	0	0	5	2	8	2	4	153	25	1	1	2	0	1	0	0	0	0	0	0	0	1	1	0	20	1	0	0	0	1	0	0	0
Carm1	MGLibA_08063	CTGCAGGATCGCACGCTGGT	1765	205	0	7	1	250	0	0	7	49	0	0	0	0	2	18	16	0	7	0	1	1	0	2	0	0	0	0	2	3	0	0	0	0	0	0	1	0	0	13	3	0	0	2	1	0	0
Carm1	MGLibB_08061	TGAGGACGCTGTTGCAGCCC	4353	397	0	0	0	1	1	104	14	7	2	5	1	12	31	39	13	3	0	3	2	34	2	38	3	0	0	5	1	0	0	0	0	13	22	12	0	2	0	4	0	0	0	30	1	0	12
Carm1	MGLibB_08062	CCTTGTCCTTGAAGTCCGTG	7248	1028	14	4	40	22	20	16	10	0	38	8	158	7	3	72	47	7	14	19	12	10	224	112	4	14	32	3	11	2	3	5	7	6	13	10	0	3	16	7	44	2	213	4	7	18	71
Carm1	MGLibB_08063	ATCCAGTTTGCCACACCCCA	4008	364	1	0	62	7	6	1	4	0	65	5	0	1	26	4	9	0	12	2	2	36	2	28	0	6	1	0	3	0	0	0	0	1	5	0	0	0	1	1	15	37	1	8	4	1	0
Cbx1	KY013284	AGGTGGAATATCTTCTAAAG	631	158	0	9	0	3	3	0	0	0	0	1	23	10	1	0	15	1	1	0	2	0	1	0	2	7	0	0	5	0	0	6	0	2	57	0	0	0	4	7	0	1	0	0	6	1	0
Cbx1	KY013285	GAATATCTTCTAAAGTGGAA	393	34	1	0	0	0	0	0	0	0	0	6	1	9	147	0	0	0	0	0	0	0	0	0	5	0	0	0	0	0	0	0	0	0	0	1	39	0	0	0	2	0	0	2	0	0	0
Cbx1	KY013286	CATGAGACAGATAAGTCAGA	1075	196	0	90	0	5	0	6	10	0	112	0	1	0	0	0	1	0	3	16	3	43	2	5	4	2	0	6	0	0	3	74	1	0	355	0	0	0	0	4	0	0	2	1	0	2	0
Cbx1	KY013287	GAAACTCAGCAATAAGGTCA	1379	288	1	1206	27	8	4	5	61	99	253	0	0	63	207	39	6	2	4	4	27	1	7	3	0	0	5	0	0	12	2	7	1	88	3	3	0	2	20	2	0	0	6	0	81	10	1
Cbx1	MGLibA_08238	GTAGCTCCAATAATCCGCTC	1848	434	64	0	1	8	3	25	9	0	2	1	1	4	1	0	6	9	0	1	3	8	1	2	7	8	1	1	21	3	0	0	0	9	3	3	0	0	23	0	1	4	2	4	1	3	0
Cbx1	MGLibA_08239	TTACAGTCAGAAAAGCCACG	1412	538	33	191	7	35	20	14	7	4	130	17	192	7	163	83	345	31	19	6	61	35	47	28	7	70	4	38	2	5	6	5	0	37	3	6	8	8	29	41	437	38	106	11	6	8	16
Cbx1	MGLibA_08240	AACCTGTGGGCACTTGACAT	3267	585	60	189	20	231	59	5	34	64	32	54	96	418	261	38	90	40	22	19	1527	10	64	44	31	29	19	3	16	3	108	29	23	10	3	24	10	6	0	6	14	44	104	6	196	0	5
Cbx1	MGLibB_08238	GTTTCAGTGAGGACAACACT	1643	253	8	0	0	1	10	1	5	0	15	1	4	1	1	1	0	2	8	2	0	1	2	2	5	0	0	6	2	2	1	36	5	0	18	4	2	0	1	0	0	3	9	1466	4	1	1
Cbx1	MGLibB_08239	AGCCAATGTCAAGTGCCCAC	2564	383	2	22	33	8	10	17	15	41	0	0	110	7	115	1	292	3	1	8	14	2	12	218	6	75	1943	26	3	9	0	3	1	0	8	1	21	1	0	2	0	2	1	33	1	1	0
Cbx1	MGLibB_08240	TGGTGGAAAAAGTTCTTGAT	1428	324	95	54	4818	5	5	0	0	2	6	2	12	5	3	61	1	0	0	0	1	3	18	2	21	2	0	17	2	0	378	0	2	8	0	15	0	3	2	1	52	745	9	206	5	3	0
Cbx2	KY013289	CTCCTCTTCCTCGGACGAAG	2798	469	0	14	71	2	2	11	2	3	2	0	2	85	6	9	385	2	8	1	2	5	11	4	9	3	2	20	1	1	1	0	0	1	0	0	0	39	0	0	0	4	75	3	1	0	0
Cbx2	KY013290	GATGGGTTTCACGGCCCCGG	2485	410	30	8	49	15	9	30	139	9	147	71	39	6	125	679	2	1	0	18	0	2	6	18	3	16	2	0	3	0	0	20	12	15	1	3	2	2	1	8	8	32	9	3	1	2	3
Cbx2	MGLibA_08241	GCGGTTCATGTAGTGTACGA	2539	604	7	104	42	61	311	9	62	0	27	249	29	27	128	9	7	2	193	4	3	1	8	10	8	176	6	5	41	0	6	4	4	18	9	3	39	58	14	2	0	1	22	8	6	7	528
Cbx2	MGLibA_08242	TTTAACGGTGTCCCGCTTGA	2586	616	31	291	437	108	79	27	671	35	95	282	1719	2389	465	122	34	141	20	83	172	32	207	184	362	540	3	11	1	1	6	2	9	9	9	0	9	5	13	3	19	4	35	4	4	2	4
Cbx2	MGLibA_08243	ACCAGCCGCGCCACTTGACC	4981	846	148	26	10	2853	48	83	12	22	31	378	30	2951	16	6	290	637	11	894	970	102	66	612	5	103	277	6	20	4	6	405	2	940	86	4	1	134	8	12	9	48	1561	27	4	9	47
Cbx2	MGLibB_08241	TCACCTTGAGCTTGGAGCGC	5287	969	23	790	11	65	26	1083	3	9	329	6468	1686	39	50	144	34	57	26	1079	20838	2860	41	764	1910	290	243	26	70	1698	10	47	139	31198	23763	21	921	111	33	27	1	701	289	304	333	9312	12
Cbx2	MGLibB_08242	GAGTTCTCACTTCTTCTGGA	1618	191	0	0	0	0	0	0	1	0	0	1	2	0	0	2	0	19	0	4	2	1	1	1	1	0	0	1	0	0	0	0	0	19	15	0	0	2	2	0	0	0	0	1	1	0	0
Cbx2	MGLibB_08243	GCAGGGCAAGCTGGAGTACC	3168	817	1	2	1	14	2	782	16	8	1912	44	3	68	8	683	17	2466	597	20	13	19	9	12	447	11	26	2866	8	8	4	4	54	15	1266	8	28	6	11	195	3	11	11	38	3411	19	2
Cbx3	MGLibA_08244	AACACAGTGCTGATAATACT	1210	99	0	0	1	0	3	1	0	0	0	0	0	9	0	1	0	1	0	0	2	1	1	5	0	5	0	1	1	0	0	0	0	0	0	0	0	1	0	0	0	39	0	53	0	0	0
Cbx3	MGLibA_08245	GTATACAGGCTGACAAACCA	1441	781	18	50	34	68	59	13	254	75	51	24	179	17	265	104	99	51	45	73	71	41	9	27	8	29	1338	195	85	43	18	127	3	81	44	39	11	17	36	162	158	95	11	9	18	27	17
Cbx3	MGLibA_08246	CAACAGGAAGGACTCGGACG	1827	345	7	15	6	0	39	5	9	8	203	10	2	9	4	2	7	16	30	108	38	13	23	5	7	5	2	1	0	2	2	5	28	4	3	4	3	0	2	8	1	2	8	3	14	1	10
Cbx3	MGLibB_08244	TAACTCTCCGCTGCTGTCTG	9593	2800	397	286	148	1285	2514	1225	107	2776	632	91	3393	948	440	1252	809	309	1446	221	242	1889	483	10900	47	474	58	3636	78	1629	369	268	2693	6063	607	41	36	160	367	41	69	78	438	231	16	30	400
Cbx3	MGLibB_08245	CTGTGAACCCCTTCCACTTC	4029	721	0	14	2	9	14	3	7	3	152	9	42	4	1	15	36	42	6	15	9	8	2	125	2	3	1	2	14	2772	2	6	3	692	43	10	1	0	18	4	0	519	16	36	2	0	2
Cbx3	MGLibB_08246	AAAATGGGAAAGAAACAAAA	97	17	0	0	0	0	0	0	0	0	0	2	0	0	0	0	0	0	2	0	1	1	0	0	0	0	0	0	0	0	0	0	0	0	0	0	0	0	0	0	0	0	0	0	0	0	0
Cbx4	KY013293	CTTGGCACGGTTGTCAGCGG	2120	488	0	2	7	32	5	23	54	1	87	83	20	27	5	12	28	134	4	5	36	6	2	37	0	102	5	0	5	0	73	19	2	1	272	3	2	0	17	4	22	0	5	1	5	19	7
Cbx4	KY013294	TTGGAGCGTCGGGCAAAGGT	1169	283	464	6	7	17	6	17	34	0	19	7	1	13	60	8	425	48	449	1	247	0	9	0	1	0	0	0	26	207	2	80	27	22	1	0	0	7	327	1	10	1	36	3	1	0	9
Cbx4	KY013295	CTCGGGGCCGTGAAGCCCTT	3037	1119	31	156	598	150	2407	3780	539	233	795	356	79	213	1267	423	471	51	4083	56	15	393	40	1599	129	315	15	19	8	111	67	14	1	172	46	13	12	344	16	79	93	8	10	36	226	16	72
Cbx4	KY013296	CGCTGACAACCGTGCCAAGC	3165	1071	4	36	75	3339	29	21	41	6	63	17	47	27	10	12	86	85	31	30	21	15	4	7	179	24	3	1	4	2	1	0	1	5	0	0	0	6	1	0	4	0	8	4	6	0	20
Cbx4	MGLibA_08247	CGACGCTCCAATGTTCTGAC	3707	456	58	19	68	481	89	6	199	9	6	2097	61	10	3	10	136	69	218	41	12	10	14	60	1213	46	3	0	107	1	1	4	2	16	7	2	0	18	1	48	0	1	0	2	1	0	3
Cbx4	MGLibA_08248	CACGGCCCCGAGGTAGCCTT	2500	205	0	1	0	19	1	21	1	1	16	0	2	0	2	0	9	48	20	3	1	2	0	0	0	239	0	8	0	3	0	1	0	1	0	2	0	0	0	36	3	0	3	1	0	3	2
Cbx4	MGLibA_08249	AGGGCCCAAGCCCAAACCGC	1540	535	2	18	1	68	11	11	24	6	213	18	9	62	53	82	102	6	19	172	45	21	55	4	215	4	1	4	9	4	2	6	0	21	3	1	6	1	23	0	53	0	6	4	1	0	2
Cbx4	MGLibB_08247	CACTTGCAAGATATAACACG	1824	481	2852	81	435	3115	7049	1210	352	679	4695	372	14481	1156	314	408	436	4481	817	2561	202	530	552	2084	156	6742	891	43	4324	3641	74	3106	245	148	2611	250	363	116	65	5365	42	40	475	425	400	331	6764
Cbx4	MGLibB_08248	TGCTGATCGCCTTCCAGAAC	3025	1043	9	233	166	39	85	255	2	58	143	37	213	363	58	462	181	2	253	265	68	16	330	526	19	638	3	2	179	46	3	15	10	24	13	9	23	66	0	2	3	3	23	3	6	10	2
Cbx4	MGLibB_08249	ACAGGGCAGAGTGGAGTATC	1845	366	5	0	0	6	10	1	0	4	7	8	0	0	1	23	2	108	3	0	7	1	1	147	96	0	0	0	1	0	3	0	0	0	4	12	1	10	1	0	1	4	0	6	13	1	0
Cbx5	KY013297	CAAAGCAATGATATCGCTCG	1626	529	8	131	3	34	116	12	83	6	25	0	0	2	9	1	15	8	1	11	3	3	2	4	9	4	0	0	0	1	1	4	0	3	0	0	0	1	1	1	0	6	0	2	5	0	23
Cbx5	KY013300	TTCCCAAGTATTGTGCTCCC	6201	1856	1348	113	87	230	561	75	59	54	122	499	42	92	117	171	160	7	137	17	33	30	16	197	28	366	12	47	16	4	34	37	22	233	95	49	248	1844	1843	6	6	94	27	15	20	17	5
Cbx5	MGLibA_08250	TAAGAACATTAAGTCACCGC	2293	566	572	309	22	29	245	13	20	85	479	6	91	184	12	19	144	63	59	56	57	38	14	67	139	193	257	18	52	133	113	14	89	114	52	34	24	20	528	52	3383	240	31	82	3	17	257
Cbx5	MGLibA_08251	GTTGGACAGGCGCATGGTTA	2562	682	3	4	3	29	22	2	54	0	509	15	17	3	7	5	2	27	3	14	2	1	19	22	49	2	0	0	9	0	0	0	69	0	1	4	10	2	4	0	0	7	10	9	5	0	4
Cbx5	MGLibA_08252	TTTAATATCATCAGCGCTGT	3233	608	12	118	225	1003	415	345	52	45	68	19	858	7	220	40	51	6	152	811	78	9	981	74	121	31	23	15	241	469	226	15	15	4	92	0	4	21	33	46	9	35	92	123	11	26	2
Cbx5	MGLibB_08250	AGCAAAGCAATGATATCGCT	1159	410	1	2	13	29	8	38	6	37	9	6	6	39	87	8	27	14	4	3	2	15	4	15	0	7	1	0	0	80	0	2	1	8	9	1	2	9	0	0	1	18	0	6	5	8	11
Cbx5	MGLibB_08251	AGGGTGAAAACAATAAGCCC	610	241	90	9	614	7	22	12	4	6	41	3	1	16	18	23	64	29	4	9	7	13	131	10	43	0	3	0	0	3	0	0	31	1	0	0	2	1	2	0	0	1	1	1	0	1	0
Cbx5	MGLibB_08252	AGCCGACAGCTCTTCTTCAG	2382	1377	79	301	174	36	415	150	115	51	58	30	74	76	179	52	74	60	177	249	61	61	10	181	20	91	15	4	37	6	6	233	13	406	24	16	115	7	27	221	2806	35	92	135	5	26	1236
Cbx6	KY013301	CCCAATGACCCGGTTCCGCG	4126	877	36	180	96	336	8	4	201	166	19	312	66	47	25	152	19	29	88	36	27	110	7	736	26	590	84	0	0	30	9	23	9	12	24	3	23	53	72	1	0	4	58	95	3	17	3
Cbx6	KY013302	CAATGACCCGGTTCCGCGAG	2491	562	62	28	9	12	5	1	12	43	5	4	152	255	0	8	8	2	22	2	2	5	4	157	14	55	0	3	0	56	9	0	0	3	4	0	41	1	2	4	0	7	9	1196	3	9	14
Cbx6	KY013303	CCGCGAGGGGACTTTCGGGC	6494	1999	6318	1248	1217	2472	4806	9819	2409	1045	25103	2007	1565	1685	1252	8339	901	28	4067	3684	251	1351	4366	20600	145	1975	12475	1079	309	2031	1505	967	6826	14903	3024	11708	6986	3037	13358	5920	6662	16932	6605	21579	1587	2490	6101
Cbx6	KY013304	GAAAGTCCCCTCGCGGAACC	2160	663	68	171	467	946	1080	828	461	84	69	428	238	1481	119	39	16	944	29	55	57	30	12	1221	20	678	3490	234	460	1893	256	29	111	357	630	62	73	21	296	1809	12	8629	385	20	463	251	49
Cbx6	MGLibA_08253	CGTGCGCATCATCAACCGTA	3809	697	39	26	131	39	4442	145	107	454	20	22	10	12	2212	6	488	35	353	89	6	32	180	20	17	16	34	2	5	156	6	11	92	2869	12	7	34	255	12	2	43	423	18	315	48	14	560
Cbx6	MGLibA_08254	CCCGCCCGAAAGTCCCCTCG	4684	1358	228	6617	796	1222	417	847	997	495	986	291	3194	1063	213	392	1098	1183	734	1948	203	1340	3910	1964	4853	2077	383	140	148	413	141	230	58	300	208	94	133	106	67	51	15	113	68	26	37	26	417
Cbx6	MGLibA_08255	TCAGGGACGCATCGAGTACC	6240	1621	573	220	569	1066	178	82	468	73	290	188	812	215	835	42	923	164	54	747	2105	270	214	211	44	6765	12	8	18	6	7	62	0	42	16	7	73	141	34	8	5	26	515	226	17	45	1837
Cbx6	MGLibB_08253	TCCAACTCACTTCTGCTCGA	4197	1277	108	131	1545	1692	189	84	2107	2040	76	208	384	263	283	194	485	98	99	751	54	48	206	865	565	1110	3164	53	71	44	655	259	329	9	1103	11	1495	14	72	14	269	160	22	57	12	280	54
Cbx6	MGLibB_08254	GACTCGGCAGGTACAGCACT	4398	1448	1946	868	2005	3691	6199	1961	3943	666	3323	1167	1999	714	1265	336	204	853	2351	4042	2182	4169	367	4113	64	508	43	111	1167	539	3232	1440	365	2183	176	1443	2748	164	196	519	4739	124	763	7355	59	100	137
Cbx6	MGLibB_08255	GAAAGGGAACGTGAGCTGTA	2716	833	65	4	30	38	328	166	14	509	1355	31	29	8	106	24	142	26	24	11	30	14	20	86	35	33	14	5	10	7	4	1	3	2	5	2	6	2	9	3	9	5	26	303	2	4	4
Cbx7	KY013307	GAGACCGAGCCTCGGGGTAT	1686	187	1	0	0	3	53	0	0	0	5	3	0	22	0	1	1	4	2	0	0	0	1	1	0	5	2	0	0	3	0	0	0	0	0	1	0	0	6	0	0	0	1	1	1	0	1
Cbx7	KY013308	GAGGAGAGAGACCGAGCCTC	1092	138	0	2	25	0	172	14	73	74	46	0	1	28	6	0	2	107	3	3	0	16	0	8	882	54	0	0	0	0	0	2	0	1	0	0	0	0	0	0	5	0	0	31	0	0	0
Cbx7	KY013310	CGTAGGCCATGACAAGGCGA	2315	2401	33	35	495	485	696	340	380	40	398	348	665	239	378	68	190	183	27	19	485	15	76	266	48	57	6	20	18	24	5	1	1	12	5	8	46	49	81	14	0	53	14	119	5993	17	11
Cbx7	MGLibA_08256	ACCTCTCTTCCTATACCCCG	5978	1595	13	360	64	486	38	125	766	208	1544	178	118	99	51	82	151	229	204	331	589	519	466	253	124	237	8	42	25	44	4	98	18	16	71	22	30	25	121	281	8	142	86	161	177	133	78
Cbx7	MGLibA_08257	GCCTATGGAGCAAGCCCCCG	3251	861	51	677	26	47	45	28	151	200	45	1215	123	1920	273	203	78	8	27	240	1191	27	189	205	212	279	88	2	56	4	2	166	6	12	32	4	52	12	6	3	16	268	9	11	5	3	14
Cbx7	MGLibA_08258	CTTGGACCCTCGCCTTGTCA	6786	1588	1337	84	538	19	27	98	30	27	5	39	4110	476	88	23	209	14	348	9	44	57	32	162	44	187	55	46	30	6	14	26	12	128	10	27	6	1447	13	8	182	5	12	55	9	14	50
Cbx7	MGLibB_08256	GGGTCCTTACTTCTCCTCGT	2930	615	20	36	66	12	142	14	1156	4	6	15	11	260	30	2	3	9	2	16	3	19	1021	18	0	48	0	0	3	0	1	22	2	4	28	1	25	168	437	0	11	2	5	6	5	34	3
Cbx7	MGLibB_08257	GGAAGAGAGGTCCGAAACCC	1023	138	2	0	0	0	0	10	2	0	0	0	0	0	0	2	11	0	0	1	2	0	0	1	6	4	1	0	0	0	0	0	0	0	0	2	0	0	0	2	0	0	2	0	0	0	0
Cbx7	MGLibB_08258	CCAGACGTTGTGCAGACCCC	4707	1601	151	408	190	772	298	1496	472	75	1156	551	448	120	2205	118	351	830	52	755	38	542	126	631	246	664	17	95	113	8	10	323	29	50	36	70	55	42	86	29	281	50	18	112	47	80	1036
Cbx8	KY013311	GGGTTTCGGTCCTCGTTTCT	1559	314	43	42	3	34	21	5	37	6	11	56	631	14	120	6	130	138	3	2	3	6	12	31	14	156	0	1	15	7	0	1	4	2	0	1	4	1	1	3	0	1	7	2	0	1	0
Cbx8	KY013312	CTCGGTCCCGGTCCCGAGGT	2985	475	4	1	7	1	54	5	400	3	11	173	6	170	351	70	15	26	28	385	7	20	6	409	1494	10	2	7	0	0	11	5	398	216	5	79	0	5	8	82	0	8	2	10	1	5	0
Cbx8	KY013313	GGATTTGGCGTCTACTTCCA	2425	338	29	7	0	30	1	27	34	656	43	28	1	10	4	7	6	4	0	1	3	40	5	0	1	20	27	2	17	4	90	2	0	5	7	1	0	7	1	0	17	13	1	2	0	9	31
Cbx8	KY013314	GCTTGGGTCCTCGCTTTTTG	7351	2466	9759	14424	22655	9759	11841	13329	21429	7872	13417	17663	18609	20559	22853	10888	13944	14514	16119	23990	12666	31524	15961	19537	18143	13524	19977	26685	12604	4259	3541	15409	31209	9757	7785	8354	4427	7115	7803	3802	4478	1466	14198	9015	3500	4422	13736
Cbx8	MGLibA_08259	GCGCCCCCATGTCCCGATAC	5410	1439	171	1347	264	455	1760	640	353	267	404	419	655	322	159	364	620	1139	969	281	590	146	543	230	330	691	47	141	142	31	94	221	223	132	281	56	39	187	138	240	127	52	357	235	407	138	28
Cbx8	MGLibA_08260	CTCTATGGCCCCAAAAAGCG	1024	140	0	0	0	0	0	1	2	0	0	8	0	0	0	0	13	0	1	1	14	0	73	3	0	0	0	0	0	0	0	0	0	0	0	0	0	0	0	0	0	0	0	0	1	0	0
Cbx8	MGLibA_08261	GCCTGAACTATGTCGAACCC	3895	1550	64	28	244	227	85	53	314	1063	50	20	8	27	85	493	106	2503	20	12	27	51	117	732	33	179	48	5	160	10718	7	15	492	51	357	7	17	3	1	17	30	7	25	6	17	22	10
Cbx8	MGLibB_08259	GCATGGAATATCTCGTGAAA	1302	234	2	10	0	0	18	2	113	5	0	0	1	6	5	0	6	4	1	3	0	1	2	24	0	3	0	0	4	1	0	14	0	0	0	0	0	0	3	1	0	0	3	4	0	0	0
Cbx8	MGLibB_08260	TTTCCTTTAGGTACAGCACG	3443	749	26	8	4	60	22	8	45	6	19	3	27	1	3	0	17	7	9	7	4	2	12	27	64	38	4	0	13	99	1	3	1	1	1	5	17	0	0	1	1	46	4	8	8	0	1
Cbx8	MGLibB_08261	TTTCTTTAGGGAACGGGAGA	733	251	1	1	32	14	5	0	11	9	17	13	12	7	49	71	22	33	14	1	16	80	40	8	10	4	2	1	3	0	0	2	0	1	2	4	3	1	0	4	0	3	0	0	2	0	1
Ccdc79	KY013883	TTCATTCTTAAACTCAGTTA	2218	575	84	4	111	8	24	3	42	2	0	14	23	54	5	3	0	14	19	4	6	6	2	0	7	11	1	9	0	0	1	9	0	535	4	2	21	2	75	12	8	7	3	11	172	0	2
Ccdc79	KY013884	CTTTGTCTCTTCGGGTGGAC	4900	1390	556	273	1038	2135	406	3047	293	52	705	44	257	1698	83	542	241	24	797	2261	82	164	1002	815	40	328	54	62	271	741	34	21	121	80	333	118	78	1204	2930	313	4746	64	1869	210	83	562	243
Ccdc79	KY013885	AATTATTTCAAGATTTAACC	663	78	1	1	126	1	0	0	2	0	0	0	1	0	5	0	0	0	0	0	22	0	10	0	0	0	0	0	0	0	0	0	0	6	0	0	0	0	1	0	0	0	0	2	0	0	0
Ccdc79	KY013886	ATTTATTTCCGGGAAATTGG	906	327	1	2	0	0	1	0	4	4	2	3	2	3	8	2	14	2	21	913	21	8	0	0	9	2	0	0	2	0	0	5	0	0	0	0	0	1	0	2	0	0	2	1	26	0	1
Ccdc79	KY013887	GGTATTTATTTCCGGGAAAT	597	127	4	0	0	0	13	18	0	0	2	2	3	260	4	4	0	0	1	2	2	9	0	1	2	1	0	1	0	0	0	2	0	4	5	0	6	1	0	0	0	0	0	4	586	2	1
Ccdc79	MGLibA_08649	ATCATCATTAGTTAAGAGCC	1479	550	252	18240	233	6530	6898	555	2725	7617	2299	4394	517	4866	4603	2345	1015	1146	253	644	1006	459	587	1307	3746	992	2918	45	1837	765	2152	86	1122	1225	119	296	120	275	16	1018	45	233	248	318	28	194	53
Ccdc79	MGLibA_08650	GAAGCAGCCTTATACACATT	1650	622	10	351	28	0	6	204	5	3	8	8	4	382	167	63	101	11	0	5	122	6	5	51	35	2	5	0	3	0	114	5	3	1	1080	1	7	0	75	57	0	0	2	5	12	4	1
Ccdc79	MGLibA_08651	GGGCAACCCTTTGTCACAAA	994	285	6	95	6	7	3	1923	6	3	10	6	7	0	0	2	5	1	31	21	102	10	102	0	27	1	6	4	146	7	914	2	22	6	731	0	11	233	114	3578	12	5	2	9	8	11	3
Ccdc79	MGLibB_08649	ACATCAAACCACCAATTTCC	2890	696	2	54	58	15	69	8	48	8	908	77	100	38	2909	23	109	141	398	32	39	61	161	36	28	35	2	0	1	1	298	2	2	27	403	14	30	162	487	76	10	69	7	22	209	12	1796
Ccdc79	MGLibB_08650	GACATTCCAACAGTAACTTC	2275	542	4	155	5	447	21	14	93	1	54	96	15	19	389	164	7	3	13	32	82	7	8	14	10	21	0	0	63	1	12	5	0	27	3	4	0	0	3	0	56	143	9	1	2	12	12
Ccdc79	MGLibB_08651	AAGTTCTGTCACAGATGTTC	1718	260	42	21	25	259	13	881	20	65	639	34	131	408	99	16	484	9	73	1	26	11	96	119	217	984	18	0	1	3	4	3	2	7	19	43	0	3	7	17	1	4	8243	2	83	19	41
Ccl12	KY014039	TCACAGCTTCCCGGGGACAC	4194	1327	145	286	225	260	49	387	37	147	671	75	72	273	16	82	1168	168	182	17	237	54	8997	32	76	102	12	0	29	4	9	11	17	5	21	32	41	184	29	3	18	1	46	376	8	31	6
Ccl12	MGLibA_08745	TTAAGCAGAAGATTCACGTC	2414	604	8	124	13	21	217	2	29	7	8	125	5	32	9	67	5	34	49	16	0	2	8	16	4	4	7	0	3	9	3	2	7	2	57	2	2	1	3	3	2	1	5	17	5	0	3
Ccl12	MGLibA_08746	TTTGAGACGTCTTATCCAAG	2793	981	9	55	87	25	25	12	18	83	511	25	45	24	367	388	2577	45	156	54	42	33	6654	164	8	34	4032	64	33	4	4	12	23	49	2	8	48	1615	10	40	7	1983	427	1	464	73	37
Ccl12	MGLibA_08747	ACAGATCTCCTTATCCAGTA	1956	503	3216	26	216	122	107	2	232	25	179	35	478	59	7458	137	92	5	61	14	522	101	16	840	19	4	4	3	0	16	3	2	29	21	4	52	13	1	2	1	170	326	190	56	981	1	6
Ccl12	MGLibB_08745	ACATTATAACAGCACGTGAC	2678	602	3	3	56	1	2	16	0	0	4	95	19	6	1	11	8	14	3	7	62	13	46	2	279	89	1	0	14	16	6	74	0	8	1	0	0	5	1	11	3	7	0	1	3	0	11
Ccl12	MGLibB_08746	CCTGGTCCAGCCAATACCTG	4181	1140	56	482	229	94	81	21	127	10	19	10	1149	27	369	245	153	11	74	285	991	150	2611	300	45	34	6	15	34	4	18	43	38	25	260	151	4	21	10	21	342	181	83	23	29	437	43
Ccl12	MGLibB_08747	TGATGGTGGTAGCTATGAGC	3384	1070	36	119	7	47	28	21	28	3	89	4	13	23	8	154	20	17	28	10	19	6	114	2032	4	70	14	0	5	2	1	5	5	3	6	4	3	0	2	4	1	1	45	2	5	2	0
Ccl17	KY014040	TCAAAGGGGCCATTCCTATC	3773	1041	700	95	14	75	152	10	15	9	13	3	40	27	30	141	140	17	11	31	43	11	797	35	12	8	4	1	1	2	0	2	2	0	36	5	34	4	1	1	3	8	2	25	6	5	19
Ccl17	KY014041	CCTACATTGGTGGCTCGAGC	3221	903	124	604	188	512	505	21	245	90	84	28	74	118	299	155	252	310	121	760	151	781	282	18	276	390	196	174	2515	763	14	618	16	70	43	258	131	120	8	135	24	40	3597	203	5234	84	109
Ccl17	KY014042	GCAGCACTCTCGGCCTACAT	4283	1226	18	69	1812	1580	16	126	421	85	8	255	629	830	479	3185	49	407	65	145	393	13	301	176	16	22	193	4	21	1118	200	724	9	11	11	32	21	206	2	20	12	179	4	3	6	3	16
Ccl17	MGLibA_08748	GCACTCTCGGCCTACATTGG	5371	2090	156	739	200	1482	52	563	102	132	292	107	150	480	91	167	139	46	59	95	1147	327	834	105	256	718	9	11	6	6	13	1330	19	174	41	4	104	26	60	42	1	15	42	36	28	18	201
Ccl17	MGLibA_08749	TGGCCCCTTTGAAGTAATCC	4699	1719	1074	181	6	373	426	31	232	151	4594	1867	185	303	103	389	75	29	143	151	22	116	28	472	242	145	816	22	21	25	16	108	15	28	58	14	5325	1805	27	284	5	5	434	37	11	0	116
Ccl17	MGLibA_08750	GTCACTTCAGATGCTGCTCC	4492	1545	6848	424	40	518	220	118	73	19	232	24	69	22	188	91	342	84	4789	4091	91	441	6495	1626	21	74	2342	79	3751	1285	12	17	5	8908	36	10	6048	695	6	45	150	8	240	38	30	39	5
Ccl17	MGLibB_08748	TCAGATTGGTGAAAAACCCA	1077	404	5	50	8	4	0	1	10	8	2	5	9	9	75	21	106	71	5	3	2	12	37	7	1	4	2	0	0	3	18	1	15	2	0	2	6	3	23	2	0	1	30	3	1	1	31
Ccl17	MGLibB_08749	CAGCGGGAAGGTCATGGCCT	3300	1018	331	1610	152	510	2008	280	1960	401	74	134	471	2145	369	552	105	210	2116	507	1076	91	710	112	8688	1432	2	5	111	29	8	57	1	27	64	30	7	950	5	91	23	27	460	28	1975	1598	51
Ccl17	MGLibB_08750	TTTCTGCAGCATGCCAGAGC	4126	1229	47	75	31	211	617	570	83	116	36	597	4	39	33	17	64	128	132	9	83	8	20	117	179	48	232	0	27	475	9	2	38	9	137	5	6	82	35	1	6	727	1691	95	12	5	8
Ccl2	KY014044	GATGATCCCAATGAGTAGGC	1643	291	79	16	10	215	13	17	1	4	92	1	0	0	24	5	3	2	7	0	157	1	5	0	241	3	1	5	0	68	0	0	4	2	3	1	1	2	2	0	0	0	95	6	1	0	0
Ccl2	KY014045	AGCTCTCCAGCCTACTCATT	3811	1313	5	138	15	30	28	15	81	28	1982	12	43	405	73	35	14	25	20	144	129	10	194	315	246	212	2	3	114	8	38	4	13	1	1	4	7	6	10	2	32	6	6	9	7	0	24
Ccl2	KY014046	TCTGGACCCATTCCTTCTTG	7628	2223	960	74	248	144	99	364	121	20	14	26	73	384	69	861	116	194	3744	35	227	44	54	36	180	389	44	137	20	0	29	39	388	297	317	3285	7	58	14	47	14	159	161	153	122	13	28
Ccl2	KY014047	GTCTGGACCCATTCCTTCTT	5715	1670	168	55	69	147	43	46	133	28	306	29	137	223	205	228	107	256	165	16	50	20	27	55	286	274	155	12	0	5	26	25	102	29	14	103	4	15	174	34	994	85	298	50	11	3	26
Ccl2	MGLibA_08787	ATCTCATTTGGTTCCGATCC	4946	2140	38	243	1044	437	614	1123	265	382	737	84	96	463	27	977	2283	68	128	1051	66	400	216	344	108	185	5	38	232	91	3	19	131	23	2003	77	44	303	71	207	333	38	415	428	16	151	33
Ccl2	MGLibA_08788	TGCTGTTCACAGTTGCCGGC	3677	1280	10	148	10	19	66	47	24	18	30	35	14	19	159	357	5	16	54	19	107	8	6	123	23	40	5	3	33	4	8	13	2	12	6	4	10	7	16	4	2	7	10	183	7	0	11
Ccl2	MGLibA_08789	AGCCGGCAACTGTGAACAGC	2118	1260	144	367	105	174	98	179	180	393	129	170	143	70	55	22	230	225	88	132	1449	391	72	322	75	901	5	6	21	160	13	84	12	19	12	55	63	20	13	2	5	22	36	360	6	4	9
Ccl2	MGLibB_08787	GCTGGTGAATGAGTAGCAGC	1835	471	2	51	2	4	7	7	58	13	86	3	3	193	104	3	16	220	9	17	132	45	5	16	8	12	6	0	16	0	1	2	0	0	3	4	0	24	2	1	3	0	1	2	1	4	10
Ccl2	MGLibB_08788	GTGCTGACCCCAAGAAGGAA	771	553	17299	15776	49423	18025	7757	5617	24778	7313	9634	5676	13135	11580	13586	11025	17474	4268	7226	12923	25933	5750	11452	20744	7106	20136	19444	3612	21221	19828	4515	28907	46475	8359	17664	20315	3897	8368	3941	3847	1281	3495	2989	31495	4764	2161	13598
Ccl2	MGLibB_08789	GCAAGATGATCCCAATGAGT	2348	719	202	7	3	24	2	6	75	79	12	104	10	8	133	306	120	27	12	6	7	48	42	2	89	57	1	0	32	0	5	4	42	6	8	1	4	1	3	9	14	1	17	0	1	1	2
Ccl5	KY014076	GTAGAAATACTCCTTGACGT	2165	370	10	12	182	54	116	122	5	303	2	2	11	5	177	21	14	4	38	24	0	13	5	297	40	1	0	0	4	3	2	123	1	1	0	0	1	1	2	5	4	78	126	2	0	17	8
Ccl5	KY014077	CACGAGGCAGCGCGAGGGAG	2124	1096	4	26	71	50	332	19	24	1	157	4	12	17	20	11	20	14	6	24	8	49	5	193	60	9	0	0	7	0	2	0	8	7	23	28	71	5	1	2	0	6	1	33	2	9	1
Ccl5	KY014078	GCTGCCTCGTGCCCACGTCA	6782	2756	1345	7108	152	2029	1758	350	2892	128	292	9573	2164	2319	1653	2783	479	2447	3767	782	209	505	9575	461	176	1317	1210	374	928	505	564	2367	387	659	2340	3264	4816	8527	605	904	2834	333	310	1433	148	2183	125
Ccl5	MGLibA_08796	GACTCACACGACTGCAAGAT	2222	541	2	12	58	7	26	25	14	6	7	17	49	1	34	12	68	8	455	127	321	1	31	29	11	1	9	0	1	0	11	6	0	2	1	1	2	41	0	1	38	0	328	8	0	1	0
Ccl5	MGLibA_08797	TGTAGAAATACTCCTTGACG	2429	618	265	89	139	1433	38	85	63	664	111	2608	74	116	391	865	194	8	246	35	275	15	263	4282	204	38	31	4	474	2757	367	21	0	538	47	16	22	3	4	94	1	4	2107	14	5	0	6
Ccl5	MGLibA_08798	CCTGCAGGTTTGTCACTCGA	4934	1533	39	728	171	28	299	9	618	50	38	20	52	211	41	261	168	48	41	291	61	1028	73	194	806	13	7	1	6	4	2	5	28	1	22	6	5	5	33	24	28	15	247	6	8	2	2
Ccl5	MGLibB_08796	CTCGACTTACATGGTGAGGC	2725	1021	14	30	63	82	25	435	6	3	808	126	10	61	12	15	43	11	474	4	142	13	2013	796	4	118	5	73	3	3	243	5	3	32	491	11	1	12	13	2	6	220	12	7	252	6	1900
Ccl5	MGLibB_08797	TCAAGAATACATCAACTATT	1518	693	3	73	16	4	105	14	11	2	3	4	23	109	3	5	56	10	6	2	12	2	10	48	14	43	1	0	1	4	4	3	1	3	5	1	0	1	20	3	0	0	152	8	2	0	6
Ccl5	MGLibB_08798	TGCAGAGGGCGGCTGCAGTG	3304	662	12	48	5	18	12	9	246	5	137	38	10	45	12	34	198	16	5	4	5	9	254	96	7	304	12	0	140	7	0	1	3	25	40	3	1	0	169	7	0	6	7	6	7	0	3
Ccnt1	KY014215	CTTCGAGTTTAAACGGAGGT	871	526	6	555	1	74	94	89	482	8	1	5	123	3	15	12	1582	34	71	14	30	3	5	11	42	20	6	1	15	4	0	4	3	48	48	1	19	3	0	9	4	5	12	60	2	24	2
Ccnt1	KY014216	TTCGAGTTTAAACGGAGGTT	1638	398	13	15	112	38	221	2936	7	37	14	43	178	74	86	11	28	172	10	85	498	11	27	262	4	50	1	2	812	13	5	26	15	1266	10	2	9	0	13	15	1	3	5	583	152	0	2
Ccnt1	KY014217	ATCGAGCAGTCTAACTAGTG	2529	331	1265	13	739	1	642	0	1	29	24	15	42	3	48	7	266	6	4	161	2	197	19	5	46	9	11	6	130	0	7	0	0	5	40	1	8	5	0	35	0	108	6	3	1	2	1
Ccnt1	KY014218	TGCTTCGTCCTAGGCGTACC	3437	629	9	2	21	17	39	0	23	4	4	36	8	35	37	24	8	65	77	2	6	7	12	3	76	2	1	9	1	6	0	0	0	1	125	17	1	0	1	6	4	3	174	4	10	2	1
Ccnt1	KY014219	GGCTGAAACGTATTCGGAAT	1091	139	0	0	0	4	2	1	78	1	1	0	0	0	0	0	0	85	0	1	0	12	0	0	0	0	0	0	0	0	0	0	0	2	0	2	0	0	0	0	0	0	0	0	0	0	0
Ccnt1	MGLibA_08889	AAGTGCACCCAGCTTGTTCG	2300	171	1	0	0	1	17	1	0	0	5	0	0	0	1	37	7	0	0	0	0	4	2	6	0	0	0	22	1	0	13	1	0	0	0	4	0	0	0	1	0	0	0	2	102	1	2
Ccnt1	MGLibA_08890	GTTACTTACCTCGAACAAGC	1350	205	20	23	3	115	28	7	0	0	0	78	84	29	4	89	12	14	0	24	5	6	0	2	31	1	0	0	4	0	3	0	1	7	26	3	0	0	2	0	0	1	1	0	0	2	4
Ccnt1	MGLibA_08891	CCAGATCTTGAACTTGTTGT	2435	230	3	0	0	9	51	0	3	0	0	0	9	6	6	6	0	7	2	1	1	2	0	54	5	0	0	0	0	0	0	0	0	0	4	1	0	0	0	0	0	4	0	1	2	0	0
Ccnt1	MGLibB_08889	ACTTCCTGACACGAGGAGTG	1967	277	1	0	1	3	107	13	30	2	5	42	0	0	2	368	29	10	1	2	22	6	1	2	1	3	418	11	4	0	27	0	0	2	9	1	2	0	3	15	0	1	8	1	4	4	36
Ccnt1	MGLibB_08890	CTCACCTCACTCCTCGTGTC	9818	1728	120	759	258	1241	44	63	268	297	761	221	483	170	180	58	280	202	58	29	31	31	758	32790	1072	195	66	11	759	276	34	10	48	2	27	191	16	73	246	37	23	61	57	108	99	134	42
Ccnt1	MGLibB_08891	CCTACAACAAGTTCAAGATC	1039	100	0	0	2	7	0	15	0	906	1	0	2	1	17	9	690	1	0	4	20	0	19	15	25	0	0	0	3	0	1	106	3	0	3	0	1	0	0	0	0	0	1	0	0	0	0
Ccnt2	KY014220	GCAGCTCTAGGGTAACCGTG	1538	293	12	1434	0	23	0	7	0	0	0	0	4	4	0	0	3	0	0	1	1	0	17	3	7	18	0	2	587	1	0	0	4	22	0	0	0	5	0	0	7	0	0	7	0	0	1
Ccnt2	KY014221	TAGCAGCTCTAGGGTAACCG	1501	209	3	71	3271	0	0	24	6	10	1	36	5	0	72	20	3	4	0	23	1	4	43	0	56	0	88	3	2	10	321	1	127	15	0	0	0	4	1	2	2	3	0	2	2	0	1
Ccnt2	KY014222	GGTTGAAGAGGATTCGAAAC	866	373	13	116	76	46	738	47	26	1202	54	5	27	31	14	7	116	54	104	5	9	61	12	75	833	42	0	2	35	3	6	4	3	7	96	8	6	5	19	0	0	1	7	8	4	3	0
Ccnt2	KY014223	TGAAGAGGATTCGAAACTGG	1326	193	7	9	9	4	68	14	0	4	0	24	21	80	4	11	0	79	18	6	5	4	9	224	6	50	0	0	2	0	0	0	0	2	79	3	0	23	5	232	8	24	1	6	0	2	0
Ccnt2	KY014224	GCAGGGAACGTTGATGTTGA	1922	891	3	1	3	0	64	49	54	6	9	10	5	40	6	23	12	5	42	31	15	5	99	6	217	2	9	2	3	2	0	12	1	2	30	1	0	0	1	1	4	3	1	4	11	1	1
Ccnt2	MGLibA_08892	ACCACTCACCTCTTACTAAC	3722	838	26	11	67	145	8	21	99	28	89	26	4	7	51	118	21	217	22	44	63	55	8	280	72	6	3	7	1	11	1006	4	11	34	24	2	0	5	2	7	23	4	9	5	15	15	2
Ccnt2	MGLibA_08893	CTGCGATTGTTTATATGCAC	3317	753	27	54	125	102	7	20	3	4	21	1810	2	72	386	3	48	48	5	1	8	3	37	14	7	122	2	0	2	2	2	0	392	5	1	2	18	0	2	1	0	0	5	27	4	0	0
Ccnt2	MGLibA_08894	AAATGCACCCAGTTAGTAAG	1491	269	39	103	2	152	75	13	20	18747	64	296	433	11	27	75	10	23	4232	404	498	3	23	3948	875	0	5880	72	9	15	1531	27	21	188	10709	10	549	215	627	40	12959	25	3063	33	2	25	51
Ccnt2	MGLibB_08892	ACCCAGTGTTTGTAGCATTA	2216	600	43	71	386	453	265	195	22	27	3	27	12	95	4	40	2	12	147	9	59	3	16	8	5	6	5	0	139	2	0	1	2	4	48	0	5	8	19	54	5	25	1	134	1	0	2
Ccnt2	MGLibB_08893	GCAGCCAAAAACAATGCAGT	647	53	3	0	0	0	0	0	0	0	0	0	0	0	0	1	11	1	4	366	0	0	0	2	0	0	0	11	0	0	0	0	1	0	27	0	0	0	4	0	0	0	0	1	0	0	19
Ccnt2	MGLibB_08894	TCTTCAGCAGACTCAAGAAC	1592	287	0	5	709	48	8	27	2	2	56	9	9	8	41	6	8	29	70	3	4	61	9	0	4	1	2	1	4	0	4	0	0	5	2	4	5	5	3	3	0	0	0	5	0	1	9
Ccr4	KY014264	TCCAAAAACCCACTGGTCGG	1299	290	37	17	942	517	2	18	110	5756	13	2312	11	2188	35	15	639	2244	7	7	446	9	646	85	14	25	25	34	16	20	41	4	0	42	99	4	16	33	13	0	68	55	38	261	4	18	98
Ccr4	KY014265	CAGCAGGTACACGTCCGTCA	3414	1535	1234	1309	1119	16497	495	2634	1241	4088	622	1248	666	2844	3466	549	7995	657	1528	1588	769	130	416	6462	7633	4911	463	200	189	67	1511	381	1027	2406	7380	1007	3305	1802	506	359	3749	875	2758	3117	578	170	1107
Ccr4	KY014266	ATACCTGGCCATCGTGCACG	4859	1245	51	197	93	139	172	47	529	89	168	70	61	86	378	97	39	43	51	19	11	37	65	94	137	177	41	10	579	70	61	230	49	61	10335	3	7	76	617	109	11	40	155	928	84	38	7
Ccr4	KY014267	CTACTACGCCGCCGACCAGT	4565	1073	467	151	368	7781	121	61	1346	49	700	17	148	40	329	223	614	136	130	200	215	42	625	482	26	286	11	8	250	18	30	4	5	24	16	13	111	18	74	149	14	13	21	47	8	2	33
Ccr4	MGLibA_08925	TGTACGGCGTCCAGAAGCCG	3868	1233	389	3018	1653	10286	4281	1337	1073	11368	818	755	14384	1438	108	690	4310	2626	2516	1276	2295	2293	932	29940	414	377	6	14	13	24	2514	549	264	409	239	9	4097	53	822	24	75	6	226	7656	6081	22	660
Ccr4	MGLibA_08926	TCGTCGAGTTGACCGAGTAC	5606	2187	45	592	332	262	230	40	627	11	104	445	261	95	157	87	103	83	395	724	78	76	38	891	621	215	16	45	110	387	298	626	131	102	283	85	21	458	2183	56	95	44	97	755	111	62	377
Ccr4	MGLibA_08927	AGTGCGCATGATCTTCGCCG	5506	1235	28	77	863	179	181	179	2226	49	10	267	618	287	413	330	30	191	162	13	8	144	101	80	6	453	9	1	102	1	23	5	0	45	6	14	25	42	6	5	0	1968	31	91	16	0	22
Ccr4	MGLibB_08925	GTACCTAGACTACGCCATCC	4073	1203	43	399	137	2	158	2416	65	7	19	45	82	63	131	13	34	379	37	55	13	287	15	17	345	213	2	2	5	5	7	7	7	7	1027	8	37	0	3	42	1	4	6	20	7	3	50
Ccr4	MGLibB_08926	GCACGCGGTATTCTCCTTGA	3640	1060	33	189	90	159	31	177	83	84	51	72	369	33	10	20	18	417	195	24	69	91	259	257	369	35	17	20	683	186	4	9	14	498	196	396	10	61	287	73	292	60	9	44	37	194	131
Ccr4	MGLibB_08927	GCTACTACGCCGCCGACCAG	2688	705	27	61	14	231	4	10	47	13	86	1411	9	20	14	26	26	68	8	20	10	5	21	39	14	516	0	7	74	4	1	0	3	41	15	7	6	0	13	8	6	2	1	43	23	2	3
Cd27	KY014503	TCTTACCTGGCTCACACATC	5037	1865	36	30	46	83	54	26	91	30	186	107	20	27	288	111	176	28	130	60	137	34	457	310	1387	121	11	9	49	25	40	6	18	16	5	19	15	4	4	29	17	7	49	61	5768	4220	3
Cd27	KY014504	GACAAACACTACTGGACTGG	4508	477	51	0	0	33	24	5	23	13	6	28	0	0	3	2	2	10	3	2	3	0	64	2	0	3	29	0	8	56	0	0	3	0	6	0	1	32	1	0	0	5	142	9	1	0	0
Cd27	MGLibA_09096	CTGGCTATAGACAGTCGAGT	3277	461	48	551	25	321	109	197	37	362	1856	31	119	483	86	46	48	152	5819	4569	213	266	641	68	21	39	22	18	10	733	53	12	2	47	96	17	426	52	16	59	11	30	108	75	4	36	0
Cd27	MGLibA_09097	CGGGTTTCCGGTAGTCCTCC	5509	2130	38	484	407	389	59	77	213	35	73	1454	195	148	36	85	95	134	30	339	276	59	2759	222	421	51	70	4	42	22	26	16	45	38	308	117	12	5	15	27	1	30	865	24	20	15	5
Cd27	MGLibB_09097	GCTGTCCAGACAAACACTAC	2053	708	399	11	8	2535	32	14	19	12	0	25	44	366	336	10	11	792	40	9	7	7	58	2	58	140	0	22	4	263	4	1	28	12	5	1	7	9	0	3	28	27	4	7	27	4	48
Cd27	MGLibB_09098	TTGCACAGATGAAGACCGGC	2045	920	8	34	24	47	83	55	21	12	497	17	78	205	288	124	2	70	23	64	25	385	116	38	12	106	4	1	1	19	3	3	7	2	15	0	0	3	725	2	3	15	5	37	24	0	1
Cd274	KY014505	GGTCCAGCTCCCGTTCTACA	3583	1484	1119	380	2782	28	339	637	121	997	136	64	54	52	46	15	5	125	90	58	21	75	886	120	260	64	8	6	22	19	10	7	13	80	176	2	20	832	27	56	14	110	197	25	38	5	7
Cd274	KY014506	AGTACACCACTAACGCAAGC	1476	679	11	190	12	21	258	25	39	273	80	214	210	29	29	293	290	6	7	39	15	19	16	250	626	920	7	23	813	34	125	91	10	184	104	118	428	59	78	5	25	4	16	8	22	60	36
Cd274	KY014507	CTGGTTGATTTTGCGGTATG	3950	1341	223	40	110	4088	7580	19	500	240	133	27	1618	6058	22	34	49	324	70	59	47	98	20	16	171	30	23	2	180	5	49	10	5	5	74	25	45	104	9	370	16	18	34	8	12	13	8
Cd274	KY014508	TCTGGTTGATTTTGCGGTAT	5170	2876	2366	10078	6573	2464	1968	1622	3471	11618	5176	2619	18617	2383	2111	2974	13544	6144	5934	1854	1797	1123	4908	4567	7323	20768	1395	2319	61668	10902	316	3144	466	2419	1324	2634	2221	722	1159	133	2894	2472	1394	343	2908	3418	1568
Cd274	KY014509	CTCTGGTTGATTTTGCGGTA	2354	1102	69	5391	154	155	113	179	99	220	96	69	461	650	32	88	268	126	139	77	93	137	244	226	334	384	57	603	17740	658	15	132	51	2446	69	130	148	6476	104	265	62456	1722	65	106	13896	17426	574
Cd274	MGLibA_09090	GTATGGCAGCAACGTCACGA	3037	1085	135	253	13	2	362	784	2695	58	453	613	1595	124	57	277	36	44	71	10	36	61	91	193	573	42	4	11	3	4	7	14	1	6	11	7	2	9	17	13	0	58	9	11	10	22	6
Cd274	MGLibA_09091	CTGGATCCACGGAAATTCTC	2428	944	70	18	7	19	47	68	12	25	89	4	25	31	22	55	135	22	86	122	64	10	384	130	93	3482	5	330	2	3	7	0	27	3	7	10	2	3	2	0	4	5	0	11	4	0	8
Cd274	MGLibA_09092	TCCAAAGGACTTGTACGTGG	2687	1120	18	119	1600	679	73	35	125	18	62	30	226	276	182	7	31	58	27	40	185	95	129	228	100	77	5	3	20	6	5	3	3	2	13	2	16	8	5	31	11	4	8	15	15	4	5
Cd274	MGLibB_09090	GGACCGTGGACACTACAATG	2351	642	92	47	39	158	12	14	60	32	154	693	43	18	2	10	1	31	81	29	8	11	7	25	517	12	1	2	69	7	11	3	3	11	11	0	36	10	711	17	14	38	3	7	1	3	0
Cd274	MGLibB_09091	GGATGATCAGCTCCGCTGTG	3326	1098	11	36	117	67	12	10	11	2	481	33	19	28	5	15	32	23	9	57	17	28	1669	24	21	46	3	3	2	1	7	1	0	8	37	0	5	2	5	156	14	1	7	6	3	2	9
Cd274	MGLibB_09092	TTTAGTGAGAATGCTAGATG	1970	773	86	104	125	1659	2042	1663	208	126	839	778	140	194	405	2250	105	283	1127	657	23	145	89	3904	236	133	2	15	46	301	19	14	341	881	504	9	143	77	267	162	3035	132	257	22	81	60	150
Cd276	KY014510	CCAACAAGGACCTACGTCCA	3887	1530	34	14	66	21	91	440	299	90	90	43	184	1585	12	425	250	566	36	15	9	46	340	23	567	26	1345	39	135	8	15	0	11	1477	552	19	9	6	4	19	109	7	82	12	232	3	6
Cd276	KY014512	AGCTGCCCTCGTCGGTTACT	4948	1987	18516	37321	6490	78943	45509	130030	10479	91713	40298	27543	71952	40552	140378	103340	71077	25620	84772	83746	1101	87088	84169	48670	62445	12115	191572	181326	76912	97597	248019	249088	144452	71335	147380	193399	28187	92142	331824	232195	13440	174128	91970	42968	103905	344557	68205
Cd276	KY014513	TGGGGAAAAGGAGCAGCGTA	1069	474	3	1	29	155	29	2	3	1	36	4	6	37	3	6	1	1	440	2	8	2	3	0	1	24	4	0	0	0	249	2	6	25	404	7	0	0	0	2	4	35	3	5	234	5	1818
Cd276	MGLibA_09093	GCGCGTCCGAGTAACCGACG	2211	769	35	31	8	8	11	28	8	10	18	119	23	16	689	31	5	28	12	13	23	11	26	13	10	10	2	1	17	4	0	1	0	26	5	3	4	5	242	14	10	2	41	8	22	1	10
Cd276	MGLibA_09094	ATCGAACAAGCCCCGCTCGT	3164	538	3	98	110	952	10	20	60	29	56	207	1468	3	32	26	23	34	4	123	76	45	4	4	10	393	1	22	3	5	3	7	3	161	220	1	8	7	18	4	2	3	15	213	12	12	384
Cd276	MGLibA_09095	CCCAACAAGGACCTACGTCC	3891	1602	290	45	877	63	370	36	46	17	1178	61	39	120	8	27	396	46	355	115	143	22	54	77	729	61	78	4	242	88	4	4	9	83	217	6	27	10	15	22	20	11	54	34	17	1	38
Cd276	MGLibB_09093	TCGGACGCGCTGCAGCCTCA	6775	2509	22	46	186	112	362	36	116	156	78	224	1941	36	165	92	86	101	135	70	58	1377	779	393	346	1059	112	1	270	3	63	76	12	27	439	12	157	31	206	87	13	37	22	21	65	11	21
Cd276	MGLibB_09094	CCTTGTAGGTGCCGAGGACC	3914	1699	157	55	125	180	216	134	67	1514	70	281	271	13	80	326	67	12	56	34	25	91	297	83	25	82	7	11	1739	30	9	83	814	80	3	3	6	6	11	45	0	3169	43075	28	10	6	4
Cd276	MGLibB_09095	TTCTCCAGCACACGAAAGCC	3438	1053	205	785	1416	145	26	41	43	235	62	20	87	28	1646	565	4143	11	2572	44	119	36	959	119	60	34	4	6	77	20	0	76	3	5	11	10	107	100	244	18	54	6	13	19	111	4	15
Cd28	KY014515	ATGCCGAGTTCAACTGCGAC	2804	874	113	7	8	42	11	5	6	45	34	50	39	66	18	47	87	18	1896	7	50	3	170	33	25	53	7	2	4	12	25	7	33	41	8	6	6	2	5	48	2	3	3	12	1016	8	30
Cd28	KY014516	AAACAGTGACGTTCCGTCTC	2705	688	5	165	49	38	105	1	10	2	4	14	25	35	19	10	17	9	324	12	10	14	173	37	133	32	6	3	131	4	2	5	34	0	0	2	1	2	20	0	0	3	5	10	4	0	1
Cd28	KY014517	GCTGTTCACGCCCTTGTACA	3594	1007	5	47	143	548	91	23	286	144	407	31	61	25	58	3929	12	2933	28	19	121	39	86	315	13	17	339	1	11	9	89	8	1	123	13	2	7	6	4	19	1	3	10	974	11	103	6
Cd28	KY014518	CTCGGCATTCGAGCGAAACT	1652	637	8	1292	18	0	6	51	6	24	18	38	22	10	6	10	130	234	10	26	2906	689	22	6	58	35	1	5	1	0	0	6	4	1	5	20	0	5	5	3	2	2	29	10	5	81	21
Cd28	KY014519	ATCCCCGTCGCAGTTGAACT	4398	1587	382	2163	16630	2004	3261	991	620	8265	6780	786	6879	1711	1121	5174	3004	415	1812	6460	1789	3569	3751	1175	1504	586	307	23	70	2585	382	511	644	552	986	102	119	98	646	229	127	60	127	133	345	101	124
Cd28	MGLibA_09099	CGCCTTACCTAGACAACGAG	2358	740	23	25	8	13	56	97	66	2	4	133	24	179	48	69	68	141	704	40	15	177	43	11	12	18	18	193	297	48	353	21	789	11	47	0	4	895	1671	942	54	1184	109	143	2	36	27
Cd28	MGLibA_09100	CCCGGAATTCCTTTGCGAGA	2001	434	1	4	1	541	129	1	6	1	3	8	0	16	15	0	11	13	10	10	437	3	3	1	24	197	3	6	3	2	0	0	13	2	0	0	2	0	16	1	0	0	17	2	4	0	0
Cd28	MGLibA_09101	GCGGTACGCTGCAAAGTCTC	2326	777	130	41	1408	5400	56	505	28	33	24	75	614	1076	699	557	39340	7987	108	1099	48	61	13	9	66	63	7	0	99	18	15	6	1195	182	29	39	40	941	268	506	21	1464	28	3	129	1785	28
Cd28	MGLibB_09099	CTAGCAAGCCATAACAAAAC	870	537	789	22	120	55	112	29	74	475	171	5	158	42	108	420	4	1	1784	242	1	24	231	1800	14	117	4524	55	88	20	12	3878	28	11	1388	10	232	0	4	2	1041	6	22	60	0	16	20
Cd28	MGLibB_09100	CCCCCTAGACAAATAGTAGA	1110	425	1	0	8	1	19	21	17	63	16	9	170	38	61	0	3	205	2	1	14	9	2	0	0	5	5	0	12	11	47	1	0	1	3	1	1	0	2	0	0	23	11	1	3	0	4
Cd28	MGLibB_09101	CAGTGGCTCTTTGTGTTATC	3262	1034	11	1	303	11	61	1	11	31	140	10	4	32	22	513	21	16	7	19	4	12	1	30	11	183	1	5	5	59	0	8	1	1	0	2	1	5	5	5	4	19	8	7	4	2	5
Cd4	KY014612	TATCACGGCCTATAAGAGTG	3013	615	434	50	792	198	88	4419	49	123	40	48	69	10	2132	18	84	37	10	8	107	14	90	49	8	2733	2	11	1	2	585	3347	38	6	60	505	2	7	7	76	21	1	17	12	12	1526	30
Cd4	KY014613	CTGAACCCTTAGGTTGGACA	2262	914	23	15	3	161	234	3	22	9	13	6	91	46	36	50	8	38	8	5	14	1	9	6	131	10	2	22	9	8	37	0	3	13	23	3	23	7	0	0	2	2	7	51	5	59	7
Cd4	KY014614	CAGGCTGGTACCCGGACTGA	3363	940	6	428	5	9	3	0	4	8	1	13	16	12	40	8	8	30	40	14	6	5	758	548	10	6	1	1	11	2	44	19	3	21	659	1	5	0	5	1	61	3	2	1	27	0	0
Cd4	KY014615	GACCTTGGATAGCAACTCTA	1316	345	3	10	0	6	9	5	17	11	4	6	3	9	34	10	131	8	58	2	24	2	2	25	149	15	0	0	3	1	0	0	2	0	0	1	0	1	9	1	0	0	1	21	9	0	0
Cd4	MGLibA_09186	CAGCAAACTGAAGCGAGACC	2218	513	7	10	77	26	23	37	29	13	17	6	29	19	6	12	453	1	1	12	3	9	6	103	7	3	3	15	0	0	0	0	2	1	44	0	0	3	273	2	2	6	1	6	192	0	0
Cd4	MGLibA_09187	CTGGAACTGCACCGTGACCC	4666	1464	33	57	74	848	117	19	218	33	284	180	185	187	58	39	69	15	25	41	103	44	549	123	101	147	11	36	25	2	7	17	13	50	17	8	7	48	6	20	5	83	531	22	423	23	13
Cd4	MGLibA_09188	GACCTTAGAGTTGCTATCCA	2442	537	6	69	404	10	19	17	23	46	27	44	2	35	105	47	3	21	23	18	8	48	18	87	161	199	0	0	0	2	1	1	9	7	21	57	5	2	5	2	1	22	5	9	4	1	2
Cd4	MGLibB_09186	TCGCTTCAGTTTGCTGGTTC	4760	1621	32	457	141	178	168	206	233	63	103	2988	105	154	419	32	111	2863	109	35	528	31	20	67	1720	3062	36	18	22	40	178	8	975	2	23	26	52	13	9	10	478	37	36	90	134	26	7
Cd4	MGLibB_09187	TCAAAACGATCAAACTGCGA	1504	513	452	150	98	1657	32	191	317	48	30	41	15	236	207	1682	88	19	98	52	26	79	21	151	7	1864	2	6	3	11	6	77	4	35	77	7	204	11	1	117	0	6	15	14	7	0	5
Cd4	MGLibB_09188	TCAGACTTATATCTGTGAGC	2454	403	0	0	44	61	12	3	22	0	0	14	11	7	38	5	200	0	25	2	1	2	11	21	3	9	8	0	3	10	1	3	0	1	0	1	0	4	1	2	0	13	1	3	0	8	7
Cd40	KY014616	TCCGCTCAGATCAAGGGCTT	3490	1111	14	44	50	199	91	1139	39286	1405	15	37	25	41	68	57	78	54	1356	7	34	24	320	210	366	61	4	0	32	51	1011	11	23	3	27	140	2	3	3	9	4	2	2	12	12	1	656
Cd40	KY014617	TCAAGGGCTTCGGGTTAAGA	2097	446	1	2	1	31	1	0	13	2	1	0	8	0	0	3	4	4	6	9	10	3	3	2	0	2	0	0	1	0	81	0	0	1	0	0	0	0	0	0	0	0	2	4	1	0	1
Cd40	KY014618	CTGCACCAGCAAGGATTGCG	2225	827	38	1511	174	1240	34	47	16	3	75	190	14	397	111	7	2	11	9	7	20	258	6	15	2108	18	0	1	35	15	4	3145	366	36	11	135	48	2	3	21	4	4561	10	4	5	202	29
Cd40	MGLibA_09171	ACATGCCTCGCAATCCTTGC	6026	1942	47	1104	181	5530	183	163	2431	328	4262	135	4715	1318	364	633	515	325	6294	6577	264	285	3489	1743	1810	166	33	48	1132	804	105	56	19	118	257	822	708	70	1241	77	46	42	167	466	199	62	19
Cd40	MGLibA_09172	CCCCATAGCGCGCACAGCCG	3746	1211	172	45	92	154	408	89	204	4	52	80	38	320	97	36	53	21	1880	15	12	550	112	59	154	2496	52	6	51	404	2	6	3	84	39	516	110	25	2892	84	5	10840	29	29	4	174	14
Cd40	MGLibA_09173	ACGTAACACACTGCCCTAGA	3507	688	1	6	24	29	2	0	27	4	56	2	6	32	6	26	580	1	9	19	47	7	19	35	1	11	1	4	1	1	0	0	109	1	6	23	0	0	38	1	1	40	1	4	32	1	2
Cd40	MGLibB_09171	GACAAACAGTACCTCCACGA	1707	376	17	1	12	25	13	4	71	0	4	4	26	10	0	9	1	14	12	27	14	44	0	8	3	2	11	2	11	638	7	0	32	2	6	274	0	18	0	11	0	20	98	5	4	0	2
Cd40	MGLibB_09172	AGCGAATCTCCCTGTTCCAC	3615	1428	34	195	76	407	199	33	67	21	369	496	68	34	20	53	53	4	6	39	335	14	12	248	1767	17	2	1	9	173	3	8	314	78	6	1	31	18	1	2	1	17	17	11	6	7	19
Cd40	MGLibB_09173	GCAGTGTTGTCCTTCCTTAC	3428	1251	69	565	2299	106	32570	1113	2492	332	1224	1168	11726	430	6	2917	4379	41	367	431	7	66	37	318	92	502	7	8	33	50	21	32	475	103	108	115	11	156	79	23	85	1	28	30	11	16	4
Cd40lg	KY014620	TTCCTTATCACCCAAATGAT	3110	823	39	88	14	7	333	40	53	20	41	7	75	98	54	57	11	353	26	610	22	14	20	172	0	11	2	17	2	139	3	191	25	5	83	7	3	4	4	6	22	9	4	10	4	11	0
Cd40lg	KY014621	AAAGCACAGATCCAATCATT	1847	408	3	1	17	14	21	10	0	5	0	1	25	0	271	2	3	15	2	1	7	2	0	4	2	4	0	0	0	96	0	1	0	1	3	0	3	0	0	0	1	0	1	8	0	1	3
Cd40lg	KY014622	TATTTCAAAACAGGTCGAAG	1115	163	0	6	0	0	0	3	158	0	0	0	1	11	160	0	1	4	1	2	0	1	0	0	1	52	0	0	0	34	2	0	0	18	0	0	4	0	0	11	0	1	0	1	9	0	0
Cd40lg	MGLibA_09168	AGTCAACGCCCATTCATCGT	3980	2024	18	97	390	58	103	89	232	14	2587	90	66	863	12	186	1414	80	21	31	1730	111	60	174	293	203	116	6	12	3	226	8	29	12	266	79	73	9	65	1175	121	676	15	38	92	113	109
Cd40lg	MGLibA_09169	AGCCAGAGGCCGACGATGAA	1175	560	6	44	17	10	78	8	6	8	25	36	1	2	5	16	80	59	8	8	2	5	38	6	1	3	2	2	1	5	1	4	8	1	15	4	0	16	10	3	0	1	5	20	9	0	2
Cd40lg	MGLibA_09170	GCCAACAGTAATGCAGCATC	3182	1870	88	52	197	372	289	188	251	307	1632	178	517	408	739	755	1208	1984	438	1265	91	2218	185	947	312	594	158	21	14	22	57	9	18	55	231	63	64	27	162	25	0	18	365	208	12	33	38
Cd40lg	MGLibB_09168	ACCGGATGCTGCATTACTGT	5171	2136	183	1077	375	12722	5917	127	860	358	8910	315	225	237	85	532	127	144	466	279	3986	2350	159	2922	56	249	18	204	281	269	37	41	3341	28	70	2507	2997	55181	421	134	193	23	1013	29	29	161	142
Cd40lg	MGLibB_09169	GCAATTTGAAGACCTTGTCA	2803	950	5	44	40	33	712	87	220	12	22	27	7	5	3	16	32	524	412	117	11	19	20	129	33	3	0	0	46	2	4	5808	16	79	0	7	11	40	5	1	1	34	7	8	4	0	10
Cd40lg	MGLibB_09170	CATCTCCTCACAGTTCAGCA	4983	2185	77	667	83	306	1213	424	684	355	114	52	463	140	35	926	3905	802	381	133	283	648	1005	52	47	73	636	9	164	18	1567	54	95	194	216	322	101	1392	38	41	9	1530	25	435	10	163	207
Cd70	KY014688	CCTGCTCCCCAGCGCAGTGT	4789	1526	562	12659	37	157	796	176	132	906	308	201	2276	1056	178	76	592	1043	3442	5910	359	18	67	637	2297	180	120	240	879	76	73	356	33	2445	4043	51039	55	469	120997	3721	28387	10259	1363	8630	149	14859	44
Cd70	KY014689	GTGGGGTCCTTCCGAGGAAC	1330	556	8	29	5	43	11	16	30	83	0	24	15	541	24	48	16	26	160	3569	10	25	19	1	26	37	1	98	16	0	31	170	8	9	2449	2	159	1	7	20	912	929	112	25	11	14	21
Cd70	KY014690	CTTCACACACGGACCAGAGC	2478	799	7	30	471	11	22	3	1	0	19	96	98	28	7	10	93	3	12	25	10	3	191	32	1	113	19	5	8	113	1	0	4	9	4	4	0	16	70	506	33	1	248	2	3	0	44
Cd70	KY014691	GAAGGACCCCACACTGCGCT	2335	687	694	25	37	35	31	37	20	344	16	2377	214	16	230	97	1299	94	106	64	42	25	8	981	25	94	0	3	4	0	1	136	13	4	371	5	6	14	2	152	10	3	98	30	3	3	25
Cd70	KY014692	TCTGTCCCCAGTTCCTCGGA	6238	1868	9	52	56	33	72	11	88	21	64	527	160	101	17	25	7	25	357	24	85	10	48	1059	461	57	8824	93	53	6446	31	344	15	10	9	13	8	10	7	244	0	6	7	23	20	4	5
Cd70	MGLibA_09222	GGACCGCGTTCCAGCGCCAA	2390	672	8	10	605	9	4	12	11	13	8	11	5	356	5	1	65	68	3	6	10	0	9	104	7	92	4	34	0	0	2	3	0	6	0	0	5	1	155	3	9	39	0	7	2	0	10
Cd70	MGLibA_09223	GCGTTGCGGGACGGCAGCAG	2724	1025	51	48	4	30	412	42	215	144	4188	112	287	134	156	146	1694	4759	109	43	5427	146	841	137	179	81	10	6	9	21	13	9	4	2	15	25	4912	18	22	5	4	1	24	4	17	6	89
Cd70	MGLibA_09224	CAAGCTGATGCCGTGCGCAG	3469	1147	21	11	93	259	283	298	141	112	393	50	18	208	300	51	88	162	11	35	1195	224	39	114	16	359	33	85	29	1160	2936	6	56	54	50	11	77	91	63	12	8	1	8	28	645	55	8694
Cd70	MGLibB_09222	GCCCTTGCCCCTGGGTTCGC	7203	2693	39	917	134	167	229	102	501	223	549	32	168	45	484	64	391	136	121	104	36	48	59	89	57	571	125	718	62	626	245	43	2094	56	154	946	34	14	1502	25	124	2688	94	97	70	8	28
Cd70	MGLibB_09223	AGCTGTAACTCAGCTGTGTG	2216	684	19	2	0	0	8	2	126	1	2	13	15	3	0	5	0	1	15	9	24	2	4	17	3	14	0	0	1	7	0	0	47	1	0	0	0	0	1	1	7	0	0	49	1	0	0
Cd70	MGLibB_09224	GAGTTACAGCTGAATCTCAC	2009	410	16	357	190	122	13	16	3	3	271	43	120	100	11	121	28	429	6	3	122	5	142	42	615	15	7	8	48	2	54	69	34	6	35	6	17	6	10	4	22	7	22	121	30	2	10
Cd74	KY014698	TGTCTAGGCGGCCCTGTTGC	10405	2447	231	2313	2139	1669	572	2339	2371	1453	3138	903	1552	172	5636	793	1170	604	235	4555	720	13602	7520	767	2339	1225	502	1812	796	82	238	8942	215	344	896	39	416	2582	3802	352	2814	4269	3843	7322	1296	342	945
Cd74	KY014700	ACCTGTGAGCCAGATGCGGA	1607	406	20	12	51	66	41	23	173	31	22	24	273	48	633	31	8	6	15	2	15	5	2	1	6	12	5	1	2	3	1	1	0	5	5	9	2	0	2	2	0	4	3	249	10	0	2
Cd74	KY014702	GACATTGGACGCATCAGCAA	2428	938	7	10	13	54	76	20	9	56	60	64	18	398	7	30	47	14	20	19	28	12	24	30	184	151	0	1	122	2	27	4	93	91	7	15	0	6	18	304	11	2	94	1	6	2	8
Cd74	MGLibA_09228	GCTGATGCGTCCAATGTCCA	4107	1081	6	342	3	28	126	19	167	9	13	9	28	188	361	17	118	87	68	430	43	665	20	74	619	333	9	3	16	0	38	2	76	14	8	2	142	6	11	2	0	18	185	13	2	2	5
Cd74	MGLibA_09229	ATTTCGGAAGCTTCATGCGA	2152	461	3	10	0	9	206	7	0	94	54	18	4	0	1	103	2	0	9	1	2	5	26	10	32	221	0	0	0	0	0	0	0	0	0	1	1	23	0	14	6	1	0	1	2	0	2
Cd74	MGLibA_09230	GAGGTCGCGTTGGTCATCCA	4183	1146	35	465	258	118	1724	36	82	173	211	52	285	284	53	423	420	40	16	122	44	215	183	293	634	1209	15	38	1107	39	21	150	8	215	116	75	503	85	56	10	37	43	21	16	47	76	53
Cd74	MGLibB_09228	AGGGAGTAGCCATCCGCATC	2605	974	9	58	477	35	67	34	127	24	30	49	20	22	25	27	52	17	28	75	22	22	85	151	97	101	13	5	14	2	17	3	4	13	18	1	7	8	12	2	2	16	9	14	8	11	14
Cd74	MGLibB_09229	CTGGGTCATGTTGCCGTACT	6750	2045	20013	40262	9265	81938	49189	136441	10853	93884	41391	31611	75276	42684	147759	109490	75906	27797	87546	88549	1613	89702	89463	52892	63548	12789	208940	197839	81933	202728	267094	255791	155059	75773	152859	202838	29434	99596	342621	283761	14001	183031	93919	43759	106482	354269	70632
Cd74	MGLibB_09230	ACCGCCCTAGAGAGCCAGAA	1943	686	6	42	37	409	280	937	70	89	9	41	51	151	51	19	17	603	106	38	13	17	1136	65	7	65	70	0	27	8	7	3	6	2	23	5	12	26	253	3	5	2	13	64	1	4	4
Cd80	KY014713	GGCCTGGTCCTTTCAGACCG	2605	542	6	22	2	12	21	1	34	11	230	10	6	13	3	5	2	0	6	2	5	11	5	13	536	8	0	0	0	1	2	0	7	1	4	0	3	5	1	0	3	2	0	7	2	0	2
Cd80	KY014714	CTTCATGAGGAGAGTTGTAA	1298	251	25	54	0	1	4	9	0	3	27	0	6	21	6	4	28	37	9	4	1	15	242	16	10	3	2	1	1	1	0	2	0	2	1	0	0	14	0	0	0	0	52	0	1	4	1
Cd80	KY014715	TCCCAAAGCCTCGCTTCTCT	8876	3591	106	718	651	585	108	808	737	39	293	195	53	266	105	734	58	222	289	192	158	38	235	132	99	666	14	182	188	121	21	76	6	32	282	26	50	12	13	27	21	14	22	731	43	8	9
Cd80	KY014716	TTTCCAGACTCAGTTATGTT	4536	1807	732	318	146	112	783	141	32	2439	285	123	262	420	525	90	2748	73	485	175	2789	1225	587	599	75	351	44	3	22	400	7	74	35	51	84	18	18	22	26	17	265	747	71	14	13	102	13
Cd80	KY014717	AACCAAGAGAAGCGAGGCTT	1051	586	68	53	99	197	175	650	29	19	499	73	381	297	117	181	37	138	9	32	21	46	169	60	23	44	10	3	5	31	4	238	19	7	23	0	51	2	4	4	7	7	4	12	12	4	66
Cd80	MGLibA_09240	GAGTCGTATTGAAATCTAGT	975	158	1	12	0	14	18	0	0	0	3	7	3	4	1	0	3	18	1	0	3	0	10	0	0	59	0	0	0	1	0	4	0	0	0	71	6	2	0	2	0	1	0	0	5	0	0
Cd80	MGLibA_09241	AGTCTGAAGACCGAATCTAC	2037	648	13	70	25	23	33	30	15	7	292	3	59	0	29	12	38	10	10	7	86	17	559	0	22	9	0	9	3	0	6	11	5	2	1	0	7	6	0	0	0	4	11	1	20	1	1
Cd80	MGLibA_09242	CATCAATACGACAATTTCCC	3440	1337	48	101	2085	409	14	83	608	12	21	149	261	183	35	230	165	157	39	28	180	99	121	19	81	107	42	1	44	4	8	247	5	8	25	4	35	17	42	158	51	9	1027	19	15	14	112
Cd80	MGLibB_09240	TGTGGCCCGAGTATAAGAAC	1557	366	1	37	1	2	13	5	99	10	6	71	1140	9	4	305	5210	0	7	28	2503	33	4614	646	2	3	3	71	0	19	1214	3	13	932	358	1	3423	168	1	5	40	11999	4948	37	2	2	9
Cd80	MGLibB_09241	TGTTCAGCTAATGCTTCTTC	7644	3328	2977	5693	15774	9315	4033	6018	6584	9274	4188	2390	2593	4375	4034	1680	1579	1716	19553	5647	20548	3870	3416	3414	7493	3206	7348	276	1445	956	3409	5164	2072	1177	4978	2339	8343	9751	362	6471	26321	597	2451	15110	3079	492	2427
Cd80	MGLibB_09242	ACAAGTGTGTTCTTGCTATC	4039	1322	41	110	151	336	519	158	7913	205	128	42	48	54	25	491	35	36	1689	218	133	22	75	312	307	129	55	115	27	190	208	523	76	159	19	14	31	2941	65	46	32	710	1130	29	22	834	14
Cd86	KY014734	ACTAATTCAACTAATGAGTA	1382	388	0	8	2	0	2	1	0	0	6	0	2	1	2	9	1399	12	0	3	3	1	4	1	1	3	0	0	0	0	0	1	2	1	3	3	0	1	0	4	0	0	2	182	6	0	34
Cd86	KY014736	TGGAGGATAATTGATCCTGT	3302	1022	7	111	42	8	3	27	151	7	18	3	39	39	3	23	39	528	11	987	24	40	9	37	4	201	45	9	20	0	1	5	7	30	0	1	0	0	0	5	1	12	6	11	4	17	7
Cd86	KY014737	CGTACAGAACCAACTTTTGC	2352	364	24	10	59	25	874	2	7	24	8	3	48	16	10	5	1	1	3	30	1	3	433	53	2	25	147	5	2	3	0	0	1	130	43	7	0	5	0	2	619	1	0	188	1	0	1
Cd86	KY014738	TCTGCCGTGCCCATTTACAA	4877	2581	1466	850	3879	266	6283	2271	825	23314	4971	4479	969	7437	432	286	302	368	1121	6021	1721	902	314	830	1317	224	39	51	6000	5684	454	29902	316	7444	108	899	6618	376	32	305	511	121	67	391	92	2885	63
Cd86	MGLibA_09255	GTGACCTTGCTTAGACGTGC	3629	1042	115	182	75	1001	7	896	39	14	15	22	615	75	70	171	92	178	32	33	49	105	36	12	31	9	26	4	3	0	19	3	7	15	18	16	13	79	1	2	3	8	19	11	2	0	25
Cd86	MGLibA_09256	TTGACCTGCACGTCTAAGCA	4179	1177	19	43	412	13686	593	23	338	29	41	78	121	110	70	18	2393	826	43	170	10	22	27	116	89	28	19	3	8	14	9	83	7	14	15	13	9	12	20	9	10	13	1664	91	19	16	44
Cd86	MGLibA_09257	TTCCATCTCCTCAAACGTAT	2544	1080	29	40	4	93	20	16	57	5	249	17	70	10	380	47	39	3	151	32	5	11	17	64	3	95	0	5	27	5	5	6	2	1	15	6	1	21	389	24	56	1	22	20	14	1	7
Cd86	MGLibB_09255	CGAGCTTTGACAGGAACAAC	2039	592	0	29	0	32	29	72	11	3	108	66	713	15	8	10	158	10	3	4	85	2	19	70	12	4	0	4	0	9	2	3	2	3	105	0	0	1	15	0	1	503	0	2	184	0	0
Cd86	MGLibB_09256	GAAATAAGCTTGCGTCTCCA	1981	586	2	15	24	21	1362	8	3	137	1	4	168	6	300	30	30	6	17	17	7	11	62	5	8	35	1	3	1	0	1	5	0	7	31	0	1	98	0	75	0	521	71	7	10	2	90
Cd86	MGLibB_09257	ATCTCCTTCCAATACGTTTG	4397	1552	88	13000	53	49	1344	1132	72	60	92	19	188	1706	38	128	96	89	29	35	51	146	1039	116	186	234	103	1044	6	49	7	260	219	230	19	4	5	45	33	469	66	710	800	75	16	37	160
Cd8a	KY014739	GTGTTGGGGTCCGTTTCGCA	3228	1083	37	80	350	32	422	10	76	221	248	38	26	46	485	177	70	23	333	118	66	531	145	49	28	113	2	6	7	4	13	20	2	39	8	11	394	1846	312	59	253	17	1	4	101	0	0
Cd8a	KY014741	ATCCCACAACAAGATAACGT	1352	191	0	0	2	1	1	0	0	0	1	0	195	0	1	10	275	77	0	0	5	1	0	0	0	1	0	0	0	0	4	13	1	1	0	0	104	6	0	2	0	1	0	0	12	0	1
Cd8a	KY014742	CCAAGAGCATCCTTGCGAAA	1743	757	11	28	111	9	171	3	115	14	41	21	75	89	26	96	11	15	20	8	14	9	15	33	28	29	2	1	3	10	6	3	7	9	8	56	15	2	290	16	2	39	8	4	17	0	12
Cd8a	KY014743	TGAAGCCATATAGACAACGA	1950	859	152	129	25	56	457	37	13	56	35	352	34	84	38	367	589	14	89	17	5	31	8	6	470	15	2	28	21	0	1	1	576	59	3	9	10	5152	2	728	3	2175	0	15	96	2	67
Cd8a	MGLibA_09258	CGTCCCACGTTATCTTGTTG	8354	4209	8214	14054	223	698	295	208	382	869	1057	2896	2369	1502	141	3595	1012	1366	3767	5932	366	93	226	1356	151	2769	189	1075	1220	235	95	484	87	3145	4157	49590	553	751	117004	7034	27362	10721	4379	7888	287	14529	100
Cd8a	MGLibA_09259	GCCCACCTTCGTTGTCTATA	4829	1602	145	187	1519	178	159	1810	330	642	109	702	631	446	46	984	3599	100	192	1444	207	481	353	10300	111	188	8	60	245	272	196	173	198	15	1605	78	89	370	82	234	464	32	624	664	15	258	32
Cd8a	MGLibA_09260	ACCCTTGGCCGGAATCTGCG	3392	807	3	19	5	52	11	11	20	31	10	14	2	10	5	5	248	14	0	11	58	4	31	4	45	29	28	4	14	7	10	15	2	5	2	2	8	8389	1	7	0	1	13	5	3	1	7
Cd8a	MGLibB_09258	CAGAAGGGCCACGCAGATTC	2336	695	23	145	13	11	9	8	53	0	23	4	15	7	29	40	66	33	7	5	5	15	74	101	5	14	4	0	0	8	3	1	0	0	3	1	14	0	18	0	2	0	38	7	1	1	0
Cd8a	MGLibB_09259	GGGAGTTCGCAGCACTGGCT	1651	396	1270	200	37	17	333	20	1503	148	97	1965	110	21	201	144	2	163	38	33	325	54	42	860	17	858	7	14	553	107	1647	3	14	1656	21	61	39	12	8	2348	88	16	25	23	679	6	26
Cd8a	MGLibB_09260	GAGCACCTAACCTGAGCCAC	2432	840	13	46	7	13	7	5	235	0	227	36	4	9	234	27	11	20	7	10	40	8	21	3	22	71	1	6	1	4	0	5	35	58	33	6	13	2	3	6	0	0	4	3	14	0	6
Cdc5l	KY014917	GCTCCGAGTACCTGAGGCGC	2150	35	0	26	1	0	0	0	0	1	0	1	0	0	0	0	3	0	0	6	0	0	0	60	1	0	0	0	1	4	0	0	1	0	0	0	0	0	0	1	0	0	0	1	0	0	0
Cdc5l	KY014918	CCGGCCTGACCCGATAGACA	2998	254	0	0	0	0	7	3	0	0	1	0	0	1	6	0	3	4	0	1	1	3	1	24	8	12	0	4	1	0	0	3	0	2	2	0	0	0	0	0	1	1	0	0	0	0	1
Cdc5l	KY014919	TCTTCCTATGATCGGAGCAA	2810	134	0	0	0	0	0	0	0	0	1	0	0	2	1	1	2	2	3	1	0	1	0	1	0	1	0	0	1	0	2	0	0	0	0	1	0	0	0	0	0	0	0	1	0	1	0
Cdc5l	KY014920	AGGACCATTGCTCCGATCAT	2697	169	0	96	1	45	1	3	44	0	2	2	153	2	0	8	5	3	9	0	4	4	16	0	2	3170	3	0	6	0	0	0	7	17	169	0	4	0	30	0	0	0	0	51	1	0	2
Cdc5l	KY014921	TTGCCTTTAATAGGTACGAA	1188	204	0	0	0	0	1	2	9	0	0	2	0	24	2	0	2	4	0	0	1	0	1	0	5	0	3	0	6	2	5	0	0	1	0	0	0	0	0	0	0	0	0	1	5	0	0
Cdc5l	MGLibA_09372	CTTTAATAGGTACGAATGGC	1694	181	0	0	7	0	0	9	0	1	0	0	3	0	0	0	0	0	0	1	36	0	0	0	34	0	0	0	0	0	0	2	0	0	0	0	0	0	0	1	1	0	0	1	1	0	10
Cdc5l	MGLibA_09373	CAAGGGACAAAACTGCCCAA	865	144	13	3	183	42	53	12	2	2	24	837	122	9	92	1	6	1	15	3	0	6	0	0	4	6	0	0	16	0	0	3	0	0	1	1	11	6345	0	0	1	0	3	0	0	64	1
Cdc5l	MGLibA_09374	ACTCATAGTGTTCCAAGCAC	2342	84	0	1	19	0	0	1	14	0	1	1	1	0	0	0	1	0	0	0	0	2	1	0	0	3	0	0	0	0	0	0	0	0	0	0	0	0	0	0	0	0	3	1	1	0	0
Cdc5l	MGLibB_09372	TCACCCTCATCCATGTCTAT	5872	1272	163	338	290	57	98	129	36	49	83	121	152	118	1105	341	34	193	17	96	177	17	31	265	44	115	1	1	55	49	25	4	59	9	11	15	108	36	3	12	0	1058	27	472	8	3	6
Cdc5l	MGLibB_09373	TGAACTTGAGATGCTCTCCG	3524	35	0	0	0	0	0	0	0	0	0	0	0	0	0	0	0	0	0	0	1	1	0	1	0	0	0	0	0	0	0	0	0	0	0	0	0	0	0	0	0	0	0	0	0	3	0
Cdc5l	MGLibB_09374	GGATGAAATTCTGAAAGCAG	757	13	0	1	0	0	0	0	0	0	0	0	0	0	0	0	0	1	0	0	0	0	0	0	0	0	0	0	0	0	0	0	0	0	0	0	0	0	0	0	0	0	0	0	0	0	0
Cdc73	KY014933	TCCAAGTAGATCTTTTCGGT	2170	230	0	21	0	0	18	1	7	1	88	6	0	76	1	62	0	0	1	80	15	0	3	40	0	4	0	0	0	72	0	0	0	35	2	0	0	0	1	0	2	1	1	1	4	0	1
Cdc73	KY014934	CCAAGTAGATCTTTTCGGTC	2054	276	0	2	17	34	0	16	25	6	2	4	1	2	42	0	3	15	2	21	12	2	3	2	0	4	0	0	4	1	0	0	0	37	0	0	5	1	11	1	154	1	0	4	0	0	2
Cdc73	KY014935	GCTGCACGCCGGACATAAAC	373	56	0	0	0	1	1	0	0	0	0	2	0	1	0	0	35	2	0	0	0	0	1	1	0	0	0	0	0	0	2	0	2	1	0	0	3	0	0	0	0	1	0	0	1	0	0
Cdc73	MGLibA_09378	CCCGACCGAAAAGATCTACT	1565	296	11	76	0	11	37	3	11	5	16	5	54	6	7	102	55	4	5	7	14	4	2	66	154	285	0	5	279	10	1	31	1	56	49	5	109	92	28	3	6	1	5	5	17	23	13
Cdc73	MGLibA_09379	AGTTCTATTACCTCAATCCG	2422	123	0	1	2	3	0	0	0	0	0	5	0	0	8	2	2	1	5	0	0	2	0	3	2	23	0	0	0	0	0	7	3	0	2	0	1	2	0	1	0	6	0	0	2	3	0
Cdc73	MGLibA_09380	TTCTACTTACAGCTGCACGC	6829	320	0	1	14	36	0	6	7	4	65	0	3	20	4	2	36	26	2	3	5	9	41	3	0	8	0	0	27	0	0	0	0	7	2	1	3	108	6	0	64	1	2	3	2	2	16
Cdc73	MGLibB_09378	GCGAAAGGTGCACATTATTA	1970	353	1	86	203	6	422	4	17	10	10	10	323	8	97	13	4	62	6	8	11	21	349	22	45	50	159	866	11	5	2917	13	18	9	5	2	7	3	350	45	2	63	8	2	20	113	22
Cdc73	MGLibB_09379	CCGCTGAAGACCTATTTCCA	2011	163	0	0	85	2	0	11	0	0	41	3	30	0	1	0	0	0	0	2	0	1	0	0	4	0	0	0	0	0	0	1	0	3	2	0	0	0	0	0	0	0	0	0	0	0	0
Cdc73	MGLibB_09380	CAACATCAGCAAGCATAGAC	1476	570	3	115	17	57	132	42	3	15	53	39	37	159	460	12	140	146	74	80	166	563	162	46	164	30	1	0	0	2	2	7	0	17	1	0	0	0	1	9	1	6	5	4	5	18	2
Cdk9	KY015234	GGTTGGTGTATCGGTTGGGC	2770	273	1	0	0	110	62	2	5	0	4	32	48	4	3	334	0	0	4	5	2	2	0	1	1	3	0	1	0	0	0	1	0	4	4	0	1	0	2	1	0	0	7	6	2	2	0
Cdk9	KY015235	CTGCCCTTGCAGCGGTTATA	36	6	0	0	0	0	0	0	0	0	0	0	0	0	0	0	0	0	0	1	1	0	0	0	1	0	0	0	0	0	0	0	0	0	0	0	0	0	0	0	0	0	0	0	0	0	0
Cdk9	KY015236	CTTGCAGCGGTTATACGGTG	684	11	0	0	0	0	0	52	0	0	0	0	0	0	0	0	0	0	0	0	0	0	0	0	0	1	0	0	0	0	0	0	0	0	0	0	3	0	0	0	0	0	0	0	0	0	0
Cdk9	KY015238	ATTGAGATTTGTCGGACCAA	1478	180	13	0	181	0	5	0	0	0	107	0	5	20	0	29	1	3	0	1	2	3	2	1	1	238	0	0	15	1	0	0	0	0	1	10	4	1	4	1	1830	2	3	1	1	2	0
Cdk9	MGLibA_09573	GACATTGTGGTACCGGCCTC	3411	908	11	17	36	25	4	61	19	2	35	13	17	17	90	13	6	204	3	16	9	3	8	13	9	3	44	7	17	19	0	0	4	2	5	0	1	2	7	3	0	2	43	2	6	16	11
Cdk9	MGLibA_09574	CTCACCGTATAACCGCTGCA	4675	298	1193	0	5	4	144	10	0	0	4	0	18	4	125	28	3	9	3	46	18	5	92	5	1060	3	1	18	3	16	0	0	0	76	3	5	0	2	0	0	10	0	12	51	1	2	1
Cdk9	MGLibA_09575	TGGGCTGGCTATTCTTAGCT	1293	30	0	0	0	0	0	0	0	0	0	0	0	0	0	0	1	0	0	0	0	0	0	0	0	0	0	0	0	0	0	0	0	0	0	0	0	0	0	0	0	0	0	0	0	1	0
Cdk9	MGLibB_09573	CTTTCTTCAGAGCCACCTTC	5039	519	44	84	11	15	15	37	42	409	42	14	408	81	30	7	258	11	302	15	2	30	15	18	82	1	2	13	11	0	55	10	3	4	8	51	10	2	20	3	3	2	86	99	53	2	7
Cdk9	MGLibB_09574	TGGTCCGACAAATCTCAATT	2828	311	1	5	10	0	2	0	1	42	1	56	1	0	22	5	0	2	1	5	1	2	9	17	3889	0	0	14	6	8	0	0	0	6	0	2	2	1130	2	0	0	261	40	6220	1557	1	1
Cdk9	MGLibB_09575	AGTTCCCCATCACAGCCTTG	2825	180	1	32	16	10	82	2	61	4	3	2	52	0	10	10	5	12	3	2	14	6	2	28	4767	4	0	0	0	0	9	0	0	0	1	0	0	1	2	0	0	0	0	0	1	0	0
Cdyl	KY015382	GGTGCGGAGCGAGCCAGGAT	998	569	4	19	20	20	21	12	2	18	89	1	30	3	6	25	10	7	3	22	2	6	15	7	53	50	3	0	6	2	3	1	2	2	86	1	10	0	2	0	0	0	12	7	2	0	4
Cdyl	KY015383	TTTGCCTCTCGTTGTGGCGC	8979	2835	67	265	267	216	148	129	88	10	144	107	127	59	55	305	109	278	467	76	389	22	310	326	284	130	15	21	16	4	9	10	5	26	45	2	4	15	22	9	48	68	9	12	14	229	6
Cdyl	KY015384	AATCTGCTTCCGGGCGTTGC	3083	460	16	80	21	100	7	3	38	15	535	5	33	0	20	20	92	6	70	63	17	5	161	40	2	5	5	1	143	0	148	7	2	0	4	0	10	0	0	0	0	0	1	54	2	1	9
Cdyl	KY015385	CCGAGGTCCTGCCCTTAACG	5759	1344	52	276	951	417	205	94	306	23841	154	880	867	178	291	277	823	93	180	874	733	210	945	422	2385	380	153	12	149	15087	182	334	12	30	11	8	18	234	17	28	111	11	6	33	6	119	9
Cdyl	KY015386	TCCTGGCTCGCTCCGCACCA	8243	2365	37	174	304	254	314	203	560	86	128	8	34	715	4993	86	611	2651	45	209	105	80	249	908	59	59	9	58	195	31	8	1423	21	123	87	5	3	62	237	30	78	206	159	228	31	49	109
Cdyl	MGLibA_09675	CGTGCCTAAGAGCCCCGTTA	3338	662	16	174	380	46	17	78	120	7	177	91	172	191	11	85	13	199	110	7	142	74	10	19	25	65	35	8	1	1	0	3	45	3	0	7	5	2	9	224	616	39	179	14	3	3	0
Cdyl	MGLibA_09676	AAACGCAACCGCTTGTCAAA	1451	218	11	8	2	63	9	0	154	3	184	44	5	0	2	2	0	0	13	5	2	0	2	10	0	8	0	2	1	0	5	0	0	0	0	0	3	0	21	0	0	1	5	2	1	0	0
Cdyl	MGLibA_09677	CAGAACCAGCTTGCTGTCGT	2976	1045	54	342	567	1613	392	288	277	937	232	135	57	183	1160	695	352	2675	568	1814	1391	237	980	141	328	624	20	25	15	69	25	50	12294	132	10	24	342	2339	64	126	409	77	57	22	8	11	15
Cdyl	MGLibB_09675	TCCTCGGCACCCTGATCCAC	6265	1947	39	52	90	1377	686	1209	4977	171	74	22	1223	1985	826	700	124	154	69	113	2674	151	192	26	1040	688	127	0	25	207	4	24	77	250	28	194	124	9	19	29	38	430	255	196	25	26	16
Cdyl	MGLibB_09676	TGCAGCCGACGACAGCAAGC	2382	607	17	7	0	6	10	10	9	532	37	15	269	10	1	3	78	1	4	8	23	39	1	2	121	77	6	0	0	6	4	1	3	1	11	2	0	1	6	9	1	2	12	5	3	5	14
Cdyl	MGLibB_09677	AGATGCTCCTCCCATAATCT	2808	686	42	0	1	9	25	12	8	19	12	7	29	134	2613	26	52	114	75	8	7	43	63	676	192	379	4	5	628	3	40	1	8	4	0	0	100	11	5	27	1	1	7	4	2	2	7
Cdyl2	KY015387	GTGGGTCCCGTCGCAGTCAC	3531	1089	9	62	583	13	9	174	16	22	26	54	393	11	15	14	50	46	189	61	40	8	11	80	4	17	6	8	3	1	23	916	1	48	11	2	5	9	4	22	4	33	1369	13	5	2	5
Cdyl2	KY015388	GTTGACGCGCTTCCGCTTGT	6066	1653	22	26	74	142	90	31	43	69	490	21	941	52	43	113	406	1014	52	106	28	134	108	464	735	148	3	2	9	38	84	8	24	15	18	8	5	7	8	15	427	6	26	12	169	4	171
Cdyl2	KY015389	CGGGACCCACTCCGCGCTGG	2821	702	1	8	24	7	68	331	32	10	2	1	4	1	0	242	0	12	7	8	12	12	77	3	9	73	12	0	2	0	4	0	111	2	94	7	0	0	0	1	0	52	0	3	1	0	1
Cdyl2	MGLibA_09672	AGTTTATCGACGAGTTCAAC	1728	221	1	1	0	4	1	53	2	162	9	3	12	1	3	1151	6	4	1	3	12	73	123	6	659	2	0	0	0	20	0	1	0	0	0	1	7	9	1	0	535	5	1	5	11	1	1
Cdyl2	MGLibA_09673	CGGGTCCCATCAGCCGGATC	3512	997	152	154	5	47	142	85	121	149	207	100	1444	664	56	193	80	69	127	920	85	159	113	59	724	142	11	1	36	347	95	14	0	2	8	5	100	9	2	5	4	17	17	821	5	6	160
Cdyl2	MGLibA_09674	CGCTGGACAGCCGGCCGATC	3536	1313	177	485	853	1878	1309	237	1487	62	7936	478	580	3644	934	319	3134	1050	827	53	179	775	142	5131	428	401	27	84	78	285	23	1487	1353	82	1333	5	263	963	10	199	3268	241	47	75	42	3925	376
Cdyl2	MGLibB_09672	ACCATCCGACTCACGCCTGC	5016	1078	14	101	58	582	67	243	71	22	994	13	5	159	387	52	1435	513	20	36	25	5	62	179	544	21	9	49	13	40	12	1	30	89	9	1	1	4	2	7	14	1682	18	9	34	17	16
Cdyl2	MGLibB_09673	CTCGAATCGCAGAAGCTATC	2298	489	6	134	64	27	79	1	51	27	6	9	36	489	322	90	14	24	47	8	80	4	14	10	81	6	0	14	3	15	8	10	1	123	23	6	3	11	224	6	4	1	0	14	40	0	48
Cdyl2	MGLibB_09674	CCCATTAATGGCTACCACGA	3444	888	24	507	139	23	80	63	11	38	196	145	91	12	54	14	18	15	27	66	89	39	3502	12	1	17	6	9	23	5	1	1	1	4	162	6	25	11	913	11	1	1	20	2	6	2	1
Cecr2	KY015487	AGATATCATTAACTACCGTT	1911	219	1	0	0	4	0	6	4	0	0	2	0	0	3	3	0	66	3	7	2	3	154	93	24	9	0	0	0	0	1	0	24	0	3	0	0	0	0	0	0	0	3	15	2	0	4
Cecr2	KY015488	CATTTTCTGTAGGATCCCGA	3187	444	6	3	26	6	92	38	5	1	53	115	43	3	82	53	18	33	39	9	23	172	1132	9	67	45	3	14	1	5	3	13	3	318	0	2	174	1	5	3	1	1	2	3	0	4	4
Cecr2	KY015489	TCATTATAGATCGAGCTAAG	1941	510	38	13	46	97	121	5248	547	34	83	53	1660	191	22	104	6	6933	241	82	280	339	27	12	18	8501	1481	14	28	832	15	27	97	64	286	186	10	2	33	11	26	148	122	6	311	1	2
Cecr2	KY015490	CCTCAGGGGACGATCAGAGT	2291	461	1	0	4	6	0	120	0	1	10	1	11	2	0	15	1	96	0	12	5	8	7	5	1	1	8	0	2	0	16	1	1	0	1	0	0	0	7	0	0	1	0	3	58	1	0
Cecr2	KY015491	GAGGCAGCTCGGCGTGCCGG	2891	855	35	118	29	68	30	1	21	10	77	1022	41	46	40	118	228	2	6	16	196	13	24	22	1	1696	290	2	10	9	0	7	2	13	5	22	59	15	7	8	34	2	5	7	4	7	11
Cecr2	MGLibA_09741	ATCTCTACTCGAGTACGCAG	2461	425	24	95	8	2	12	60	2	26	44	0	4	449	10	26	4	4	64	43	24	29	6	515	17	327	4	5	38	26	0	0	100	1	14	1	7	2	63	2	99	9	7	3	6	729	7
Cecr2	MGLibA_09742	AAGATATCATTAACTACCGT	1261	132	11	0	0	0	0	0	0	1	0	1	1	3	0	1	0	0	1	1	2	2	0	3	0	6	0	0	170	2	0	1	0	0	0	0	13	0	29	0	0	1	0	0	0	1	0
Cecr2	MGLibA_09743	TCCAAAGCGAAAAAAGCTAC	427	69	0	0	0	0	0	0	0	0	0	0	0	0	0	0	0	0	0	0	0	0	1	1	0	0	0	0	0	0	0	0	0	0	1	0	0	0	0	0	0	0	0	1	0	0	0
Cecr2	MGLibB_09741	ACAATTCAGGTGCACTCTAC	2906	799	15	51	188	147	39	12	79	27	101	29	91	177	1192	153	26	12	45	5	7	114	30	28	50	126	50	11	75	29	6	26	1	29	12	2	39	2	2	20	10	15	36	8	31	17	4
Cecr2	MGLibB_09742	GCACAAGGAGAGTTCTCCAT	2714	623	240	98	77	6	100	189	764	305	7	255	196	145	49	111	37	28	341	15	98	27	114	34	672	103	9	9	326	13	9	1	907	38	1408	3	3	28	12	6	108	411	22	10	45	26	21
Cecr2	MGLibB_09743	AGCTCTTCACAGAGATGACG	847	121	0	1	0	5	850	3	1	98	15	1	0	41	132	0	1	0	138	3	0	2	0	1	0	0	0	0	6	1	57	0	1	2	1	1	1	2	11	2	28	5	2	3	0	2	2
Chaf1a	KY015956	TGTGGTCATTATCGACCTGA	4068	799	10	83	2	33	0	11	2	3	1184	5	268	9	1	133	1	12	6	41	3	10	11	10	2	78	0	0	10	0	66	10	1	2	1	3	13	1216	2	1	7	0	1	11	12	4	17
Chaf1a	KY015958	TTGGGAGCCTGCGGAGTCTT	2904	518	12	67	26	1113	27	33	24	34	133	7	26	278	1671	35	2	387	4414	13	96	3	91	23	5	5	62	0	3	8	5	225	22	16	15	13	4	17	3	4	1	155	9	4	2	5	0
Chaf1a	MGLibA_10113	GGAAGAGATACGACGAGCCA	608	38	2	0	19	0	0	2	0	0	1	532	0	0	0	0	3	0	0	8	0	0	2	0	0	0	0	0	0	0	110	0	1	0	0	2	6	0	0	0	0	0	1	0	0	0	0
Chaf1a	MGLibA_10114	GGAAAAACGCAAGGAGCGGC	594	34	2	0	0	0	0	0	3	0	0	0	0	0	0	0	0	0	0	0	0	0	0	0	0	0	0	0	0	0	0	0	0	0	1	0	0	0	12	0	0	0	0	0	0	0	0
Chaf1a	MGLibA_10115	ATAATGACCACACTCGGTAC	2072	413	6	4	0	0	5	2	4	0	25	2	0	0	1	10	70	1	5	3	4	1	3	5	0	17	0	0	5	0	0	1	1	2	0	0	0	3	3	0	0	0	0	0	1	0	0
Chaf1a	MGLibB_10112	TGCCCTCAAGAAGCTATCAA	1760	542	5	11	281	9	29	24	5	3	18	14	106	6	3	0	14	15	0	24	2	1	3	6	44	28	64	0	2	2	0	0	0	1	4	0	0	4	6	2	0	1	1	3	2	1	4
Chaf1a	MGLibB_10113	GTGGATTGCAAAGACAGACC	1019	321	0	85	9	188	4	5	14	1	18	0	3	0	14	12	7	8	6	3	4	4	5	0	0	4	1	0	0	1	0	2	0	0	0	0	6	0	21	2	0	1	0	0	2	0	0
Chaf1a	MGLibB_10114	CCAGTGAAGAGGTTAATACA	1666	694	30	294	111	260	465	413	1077	70	156	88	515	51	1809	66	366	63	14	341	60	129	87	698	245	180	9	2	36	20	16	9	12	21	29	31	28	32	32	63	2	7	80	6	10	12	4
Chaf1b	KY015959	CGGGGGTGGACACCGCCGTC	1678	545	55	25	25	120	13	12	32	19	37	18	8	988	207	5	9	6	3	2	130	15	16	2	10	0	3	1	55	8	2	0	5	0	2	5	33	0	18	0	7	3	13	4	50	0	6
Chaf1b	KY015960	GGGGGTGGACACCGCCGTCA	4	46	0	1	1	0	1	6	3	0	0	0	9	0	0	0	0	0	0	0	0	0	0	0	0	0	0	0	6	0	1	0	0	1	0	0	0	0	0	0	0	0	0	1	0	3	0
Chaf1b	KY015961	CTGTCCATTTACCCTGACGG	5962	208	0	0	19	6	0	3	13	3	158	1	1	1	0	0	3	0	10	1	2	0	18	3	0	5	0	2	0	0	6	0	2	1	0	1	0	0	0	0	0	0	0	1	2	0	0
Chaf1b	KY015962	TTTGGTGTGTCGAGCAAGAT	2062	343	47	31	50	13	8	121	1	3	7	1	8	1	10	143	2	14	5	2	6	88	8	90	0	0	11	0	2	2	0	0	1	0	0	0	26	8	54	1	0	2	0	3	62	1	1
Chaf1b	KY015963	TGCTGTCGTCGTGAAACATC	3334	833	2	37	1	32	12	258	25	8	18	4	19	34	348	45	16	22	26	3	13	136	17	141	10	8	2	1	14	3	1	5	19	0	0	7	4	4	0	18	3	3	106	5	1	0	1
Chaf1b	MGLibA_10116	ATCATATGGGATGTCAGTAA	1750	95	1	1	2	19	0	0	0	2	0	4	0	0	3	2	0	2	0	0	2	1	8	4	25	0	3	0	0	0	0	2	0	5	6	23	0	0	2	0	0	2	0	3	1	1	2
Chaf1b	MGLibA_10117	GTCGCAATATATTGACCCAA	1252	73	2	0	0	0	0	0	0	0	3	0	0	0	0	0	1	0	0	2	0	1	0	0	0	1	0	33	17	0	0	0	0	0	0	2	0	0	0	0	0	0	1	4	2	0	1
Chaf1b	MGLibA_10118	GCGTACAACATTGACAGCTT	1506	24	3	0	0	0	1	0	0	0	1	0	0	0	0	0	1	0	0	0	0	0	0	0	0	0	0	0	0	0	0	0	0	0	0	0	0	0	0	0	0	0	0	0	0	0	0
Chaf1b	MGLibB_10115	GATGCTAAAATCTCCCCAGT	1094	48	0	1	0	2	0	0	0	0	0	0	1	0	0	3	0	0	0	0	0	2	1	4	1	0	0	0	0	0	0	0	0	1	0	0	0	0	0	0	0	0	1	0	0	1	0
Chaf1b	MGLibB_10116	CGCAGCTGAATAAGGAGAAC	1098	37	0	1	16	0	0	0	0	0	1	0	0	0	0	0	0	0	0	0	0	0	0	2	0	0	0	0	0	0	0	0	0	0	0	0	0	0	0	0	0	0	0	0	0	0	0
Chaf1b	MGLibB_10117	CAGATGCCGTCATTCTGTTG	5220	419	1116	703	368	2847	169	825	1217	1368	261	139	169	618	214	1094	2509	150	5460	103	513	69	5735	266	4993	580	250	52	4052	134	17	64	1941	47	35	105	9	46	12	4	23	25	597	100	3	6	38
Chd1	KY016004	TCGGCTCCGTCGACTTTTGG	4951	1023	4	21	63	41	31	8	57	191	116	14	132	42	54	8	20	76	291	12	15	11	17	228	7	54	0	9	21	0	15	2	8	12	2	3	5	55	4	7	4	0	119	24	43	16	120
Chd1	KY016005	TTTGTTTTTCGGCTCGTAGT	3398	617	14	34	37	76	395	20	15	53	105	32	52	55	188	19	10	1	4	8	75	94	212	43	110	8	1	2	233	4	5	7	0	6	3	3	28	50	1	4	388	5	3	11	3	3	30
Chd1	KY016006	TAAATTTTAACCGTTTGGTC	1877	315	1	20	7	3	17	9	77	5	8	9	9	20	4	268	5	29	4	14	4	2	18	3	660	0	0	3	0	0	0	1	0	13	8	1	0	0	3	0	0	1	4	4	5	0	78
Chd1	KY016007	TAGCACTTAATCCGTAGTAG	2092	415	10	3	17	40	32	33	0	0	74	2	78	0	3	16	46	47	1	1	0	2	2	48	11	15	0	0	3	2	2	3	0	1	1	2	4	0	0	0	0	3	0	1	1	1	4
Chd1	MGLibA_10152	GACTCCGACGACTCGTCCAG	2759	699	7	22	12	78	8	2	7	13	6	3	3	366	3	3	2	35	13	2	28	4	22	2	10	6	1	0	3	2	0	7	0	2	3	0	0	0	89	0	1	5	2	2	4	3	0
Chd1	MGLibA_10153	ACCTCGGCTCCGTCGACTTT	5238	858	8	133	68	28	208	16	153	20	59	206	1817	10	319	90	60	29	54	29	166	30	133	210	25	83	22	794	5	3	0	8	15	8	13	39	48	0	5	3	3083	5	10	117	10	1	54
Chd1	MGLibA_10154	CGCCCAGCTTCATCTAATAG	2670	756	15	95	18	4	3	5	399	5	146	26	38	3	16	78	51	5	10	11	12	3	11	2	30	14	3	1	4	2	0	4	2	6	11	4	2	3	16	1	0	2	2	16	3	5	1
Chd1	MGLibB_10151	GATCCACTATTAGATGAAGC	1145	65	2	0	2	0	0	0	7	0	0	0	0	0	0	5	0	1	0	0	0	0	1	0	0	1	0	0	0	0	0	0	1	0	5	0	0	0	0	0	0	1	0	0	0	0	0
Chd1	MGLibB_10152	GTCGTCGGAGTCTTCACTGC	5009	861	23	20	76	264	37	4842	7	23	25	21	25	12	28	14	42	4095	465	19	51	5	4	25	13	16	0	2	8	6	2	5	31	3	15	0	0	4	1	0	2	17	4	6	87	1	0
Chd1	MGLibB_10153	GCAAAACCACCAAAAGTCGA	1152	216	1	4	1	14	16	12	0	2	2	0	1	0	0	2	37	0	0	3	3	1	1	13	2	4	0	0	0	0	3	0	0	0	0	0	0	0	1	0	0	0	0	0	1	3	0
Chd1l	KY016008	AGGCTACAGCTACGAGCGTG	1965	457	55	99	125	12	88	21	10	42	5	49	30	752	3669	1084	9890	19	10	5	154	8	12	116	9	4	1	2	13	2648	1	1	6	5	10	2	4	12	331	4	13	0	70	2	15	16	70
Chd1l	KY016009	CACTCACCATCGAACAGATA	2235	568	0	6	34	24	25	10	5	5	2	0	2	3	7	7	12	1	4	1	17	2	20	288	0	211	0	1	0	0	0	4	0	5	4	0	0	0	26	2	0	8	2	0	0	4	0
Chd1l	KY016010	ACTCACCATCGAACAGATAC	1798	427	6	7	1365	26	353	22	14	1	7	6	11	7	5	118	9	7	18	5	63	20	3	178	5	30	1	3	4	66	1	311	4	0	3	13	3	9	497	0	0	0	8	4	2	9	4
Chd1l	KY016011	AGAACATCCTGACGCAGCTT	2140	415	18	13	0	2	1	74	10	0	59	1	4	9	253	6	94	38	62	9	1	5	8	2	58	14	0	0	0	0	0	1	1	2	2	0	0	2	0	0	3	0	3	8	5	2	3
Chd1l	MGLibA_10149	CGTGCTGCTGACGACATACG	4948	1016	97	10	28	77	14	12	10	57	18	15	61	476	0	14	13	24	39	13	64	3	18	29	12	41	0	1	0	0	2	6	1	1	49	2	5	5	4	3	88	10	2	5	2	3	83
Chd1l	MGLibA_10150	GTCTCCCCACCAAGTAAATG	1538	421	294	6981	28	268	77	38	269	6	74	298	18	32	21	31	40	73	20	115	11	1187	142	1191	4641	18	6	7	20	117	7	62	8	3	12	30	88	90	5	7	97	24	1	40	9	1	8
Chd1l	MGLibA_10151	TCGTCTACGTTCTTACCAAC	2735	780	2	6	668	35	21	58	16	1	6	4	7	12	131	101	1297	32	16	114	10	15	26	7	33	1	0	0	1	2	13	3	2	1	0	1	95	1	172	4	1	3	2	68	4	3	1
Chd1l	MGLibB_10148	TATCGCTCTCCTCATTTACT	6783	2109	17	720	347	537	392	675	1735	230	816	59	183	530	359	212	47	56	47	30	30	60	270	5738	1213	168	393	49	83	89	53	158	7	60	221	23	267	29	156	113	34	44	45	201	75	27	24
Chd1l	MGLibB_10149	GTCACCTGTGTATGTCACAC	3827	838	27	66	77	173	29	51	75	110	218	19	26	116	7	545	50	36	37	1	52	87	109	89	11	99	53	2	6	10	42	4	12	14	20	8	619	17	5	17	1451	59	9	12	3	25	6
Chd1l	MGLibB_10150	CAGTGCTTCCATTGCCAGAA	2258	621	98	3111	146	2440	1573	4061	159	52	684	398	5403	285	796	28	1439	540	669	2008	3207	992	872	354	105	136	20	20	36	25	142	41	628	85	34	57	159	152	1516	900	9614	47	559	171	806	29	17
Chd2	KY016013	TGGCTTCCTTAATATCGTGA	4993	529	900	12	379	11	8	5	108	13	8	346	54	21	23	9	3	78	1038	13	11	170	7	467	15	3	3	1	17	519	6	1936	8	233	1	29	31	4	1	1	15	69	8	73	5	4	5
Chd2	KY016014	TTTTTCACTTTAGACCGTGC	4896	857	20	65	38	65	131	728	37	16	34	42	17	8	822	1	91	31	147	50	63	2	46	43	6	17	4	1	9	1	0	0	4	1	0	1	14	5	4	10	2	1	47	7	32	18	2
Chd2	KY016015	CAGGTAGGAGAGAAACGATA	792	90	15	41	0	9	0	0	0	0	0	0	1	19	8	4	4	13	2	2	0	6	0	0	2	0	4	3	0	0	6	0	0	0	35	0	0	0	35	0	0	0	0	0	12	8	0
Chd2	KY016016	GGAAGCTGTCGATACAATTC	1665	588	12	8	54	4	3	5	9	1	0	28	24	225	7	25	317	16	38	10	439	6	1	20	91	36	0	0	8	0	217	1	0	1	3	2	7	0	1	0	11	25	19	6	2	1	0
Chd2	KY016017	AAGCAACCTAAGATTCAGCG	1105	48	0	20	1	2	4	0	3	0	0	0	11	5	0	0	1	3	0	2	0	2	0	5	2	0	0	0	0	0	0	0	0	6	0	0	0	6	0	0	0	0	0	3	0	0	0
Chd2	MGLibA_10155	ACCATCACGATTTAATGTTA	2310	454	0	40	55	272	314	3	51	0	46	1	4	38	31	5	14	4	53	6	9	14	3	2	3	25	0	0	10	0	2	3	0	1	0	0	3	0	6	6	0	1	4	4	15	1	2
Chd2	MGLibA_10156	TCCTTAACATTAAATCGTGA	1879	596	25	1102	33	7	235	15	40	38	82	18	46	23	0	193	129	1	9	3	127	132	4	1	2	5	3	0	8	0	93	1	2	6	13	12	14	13	0	70	1	6	0	9	7	1	0
Chd2	MGLibA_10157	CAGCGAGTCCAATAGCAGTT	2336	572	3	102	946	72	7	19	36	3	14	7	22	16	77	26	93	4	2	18	57	23	9	37	336	84	0	1	7	19	4	4	7	1	0	3	34	3	4	3	21	1	0	7	2	13	0
Chd2	MGLibB_10154	CTAGAAGACCGGTCCCTAGA	1682	357	513	121	460	1953	1494	86	39	82	3552	1061	131	118	512	886	168	889	175	11	468	203	339	815	80	1136	122	1453	1420	98	80	1667	71	199	973	49	5	270	51	670	509	98	603	3405	58	27	98
Chd2	MGLibB_10155	AGAAGACTCCGAACTGCTAT	1123	181	0	5	2	7	0	11	3	0	0	0	0	0	18	2	5	1	9	0	0	6	1	0	6	1	594	2	0	3	0	0	2	0	2	0	0	1	0	0	0	0	11	0	0	1	43
Chd2	MGLibB_10156	CCACACTGAAGGCAAGTAGC	2082	409	71	10	11	7	3	3	2	1	20	135	0	10	362	11	2	376	2	85	3	1	0	2	2	13	0	0	8	0	6	1	2	0	0	0	0	1	2	0	18	2	0	0	1	0	0
Chd3	KY016018	GCCAAGCGCCGCCTGATCGA	2852	435	2	2	239	2	8	0	0	202	5	151	33	67	13	20	3	3	3	6	4	1	43	7	205	19	0	0	0	0	0	0	0	3	1	7	0	49	1	0	0	4	12	2	0	1	2
Chd3	KY016019	CTACCGTTTCGGCATCAAGC	2129	454	7	21	0	1	0	47	8	8	151	28	23	2	3	7	146	4	1	15	6	23	3	4	2	18	4	862	3	2	7	0	25	2	4	8	0	36	17	0	7	1	0	0	10	5	1
Chd3	KY016020	TAATGTACCGAAACTATCAA	1456	573	4	17	3	8	0	6	10	0	6	33	3	43	31	0	0	18	561	5	8	534	31	2	25	4	0	2	2	2	1	1	0	0	12	14	1	0	0	0	0	0	0	3	2	3	0
Chd3	KY016021	GCCTTGACCCCGAGCTTGAC	4668	883	867	86	20	28	935	75	42	466	21	3001	118	0	15	61	626	9	98	10	50	1324	324	145	8	103	1	50	5	0	190	9	20	130	8	128	21	83	34	32	3438	5	8	8	39	53	9
Chd3	KY016022	GCAGCTGCCGACCCTTTGAA	1592	359	2	1	1	9	4	15	6	0	1	7	2	0	2	95	4	4	0	10	3	1	0	0	56	3	0	0	5	5	4	0	0	16	238	3	273	3	2	0	30	10	30	2	6	1	58
Chd3	MGLibA_10158	GGTGTGAAGAAGCGAAAACG	564	63	0	0	0	0	0	0	1	0	0	0	0	0	0	0	3	0	0	0	3	0	0	1	0	0	0	0	0	0	0	4	0	0	0	0	0	0	0	0	0	1	0	0	0	0	0
Chd3	MGLibA_10159	TGTGGAACACGTGTTCTCCG	2424	595	916	168	18	31	4	13	11	44	18	1813	879	1	6	9	23	89	15	2601	5	4	2	1	56	211	1	8	6	0	20	10	8	4	9	13	20	1	7	177	3	31	9	9	0	2	8
Chd3	MGLibA_10160	CAGCTGCCGACCCTTTGAAG	4030	783	253	63	3	252	78	1171	374	35	16	62	56	99	338	6600	63	8	37	585	23	128	42	64	2789	111	74	73	39	19	3	5	47	27	13583	150	14210	80	105	17	1300	424	1292	8	14	16	3453
Chd3	MGLibB_10157	GCCACCCCCATAGCACCATC	6125	1995	84	150	268	347	87	110	732	19178	152	339	555	144	100	224	462	259	4688	953	1052	282	881	4283	870	222	7371	139	32	113	1438	6	7	121	205	18	598	197	625	96	12371	33	2813	42	12	12	53
Chd3	MGLibB_10158	ACGAGCTTCTTCCGTTTCCT	3868	1031	12	253	73	532	124	38	15	4	25	796	49	80	31	213	6	32	10	86	5	11	6	101	14	21	22	6	8	2	0	1	0	11	4	1	10	38	10	1	37	0	23	19	3	3	0
Chd3	MGLibB_10159	TTCCTTCTTCGTTTCCGACC	8771	2148	916	266	286	65	321	71	265	92	66	162	2518	117	407	217	73	227	1180	71	61	61	471	373	4280	380	704	131	3152	21	168	20	4	109	84	11	73	14	211	202	22	2	17	391	19	6	24
Chd4	KY016023	TTGGTCTTGGCCTTGCGGAT	3902	695	141	779	12	10	93	774	708	10	13	1	103	250	22	4	32	969	59	89	24	257	3	137	0	4	3	4	29	0	2	27	226	81	0	0	8	1	0	0	0	2	11	2	3	51	0
Chd4	KY016024	GGCACACCTCGCAATAGTCC	3929	835	31	75	172	15	89	80	197	41	45	467	227	23	9	133	17	86	54	315	80	2351	81	38	555	176	22	19	20	0	4	69	3	27	24	0	27	18	1	451	3	143	11	241	5	3	2
Chd4	KY016025	GACAGAGCCATTCGCCGTTT	2801	524	0	6	0	1	13	1	44	0	33	3	5	8	60	1	8	4	5	1	1	10	10	3	8	17	1	2	1	3	0	0	0	5	0	0	0	4	0	1	0	2	0	4	1	5	54
Chd4	KY016026	CCTCCAAGGGCTTGGGCGAC	2366	874	15	51	35	992	131	24	122	18	10	19	80	3	70	20	13	11	6	4	9	60	4	102	20	166	13	5	68	3	770	3	18	3	150	597	3	1	15	3	20	63	3	8	28	25	995
Chd4	KY016027	CAGAGGAGCGCTCACTAAGA	1348	122	0	0	0	3	0	0	0	0	0	0	1	0	0	2	0	0	0	0	0	0	9	8	0	0	0	5	0	0	0	0	0	0	0	0	0	0	2	0	0	0	0	0	0	1	0
Chd4	MGLibA_10161	GCTTCGGATAAATCCTCGTC	3874	759	37	197	141	1226	14	36	308	241	918	10	18	251	178	254	247	26	448	182	37	63	55	177	22	2140	1	21	145	62	10	10	59	31	117	6	30	16	3	52	2	48	16	12	10	0	2
Chd4	MGLibA_10162	TCGGACCCTCACCAACTACA	3891	710	0	21	6	15	5	236	14	118	367	216	2	7	7	9	39	138	109	1	71	9	60	8	280	181	52	8	641	0	2	27	1	12	90	2	35	4	10	3	1	2	23	9	50	1	1
Chd4	MGLibA_10163	TCCTGACTTACCTAACAAAT	2016	478	3	38	11	27	2	7	2	0	123	1	0	20	0	1	1	2	16	2	3	2	14	8	0	31	0	0	3	0	1	1	0	1	0	0	0	1	16	1	0	1	0	2	3	11	0
Chd4	MGLibB_10160	TTGCGGATCGGCACCTCCAC	7480	2042	181	69	199	283	1346	16	2313	127	63	294	58	838	299	228	3461	118	139	105	510	152	323	159	454	49	4	4	24	15	59	8	51	122	51	8	87	10	77	14	98	18	75	18	365	11	275
Chd4	MGLibB_10161	TAAGAGCAAGCGCCAAAAAA	540	29	1	1	0	0	1	0	0	0	0	0	0	0	0	0	0	0	0	0	1	0	1	0	0	0	0	0	0	4	0	0	0	0	0	0	1	0	0	0	0	0	0	0	0	0	0
Chd4	MGLibB_10162	GGCTCTGCGCTCAGACAGTG	3373	192	1	1	528	4	4	0	4	5	5	2	45	0	17	15	7	0	0	6	2	183	12	9	9	107	0	7	0	0	0	13	1	0	0	6	1	3	0	2	0	0	2	3	0	1	0
Chd5	KY016028	AGCGCCAACAACCCGTTTAA	1513	317	40	5	283	131	5	930	4	10	77	5	8	231	12	339	8	12	19	2459	2	10	23	3	3	8	0	0	4	0	2	5	0	25	1	0	0	4	1	1	0	0	0	2	1	0	0
Chd5	KY016029	TGAACTTTGCCCTTCAGCGG	2926	470	45	135	6	71	275	242	2945	0	484	321	50	23	3272	33	89	2	83	4	40	1409	38	917	7	29	23	131	361	269	2022	100	98	2474	2	908	912	542	8238	5269	1473	1646	338	49	30	1063	64230
Chd5	KY016030	TCCACGATGGGCGTATCGGG	2988	915	30	80	17	28	48	75	25	35	75	40	789	61	6	8	8	64	25	20	7	17	24	222	43	269	78	16	3	65	2	304	3	9	0	18	3	60	644	7	17	7	8	6	7	6	2
Chd5	KY016031	TGGTACATCGACGCCACAGG	2184	537	13	0	0	1	11	3	35	0	32	11	0	195	9	5	7	3	53	8	131	5	90	0	27	27	0	0	0	0	0	1	1	1	2	29	0	2	1	8	1	1	2	3	3	17	33
Chd5	KY016032	GAGGACAACGCCATTCGCGG	1845	661	16	57	1360	24	32	90	10	527	110	78	27	171	1153	29	46	489	88	50	23	24	848	132	2	128	8	2	3	1	116	75	74	3	43	3	200	1167	0	2	1	11	4	27	3031	1	7
Chd5	MGLibA_10164	ATCTCCTCCGCGAACAGCCG	2971	565	189	33	20	23	56	29	387	4469	11	264	12	150	16544	85	19	202	39	22	4	4	17	238	183	74	20727	239	14	86	3150	31160	2133	2259	7138	49	11	104	492	831	6859	3702	3550	38821	9	294	27
Chd5	MGLibA_10165	CTCCGCCATGAGTTGTCCCG	4316	1014	112	299	5	120	79	104	150	19	55	165	36	603	50	267	51	54	62	112	55	31	168	124	142	2979	65	1	401	4	4	8	20	57	167	43	100	19	186	31	11	6	752	34	89	17	479
Chd5	MGLibA_10166	GACAACTCATGGCGGAGTGG	1645	866	23	23	62	259	2	19	64	41	7	212	59	61	5	96	97	30	324	36	186	22	6220	756	2155	48	4	0	6	31	1	0	1	8	4	16	6	2	15	8	51	927	2	9	14	14	28
Chd5	MGLibB_10163	TGACGAGATGTCAGACAACG	1556	404	0	0	0	6	0	17	70	18	0	0	1	0	0	27	0	5	25	1	0	2	0	4	1	2	0	0	0	1	0	1	0	0	2	0	2	0	2	3	0	0	1	2	1	1	3
Chd5	MGLibB_10164	GCCGGGCATGCGGGGCCCGC	4868	1558	26	61	380	185	60	474	37	176	103	254	162	53	321	206	373	323	100	10	190	283	1117	183	139	80	17	79	19	114	11	6	7	23	32	2	68	22	51	35	19	119	29	58	8	6	34
Chd5	MGLibB_10165	AAAGAGAGCAAGTCCTCCAA	1045	198	1	7	2	0	1	9	2	7	0	0	0	0	1	2	3	5	0	1	1	0	0	16	83	3	2	0	0	5	0	0	0	0	1	0	0	2	0	0	0	0	0	0	0	0	0
Chd6	KY016033	CTCGGAAGCACTCAGCGCGG	1769	661	10	30	2	99	15	5	20	52	33	2	4	4	39	234	2	90	24	12	99	27	10	16	121	94	4	0	0	44	1	41	12	0	21	4	0	6	1	8	5	13	2	1	21	5	5
Chd6	KY016034	TTATGGGGCTTTAATGGACG	1903	354	1	63	12	8	5	3	18	3	10	184	328	3	239	14	14	16	9	7	3	17	385	6	3	183	0	0	0	0	0	7	1	0	8	0	11	0	2	0	2	9	1	4	1	0	0
Chd6	KY016035	CTCCCCAAGCTCATTGCCGG	4974	1208	46	1134	40	189	39	67	145	6	556	210	294	36	407	120	55	47	59	300	36	319	63	256	29	48	29	2	36	5	24	9	16	37	212	14	11	4	11	67	15	26	486	21	5	21	303
Chd6	KY016036	GCCAGTTCATCCCCTCGAGT	4059	1245	2239	64	59	355	1588	824	7666	43	2647	194	53	12367	1267	103	1556	697	58	212	78	106	3667	8363	4684	90	6	99	3	28	175	14	2457	587	886	19	11	552	6275	9	35	22	176	24	513	46	5022
Chd6	KY016037	TAGAAAAGCTCTAGGTCGAA	411	78	0	0	0	0	0	0	0	0	0	0	0	0	0	3	0	0	0	0	0	0	1	3	0	27	0	0	0	0	0	0	0	0	0	0	0	0	0	0	0	0	0	1	0	0	0
Chd6	MGLibA_10167	GTTCTGCAGAAACGGCGCTC	1474	193	34	0	138	6	1	0	4	31	1	2	5	0	5	3	1	7308	2	2	0	3	4	0	0	0	0	6	0	5	0	1	0	1	0	0	0	0	0	0	0	2	0	0	0	0	0
Chd6	MGLibA_10168	CTTATGGGGCAGACAATGAT	1755	371	8	3	9	2	264	4	19	78	17	2	2	1	28	11	13	1	9	0	4	9	13	1	0	5	129	0	1	140	482	0	1	5	1	20	85	5	0	6	0	67	1	1	3	3	118
Chd6	MGLibA_10169	CGGAGGCCTCCCGGTGCTTC	915	199	0	7	0	7	1	2	1	0	0	0	1	0	0	1	1	91	0	1	1	77	111	1	110	9	0	0	0	0	0	0	2	0	0	0	0	0	3	0	3	3	3	3	6	0	0
Chd6	MGLibB_10166	ACCGACCTCCTGGACAGTCT	2927	581	44	35	21	37	19	8	33	24	24	11	9	10	13	15	23	43	22	21	36	233	16	319	3843	39	43	0	9	2	2	9	79	20	2	34	0	13	50	177	9	16	2	8	3	9	3
Chd6	MGLibB_10167	GGGCTGTACCTCAGCCTGCC	3207	1070	18	12	47	47	25	33	29	6	463	61	140	75	57	5	274	9	16	11	13	1113	49	3	49	14	1	14	2	8	18	5	1	10	64	3	8	2	14	3	15	1	145	2	15	5	75
Chd6	MGLibB_10168	ATGTCTTGTAGCAGGGAGCA	2116	625	16	308	142	760	48	13	15	2569	19	400	29	14	828	101	55	226	35	977	57	386	26	36	289	285	732	8	3	0	1	0	1	6	11	13	1	4	4	7	0	171	6	13	6	1	2
Chd7	KY016038	GAGACGCCAATCCGTTCCCG	2034	678	2	5	0	37	3	3	91	3	5	52	14	9	1981	42	4	3	4	4	5	43	27	7	5	8	13	0	7	0	0	0	0	0	4	20	0	0	6	3	2	2	3	1	6	3	0
Chd7	KY016039	GGCATGTGCGACAGGTGGCC	2692	637	7	4	0	7	17	3	12	109	2	2	9	5	147	6	16	2	1	10	123	11	41	18	8	512	15	0	21	2	6	1	256	13	3	3	0	5	6	30	0	0	4	3	5	1	5
Chd7	KY016040	GCTGCTGCTCTATCGACGGC	2351	577	176	8	20	12	3	165	4	1	506	175	4	5	0	0	51	308	893	34	4	7	25	101	4	8	2	0	2	734	6	3	3	9	119	1	17	5	2	158	0	53	9	3	2	66	8
Chd7	KY016041	AAGGGAATTCCGAACCTGGA	839	338	13	31	2	38	27	25	3	10	16	11	96	72	10	9	6	7	29	8	12	12	3	7	49	42	0	1	2	3	3	1	3	2	11	4	45	2	25	13	0	4	5	2	3	5	7
Chd7	KY016042	CGGCCATCAATCCTTTCGTA	4217	1243	16	449	296	307	194	581	763	13	49	12	51	30	101	32	13	19	18	74	19	44	14	342	40	43	0	0	14	9	20	3	1	25	6	14	39	8487	2	37	12	2	183	1155	8	5	177
Chd7	MGLibA_10170	GAGCGTTCTGTGCGCTGACC	4822	1759	343	78	580	46	83	132	198	53	79	548	130	40	420	35	311	132	1211	44	51	107	240	638	1422	154	5	8	6	94	8	1	28	15	9	11	22	21	22	20	0	19	41	462	25	6	6
Chd7	MGLibA_10171	GAAGGTCAAAAAAGATCCGA	522	70	0	0	0	0	0	0	0	0	0	0	1	0	1	0	0	0	0	0	0	1	0	0	0	0	0	0	0	0	0	0	0	0	0	0	5	0	0	0	0	0	0	0	1	0	0
Chd7	MGLibA_10172	ACCGTCCCCCGCTCCTGAAG	4099	745	41	25	63	310	25	5	27	2	102	1040	40	14	30	22	17	5	5	5	162	14	10	22	1	1352	234	5	8	1	1	9	1	17	9	35	87	12	4	4	114	1	22	6	1	8	1
Chd7	MGLibB_10169	TGTAGAAGAGGCGGTCCAGC	3269	949	9	59	270	25	43	49	270	149	2561	45	13	17	173	3126	11	826	46	23	442	32	1688	9	523	32	4	3	9	12	5	6	1	3	62	8	3	4	1	3	2	3	1	6	4	0	0
Chd7	MGLibB_10170	CAGCCGCCTAGTGAAAAAGC	1071	326	24632	25	33	330	820	70	246	22	155	209	731	35	122	35	172	129	47	38	38	19	322	852	4735	83	28	0	0	10	704	6	3	9	391	316	2	1	455	1	15	6	3	2	3	19	34
Chd7	MGLibB_10171	GAAGCGATACACTGAAGATT	1241	385	61	1	0	9	0	2	1	1	128	4	0	2	0	1	4	4	0	3	31	1	2	0	8	20	1	0	0	0	0	71	2	0	0	0	0	26	0	1	0	0	0	0	0	0	5
Chd8	KY016043	CAAGCACGTTGTCATCGAAT	3001	461	8	2	6	41	8	9	17	45	20	18	16	13	1	22	5	19	3	4	4	7	0	3	2	5	3	0	37	5	0	2	0	19	0	0	0	2	1	0	0	1	23	1	1	7	0
Chd8	KY016044	CAGGCTATGGTTCGGTCAGC	2838	665	61	5	15	62	14	66	45	10	18	32	109	48	14	22	13	21	19	67	1003	226	26	13	14	25	0	0	2	6	92	6	1	3	13	6	4	7	3	2	13	8	4	21	555	13	8
Chd8	KY016045	GTGGGCAACGATCTCCCAGC	2066	209	3	473	0	1	0	13	0	27	1	71	4	0	5	1	2	2	0	1	0	1	4	3	1	2	2	0	8	0	0	1	0	0	0	5	74	0	8	1	1	0	0	0	2	5	0
Chd8	KY016046	TATGCCTGCACAATCGCCCC	7605	1174	355	231	347	57	1015	46	156	116	56	16	331	210	267	103	263	79	702	34	153	29	90	621	21	108	845	31	325	6078	13	29	16	46	81	4	11	52	8	15	21	20	333	48	118	126	35
Chd8	KY016047	AGCTGTTTTACTGGTCGGCT	1127	174	4	0	0	0	0	0	0	2	0	0	4	13	2	0	0	4	11	1	2	1	2	1	2	5	0	0	3	0	1	2	2552	1	5	0	0	0	4	0	0	0	0	1	2	2	0
Chd8	MGLibA_10173	ATCGTCTGACAACTCTGACG	3481	543	70	0	11	75	18	123	5	32	8	19	86	7	12	15	19	1	5	3	29	6	14	2	91	2	26	5	0	12	0	0	2	5	7	0	2	0	3	11	0	0	1121	0	3	0	5
Chd8	MGLibA_10174	TGAATCGAAACGCATCACTT	2552	361	33	46	28	3	11	110	100	19	20	6	24	110	10	17	15	21	2	155	22	29	10	6	619	176	12	9	20	0	4	6	1	27	4	1	6	5	259	3	1	40	3	1	1	0	4
Chd8	MGLibA_10175	GGACATCGGCATGTTGTGTT	4087	572	3	1	2	22	14	5	9	21	21	4	5	5	3	8	6	16	13	3	4	4	5	2	4	0	0	0	0	8	2	0	3	27	5	20	0	0	4	55	1	1	3	3	2	0	4
Chd8	MGLibB_10172	CATACCTCGAGTCCTGAATG	4192	523	4	372	3	24	5	206	14	7	99	4	23	10	11	2	117	6	42	156	15	10	11	386	88	95	96	21	8	3	13	3	2	2	7	4	417	6	2	3	4	4	1	6	2	3	0
Chd8	MGLibB_10173	TTATGCCTGCACAATCGCCC	5849	617	6	8	67	3	12	10	5	3	10	10	14	24	84	4	45	14	55	7	8	5	7	31	2	6	37	3	46	148	0	1	37	4	4	3	0	2	10	1	2	2	81	10	5	8	2
Chd8	MGLibB_10174	CCAGTCTTCCCTGCAGTATG	7495	1387	4730	12574	1942	3269	4520	765	2182	2532	5315	7108	773	6574	3648	790	157	2318	616	817	8301	4425	1874	5643	2977	12596	3864	113	1458	1901	718	454	3026	1018	361	1898	193	5526	1120	47224	560	2173	3053	4390	57	191	543
Chd9	KY016048	TTCCCAGATCCTGTTGACGC	5342	1100	242	120	2016	212	311	842	275	181	769	39	288	615	708	605	92	514	26	325	113	90	58	369	543	265	47	269	36	160	1949	31	581	19	203	74	552	69	313	57	22	268	202	2268	41	48	45
Chd9	KY016049	AAATGGTGATTCGTCAAATT	438	11	0	0	0	0	0	0	0	0	0	0	0	0	0	0	0	0	0	0	0	0	0	0	0	0	0	0	0	0	0	0	0	0	0	0	0	0	0	0	0	0	0	0	0	0	0
Chd9	KY016050	CTGGGACCTCTGCTCGGCAT	3517	1151	112	585	16	249	260	513	73	29	109	23	132	19	91	3332	747	43	32	19	1339	161	76	30	169	88	9	4	24	36	10	22	6	4	17	74	2	1372	8	3	17	17	247	41	12	4	94
Chd9	KY016051	CTTGGAACCGGTACGCTCCT	3606	1186	37	2345	9	75	173	1	42	5	112	121	146	27	52	24	33	28	18	7	20	2	12	445	9	45	55	2	9	2	63	13	11	1	29	56	7	5	121	0	2	2	4	51	9	7	6
Chd9	KY016052	AAAACGAATCGATCTGAATC	467	49	0	0	0	0	0	0	0	0	0	0	1	0	2	0	0	0	0	0	0	0	0	0	0	0	0	0	0	0	0	0	0	0	0	0	0	0	0	0	0	0	0	0	1	0	0
Chd9	MGLibA_10176	AGCTGTCCGATGCCGAGCAG	3913	645	376	13	17	89	7	265	1	6	19	27	5	13	165	12	384	1290	16	6	8	4	71	26	28	46	20	0	0	3	8	0	0	2	152	6	1	55	1	43	0	1	5	4	4	7	43
Chd9	MGLibA_10177	CTCGGCATCGGACAGCTCAT	2154	600	290	31751	3369	22	58	60	5159	116	1036	51	396	667	181	41	20506	889	181	22950	1035	5312	6955	4051	118	2277	37	390	86	14	17509	3036	129	31	44	13	269	141	171	11	14	8	21	57	729	749	7
Chd9	MGLibA_10178	TTCTCAGGGCTCATTACTCG	4568	1107	47	346	110	116	86	31	701	110	38	43	1618	163	116	295	34	6443	69	91	297	305	21	30	20	7839	1396	20	20	832	9	26	135	95	738	99	4	14	57	19	40	161	170	20	268	49	12
Chd9	MGLibB_10175	CACTAAGCTGCAGAATACCC	2809	781	8	325	33	51	5	13	2	14	17	21	6	89	14	17	9	1	141	14	4	9	112	29	72	227	27	0	0	1	0	1	0	4	0	2	5	0	0	0	0	0	20	13	3	11	1
Chd9	MGLibB_10176	GATCAAATCGACAAATTAAG	840	95	6	0	161	12	3	0	0	10	0	0	0	0	0	0	1	85	33	0	0	1	5	0	9	0	2	0	0	11	0	0	6	2	2	1	5	0	0	0	3	0	0	0	1	0	0
Chd9	MGLibB_10177	TAGACAAAATACTAGCTTGT	870	141	7	0	0	0	0	1	0	0	61	0	0	0	0	0	0	0	13	1	3	0	0	0	3	1	0	0	1	0	0	0	0	0	0	2	0	0	0	1	0	0	0	1	0	1	0
Chmp1b	MGLibA_10242	GCCGTCAGACTTGATCCCGA	3166	623	1	37	159	21	20	4	9	30	9	105	8	305	0	17	6	7	31	4	8	77	33	10	14	1	6	0	0	0	0	1	0	2	41	3	4	1	15	0	4	2	6	3	4	2	1
Chmp1b	MGLibA_10243	ACATCGTCGTGCGGCTTCGG	3449	644	74	128	51	16	9	64	163	6	11	76	11	50	22	67	66	11	17	9	7	40	23	5	40	1	29	0	0	0	0	1	178	3	8	0	19	11	51	0	5	1	7	2	2	59	1
Chmp1b	MGLibA_10244	GTTCTTTGGCCGCGAATTTC	2199	679	8	3	2	134	9	4	16	0	65	15	22	0	78	18	7	50	1	11	346	30	48	5	0	0	6	0	1	3	2	0	6	2	0	3	2	11	0	1	0	0	1	0	1	0	1
Chmp1b	MGLibB_10241	CGAACACCAGTTCGAGACTC	1586	248	1	108	1	59	1	0	0	1	2	3	1	1	0	27	0	45	1	0	3	3	0	3	160	0	0	0	0	5	0	0	3	0	0	1	0	1	0	0	2	0	0	0	1	0	0
Chmp1b	MGLibB_10242	ATACACAGTTACGCTAACTC	2431	538	966	63	388	23	34	10	30	7	65	10985	419	204582	606	7	57	19	27	42	2	27	35	69	362	406	5632	54	453	14	23	78	4	4933	14	25	5	352	328	96	1656	3892	89	155	4	131	38
Chmp1b	MGLibB_10243	CCGCACGACGATGTCCAACA	3361	952	22	251	16	3	24	11	2	6	70	2	8	23	21	11	36	24	8	11	24	5	14	19	3	177	9	2	22	4	1	1	3	1	24	7	2	1	8	1	67	5	82	5	2	3	25
Chmp2a	KY016156	AAACTTGCGTACATATCTCC	2596	30	0	13	0	0	0	0	10	0	0	0	4	0	0	0	0	0	2	0	0	0	0	0	0	0	0	0	0	0	0	0	1	0	0	0	0	0	0	0	0	0	0	2	0	0	0
Chmp2a	KY016157	CATATCTCCGGGTACGCACC	5098	252	0	3	9	1417	6	1	1	0	29	0	2	0	3	0	20	0	0	3	2	1	0	5	1	1	1	0	2	0	2	0	2	0	3	0	0	0	0	0	0	1	0	3	2	2	0
Chmp2a	KY016158	CAAAAGACCTGGTGCGTACC	2786	268	3	4	10	52	15	27	237	14	3	0	7	5	2	2	63	56	14	27	5	23	4	8	214	16	0	2	15	1	4	4	59	5	4	1	1	58	7	1	0	0	2	4	0	2	760
Chmp2a	MGLibA_10245	CAAACTTGCGTACATATCTC	1261	180	0	0	0	1	0	1	12	1	0	0	0	154	4	0	0	0	0	27	3	2	0	3	617	1	0	0	5	0	10	0	0	0	1	0	6	3	12	0	0	85	0	1	1	1	0
Chmp2a	MGLibA_10246	GCAGGATGCTGTTCGAATCA	2444	376	1	2	4	1	0	1	0	0	2	136	5	0	9	0	1	26	2	4	5	58	0	1	1	5	0	0	2	0	0	0	0	5	0	0	2	0	2	0	0	1	0	0	1	5	5
Chmp2a	MGLibA_10247	TCTGCAGACCTTCCCTCCAC	7081	1079	28	359	263	51	41	325	11	10	148	40	42	17	98	32	132	8	13	23	28	18	56	62	25	36	25	412	8	11	363	3	34	5	29	2	10	17	138	25	4	159	245	11	4	4	18
Chmp2a	MGLibB_10244	TAGTGATGCTGTTGTGTCCC	6951	1308	44	67	15	38	45	37	10	16	25	27	39	95	471	59	133	142	58	93	172	134	179	39	139	54	43	2	0	4	10	3	51	13	22	2	14	3	5	1	0	18	4	7	11	22	2
Chmp2a	MGLibB_10245	CACTTGACAGCTCATCTGTG	4306	65	0	0	0	0	0	0	0	0	0	1	0	0	0	0	0	0	0	1	3	0	0	0	0	0	0	0	0	0	0	2	0	0	0	0	0	0	0	0	0	0	0	0	0	4	0
Chmp2a	MGLibB_10246	GGCTCACTCAGTGTGGCAGC	2703	300	2	12	0	4	0	12	15	4	1	0	0	0	0	3	1	1	1	1	2	4	2	2	14	0	1	0	3	0	0	2	0	2	0	0	0	2	1	0	0	1	0	3	1	0	4
Chmp4b	KY016170	ATTTTTGGTGCCGTGCTTCT	5213	947	427	1624	185	161	145	53	73	186	83	404	1711	793	7	205	902	229	15	45	19	89	67	101	129	13	3418	24	31	17	11	12	5	32	50	14	1144	22	1	1	60	13	22	286	5	23	22
Chmp4b	KY016171	CGTCTCACCGCGTTTATTTT	3092	898	105	404	1457	1081	37	66	183	72	2728	243	1561	104	284	150	1675	224	108	344	16	27	223	160	900	37	4	36	26	2	133	294	4	164	329	3	74	13	607	19	1	12	346	252	21	20	298
Chmp4b	KY016172	TGTCAACCATCGAGTTCCAG	3813	274	0	19	11	670	37	14	65	191	20	2	11	7	18	4	82	21	11	62	31	2	8	317	25	15	0	1	2	2	1	0	7	22	1	8	0	3	4	0	1	5	54	3	83	2	0
Chmp4b	KY016173	GTTGGTGTTGGCGTTCTCTA	2064	106	0	11	0	4	0	0	2	8	7	3	53	0	0	18	0	2	2	3	2	0	0	4	1178	0	0	0	0	0	4	0	0	0	0	0	0	0	1	0	0	0	0	1	0	0	1
Chmp4b	KY016174	GTTCTTGAGCACCTCCGTGT	2503	62	71	513	332	165	198	785	17	36	23	6	210	15	88	37	17	15	61	126	115	0	73	50	5	56	25	11	14	252	35	55	17	7	51	8	1922	18	342	22	3	71	939	39	28	6	184
Chmp4b	MGLibA_10254	CTTTGGAGAAGAGTTCGACG	2047	262	0	6	1	2	5	2	1	1	1	1	0	4	4	20	0	0	3	0	0	0	0	1	1	0	0	1	0	0	1	2	0	0	0	0	1	0	0	0	0	0	0	1	2	0	0
Chmp4b	MGLibA_10255	GCATACTCACCGGGTTTGGA	1758	154	0	0	0	1	0	1	1	0	0	2	0	0	0	0	0	0	0	6	1	8	647	3	0	0	0	0	0	0	0	1	0	0	0	0	0	0	12	0	0	10	0	0	3	0	0
Chmp4b	MGLibA_10256	CTTCCCTCTAGCCGCCCTGC	5447	778	41	378	160	483	31	690	124	4	5	811	50	4	1145	73	10	9	17	49	301	12	26	167	147	7	3	1	7	0	2	5	2	1	26	2	71	5	20	9	5	5	1729	1743	2	4	9
Chmp4b	MGLibB_10253	GCAGCACATACATGTTGTCG	1759	141	0	1	0	8	8	9	0	4	1	0	398	11	2	160	1	0	6	0	1	2	1	0	3	30	10	2	0	0	0	17	0	1	14	0	0	0	1	1	0	0	0	0	1	0	0
Chmp4b	MGLibB_10254	GTAGCCCTACCATCCAAACC	2378	176	0	0	0	0	1	0	0	1	5	1	0	1	0	1	0	5	0	2	122	3	5	1	3	1	0	0	1	0	0	0	0	0	0	0	4	1	0	0	0	0	0	0	0	0	0
Chmp4b	MGLibB_10255	CTGGAACAGTTACATGGATC	2168	309	8	9	25	93	248	191	16	1099	2	60	127	644	1153	81	51	590	68	21	10	24	54	68	10	238	0	0	8	192	0	65	1	609	5	72	4	51	6	3	1	0	522	5	3	7	11
Chmp4c	KY016175	CGAGTTCCAGCGAGAAGCGC	1838	434	5	18	17	2	0	3	0	0	10	4	0	0	12	0	9	27	0	26	0	1	0	4	2	3	0	2	0	2	0	0	4	0	2	0	0	2	7	0	0	1	4	3	1	3	0
Chmp4c	KY016176	GGAGAACTCGCACACCAACA	1413	234	10	5	15	45	22	89	19	54	280	16	16	12	4	5	83	10	163	32	2	0	9	9	7	5	30	47	10	23	5	22	4	47	50	2	2	2	33	40	0	0	6	3	4	4	14
Chmp4c	KY016177	ACACCAACACGGAGGTCTTA	1237	419	0	15	11	114	3	1	1	5	28	45	7	0	30	2	3	42	3	6	2	3	65	0	3	2	0	0	1	1	0	0	0	2	6	1	171	1	1	1	0	0	9	1	2	2	1
Chmp4c	KY016178	CACGGAGGTCTTACGGAACA	2358	617	29	1625	2	253	7	158	210	7	235	590	110	166	144	19	6993	6	1035	3	2	28	25	118	41	11	18	0	13	19	331	0	2	1	20	0	3	1546	2	362	29	45	19	5	1	7	9
Chmp4c	KY016179	ACGGAGGTCTTACGGAACAT	1887	296	1	0	3	18	9	0	11	0	0	5	46	2	44	2	455	4	13	2	3	1	0	3	4	26	0	0	0	0	0	2	0	1	0	0	0	0	2	1	0	0	0	0	1	0	0
Chmp4c	MGLibA_10257	GTTCCGTAAGACCTCCGTGT	2201	350	49	22	308	0	57	2	0	3	0	0	99	19	22	0	21	1	12	27	4	2	1	3	15	6	0	0	0	0	1	2	0	0	1	0	1	33	16	0	0	0	2	5	0	0	1
Chmp4c	MGLibA_10258	ACCTACCTCATCGAAGCCAT	3516	582	16	144	775	36	374	101	26	52	297	95	117	137	890	47	120	13	922	27	47	52	45	799	56	278	39	93	7	4	3	12	22	272	2548	2153	34	253	126	55	10	15	266	54	5	22	31
Chmp4c	MGLibA_10259	AGTTCTCCAGCGCTTCTCGC	3411	539	4	3	55	3	61	36	41	22	43	165	1	64	14	7	128	1	157	11	54	11	60	364	285	36	31	0	5	123	2	0	2	38	2	3	195	8	2	14	2	0	4	4	3	0	0
Chmp4c	MGLibB_10256	GTTTGCCGATGGCTTCGATG	4645	842	3	1	27	20	444	56	1017	7	10	190	6	19	67	22	21	14	82	173	6	29	39	381	12	16	24	7	2	7	2	151	3	13	19	50	94	116	375	5	70	261	8	15	46	2	1
Chmp4c	MGLibB_10257	GGAACAGACCTGCTCGAGAC	1398	65	0	0	0	0	3	0	0	2	3	0	3	1	0	0	1	0	43	1	1	0	1	4	0	1	0	0	0	0	0	0	0	0	0	0	0	0	0	0	0	0	0	1	0	0	0
Chmp4c	MGLibB_10258	GCATGCCCTCCTCCGTGCAC	10112	2009	367	6651	313	2302	41	147	2281	55	4319	45	165	150	815	534	378	252	284	300	1478	65	846	443	2155	572	20	28	138	134	1747	129	105	97	836	688	65	2125	42	62	9	52	46	133	21	20	41
Chmp5	KY016180	TGACAAAAAGATTTCCCGGC	1147	91	3	6	0	0	0	1	0	0	0	0	0	0	2	0	0	0	0	1	1	3	0	0	1	0	0	0	0	0	0	0	0	0	0	0	0	0	0	3	0	0	0	1	0	0	0
Chmp5	KY016182	TGTTAAAGGACTGTTGGGCC	2386	354	7	26	7	4	56	0	0	4	15	1	92	3	3	30	20	1	3	0	1	20	1	23	51	37	0	1	1	2	0	0	10	2	2	1	0	20	5	0	0	0	40	1	2	1	0
Chmp5	KY016183	TATGGGGCATACCGTGGTCT	3940	906	16	1799	54	263	25	148	248	1544	62	124	162	9	5324	116	377	64	16	19	70	41	29	171	5	365	8	77	2	3	7	9	25	7	26	1	21	4	6	4	46	11	2	7	336	9	17
Chmp5	MGLibA_10260	TGAGCAACAGCGAGACAACC	1499	262	0	0	1	2	1	0	0	1	58	0	4	1	15	0	2	3	1	5	3	2	6	43	6	68	0	0	0	0	0	0	0	0	0	0	0	0	0	0	2	2	0	0	2	0	0
Chmp5	MGLibA_10261	TCACTAGTTCAGCATCCAGC	2531	95	0	0	0	5	0	0	0	0	8	0	3	0	0	0	14	0	0	0	0	1	2	0	1	1	0	0	0	24	0	0	0	9	0	0	0	0	0	0	0	83	0	1	0	1	0
Chmp5	MGLibA_10262	TGCTGAACTAGTGAAATATA	1092	163	1	0	0	0	0	4	22	0	0	4	0	0	1	0	0	0	0	3	3	1	3	0	0	0	1	4	0	0	0	0	0	0	0	2	5	3	0	0	0	0	1	3	1	4	0
Chmp5	MGLibB_10259	TTAGGTTGATGCCATGAAGT	2541	257	0	28	0	1	0	11	0	0	1	0	0	2	1	0	0	5	0	0	1	1	1	1	58	2	0	0	0	0	0	0	0	0	1	0	60	0	0	0	1	0	0	4	1	2	0
Chmp5	MGLibB_10260	TTACACCATCCAGTCACTAA	2788	388	141	1285	24	136	316	114	16	18	98	49	5	75	2	49	3309	76	10	26	1726	330	28	67	16	836	1009	21	5	13	697	0	23	68	42	2	60	2	16	2	76	0	3	3	18	864	72
Chmp5	MGLibB_10261	GGAAATGAAGAAGGCATATA	554	59	0	1	69	0	1	0	7	70	1	0	0	0	0	0	0	1893	2	1	2	0	541	0	2	1	0	2	265	3	2	0	48	0	0	0	0	0	0	0	1	1	0	1	1	2	0
Chrac1	KY016221	CGAGGTGTCGAGCATCAACC	3174	1814	400	5081	1537	1028	3717	281	283	1301	10883	696	913	1890	358	6771	2001	16239	243	237	225	425	12869	2237	1032	3575	1071	215	14096	29386	66	236	1763	727	1722	124	1911	81	265	172	94	83	292	31	49	70	690
Chrac1	KY016222	GGTGTCGAGCATCAACCAGG	1087	111	2	0	0	2	1	0	0	0	0	1	3	2	2117	0	2	0	0	0	1	0	0	0	0	0	0	0	0	0	0	0	0	0	0	2	2	0	1	0	0	0	0	4	2	2	0
Chrac1	KY016223	TGGTTGATGCTCGACACCTC	3596	875	1598	1397	11	654	1094	882	167	394	744	63	568	796	1928	2113	130	244	766	272	820	2068	208	312	5	136	8551	504	1491	932	4265	12084	401	141	15486	490	27314	465	1025	11115	16026	1396	992	889	306	32	79
Chrac1	MGLibA_10299	GGGGCAATGACACGAGCCGC	932	147	0	0	0	1	0	7	0	0	1	0	1	1	1	10	652	0	0	0	28	5	0	5	0	3	0	1	0	0	0	0	0	0	1	0	0	12	0	2	1	10	21	3	1	2	0
Chrac1	MGLibA_10300	GACGCGGAAGATGGCGGACG	716	83	8	0	23	1	11	0	2	1	2	4	1	0	0	6	0	1	0	0	2	1	0	0	0	0	1	133	4	0	0	1	0	5	0	0	0	0	0	0	0	0	0	0	0	3	0
Chrac1	MGLibA_10301	GAGACACTTCAGTTTCTCGC	2215	446	2	126	5	52	6	4	2	6	5	4	20	0	58	46	65	4	8	2	3	14	23	3	1	0	0	0	1	2	1	0	0	0	3	1	0	3	0	2	1	0	0	7	0	1	1
Chrac1	MGLibB_10298	TTACTAGCTAAAATCTTCTT	1205	231	0	0	0	0	0	0	0	2	143	0	20	20	3	27	5	0	0	0	15	1	5	8	479	0	0	4	0	0	0	0	0	0	14	5	1	0	1	0	0	0	0	1	5	0	0
Chrac1	MGLibB_10299	AAGCGACCTTGGTGAAGCCC	2335	567	24	10	24	4	13	3	43	0	68	16	4	26	3	1368	14	9	20	32	873	11	12	16	209	86	1	0	4	19	1	8	0	2	2	122	0	1	8	3	4	2	2	6	8	2	0
Chrac1	MGLibB_10300	CGACTTAGCCAGCACTGCAG	3138	781	13	10	38	34	20	19	19	4	45	1	217	3	999	118	49	12	11	12	0	16	50	5	31	110	0	3	222	1	64	20	3	2	12	2	2	4	3	0	2	3	4	4	62	6	1
Ciita	KY016487	GCTGAACTGGTCGCAGTTGA	2973	545	5	0	79	82	76	1	7	7	26	4	15	2	9	8	10	109	110	1	37	16	9	1	4	24	0	1	23	2	5	0	1	9	1	2	6	1	9	0	0	73	13	2	3	47	0
Ciita	KY016488	ACGGGAGGTCAGCGCAGGTT	2688	593	1000	384	537	13	182	0	35	91	1700	10	0	48	133	949	51	112	14	3	1	35	11	15	0	38	2	0	2	0	0	1	1	6	3	4	3	8	82	0	0	1	2	338	4	0	2
Ciita	KY016489	TCATTGCTTGGATCGTCCCG	9970	2260	53	609	110	3544	1223	157	503	2872	471	205	428	370	138	26	324	916	711	242	79	44	217	1622	226	22	683	770	28	1048	50	30	2727	1124	563	78	1131	501	115	788	4810	35	924	5408	101	259	118
Ciita	KY016490	TTCCAGCGGAAGCTACTGCG	4027	779	611	2	315	344	32	31	247	138	75	7892	56	48	59	61	163	66	105	98	86	42	1551	59	107	32	24	0	0	8	2	9	131	43	8	105	314	25	31	20	0	15	3195	24	10	26	6
Ciita	KY016491	GACAGAGCAGATCCCGCAGG	1255	172	0	4	17	0	13	1	4	1	34	1	6	0	0	0	0	0	0	0	6	0	4	4	0	16	0	0	0	0	8	0	0	0	0	0	0	0	3	0	3	0	1	2	0	0	3
Ciita	MGLibA_10467	ACTGGATCAGTACGTGTTCC	2135	880	1969	35	169	21	8	123	20	51	40	102	845	83	51	7	31	11	25	753	26	10	3454	36	9	56	3	2	16	127	21	12	2	31	163	0	2	3	27	1	3	23	7	7	11	80	43
Ciita	MGLibA_10468	GAGGAGATCGAACTCAGCTC	837	77	0	0	0	0	0	0	0	11	0	0	0	0	0	15	0	0	0	0	0	0	0	1	0	0	0	0	0	0	0	0	0	0	0	0	0	0	0	0	0	0	0	1	0	1	0
Ciita	MGLibA_10469	CCTGCAACAGCTTGCTGAAC	2861	839	1	12	1	73	46	7	2648	19	49	2	40	57	3	20	51	7	31	33	21	21	15	34	12	70	82	1	7	36	26	4	37	4	89	1	6	1	0	1	0	20	2	5	12	3	3
Ciita	MGLibB_10466	ATAGAGATCCCTGTAGAAGC	1023	98	0	2	0	0	0	0	0	0	0	0	2	5	0	0	0	0	16	0	0	0	3	54	3	0	0	0	0	0	0	0	0	0	0	0	0	0	0	1	0	0	0	52	2	0	0
Ciita	MGLibB_10467	CCAGTTCAGCAAGCTGTTGC	4441	983	51	224	125	112	36	32	359	471	117	233	54	123	355	103	529	23	42	24	17	86	43	192	671	206	28	10	66	13	9	9	91	1072	33	10	12	45	326	67	128	19	183	10	118	190	37
Ciita	MGLibB_10468	TACTGAAGAGGTCCTTGCTC	3550	745	380	169	86	83	226	74	58	144	102	242	84	242	343	45	220	133	435	280	333	267	1111	109	21	165	10	238	68	151	258	99	24	135	84	11	40	271	22	43	26	33	70	21	8	21	532
Clock	KY017035	GCTGAAAGACGGCGAGAACT	1301	209	0	0	2	12	0	1	0	9	2	4	0	4	2	862	0	0	0	0	0	0	0	3	513	4	11	0	0	27	0	0	1	0	178	1	0	0	0	1	1	3	0	1	0	1	12
Clock	KY017036	GAACTATACAACGCACACAT	2298	693	56	357	2523	222	984	87	1892	29	73	124	9999	1902	2664	551	412	130	48	648	1587	1768	1040	44	275	91	7	3	192	37	931	19	25	11	136	44	20	9	57	33	23	120	49	116	51	3	226
Clock	KY017037	CTAGTGAGATTCGACAGGAC	2188	303	1573	1033	31	0	138	1993	11	194	10	3	43	16092	91	12	20	2	0	2	215	7	151	5	4	0	1	0	9	0	0	4	4	0	0	12	28	6	205	0	0	2	8	2	3	280	1
Clock	MGLibA_10854	AGATGCTAGTGAGATTCGAC	1551	241	1	2	0	21	8	1	2	0	1	0	0	11	20	3	0	0	0	0	1	3	4	1	2	264	0	0	1	0	1	0	1	0	1	0	0	5	0	0	0	0	0	0	2	1	0
Clock	MGLibA_10855	TCCTGGTAACGCGAGAAAGA	853	206	0	41	0	0	14	0	0	0	6	0	0	0	2	0	1	0	0	2	3	5	0	0	1	1	0	0	0	0	0	0	0	206	0	4	0	0	0	8	0	0	60	0	0	0	3
Clock	MGLibA_10856	TCCATCTTTCTCGCGTTACC	6935	2216	1322	2584	1341	2744	1359	2596	1692	3543	2043	2431	895	6146	3617	1688	1640	469	2135	3114	1749	1981	10474	13652	15241	5531	820	285	383	135	1381	516	1036	2527	7749	1062	3915	2504	582	552	3603	4293	2780	4708	873	221	1370
Clock	MGLibB_10853	ACTAGCATCTGACTGTGCAG	2143	391	13	480	32	0	46	112	11	11	25	10	12	3	0	6	0	6	239	10	50	188	3	159	5	10	1	1	10	0	8	98	3	21	86	6	0	4	1	0	8	0	114	5	64	1	5
Clock	MGLibB_10854	ATTGGTGGAAGAAGATGACA	862	185	121	14	2375	225	12	127	354	5779	206	27	61	116	39	21	244	177	1300	741	6	797	14	3	9	366	11	1836	39	74	9	333	1	2043	2743	1	11	1	15	160	97	316	435	358	182	8	1152
Clock	MGLibB_10855	TAGACCCCAGCTCCTTAATG	3774	769	14	937	57	30	68	9	49	93	1966	814	25	1874	841	38	45	15	37	102	37	12	170	13	74	10	2	7	34	3	33	30	18	41	14	2	95	11	40	0	28	3	5	30	4787	10	6
Cml1	KY017181	TGGCAAGGAGCCGCAGAAGT	1286	389	14	837	19	15	0	14	54	14	3	12	33	6	389	2	90	2	29	3	44	54	44	20	12	217	8	7	4	2	10	213	1	2	11	1	4	4	404	12	11	15	2	0	3	6	1
Cml1	KY017183	AGCATGTGCCGAAAGGTAGA	1397	231	336	98	97	6939	15	12	55	4	9	16	13	22	2	337	37	24	48	24	7	12	846	251	248	462	463	37	9	8	0	36	57	14	32	3	37	289	410	25	10	65	6	3	9	397	3383
Cml1	KY017184	AGTACATTCCCTCTACCTTT	3549	947	135	163	198	201	2648	58	751	89	121	152	33	161	1122	735	82	143	40	22	58	92	374	98	1006	3161	532	49	112	419	163	7	614	393	1939	23	115	25932	23	41	6	4883	222	26	23	144	44
Cml1	MGLibA_10956	CAGCATAAGCATGTGCCGAA	1474	286	0	0	18	0	1	0	0	31	4	0	4	0	0	0	4	0	1	1	9	0	0	9	28	36	0	0	0	0	0	0	4	0	41	0	3	3	0	2	0	1	0	0	2	3	0
Cml1	MGLibA_10957	AGTACTTCATGAGTATATTC	1661	255	21	1	1	57	80	23	0	4	18	0	113	3	15	0	79	1	946	19	2	3	1	109	34	1	2	0	0	0	0	10	3	11	0	0	13	0	0	0	1	0	6	3	0	0	3
Cml1	MGLibA_10958	AATGTACTCCTCCATGCCCT	4213	822	8	5	0	13	1	5	16	5	24	6	5	2	128	7	3	218	31	5	3	44	2	25	4	1	0	2	1	0	0	6	2	1	10	1	3	1	1	0	0	0	4	4	5	4	0
Cml1	MGLibB_10955	AGAATATACTCATGAAGTAC	1003	285	2	2	8	1039	54	24	4	0	10	0	5	36	3	1	59	5	24	181	2	2	4	19	167	7	5	2	32	0	289	1	0	9	1	17	4	5	0	3	10	2	2	0	1	57	0
Cml1	MGLibB_10956	AGCCACCCCTCCTAGGCAGA	2839	466	9	28	4	20	4	2	21	3	2	5	1	3	1	2	18	10	8	6	2	1	76	31	2	8	1	0	9	212	0	0	5	0	6	4	0	0	1	4	36	4	11	4	2	1	6
Cml1	MGLibB_10957	TGGTACTGTCGGATGTGATA	3798	922	247	85	274	106	38	216	50	7	48	25	68	155	11	20	234	3	53	55	31	6	478	73	181	459	4	29	2	9	18	66	52	11	70	0	30	303	8	26	24	44	108	9	17	350	1836
Control	mCTRL0001	GCGAGGTATTCGGCTCCGCG	4781	1434	870	4307	670	21733	1830	1687	4596	2790	667	2143	2000	15892	5568	823	632	1671	438	206	1444	3001	2676	4734	3530	1827	486	137	302	1951	321	196	7055	354	5225	2630	64	20692	978	493	1227	757	2806	293	50	318	51
Control	mCTRL0002	GCTTTCACGGAGGTTCGACG	2571	439	6	59	41	4	10	10	19	2	44	16	117	1	16	21	28	19	8	9	31	149	16	78	81	10	0	0	0	10	1	2	3	7	11	2	9	1	3	4	2	11	7	0	2	0	14
Control	mCTRL0003	ATGTTGCAGTTCGGCTCGAT	3415	1047	21	633	51	233	43	552	54	48	34	9	37	49	38	7	38	467	717	4	12	4	279	86	222	63	3	0	9	2	7	8	3	3	5	143	6	7	2	265	1	36	43	10	24	15	554
Control	mCTRL0004	ACGTGTAAGGCGAACGCCTT	1058	469	0	16	0	0	25	6	13	13	2	1	2	22	4	0	1	3	0	10	4	2	36	5	0	5	2	534	2	0	1	52	24	2	2	2	1	0	0	0	0	0	0	1	4	2	6
Control	mCTRL0005	GACTCCGGGTACTAAATGTC	2068	189	201	17	11	0	12	6	1	5	13	0	2	6	0	0	5	0	89	16	0	0	79	3	21	0	0	0	4	0	46	0	0	4	4	0	1	0	0	2	8	1	10	0	2	2	0
Control	mCTRL0006	CCGCGCCGTTAGGGAACGAG	2643	941	285	233	27	949	217	45	141	10	65	20	16	245	54	94	75	58	1041	195	803	67	78	60	219	24	2	12	45	10	276	5	4308	446	5	19	485	195	2109	48	66	22	27	6	107	3587	180
Control	mCTRL0007	ATTGTTCGACCGTCTACGGG	2731	821	1708	299	9300	96	3693	375	396	265	2500	216	992	577	14	3643	1392	1590	503	256	700	72	119	115	7027	1766	19	5	42	11	6	17	3	36	254	190	55	45	2	13	10	4	61	25	43	1	10
Control	mCTRL0008	ACCCATCGGGTGCGATATGG	3172	951	26	12	187	60	2845	194	36	102	208	18	29	2605	80	130	43	2580	13	177	55	87	14	1159	832	13	1	2	24	12	1	72	6	27	4	200	432	12	26	44	128	2	34	43	6	7	4
Control	mCTRL0009	CGGGCGTCACCTGCTAGTAA	2724	1011	27	88	65	104	205	224	315	53	35	14	12	188	18	483	37	8	101	826	43	66	11	55	168	3	4	0	8	28	30	13	3	12	38	1	8	3	7	1854	3	10	7	17	4	4	0
Control	mCTRL0010	GCTTCTACTCGCAACGTATT	2627	916	25	165	359	784	94	11	103	8	48	100	38	89	666	1	200	1	15	189	5	33	159	270	162	10	1	0	33	3	430	2	1	15	1	36	70	49	21	12	28	38	6	17	0	0	3
Control	mCTRL0011	TACAGTTATACGTCGCGGTG	2606	1407	537	4910	5084	129	4976	1583	867	692	3381	707	281	223	1024	3603	2764	1359	885	230	278	15509	174	239	7241	898	56	9	76	1019	561	296	5	156	28	28	848	68	303	67	106	14	1707	144	12	60	20
Control	mCTRL0012	AAGCACAAGAACGGTCCGCC	1258	557	0	5	8	9	43	16	0	6	10	14	11	12	8	127	0	39	5	1	41	12	2952	0	27	9	5	0	0	2	0	0	1	1	0	1	0	0	0	1	0	0	1	1	5	0	2
Control	mCTRL0013	CAGCCACCGCACCGGCGTAA	2804	2056	447	31974	2363	9170	15582	7752	19384	15833	33239	4949	2108	15129	7006	2093	20807	7366	10121	39251	4519	35250	15910	20539	5476	14861	1428	7560	26264	995	1773	2661	6108	20456	11135	9777	12111	13581	27273	1027	1345	521	121658	342	474	4218	22181
Control	mCTRL0014	GTCAAGCCGAACGCTGCCGG	1913	774	325	16749	1929	20881	1738	716	584	250	3513	3550	4132	3568	2393	830	6044	1096	1549	4142	328	749	3475	991	1756	683	458	51	1868	522	12524	7250	2111	1054	2031	119	1689	260	305	184	116	56	2497	370	2088	168	98
Control	mCTRL0015	CCTTAGACCGGGTGTACCTC	3793	1511	36	1561	48	51	80	128	435	16	342	25	239	40	137	2967	284	221	4384	27	84	109	75	6004	160	607	466	15	12	63	3	11	7	27	46	17	25	100	28	34	35	80	13	8	12	1	24
Control	mCTRL0016	AAGTCTATGCGGGGCTCGTA	1597	317	0	15	74	26	34	9	12	27	104	1	1	0	1	0	0	1	10	4	2	0	16	0	0	1	2	0	42	1	0	1	1	0	49	0	1	0	0	0	0	0	3	3	1	0	2
Control	mCTRL0017	TTGTCAACTTCGGCCAACGC	4566	1831	5956	352	486	3597	408	385	350	1709	568	1037	1079	2667	547	285	300	365	382	89	1986	220	410	386	1665	960	48	58	86	593	7829	1057	1661	1111	5866	99	182	222	97	38	52	558	2622	1115	48	72	145
Control	mCTRL0018	ATAGATGTCTACGCGCCGTT	3862	538	6	10	28	90	14	11	5	6	78	728	7	12	20	32	19	29	11	12	157	4	6	243	1	46	11	0	1	1	8	2	93	9	3	5	3	2	5	4	17	1	3	3	1	1	0
Control	mCTRL0019	CTCGGGCTATTCAGCGATAG	1464	685	548	691	1138	549	1130	552	2512	384	742	3456	1593	6572	928	580	233	11493	1377	1899	828	2634	1133	1066	291	1650	509	214	202	213	168	330	43	147	240	146	171	3798	346	485	41	412	553	188	14	534	735
Control	mCTRL0020	GCGGTTACCGCGAAAACCAT	1715	580	3	10	2	14	4	6	142	433	5	4	6	6	36	409	1874	39	3	335	27	93	26	6	53	4	6	391	24	0	4	0	4	6	12	0	2	7	17	14	0	1236	4	450	5	130	1612
Control	mCTRL0021	ACCAACGCTACGATCCCGGA	2214	408	17	1625	0	0	25	4	5	150	4	10	0	16	3	28	234	2	9	3	3	21	29	92	32	31	0	5	584	0	5	0	24	34	0	6	0	3	2	23	11	1	0	1	3	1	1
Control	mCTRL0022	CCCTATATGCGAGATCCATA	3303	856	2	6	2	89	4	17	20	7	264	73	23	4	26	69	11	308	6	5	9	16	26	34	56	56	4	14	3	2	7	5	19	16	8	0	17	30	26	65	0	0	13	147	11	0	31
Control	mCTRL0023	AGAAAGGCACGTGCGACGTC	2048	668	0	11	6	38	92	12	213	2	39	34	23	69	9	14	23	14	5	1	4	22	4	179	10	32	3491	29	17	118	1	2	2	35	2	4	7	27	1	86	23	0	5	9	6	0	30
Control	mCTRL0024	GACCAACCTTACGGTAACTC	2134	871	739	175	26	96	36	13	46	149	221	127	65	338	26	353	18	27	90	492	26	84	371	50	79	3591	5	23	38	126	6	9	753	10	330	83	378	8	102	61	1	5	3454	921	10	6	58
Control	mCTRL0025	ATTATTCCTCCGGATGACGA	2598	372	27	113	21	13	8	43	12	1	22	14	12	3	10	0	59	20	6	2	20	0	352	1	105	4	1	0	0	0	0	0	2	1	0	0	0	8	1	0	7	0	3	1	1	0	3
Control	mCTRL0026	TCTCAGTTCGTAGCGAACGA	3089	1579	10	76	42	263	43	214	80	25	467	17	188	289	38	99	16	110	5864	184	45	24	66	3842	179	363	45	2202	80	4	14	17	8	91	26	8	158	37	323	48	1288	1358	164	72	1359	8	355
Control	mCTRL0027	TCCCGGGAGGTACGGTGTAC	501	92	0	0	1	0	0	0	0	0	0	0	1	2	0	0	0	0	1	0	1	1	0	2	0	0	0	0	1	0	2	0	0	1	0	0	1	502	0	0	0	0	0	0	0	0	0
Control	mCTRL0028	GGGGATGGCCTTACGTCGCG	2808	1008	10	6	22	43	7	275	10	11	6	14	1759	0	1	272	162	4	7	11	16	38	113	22	1324	36	3	1	29	2	5	1	2	2	21	2	31	0	2	1	6	39	3	8	9	0	3
Control	mCTRL0029	GTATCCTCCTTACGGCCCGT	4154	979	201	7	68	31	64	21	117	18	40	31	219	343	519	13	21	8	12	13	19	56	22	2	43	64	3	0	5	2	8	0	0	42	16	100	5	8	3	0	11	2	38	3	7	2	20
Control	mCTRL0030	GCTCGGACCTTTTAGACGTC	3433	1082	62	103	834	262	196	94	72	130	83	24	136	713	77	52	131	304	155	77	123	68	39	155	709	273	477	153	89	288	210	32	36	105	29	9	35	3	40	199	88	35	54	114	25	1326	29
Control	mCTRL0031	GTGGTTACGTTAACGACTAC	2354	564	2	0	2	6	113	0	4	6	4	38	1	1	32	5	2	0	4	36	3	5	21	21	5	5	12	0	1	0	1	1	19	19	6	0	7	3	2	0	0	1	1	5	4	0	10
Control	mCTRL0032	TGCAACGATGGTTACGGTAC	3115	1710	770	22	310	75	105	9	44	13	26	26	234	5145	111	2	83	273	78	250	178	276	52	35	130	557	2147	52	5	7	18	18	6	26	120	6	41	14	61	13	4	5081	596	17	443	46	13
Control	mCTRL0033	AACGGGCGCAATACCCTTTT	3348	665	14	50	201	216	3	20	48	164	131	72	41	150	552	271	22	155	28	9	52	31	9	49	70	45	4	12	2	3	14	2	2	19	7	4	4	2	22	4	8	6	158	5	7	5	18
Control	mCTRL0034	TCGTGTCTAGCTATCGAGTG	2740	406	11	259	28	32	177	3	53	23	11	11	201	12	64	148	90	1112	119	87	138	5	61	717	6	114	9	350	45	3	3	60	0	2	89	0	19	1	35	42	2	6	321	2	20	6	10
Control	mCTRL0035	GACGTCTAATTTCTGGCCGT	1389	377	45	914	1	97	46	31	347	190	34	69	26	5	92	167	34	58	13	8	26	11	56	24	253	2	14	11	3	2	1	2	1	397	29	4884	7	7	165	9	96	16	4	10	4	176	11
Control	mCTRL0036	TAGTCCTAGTTAGATTCGCG	3973	1245	52	27	194	5	111	16	167	4	15	6	34	28	8	40	66	186	14	901	18	7	47	127	589	147	0	0	7	0	2	19	1	38	0	44	1	3	76	0	1	3	1	5	7	3	1
Control	mCTRL0037	AAGGCCTTAACACGTCGACC	2636	655	13	89	12	8	3	11	78	0	42	5	277	482	28	12	128	94	2	13	17	7	13	8	9	6	0	3	13	2	1	1	1	6	3	1	0	8	175	2	7	1	25	8	336	1	4
Control	mCTRL0038	ATTCGTGCATCGCGGGGTTT	4297	1099	207	178	144	126	373	60	91	27	221	120	48	247	24	451	38	224	62	30	11	42	59	891	349	244	26	7	802	90	1773	1	29	1737	624	27	19	660	17	2493	222	12	18	25	776	13	2
Control	mCTRL0039	CACCTCGCGTCATATCACTA	4631	1544	51	667	86	154	100	223	320	676	59	44	294	948	114	269	41	401	250	270	103	377	10428	321	103	103	48	9	392	9	17	8	102	36	174	62	48	118	138	32	61	23	672	21	127	12	458
Control	mCTRL0040	GACCTCGCAATTGAGCGCTC	2512	1104	193	71	22	44	78	4	16	5	1163	15	12	45	60	162	553	14	20	3	26	80	59	16	1	63	0	5	9	9	9	2	6	5	2	1	29	6	38	3	0	9	12	6	7	2	6
Control	mCTRL0041	TGTATCCACCGTGACCCGGT	2406	699	67	33	20	20	13	0	64	34	24	2	18	2	43	26	116	2	9	34	3345	4	618	9	1133	29	2	0	4	2	3	0	1	249	16	4	8	3	0	10	0	3	2	100	76	10369	7
Control	mCTRL0042	GATCTTACCACTCGTCGTAG	3589	587	1	18	25	2	11	69	15	45	26	10	33	12	1972	3	123	4	13	20	4	4	32	24	51	0	0	0	0	4	8	0	2	7	3	0	7	2	1	7	4	1	1	10	3	10	0
Control	mCTRL0043	TTCGCCGGCGACGAAGTGCA	3385	1239	1168	1008	2150	28990	834	813	3234	1790	2517	4650	982	2450	1179	1002	2018	1633	2861	5210	4138	1271	2756	2385	783	777	51	282	273	205	540	584	151	1014	392	340	192	3662	163	643	407	304	516	1877	535	243	170
Control	mCTRL0044	AGCACTAGGATCGCGGCCTT	1867	483	5	9	41	0	21	1	67	1	71	1	0	3	18	26	669	16	10	0	7	0	13	5	1	0	0	6	0	0	77	0	0	1	0	0	1	1	2	0	0	1	4	3	5	537	2
Control	mCTRL0045	GCGTATCTACCCTACCGCCG	1383	171	0	0	1	26	34	1	0	1	1	0	1	0	2	9	1	0	28	1	6	0	26	54	4	0	3	0	2	0	0	0	2	0	3	1	0	0	0	0	0	0	0	0	2	0	0
Control	mCTRL0046	GCGCGAGGGCACCGACAAGT	1424	1067	474	3330	772	760	219	34	34	164	1294	541	399	484	2528	6212	278	913	131	359	162	3669	2616	550	1331	115	43	5	22	1467	1359	272	9	55	55	7	181	45	19	42	5	14	53	34	506	9	20
Control	mCTRL0047	CGCGTATATGTCACACGGCA	3316	837	25	599	11	24	90	36	21	15	734	96	71	488	200	96	10	10	17	20	326	33	7	47	1106	18	267	5	1	6	4	15	16	53	52	7	113	24	10	17	7	39	11	9	142	4	24
Control	mCTRL0048	TAAAACCGATCACGATACGA	1171	321	29	3118	16	124	1	78	2	190	1	119	604	771	10365	1921	1979	159	22	88	29	968	273	444	908	1967	2621	1483	77	2301	21	3447	28	1002	14	202	737	7337	22	191	1534	170	9	180	8142	14	61
Control	mCTRL0049	TCCTGCGCGATGACCGTCGG	6466	2062	159	245	794	364	245	77	58	455	447	73	119	322	93	689	108	925	141	138	66	47	105	541	6411	69	1268	33	99	3977	801	284	7672	2973	58	77	383	46	99	156	252	14	27	211	13	17	16
Control	mCTRL0050	TGGCCCACAAGGTGCGATAT	4495	1814	236	1214	189	981	19448	2033	1151	1263	117	108	905	385	700	17229	4129	925	535	185	1164	78	140	1813	42	262	83	19	146	8585	2129	113	130	153	3212	78	153	701	71	106	250	14	871	1025	82	30	225
Control	mCTRL0051	GGGGTAGGCCTAATTACGGA	964	672	4	478	244	27	265	81	173	300	69	25	129	177	206	265	517	133	69	349	106	6630	83	25	2	35	12	2	14	55	24	10	17	32	13261	142	111	10	18	11	6	50	50	19	8	4	16
Control	mCTRL0052	CGCTTCGTCTCTCGCAAACA	2987	950	6	1724	89	190	17	299	18	21	224	14	49	484	149	13	31	30	5	22	33	3	13	11	110	85	19	5	4	3	27	1	4	41	6	17	0	27	9	1	7	0	14	10	6	2	16
Control	mCTRL0053	TTATGTGCCTCTCGGCGCAT	6160	2145	37	117	426	1248	390	62	282	1739	59	157	117	230	346	433	125	309	157	76	65	199	141	552	99	2430	8	215	417	19	21	20	119	279	110	76	43	67	307	27	7	112	532	3916	103	43	109
Control	mCTRL0054	CCGTTCTGACGACGCTAAAG	2116	605	3	12	7	23	46	268	20	0	17	10	1	101	71	44	15	108	7	19	9	28	9	392	12	97	1	0	2	0	8	0	0	18	7	1	4	4	6	2	0	13	17	3	6	1	1
Control	mCTRL0055	AAACTCCCGTGTCAACCGAT	3047	1195	4	725	1007	63	52	2	37	8	82	126	12	7	47	28	28	83	70	11	150	20	12	52	225	329	6	2	47	13	12	7	20	42	40	5	14	103	839	4808	8	32	9	22	4	3	10
Control	mCTRL0056	GTTTGCGAGTCAAAGTACGC	2431	770	8	23	4	17	118	33	265	2	34	8	61	129	7	56	24	32	16	8	8	13	2	8	3	45	1	3	15	38	7	14	1	4	9	3	1	53	2	5	15	5	9	2	4	0	24
Control	mCTRL0057	GGGTGCACACGCCGGCCTAT	1829	801	47	21	0	38	101	25	53	61	29	22	87	4	18	170	149	15	122	5862	26	23	433	85	31	50	158	10	8	1	1	32	2	144	11	32	13	0	2	31	0	2584	0	6	5	115	6
Control	mCTRL0058	CTTTATACCGCGCGTCGGCA	4820	1026	6	36	1	0	268	5	3	264	11	10	3	10	9	7	0	7	6	11	25	8	28	136	1280	316	0	0	2	0	1	664	4	14	139	4	6	5	1	0	0	1	3	38	10	36	33
Control	mCTRL0059	TCAAACGCCCGGGCGCCCCA	3264	1274	1263	400	238	448	326	116	754	279	124	182	485	43	346	217	317	1722	3221	95	457	1335	2107	126	46	425	1567	28	60	250	15	633	6	151	195	109	16	7127	155	70	178	124	229	971	135	15	475
Control	mCTRL0060	GACCGGTGTGTTTACGCGTG	5091	1327	87	120	38	410	248	21	10	79	21	46	923	31	32	267	125	16	40	857	66	384	11	323	352	51	16	0	0	2	7	21	10	8	31	5	8	15	15	7	8	22	6	36	35	7	23
Control	mCTRL0061	CGGTGAGGATCCCTCTTGCG	2095	442	0	76	444	354	1403	22	272	117	44	14	6717	497	221	39	12	159	7	222	196	682	149	47	0	1066	6	0	5	28	3	2	7	7	73	379	532	4	408	7	2	47	9	16	1344	3	85
Control	mCTRL0062	ACGGTCCCAACGAGCGCCGG	2192	565	12	7	55	19	241	0	114	4	39	15	26	51	7	63	43	59	32	4	1	4	119	15	26	21	1	0	2	2	6	0	5	26	10	9	0	0	2	5	19	3	6	8	3	2	3
Control	mCTRL0063	CGCTTCATTGCCCGAACGCT	3857	990	450	275	9	27	44	374	26	200	341	64	77	117	34	7	32	7	217	8	10	23	59	85	5	110	4	0	1	7	1	3	55	1	45	6	66	4	15	3	1	0	4	17	4	2	3
Control	mCTRL0064	TTATACCGTCACGAGTGCCC	7056	2654	303	825	38	271	77	156	174	131	468	760	191	217	38	175	231	147	371	114	1165	83	185	96	3511	246	18	75	110	10	25	184	67	35	140	97	96	18	164	19	92	14	87	30	527	8	242
Control	mCTRL0065	TGCACCGGTACGGGCGACTC	3711	1065	283	190	44	1098	819	244	278	165	232	8	306	96	430	1695	67	49	154	857	311	42	36	720	49	154	139	8	570	362	46	112	26	216	872	28	86	724	1327	154	16	1833	387	4481	19597	101	179
Control	mCTRL0066	GAGGCGTACTTCGGCTCTAA	1017	163	0	0	0	6	0	1	4	6	6	0	68	6	0	4	79	0	1	1	3	0	3	2	0	0	5	0	0	0	0	1	0	0	0	0	0	0	10	0	0	11	199	0	2	1	20
Control	mCTRL0067	TTCGAGACGGATACGTCTGC	4403	2401	456	569	9673	227	553	104	2256	1167	809	215	893	1109	129	1875	2270	167	262	66	86	505	476	187	56	341	37	13	61	53	17	11	333	66	50	9	34	11	92	14	8	5	39	44	14	9	512
Control	mCTRL0068	TAGCCCGTCGAGTACTCCCC	7376	2592	1495	2309	742	931	3569	2517	2624	4565	12565	3486	3904	2536	2953	1739	6055	1521	2239	1272	2170	4992	1469	4035	1595	3867	197	39	538	157	37	441	245	162	362	196	107	222	79	138	976	228	376	1433	90	142	2087
Control	mCTRL0069	AGCTTAGATCGTGCGTCGTA	2984	823	56	54	41	13	623	8	41	13	4	24	419	103	225	10	44	13	26	5	207	9	232	11	7	62	16	2	3	1	3	0	92	5	49	8	188	5	30	35	2	6	55	8	11	1	9
Control	mCTRL0070	CGCCGGATGACTGGTGGATA	2628	647	118	94	23	59	63	41	181	7	293	83	124	42	38	226	10	35	63	115	26	78	10	14	372	18	59	5	8	1	8	3824	8	2	65	41	21	985	28	10	17	165	0	20	17	8	6
Control	mCTRL0071	CCGTTTCGCCTATTGGTGCG	4773	1707	289	2275	480	294	855	156	426	133	356	443	243	720	131	2614	316	526	522	63	65	68	185	1235	431	464	280	800	24	1028	39	52	463	275	1006	46	983	127	38	6019	1102	103	357	53	6	33	626
Control	mCTRL0072	TTCGACGTGCGGCGTATTGG	7551	1965	13	105	10	57	76	194	804	10	211	19	92	61	21	100	65	13	28	20	119	24	176	220	28	18	24	96	73	5	10	5	6	9	55	106	3	1	38	57	5	3	22	32	16	260	15
Control	mCTRL0073	TTCAATTGTTCGCCCGAACA	2646	876	283	9	88	13	51	94	16	14	20	7	9	10	12	259	17	46	131	23	195	26	15	920	486	33	20	1	11	1	10	1930	14	14	25	6	669	2	2	20	4	78	20	1556	3	0	1
Control	mCTRL0074	GCGGATCTGACGGTTACTTA	1805	1154	3285	3123	192	228	155	438	4066	6118	2884	924	20389	26600	11284	4787	1842	611	2038	1983	3720	218	3096	552	12108	2899	149	10	195	1333	257	85	182	60	275	207	14	205	161	365	14	3	53	41	7	7	404
Control	mCTRL0075	AATGAAGCACCGATTGCGGA	1115	249	6	0	8	1	0	5	2	0	5	2	2	5	2	0	6	0	4	2	11	4	19	0	0	4	9	0	4	0	1	0	0	1	0	0	9	0	0	2	0	2	0	1	0	0	2
Control	mCTRL0076	TCCTATAATTGAGCGAACGG	2052	566	22	14	7	12	4	194	11	0	260	25	8	13	3	414	34	4	9	2	15	16	6	20	3130	0	2	10	0	0	0	0	0	3	8	2	1	1	0	0	1	4	2	2	5	120	5
Control	mCTRL0077	GCTACAGATTTGCGTTCGAG	2647	417	16	17	0	26	5	18	0	3	34	180	1	0	0	37	2	0	11	1	4	4	6	2	14	5	2	0	2	2	5	10	3	0	6	0	0	0	0	1	0	3	0	3	7	0	0
Control	mCTRL0078	GGACTGAAACCGATAGTATC	920	161	7	813	3	174	7	0	6	0	0	0	0	0	2	3	1	77	0	21	4	3	0	6	7	3	0	1	0	1	0	24	0	17	0	0	0	0	0	98	5	1	3	4	395	0	0
Control	mCTRL0079	GCAATTCTGCAACGCACGTC	3458	909	568	202	385	80	936	318	520	211	216	312	58	228	9	139	1322	667	627	217	1501	8015	443	117	3588	486	17	18	66	74	295	128	40	54	8	82	8	21	11	29	2013	34	15	372	470	11	3
Control	mCTRL0080	CACCCGACTCGGCCGTAAAG	2257	628	2	223	636	137	25	31	6	11	48	12	83	13	17	39	195	16	33	6	38	17	17	1781	9	16	0	6	92	7	8	3	4	5	3	4	1	8	7	8	0	0	7	6	3	6	11
Control	mCTRL0081	CAACCGTGCGATGCGCGCTA	4543	1977	105	90	129	362	179	48	48	11	24	24	75	26	157	163	123	138	92	1174	15	122	221	412	41	83	4	61	4	41	8	69	16	29	54	11	0	294	78	10	22	34	65	31	39	6	36
Control	mCTRL0082	TGATGGACGCGATACGTTTA	4187	1251	31	28	26	38	229	80	16	31	33	5	10	458	84	14	51	33	20	14	220	10	65	212	66	18	7	5	4	113	27	2	10	3	16	9	88	275	12	20	27	5	11	30	94	4	77
Control	mCTRL0083	TACCCCTTGAGGGGCGCATA	3649	1127	15	31	1481	2783	61	96	646	61	267	61	7	20	153	2101	37	808	189	523	6	116	20	28	29	2	0	52	1	0	5	27	16	1	6	22	0	64	4	9	15	24	6	3	13	3	154
Control	mCTRL0084	CCGTATACGTATCTATGCCG	3545	1098	15	2131	68	105	16	99	464	121	74	97	147	72	2	14	42	296	1097	54	199	28	52	384	22	103	4	27	2817	8	5	60	6	3286	49	15	24	89	15	8	0	19	2	60	8	3	14
Control	mCTRL0085	ACAGCGGCCTAATACTTCGC	3584	1201	6	297	157	2	17	803	12	11	3	14	49	9	185	9	31	167	89	104	104	16	3	61	74	157	4	0	0	5	2	51	13	20	25	1	10	1	29	8	1	5	1	1	4	14	12
Control	mCTRL0086	TATCGAACTGCACACGCAAC	4840	2460	11454	13169	14325	25995	61460	14960	25109	5301	18793	11529	16071	9501	13692	7109	4446	4692	14109	12449	17030	17807	5348	24799	4376	14328	91372	106922	69190	11549	61163	17310	66874	35194	90655	89128	68866	107141	40043	80156	60228	91526	52431	43518	44799	66567	99343
Control	mCTRL0087	TGTCGGACCCATTGTCGAAC	4062	1338	41	1608	11098	34	297	19	170	91	8	249	243	82	32	133	11	40	1025	299	36	39	39	8	57	109	3	5	26	55	14	67	41	119	206	14	19	8431	25	35	1	83	8	676	3	2	13
Control	mCTRL0088	AAACCTAGCGTAGATTCGGC	1283	201	0	1	37	0	16	0	2	4	2	11	2	0	1	2	2	2	3	2	0	1	0	5	0	4	3	0	0	0	2	46	0	23	0	6	0	0	1	0	0	7	0	0	1	0	0
Control	mCTRL0089	TAGATGGTGCTTCTGTCGCG	5981	2129	835	252	6388	361	756	6429	1591	27383	186	4598	911	9134	392	4627	1052	114	4962	781	830	12020	2777	2051	3049	389	431	68	447	17928	883	34	195	1024	898	2240	1024	2669	34	838	8	500	78	8828	349	5172	79
Control	mCTRL0090	CATCGTAACACACGTACGAG	2154	1027	132	55	62	65	122	93	119	339	12	1027	9756	18	14	442	16	802	104	3243	35	147	21	130	18	215	329	33	256	41915	33	47	14	83	9	50	108	37	6	8	2	1	19	19	1444	19	3
Control	mCTRL0091	CAACGATCAGGCGTGTTATC	2640	1507	280	1038	1244	148	1507	680	2182	533	3182	191	2859	2415	1427	285	5309	589	197	1276	235	134	337	771	152	2584	73	120	9848	1840	24	244	222	317	317	1050	1625	321	19	158	136	196	85	1110	31	56	24
Control	mCTRL0092	ACAGCAGGGGCCGCGAATAA	1448	458	5	1	94	3	57	20	6	4	148	6	15	15	63	171	24	6	15	1	20	3	36	6	122	12	2	0	1	1	0	1	5	2	6	0	10	1	25	1	8	14	12	5	11	2	2
Control	mCTRL0093	AGCCGGGCTTTCCGTCAAGC	1714	509	224	32	1	39	2	25	2	0	11	33	5	15	149	410	7	17	5	5	3	16	44	40	42	16	12677	141	12	14	3133	28262	1646	30	98	11	6	97	424	720	4788	296	535	12	8	164	13
Control	mCTRL0094	ACGGTCCCTCTCGGGTCAAT	5441	2545	551	41	88	388	206	39	77	279	697	50	276	20	91	116	624	8501	77	133	146	70	205	85	19	463	14605	202	274	114	14	265	27	37	650	73	47	166	43	12	1535	10	580	11	19	45	21
Control	mCTRL0095	TCAATAGTTCTGCGCGAATT	3423	514	1	6	1	14	1	112	118	1	2	2	0	15	3	2	1	5	3	5	2	25	1	16	5	0	8	3	1	51	12	0	2	0	2	2	0	1	0	3	31	9	169	3	1	2	11
Control	mCTRL0096	TCGTTACATACCCCGCGGAA	3141	892	10	134	17	21	23	22	7	1	70	12	9	15	9	253	13	10	7	6	18	5	51	13	120	9	0	2	43	0	2	1	3	8	10	6	6	4	21	0	111	0	3	14	11	15	2
Control	mCTRL0097	CATTCGGTCCGTTCATCTCG	6649	2431	425	679	597	1853	665	57	423	45	774	227	399	148	349	179	351	620	267	198	162	106	121	1944	109	33	35	36	323	33	31	54	43	367	273	38	14	52	164	548	115	69	292	39	99	103	385
Control	mCTRL0098	TTCGGCTCAATGGCGCGAGC	3118	819	9	0	54	52	0	6	0	2	8	10	16	653	185	15	56	0	5	17	6	4	31	124	3	43	30	0	0	7	2	10	2	22	3	4	1	4	6	4	2	4568	1	3	3	0	0
Control	mCTRL0099	CATACCCGCGCCGTGACTCC	6526	2086	198	310	139	340	160	19	120	1164	145	13	149	2643	1907	442	111	340	19	605	226	209	1140	92	1654	727	19	38	109	44	9	201	9	32	140	7	125	24	11	19	6	6	44	29	91	16	16
Control	mCTRL0100	GGACGGATGGGACGACTAGT	1399	578	62	120	528	116	7	50	36	4	1199	205	67	118	182	23	25	9	268	139	0	8	19	122	6	16	2	2	4	2	166	241	2	60	1	5	3	10	1	0	100	0	15	6	12	5	10
Control	mCTRL0101	GTGCAACGACTGACCCGCGG	2399	794	14	308	22	4063	44	3	13	431	52	28	54	33	1	7	91	33	113	381	137	20	1404	58	2359	537	6	489	4	3	10	4	0	3	19	2	4	5	1	4	0	42	5	2	20	1	27
Control	mCTRL0102	CGACACTTGGGCTGACGCGC	3384	1601	41	35	182	223	113	328	578	53	622	54	1421	277	672	441	218	114	74	28	254	127	562	458	113	65	16	16	24	41	1	13	4	30	239	10	2137	19	17	5	65	9	183	26	13	4	14
Control	mCTRL0103	TGTGTAATTACGTTTCGCGG	4373	1199	330	13	64	401	13	455	75	7524	2018	18	111	147	108	54	2286	72	8	11	23	42	142	4068	19	59	43	9	1	17	0	2	627	7	6	68	118	1	12	3	20	8	8	47	14	26	6
Control	mCTRL0104	AACCGTACTGCGAGGAGCAT	2377	1023	35	182	135	106	1102	34	94	7	129	70	102	27	149	13	8	77	27	38	266	95	44	50	369	14	2	2	84	53	5	2	3	79	295	37	5	35	70	5	18	4	29	13	2	7	38
Control	mCTRL0105	GATATTTACCGGCGATAAGA	836	100	1	1	1	7	19	3	4	1	4	0	5	18	5	16	3	0	0	13	2	19	0	1	32	110	0	0	0	0	0	1	2	0	0	1	6	2	10	5	4	0	0	1	39	0	0
Control	mCTRL0106	GCGACGTGTATCGATCACTC	4021	1145	5	24	33	76	18	4	63	17	7	24	3	11	12	11	10	92	9	17	10	4	161	21	1816	132	10	33	81	10	8	0	0	2	27	37	3	3	5	303	35	8	22	5	4	3	8
Control	mCTRL0107	TAATGGAAGATGCGCGATAC	3459	713	37	3	21	5	160	3	4	6	0	32	2	1	3	4	35	46	6	26	72	8	18	8	21	1	1	0	0	1	33	6	0	0	3	1	2	34	1	1	4	1	4	8	2	1	0
Control	mCTRL0108	TGTCCTACCGAATGAACCGT	4354	1725	372	992	1798	607	1629	988	843	218	775	370	2166	352	217	1980	5530	5271	3845	2031	1318	1387	942	2421	335	380	62	318	186	679	2271	24	63	420	137	3305	50	410	462	2088	4184	55	37	203	153	205	376
Control	mCTRL0109	ACGCGAAGTGTCGCAGAGTG	2460	738	4	30	147	122	23	30	4	21	66	5	72	11	25	21	2	1	38	65	38	15	15	23	2	197	0	0	4	30	1	9	2	2	7	2	0	2	53	2	0	1	4	6	4	0	0
Control	mCTRL0110	GCAGAGCGTAATCGGCATCG	3761	1012	328	35	61	480	7360	37	651	22	503	736	1110	5606	108	94	74	97	46	38	20	90	519	76	54	218	5360	81	14	147	33	31	2	11	55	28	10317	170	6	343	8	29	34	127	12	14	18
Control	mCTRL0111	GCCGCGCCATAATATGCCAT	4976	1488	123	277	407	591	2410	2179	457	182	3170	190	470	375	540	797	726	2236	164	460	723	60	779	1011	533	3051	142	153	2518	123	2014	25	1128	35	428	30	490	98	22295	886	487	139	989	19	14	135	55
Control	mCTRL0112	CGAATGCGCCGGAGAATATT	1750	405	4	1	9	150	0	2	17	2	139	3	8	0	5	0	14	16	14	4	4	2	1	8	2	1	0	1	1	0	0	0	1	2	4	0	5	0	0	1	0	0	3	0	5	0	1
Control	mCTRL0113	CCCGCCTGGCGATTCACGGG	3206	1501	156	415	9	211	189	57	195	34	659	155	284	74	146	60	1141	95	56	658	630	18	145	59	41	1500	107	61	21	46	25	17	3	84	10	592	156	4	5	1	5	0	18	18	59	1	3
Control	mCTRL0114	AGCCTAGTCGCGCTAATATT	2908	964	8	13	78	255	24	56	65	7	84	69	15	97	126	913	22	35	23	13	15	12	67	8	214	40	6	7	53	5371	4	8	11	28	9	5	0	134	1	63	1	9	11	9	7	3	5
Control	mCTRL0115	GTGTGCCTCGACAGCGTAAG	1980	923	1043	582	106	4772	103	170	963	452	673	190	1380	283	18316	5020	322	368	457	2444	1157	43	350	1029	34	552	763	57	1756	1161	194	569	406	855	2695	56	245	3019	3132	428	137	5156	1843	11157	47629	274	417
Control	mCTRL0116	TCATGCGCCTCGTAATACCT	6970	2230	20	83	32	1475	98	104	3186	148	502	821	1273	1836	114	317	51	145	242	105	9625	144	215	409	180	4753	830	33	10	17	12	958	15	1472	1097	33	17	14	84	23	11	17	45	36	36	7	17
Control	mCTRL0117	TGTGCCACGCCGCTGCAACG	4250	2388	188	276	169	214	506	68	2703	74	286	46	61	117	2015	93	68	499	199	43	36	101	292	672	673	179	204	6	8	8	5	98	356	18	327	42	3	31	4	2	131	7	15	141	31	41	272
Control	mCTRL0118	GCAAATAGGTCGGAGCGTGT	2612	1044	176	407	67	51	147	108	144	35	358	63	34	19	123	390	30	276	188	102	15	146	105	107	36	1552	0	6	38	8	3	4	2	0	115	5	92	6	61	3	2	7	9	13	3	1	3
Control	mCTRL0119	GGATAGCCCGGTTGGTGCGT	2068	985	110	322	486	4881	161	574	1252	1843	19896	1415	5473	8002	934	73	917	35	230	39	2319	118	61	13	475	2200	89	528	69	330	13	87	186	124	66	257	5290	615	76	208	7	5	332	4076	10	5	870
Control	mCTRL0120	TCGCAAAATGCGGATTCCGT	3903	1246	20	123	229	14	43	33	24	9	30	44	382	467	13	4	94	41	75	229	76	23	38	11	109	27	3	0	32	4	0	5	2	19	49	3	62	89	32	1	18	887	143	3	7	17	468
Control	mCTRL0121	GGTGCAGTCCGTTTAGTCGG	3598	1081	95	0	29	20	127	38	61	203	36	7	56	773	32	78	169	15	5	47	10	8	380	103	58	83	1	6	4	4	9	4	167	12	8	306	10	7	101	31	0	0	6	12	42	1	4
Control	mCTRL0122	TGGGTTCCGGCCCCATGTAC	5216	1579	129	553	99	793	339	162	935	570	15124	8706	8270	14789	3922	25705	10052	7063	3684	8513	5648	7553	3748	2732	1035	3753	824	1128	840	896	152	594	47	5173	4785	11400	2749	6888	1007	12859	18186	2248	214	198	893	2613	5172
Control	mCTRL0123	CCTTCGGATTCGTAGGCTGG	2784	1426	41	1560	33	123	20	2	40	17	114	20	4	21	1	16	170	23	8	47	8	154	36	2264	26	146	35	33	3842	72	0	11	5	10	96	1	27	27	10	18	4806	17	3	8	8	27	52
Control	mCTRL0124	TCCCCCGTACGTGTATGTCG	8534	2912	78	347	590	2562	996	143	3000	857	283	1413	725	1118	4007	1588	1765	475	96	1869	47	210	117	3601	218	1544	1316	20	11	66	64	40	24	1610	109	25	51	42	47	39	17	79	52	83	11	17	824
Control	mCTRL0125	AGGTGCGTGTCAACCGGTAG	2129	489	32	36	9	32	57	17	2	1	4	2	13	28	1884	5	19	21	9	76	4	1	1	16	1	2	0	0	55	0	3	9	5308	9	5	1	0	1	32	4	0	1	2	3	2	8	2
Control	mCTRL0126	AAAAAGTCCGCGATTACGTC	2367	670	3	36	4	1	136	16	28	10	18	773	122	13	2	18	36	5	255	24	936	5	8	15	31	63	167	2	4	2	5	1	1	2	11	0	0	3	13	26	1	4	5	7	4	2	7
Control	mCTRL0127	TTATCGCACAACCCCGAAAG	2092	724	17	104	5	242	3083	6	38	6	2855	5	23	169	1067	315	44	361	72	78	300	9	330	287	54	62	39	1	5	83	36	23	8	18	40	5	106	2	4	14	641	50	3	33	1408	10	10
Control	mCTRL0128	CACCCCGTAGCAACGATAAA	1471	690	1060	1091	257	3832	409	178	283	2051	1031	1359	2484	116	157	111	291	1391	163	302	144	801	92	231	86	480	83	283	98	39	115	333	171	68	71	43	104	1753	97	48	227	31	645	203	49	478	998
Control	mCTRL0129	TAACAGCTTCCGCGTAATAT	3390	982	224	45	704	387	77	109	35	119	172	63	104	616	231	487	754	258	110	380	62	149	102	72	35	3006	169	6	176	116	44	61	5	38	186	129	13	26	10	18	6	640	48	85	12	22	92
Control	mCTRL0130	GCCATAGCCAATCGCTAGTT	3553	1579	47	301	5499	53	99	186	61	186	38	680	172	58	8	103	1280	2162	138	4583	25	348	35	132	125	49	267	7	2	114	241	798	383	102	9	6	50	8	809	500	3	44	32	368	210	66	11
Control	mCTRL0131	CATCTATGAGACGTGCGTAC	3450	822	11	222	43	747	25	5	5	32	29	33	9	11	10	2	2	13	53	65	333	81	79	18	3	53	8	0	7	0	1	4	0	10	2	5	92	10	2	2	0	11	937	7	38	2	21
Control	mCTRL0132	TTGATAAACCGCGGCCGAAA	1201	372	36	4	0	12	25	7	8	11	0	27	38	30	4	2	15	8	87	46	47	236	6	11	4	127	1	0	0	13	7	1	0	31	0	1	12	0	1	0	0	21	1	521	0	0	8
Control	mCTRL0133	GTATCCTCGCAATCGTTAGG	2539	628	6	25	142	6	1092	20	506	46	148	76	6121	563	76	747	10	2	127	89	36	940	9	305	0	37	4	1	549	52	5	11	5	24	0	5	23	1	42	11	233	0	2	9	3	2	0
Control	mCTRL0134	TGGCGCTCCTGCGCACACGA	1641	547	12	35	63	12	9	34	272	8	10	7	218	34	132	639	1151	6	12	19	143	18	3	2	4	122	8	0	0	6	4	2	0	0	27	8	1	0	0	0	0	1	4	9	2	0	0
Control	mCTRL0135	TTCGAAGTCTAACCCGCGGG	2422	378	0	33	1	291	5	26	4	9	1	4	4	0	11	14	5	0	12	0	3	25	6	3	2	1	3	0	0	0	0	0	0	0	0	0	0	10	0	7	0	0	4	6	1	0	4
Control	mCTRL0136	GTTTCCCGGGACTGTCGCGT	4828	1153	5	10	26	28	23	78	27	21	216	32	152	8	106	28	819	25	351	121	51	46	127	9	78	27	2	0	3	62	20	12	2	3	44	8	6	21	21	4	8	8	0	19	4	5	24
Control	mCTRL0137	AACGCCCCGGATTTCGTTGA	2613	869	19	405	272	209	179	881	169	57	16	11	222	32	76	151	487	54	57	94	55	232	122	172	367	78	8	5	45	267	49	51	2	13	45	7	129	21	163	8	23	4	857	33	35	8	91
Control	mCTRL0138	ACAACACGCCGACACGTCTA	2792	511	16	9	11	9	5	0	33	1	6	28	2478	6	9	137	5	23	6	9	15	2	18	368	17	11	2	0	2	0	1	23	0	1	8	2	0	1	1	9	0	5	5	3	5	5	6
Control	mCTRL0139	TAAGCGGCGTCATGTCGCCC	5108	1907	28	30	769	564	260	23	37	415	712	128	1489	90	615	1841	51	226	217	1748	58	534	166	320	1614	39	16	18	38	22	95	40	1	124	21	41	39	24	204	12	5	24	96	20	33	5	25
Control	mCTRL0140	CCGCCCCTGCGAACTGCGTT	4928	1707	104	83	365	388	754	185	91	81	2368	210	340	815	345	81	87	206	362	19	108	436	109	263	252	115	85	26	3	40	18	14	50	464	153	20	41	5	204	151	476	50	166	328	14	6	47
Control	mCTRL0141	TATCTAATCGCGGAGTCGTA	3241	698	2	0	25	107	106	54	23	4	7	5	42	9	27	173	7	7	4	90	145	3	8	44	4	18	8	28	1	0	2	0	4	6	5	1	16	2	4	5	9	1	8	21	5	2	0
Control	mCTRL0142	ACGCTATAGTGTACGTCTAA	1958	1258	1061	2883	7882	5433	5080	4585	6063	1265	13126	1541	1132	716	14396	3516	1219	2167	5500	2416	1136	2118	2464	265	3736	8301	9052	6628	2453	2780	4319	11864	18374	855	4803	1000	597	3462	1373	571	280	6777	11782	1898	5389	754	5479
Control	mCTRL0143	GTAGACATATTGCGTAATCG	2203	392	9	343	67	107	71	17	126	32	37	385	24	66	4	472	106	36	69	156	34	47	43	59	104	233	26	0	166	5	0	0	3	6	28	3	11	8	18	31	11	0	3	45	2	9	15
Control	mCTRL0144	CGTAAACCATAACGTTGGTC	2136	473	3	3	4	0	11	1	1	148	17	20	8	5	6	7	1	3	0	19	32	169	13	5	130	5	1	1	54	2	0	0	21	0	0	2	0	0	0	1	0	0	0	9	51	0	0
Control	mCTRL0145	GGACGTAGATTAGGGCGTAA	1813	499	215	2477	347	6653	44	225	54	179	352	89	6079	543	2741	33	999	2427	23	310	8276	833	155	1375	93	5730	73	47	3812	326	909	778	10	163	1150	51	35	1069	16	1707	5	70	125	1167	96	5	9
Control	mCTRL0146	CGGGCAATATGATCGTAGGC	1709	843	153	177	1	26	6	13	14	11	40	26	20	14	78	127	24	32	1	15	535	38	10	40	81	22	3	0	26	3	117	6	2	7	215	64	6	0	1	3	5	10	7	15	5	1	8
Control	mCTRL0147	GGACCAATGTTACCGTAGGT	1378	462	1	17	0	1	4	4	1	3	3	0	58	9	1	8	0	8	4	5	385	7	1	2	55	3	0	0	0	0	0	0	2	4	2	0	0	1	4	1	0	1	2	39	2	0	0
Control	mCTRL0148	CAGGGACGTAGCCGCCGTTA	3272	920	5	10	14	45	20	270	39	3	14	11	4	9	5	186	12	2	56	15	10	4	8	3	3	84	1	4	2	2	0	10	11	9	22	2	5	2	26	18	17	1	10	4	3	1	2
Control	mCTRL0149	AACCCCGGCTGTCATCGCCG	5052	1332	1196	110	291	6488	133	24	124	1784	34	1489	116	390	105	169	3426	300	67	1029	22	16	63	306	19	607	133	14467	148	63	1895	449	483	67	4868	135	16	139	6	36	6	3	161	14730	77	6508	26
Control	mCTRL0150	GATTCATTATCGGCATACGG	2724	549	4	3	4	11	0	11	1	1	3	2	42	0	2	1	4	7	40	42	9	5	2	2	1	0	1	3	2	0	0	2	0	1	0	1	1	3	0	0	0	0	3	15	2	2	2
Control	mCTRL0151	AGTCATCCTCTATGCGCGTA	3161	629	22	16	347	153	314	1	13	14	60	39	10	8	47	18	829	119	29	4	192	11	76	22	212	110	4	1	4	6	1	454	3	15	485	55	0	2	3	8	1	2	20	11	15	1	3
Control	mCTRL0152	CGTACGGGCGCGCCGTCCAT	5015	2022	131	330	341	451	915	458	425	206	1679	246	380	402	385	535	240	142	492	182	930	69040	148	4727	4220	1505	46	55	398	19	326	22	83	1487	146	81	56	52	95	313	8517	116	760	74	35	223	163
Control	mCTRL0153	TTGCGTGTGCGTTGTTAACG	5463	2241	24	83	1299	335	264	50	3520	70	346	412	107	1287	2121	241	246	113	331	72	95	21	84	254	2108	500	7	8	39	11	24	81	19	408	166	10	80	179	11	41	6	14	171	17	12	12	38
Control	mCTRL0154	GACCATACGCCTCGTATGCC	4143	1800	82	3438	409	1318	478	267	211	353	3117	154	536	24206	122	292	904	29	44	254	1393	30377	6781	2203	93	803	29	25	46	95	10	40	21	252	35	16	42	34	53	9	16	3	59	16	12	27	227
Control	mCTRL0155	CGGCAATGTGTGGCGACCGC	4758	2126	132	262	330	1084	379	234	430	134	570	4	1971	79	181	490	134	102	372	192	210	98	246	510	312	255	106	4	25	825	187	365	28	120	269	4	154	49	186	1013	626	19	16	68	53	55	1436
Control	mCTRL0156	TCGCTAAGCCGGGTAATACT	3099	1322	41	839	351	326	2266	35	25	47	31	78	87	129	629	234	198	75	113	61	35	72	32	999	7	48	63	1	18	18	10	3	10	133	468	9	62	9	29	28	33	135	19	7	180	17	68
Control	mCTRL0157	TTTCTAATTACCCGATACGT	3501	1109	243	128	2464	282	895	228	289	177	3962	818	4163	977	1464	642	319	124	153	380	4356	293	842	650	426	195	108	18	37	47	34	163	104	68	365	247	106	472	92	16	7	231	64	101	198	99	17
Control	mCTRL0158	ACCAGGACTGCCGCGTGAGG	2350	963	45	2508	464	695	953	251	88	238	1765	52	295	8276	26	122	657	18	44	139	1169	577	6173	1541	58	180	25	1	21	17	5	1	5	2	7	18	57	9	4	1	0	1	29	6	14	5	10
Control	mCTRL0159	GCGCGTACATATAAATAGGT	931	479	169	95	2605	611	1047	192	335	122	4269	845	4299	842	1360	636	315	112	154	340	4208	261	870	614	404	181	108	20	37	73	32	65	98	69	270	221	86	573	98	19	10	270	80	70	232	92	4
Control	mCTRL0160	CTTATCCATAATAGGCGGCG	1337	176	6	16	0	63	0	1	0	0	0	0	2	0	0	3	0	0	0	3	4	2	4	1	1	9	0	0	0	0	0	0	1	38	22	0	1	0	0	0	0	0	0	2	0	0	0
Control	mCTRL0161	GTTATTGCGCCTTGGCCGTA	4999	1238	19	34	58	56	2513	21	210	11	297	11	2936	31	69	6	109	13	26	158	13	32	22	30	60	15	0	2	7	2	38	1	3	1	80	2	5	26	3	30	83	15	18	12	73	524	8
Control	mCTRL0162	TAAAAGTGGTGCGTCGTCGT	2632	1097	74	196	1564	944	144	208	691	64	705	155	113	74	939	79	321	258	115	492	226	273	262	367	1017	148	9	4	50	237	23	32	15	30	68	44	36	19	74	43	119	30	33	95	30	156	136
Control	mCTRL0163	CTCGTGAAACAAGATCCGAC	1315	440	4	29	18	8	0	0	0	287	4	6	1	10	77	2	4	9	36	2	9	461	22	13	0	4	0	1	0	0	1	3	0	12	10	0	1	0	1	0	0	0	7	7	2	1	0
Control	mCTRL0164	TAAACGATTCACCGATAACA	1695	236	4	8	6	6	5	3	3	0	6	3	1	23	15	0	54	0	20	3	2	36	13	42	16	95	0	0	0	2	0	3	0	0	16	18	1	12	0	0	0	0	2	3	3	0	3
Control	mCTRL0165	CGGCCGTAGTGACGAATGGA	2228	703	20	35	46	233	156	5	19	3	43	67	38	439	266	60	94	140	53	289	37	37	137	120	248	30	49	33	8	3	1	90	0	2	12	1	1	1	0	0	13	221	7	18	6	0	54
Control	mCTRL0166	ACCGGTCGAAGTCTGGGATT	3527	1382	35	56	290	31628	1507	12	31	171	21	75	29	195	22	177	35	41	87	38	95	56	32	74	68	547	16	14	77	20	25	36	23	304	59	16	107	27	46	298	213	75	191	53	42	216	194
Control	mCTRL0167	TCCGTACATCGACCTATTAC	6562	2866	200	4074	323	8228	4411	5774	1722	12485	780	2454	5065	18591	229	728	9612	847	13311	5060	6003	1368	3675	6354	221	3901	157	100	5302	1021	203	456	382	772	1137	201	4680	2529	6439	112	955	1780	166	131	590	101	5102
Control	mCTRL0168	CGACACGATGGTCATACTAC	2592	1102	50	1546	403	128	37841	379	134	64	522	50	87	61	4242	1820	1507	644	377	1416	2109	201	82	334	2774	99	374	41	65	128	60	160	167	681	28	8	27	9732	247	84	267	582	304	413	218	400	1576
Control	mCTRL0169	ACTCGACCTAACGTCGATGT	2315	957	75	100	34	283	24	71	10	19	33	5	146	133	962	148	136	453	30	31	72	12	20	278	11	134	0	1	3	41	1	8	6	3	4	2	87	30	6	14	3	5	19	9	2	2	13
Control	mCTRL0170	TGCAGATCGCGAAGCGACTA	1279	336	5	1	291	34	89	7	9	20	2398	0	625	15	3	7	37	3260	8	1	44	93	14	1	33	3	2	0	7	4	0	2	0	6	0	2	1	0	0	2	13	1	2	3	3	1	11
Control	mCTRL0171	TCTAGGATACTCTTAACGGG	1021	325	26	11	25	3588	7	3	182	4	24	97	2	7	11	6	0	2	24	5	1	0	9	1	8	0	0	0	0	0	10	1	0	4	0	0	0	21	0	0	0	3	3	4	578	0	0
Control	mCTRL0172	GGTCTGTCCGTTGCGACCAC	5220	2184	69	122	362	225	48	309	58	23	1507	155	531	328	86	236	206	187	125	96	246	30	72	108	182	64	32	1	30	668	18	132	24	32	3820	882	54	10	578	112	167	588	18	96	137	20	34
Control	mCTRL0173	ACCGGACTGCGATATGCCGT	3633	1259	4	92	144	49	248	11	124	19	11	24	29	110	225	19	7	116	42	17	16	9	59	25	80	240	8	9	339	17	1	3	4	5	3	3	10	12	7	5	9	2	3	13	5	0	7
Control	mCTRL0174	CTCGTATAGTATTGCGTGGT	3327	1111	80	115	33	113	25	21	46	15	18	12	4	455	41	28	84	5	7	27	16	36	411	18	6	49	0	0	1	1	34	3	3	4	4	0	6	35	45	31	2	5	4	8	12	9	5
Control	mCTRL0175	CTTTAGTCACGATATACGTC	3486	881	0	1	11	28	156	6	8	7	11	59	46	12	0	40	43	164	10	7	56	16	52	8	29	27	1	0	0	0	0	0	31	2	9	0	1	3	43	6	0	0	9	5	5	2	8
Control	mCTRL0176	GCGGCCCGTGACCGTTCAAT	3930	1539	20	64	43	445	93	556	163	165	49	274	31	345	97	36	106	166	612	66	33	104	329	280	101	258	26	2	49	14	13	49	27	175	37	13	51	3	133	10	7	1	4	6	17	4	8
Control	mCTRL0177	CCGGTTTATAAATTACGTGG	1718	397	7	2	4	1	43	1	2	7	0	1	35	7	0	3	3	248	0	3	3	3	6	1	66	26	18	0	0	0	1	1	4	1	6	0	0	0	0	0	3	2	2	8	3	0	19
Control	mCTRL0178	CAGCTCACCCTGCGTACGGT	2165	1006	4	19	39	201	110	6	17	3	40	24	29	22	110	8	175	8	46	10	22	1	42	36	75	51	0	3	4	2	9	2	13	5	0	4	2	5	1	15	0	11	0	7	5	3	1496
Control	mCTRL0179	CTCGGCTTTACGATCGATCA	4090	1541	21	132	86	592	106	1882	82	670	87	19	65	42	158	644	316	13	32	3546	33	92	276	291	37	51	1	0	31	8	64	15	808	13	41	1	2	69	95	5	0	7	8	16	139	9	523
Control	mCTRL0180	TCTGCACCGCGACTTAGCTT	3629	785	6	1	14	27	24	6	0	2	7	3	30	35	3	0	174	20	55	967	25580	64	12	142	231	136	409	1	3	2	1	10	1	5	14	1	4	5	2	66	7	1	3	39	15	2	9
Control	mCTRL0181	GGCTTATAGACGAGACTCGA	1573	403	14	46	6	34	78	1	5	555	52	63	14	37	20	320	21	150	19	19	319	128	1	1	113	24	0	2	0	0	0	4	2	31	51	3	2	2	10	0	0	11	5	8	3	0	1
Control	mCTRL0182	ACCGGATGTGGGCGCCTCTC	3987	2220	2042	632	300	174	1237	41	379	268	100	69	98	208	1030	474	586	88	3565	843	624	69	1752	166	551	304	152	3109	72	225	15	603	35	212	45	17	6	285	558	1935	167	50	70	200	57	18	39
Control	mCTRL0183	CATTACGTGTCGAGCTCCGG	4868	1156	364	40	150	137	55	12	15	6	133	1373	32	67	41	21	289	133	397	59	58	21	328	12714	116	855	1307	13	28	33	619	1342	272	4818	238	1	15	21	4	22	4	323	197	15	44	29	1
Control	mCTRL0184	GATGCGGGTGGAAAACGTTA	1075	324	2	342	13	17	102	0	2	20	0	3	1409	1	0	7	0	2	62	3	2	4	79	6	48	2	1	1	2	1	2	0	0	4	10	1	3	0	15	2	0	0	5	2	4	0	2
Control	mCTRL0185	GCAAAAAGCGGACACGCGAC	1738	490	2	82	20	46	39	65	25	5	26	21	135	0	0	3	2	3	8	18	4	12	7	5	6	65	0	1	0	0	0	0	13	4	14	0	0	1	0	0	2	0	7	11	2	6	4
Control	mCTRL0186	CGAGGATGTACATACGTAAA	1597	429	17	1097	869	72	138	75	15	22	4	73	207	19	27	132	4	6	193	41	13	45	14	241	45	3	6	27	5090	13	0	8	5	5	252	40	26	16	173	56	23	353	3600	5	5	141	10
Control	mCTRL0187	ACACGTCTTCGGCTATACGC	6379	2946	690	1154	6451	3043	1810	1805	3886	2235	5545	1026	972	3134	3782	1982	5293	2873	1540	4318	1490	4374	978	4759	2941	1871	1150	7273	6234	232	177	545	955	786	1210	287	845	889	5316	1378	90	135	1455	1050	2078	287	1041
Control	mCTRL0188	TCGTGCCTAGCTCGGTTGAG	3273	1186	259	1342	734	182	298	238	753	142	137	102	109	234	335	2508	364	292	202	1438	138	136	115	372	45	367	67	39	210	38	37	891	167	1814	147	72	156	19	976	524	8054	101	421	442	25	118	3905
Control	mCTRL0189	TCACACGGGATCTCGCCGGT	3292	1180	46	349	1123	167	260	700	206	128	263	29	26	37	259	70	151	1632	801	117	3375	45	1029	14	14	57	8	0	45	11	51	921	35	4	350	15	6	34	39	7	5	8	23	192	13	1071	19
Control	mCTRL0190	CGTGCGTTCGTAATAAAAGG	1376	349	9	1	2	13	39	22	11	23	0	4	12	3	3	5	16	1115	187	862	4	12	33	263	641	4	0	0	1	1	3	0	0	22	0	0	1	1	4	0	11	0	1	122	6	0	23
Control	mCTRL0191	CCCCTTCGATATCCGATGAC	5382	1291	105	123	21	520	122	7	231	28	26	63	13	83	15	81	59	38	156	6	21	66	48	238	314	51	6	7	6	7	21	114	3	26	9	9	320	2388	11	99	342	26	34	7	12	5	30
Control	mCTRL0192	CGTGATTCCTAAGCCCCCGC	5627	1812	133	1198	93	169	26	42	60	211	116	333	516	120	203	27	132	143	56	59	74	24	183	4042	39	147	1	18	15	299	15	33	74	32	103	19	11	10	18	24	56	85	311	27	26	91	10
Control	mCTRL0193	GCGTGCCATGGGAGGCCGTT	2280	1113	43	120	76	133	224	28	78	25	13	104	90	416	356	118	53	156	64	1772	26	10	95	67	103	2088	14	12	923	937	9	13	124	247	13	227	10	16	242	23	3	1	119	178	485	1107	57
Control	mCTRL0194	GGCTTTACGTAAGGAGCGTA	2046	697	3069	1112	7947	740	179	522	1339	140	442	502	255	176	781	629	1617	750	1333	853	648	777	751	536	71	71	508	35	534	102	163	3895	4645	268	603	311	191	43	1273	1775	118	222	957	88	15	153	834
Control	mCTRL0195	ACCCTAGCCTCATCGCGACC	3989	1229	16	87	261	67	59	51	61	77	8	287	2	18	8	19	13	50	277	339	259	40	27	18	20	461	1	1	42	2	64	10	9	4	9	2	2	3	12	0	4	5	8	17	10	2	13
Control	mCTRL0196	GCTGATTAGACCCGGCGTAA	1724	327	3	22	1	4	16	43	4	6	4	2636	2	7	113	2	1	0	33	0	6	25	21	5	10	39	0	0	0	1	1	6	4	1	0	5	0	3	0	0	0	2	0	4	2	2	2
Control	mCTRL0197	GTTACCCCTTTGGCCGGAAG	2602	627	15	31	1	32	27	3	8	133	56	70	4	141	4	4	6	85	144	4	9	15	16	4	82	469	19	4	0	2	6	0	0	322	6	3	3	2	3	0	0	2	1	11	1	2	16
Control	mCTRL0198	TAACGTTATGTCAAACGCTC	1885	499	1	8	34	26	0	1	2	12	0	2	29	4	2	7	50	156	25	9	9	3	39	9	0	35	6	0	4	0	27	15	22	12	0	0	3	0	0	5	0	9	6	2	14	6	4
Control	mCTRL0199	GGATCGATCCGAGGAACGTG	2483	1254	244	45	134	32	52	14	5	63	93	9	194	15	3	189	60	158	59	91	36	107	54	33	55	304	0	0	3	42	3	9	4	28	7	5	44	7	0	9	6	15	28	9	22	2	3
Control	mCTRL0200	CTGCACGGCACGACATCCAA	3156	1172	32	46	105	39	48	161	201	114	88	144	23	46	3326	166	19	568	17	33	22	17	10	312	94	200	45	0	9	114	15	98	16	13	31	278	170	12	4	34	4	41	6	11	10	3	84
Control	mCTRL0201	GGTCAAAGCGATGTTAGCCG	1342	384	0	0	1	0	0	4	27	3	9	0	6	5	0	11	6	0	0	0	2	0	25	2	20	2	2	0	0	0	0	1	0	0	0	2	0	6	0	0	20	0	4	3	0	0	1
Control	mCTRL0202	GCTTGTAATCTAAAGACGCG	1169	350	208	216	32	129	66	74	13	61	71	329	8	148	2	29	1825	65	24	32	24	295	20	335	307	89	1	0	5	1	0	1	15	1	5	2	56	15	0	0	0	0	5	5	114	0	24
Control	mCTRL0203	GAGATTAAATTAACGCCGGC	461	29	0	0	0	0	0	7	0	0	0	0	0	0	0	1	2	0	0	2	1	6	1	0	0	0	0	0	0	0	0	0	0	0	0	0	0	0	0	0	4	0	0	1	0	3	0
Control	mCTRL0204	CGAATCGGGAAGGCGCGTGT	1495	465	2	12	17	2	11	4	2	1	8	0	1	69	1	2	2	5	2	0	4	9	4	42	5	9	1	0	31	0	1	0	0	0	20	3	0	0	4	0	0	6	2	6	1	0	0
Control	mCTRL0205	GGGACGCTCATCGAGTGACG	1804	670	18	16	179	5	34	34	44	6	32	12	3	9	37	45	12	288	25	13	13	21	222	23	81	101	2	0	3	8	1	0	9	7	5	2	24	128	4	11	7	1	4	10	450	3	3
Control	mCTRL0206	AGCGCGTAAGGCGTAGTTAC	2000	983	8	14	84	780	660	1	33	1	182	2	5	66	11	3	29	11	58	26	9	64	22	581	14	15	2	4	7	0	1	5	25	1	18	1	7	0	1	1	0	1	1	4	47	3	0
Control	mCTRL0207	GTTTCAGCGCGAGTTGCGCG	4905	1557	3	75	28	746	68	67	77	12	228	213	1258	65	354	54	438	53	35	29	119	122	120	680	94	440	27	2	6	6	27	22	286	8	21	8	854	163	11	30	71	266	24	28	5	3	28
Control	mCTRL0208	TCCTGCGTTCCACTCGTACT	7678	2768	454	1440	204	143	325	61	195	49	195	497	34	89	35	40	249	673	64	408	85	34	227	99	43	333	75	88	10	8	11	10	9	44	144	64	42	37	13	12	418	29	64	41	7	7	122
Control	mCTRL0209	GTTATTTGTCTGTCGAAACG	2067	445	1092	356	1394	338	41	195	163	754	65	16138	610	1858	1041	1345	227	1015	2010	6729	2509	36276	15	498	25	144	6095	550	191	143	396	18	430	279	37409	3154	1812	354	43	12	3324	2726	273	10	190	5104	503
Control	mCTRL0210	AATAAGCCTACCCGGCGAGA	1496	532	9	34	19	89	109	3	6	8	15	60	23	34	8	4	1	13	6	7	20	4	14	326	167	10	1	1	27	1	3	0	1	2	4	1	2	5	25	2	16	4	1	4	1	2	6
Control	mCTRL0211	GTACATGCGGCAAGTCGACT	3527	966	8	148	31	20	461	192	11	65	5	59	83	4	111	16	77	128	9	49	81	11	291	175	10268	418	0	2	17	59	0	17	4	30	32	10	18	67	29	118	0	93	14	9	5	9	67
Control	mCTRL0212	AGCAGTTCGGGTAACGCCCA	2063	363	0	25	1	30	64	12	84	28	1353	431	54	107	19368	270	77	128	5	161	2	7	10	87	1388	85	5	0	0	47	6	5	0	671	5	0	0	4	11	144	5	8	14	4	2	6	122
Control	mCTRL0213	TGTACTCGCATAGCGGGGGC	3230	1027	193	1082	2221	591	721	260	441	6179	89	1462	2786	845	26268	4512	4889	1184	26663	765	183	866	2546	3295	89	1060	20	2089	57	187	62	284	11	2158	2790	28	19	228	32	157	115	338	574	349	163	15	1320
Control	mCTRL0214	AACTCGCGTGGGAAGTCCGG	1943	1264	677	5122	220	19742	11424	22050	3755	16077	17859	5220	8328	42976	2827	781	85128	28532	70783	8360	20881	9294	11501	4572	1309	4271	71288	59954	31410	18452	319246	7094	79449	48910	11905	188662	20138	26546	814	128470	436023	61426	175399	293534	1437	14691	464394
Control	mCTRL0215	CCTTGTGGCGTGCCAAACGA	2106	936	48	1300	42	238	61	5	24	24	11	38	429	102	51	35	10	36	33	58	10	41	137	62	113	330	18	4	89	9	2	0	726	11	558	54	21	12	15	5	24	7	5	5	2	3	126
Control	mCTRL0216	TGCCGACGCGACGCAGCGTA	4824	2230	297	46	113	137	170	496	882	24	404	1045	272	1452	359	317	109	248	579	143	35	42	241	166	511	95	31	408	21	60	1400	308	11	48	213	45	605	24	31	115	741	747	585	99	327	48	314
Control	mCTRL0217	TGCGGCAATGTTAACCCTTA	2652	1003	1800	14600	507	249	2713	871	67	272	555	240	886	337	158	186	153	44	3435	22	573	469	299	3860	54	1289	19	11	89	435	13	170	38	33	12	4	67	260	6	5	60	40	16	45	12	137	66
Control	mCTRL0218	TGTATAGTCATCGCCGTAAT	5163	1836	3292	1946	8032	857	1990	702	1325	2278	468	576	121	1954	747	1123	885	990	1443	890	740	878	766	530	164	1181	477	32	559	93	477	4283	4613	1042	794	481	2892	43	1409	2056	187	310	835	263	15	262	1010
Control	mCTRL0219	TAGGCGGACGGTTACATATA	2719	620	5	16	192	5	14	28	18	64	0	17	41	4	22	10	120	580	34	0	41	40	144	28	4	24	0	0	2	2	5	21	29	16	4	0	4	19	8	12	41	16	7	15	21	22	97
Control	mCTRL0220	GATAAGACTCCGCGAGCTTC	1770	507	1	13	3	7	0	23	5	4	0	0	0	4	19	1	4	363	1	3	4	3	1	8	2	9	0	0	5	1	4	5	0	7	15	3	0	0	18	0	0	1	6	2	3	1	0
Control	mCTRL0221	TCGTGCCGGAATAACCACTA	2986	977	9	460	144	202	109	535	238	28	75	484	42	188	4	655	218	42	36	136	43	376	122	56	137	195	16	1	160	0	7	2	2	12	161	7	25	6	292	32	2	158	310	6	7	4	92
Control	mCTRL0222	CGAGTAATTATTTGCGGTCG	2082	579	4	51	3	0	42	25	5	1	0	2	8	10	27	2	0	3	1	8	5	64	3	84	32	1	0	1	28	0	0	0	5	12	7	2	5	12	0	0	2	2	2	0	1	6	4
Control	mCTRL0223	TACTTACCGACCGACAAACG	2562	742	2	10	10	69	303	0	7	2	543	38	6	108	13	21	5	0	1	78	0	3	117	12	7	2751	3	0	2	3	0	0	0	3	4	5	6	0	3	2	0	2	190	3	70	1	5
Control	mCTRL0224	ATGGTGGCTGTACTCGTAAC	3667	910	25	82	63	4165	984	279	253	1044	93	733	468	2714	182	1659	3178	51	169	45	210	263	115	1283	947	221	2098	18	47	645	135	94	48	27	118	303	300	29	4	103	4	39	475	182	19	30	6327
Control	mCTRL0225	TCGTAAGTTCGCTATATGCC	6135	1096	143	57	78	191	36	308	80	74	10	596	71	65	228	34	351	119	44	31	131	22	576	130	40	30	8	13	12	195	0	24	2	9	5	2	33	2	5	18	7	8	13	14	5	22	1786
Control	mCTRL0226	CCGGCTTGAATACCGTGCGG	1452	359	1	17	1	32	287	63	398	12	132	2	124	0	9	8	745	22	22	73	9	2	30	179	0	6	174	87	18	3	359	0	106	14	213	41	31	0	1	25	56	3	20	8	1	7	1721
Control	mCTRL0227	GGCCCAACGAAACTAGCGTG	1601	272	0	1	15	0	169	4	10	4	13	0	25	0	0	1	0	9	12	0	2	2	1	6	39	0	1	0	2	66	0	0	1	6	4	1	0	0	2	1	0	0	0	2	2	5	0
Control	mCTRL0228	AGCCGCGCCGCAAAGCTTTT	2671	689	39	1	61	1	15	22	393	2	119	3	0	60	107	6	88	6	43	1	69	12	5	7	181	122	0	0	0	2	2	0	3	0	0	1	0	0	13	12	0	2	3	3	14	0	0
Control	mCTRL0229	ACACGACCGACCGGTGGAAT	2069	394	0	16	22	38	9	28	3	82	113	1	5	240	7	1	879	4	4	5	2	12	0	5	23	3	0	2	0	1	0	3	0	9	22	0	4	3	0	0	1	0	1	79	2	0	2
Control	mCTRL0230	AAACTCATACGTAGCGAATC	1525	450	105	396	166	4359	2168	1900	352	77	476	393	412	437	405	132	299	1048	823	62	1246	268	789	2431	20	3925	363	49	73	128	462	358	306	15	89	199	119	870	111	447	68	54	125	1937	593	7	680
Control	mCTRL0231	CGATTGACGTTGGGCTCTCA	4635	1176	140	100	15872	302	344	542	130	40	137	1785	288	18	90	22	60	115	24	168	15	56	38	175	787	102	262	20	116	10220	55	28837	185	6675	4385	29	55	1625	1094	768	242	126	519	1667	1195	1982	42
Control	mCTRL0232	AACCAGCATTTGACCGCGCT	3270	511	3	7	91	31	103	40	12	28	1018	21	110	0	1	54	2	158	16	2	63	4	7	8	7	17	3	5	0	0	0	0	120	5	2	3	14	3	48	0	3	5	46	19	21	1	24
Control	mCTRL0233	ACGTCGGTCTAGAGTTAAGT	1730	726	5	9	151	221	20	18	43	151	2	2	21	46	2	67	34	4313	3	10	50	2	2	21	45	11	9	6	6	0	14	0	1	0	37	8	2	0	0	0	0	4	2	2	4	1	3
Control	mCTRL0234	CTCCGGACGTGCATCCGAGA	3678	1909	417	14	21	39	870	18	52	155	19	28	41	75	159	26	23	329	10	14	15	70	1179	20	47	97	45	10	23	7	11	2	16	5	7	44	6	16	11	60	26	6	1809	16	30	2	224
Control	mCTRL0235	ATAAAGTCCCAGGTGCGCGC	2087	363	241	118	1107	350	722	18728	54	47	498	344	24	55	54	146	191	17	48	4924	3	106	76	12	32	34	2391	26	55	550	5	341	2	238	71	23	55	17	21	36	7	781	7	4	24	127	92
Control	mCTRL0236	GCCGCTCTTGATAACGACGC	1658	345	3	38	30	187	1	2	121	251	31	2	62	0	83	63	130	167	6	6	242	0	6	69	5	5	0	18	3647	4	0	1	5	26	8	12	23	2	23	0	2	0	3	1	5	2	1
Control	mCTRL0237	CGAAACCATACCTCCTTCGA	3836	667	12	0	18	21	10	57	32	9	51	3	4	8	1	27	8	18	13	91	3	6	15	13	592	53	114	2	3	4	2	0	1	2	4	0	1	232	2	20	13	3	56	3	2	0	1
Control	mCTRL0238	CGCGCCTACCCTTTTACCGC	6861	1138	29	49	69	139	69	1579	83	1553	60	488	37	440	4269	964	3079	31	37	245	44	17	1909	58	133	4	0	3	246	58	786	614	12	412	26	4	118	104	3558	345	47	101	193	80	56	214	54
Control	mCTRL0239	TACCCCTCTGCGATGCCGGT	4391	1231	84	190	4127	94	751	47	296	83	102	8031	243	131	149	33	57	222	88	21	446	125	1209	646	29	735	13	4	98	27	50	45	42	58	14	110	33	15	338	16	298	169	402	57	56	6	105
Control	mCTRL0240	ATATTGTCCCATACGATCGG	2445	365	16	55	0	103	4	6	0	0	15	0	8	0	4	15	7	97	15	4	2	2	0	2	0	0	0	0	5	0	0	0	0	0	0	250	0	19	8	0	0	0	0	2	3	0	1
Control	mCTRL0241	GGATTGACGAGACGATATCG	1326	195	50	40	137	32	117	27	394	952	46	1549	410	110	123	2147	7	73	5	18	12	226	102	109	11	28	23	7	41	48	449	347	27	650	11	18	21	39	155	18	11	28	5	42	5	3	29
Control	mCTRL0242	CACGTAAGACGCTCCACTTA	2978	732	12	5	34	8	16	19	7	13	84	282	146	16	42	191	49	8	37	107	47	9	48	168	40	21	1607	18	7	217	50	6	2	2	8	12	2472	38	2	14	0	2	8	42	5	10	8
Control	mCTRL0243	GGAGTCTCACGCAATTAGCG	2399	478	3	3	27	1	0	4	1	31	7	10	0	18	3	2	34	6	2	14	14	37	2	14	2	4	2	0	6	2	22	1	0	1	0	9	0	1	13	12	0	0	2	3	1	1	6
Control	mCTRL0244	ATCGCAGGTCTACGCAGAGT	2552	810	334	11	147	26	15	5	125	36	69	3	29	7	19	6	12	18	19	17	17	7	18	23	85	18	2	22	49	1	4	7	5	9	4	2	1	3	2	39	2	3	186	4	2	2	3
Control	mCTRL0245	CGGTCGTGACAGACCTGGTG	2119	548	14	246	272	67	72	148	809	45	1350	47	42	912	56	34	280	66	756	140	15	246	47	218	47	222	58	1	26	55	3	102	17	23	9	4	23	5	554	4	0	49	50	11	2	6	60
Control	mCTRL0246	GCCACTCCGCTCGTTCTAGA	2933	824	100	55	481	57	179	362	201	32	27	148	64	1345	21	187	647	104	1680	46	74	511	65	14	0	51	60	520	193	15	13	1566	2152	39	367	28	52	3166	4580	1481	130	3447	112	405	1252	90	132
Control	mCTRL0247	CCGTCGAGCAATCCCGCCAA	3242	2850	76	240	544	633	1898	130	182	45	822	816	229	674	90	427	74	230	73	407	2760	224	83	43	44	156	16	11	316	9	23	12	9	31	180	8	10	17	10	16	1	6	27	29	17	6	21
Control	mCTRL0248	GAGTCGAGTTAATAACGCTC	977	315	1	138	0	22	1	2	0	1	2	0	17	44	2	2	1	4	5	3	5	1	2	93	37	2	34	1	12	149	3	2	1853	9	4	752	0	8	1169	7	86	201	70	7	21	2	19
Control	mCTRL0249	CAATATCTAAGCGCTAACGA	1445	344	1	34	0	14	0	3	15	0	15	7	154	0	0	2	1	6	2	0	2	2	15	1	2	10	2	0	4	24	0	10	0	1	0	0	1	195	1	0	0	0	0	0	4	4	2
Control	mCTRL0250	ACCCATCCCCGCGTCCGAGA	3842	850	21	34	23	38	140	23	40	23	25	115	16	40	127	3	9	13	61	1386	63	9	186	21224	84	23	114	56	7382	385	4	3	106	10	33	8	58	3	143	6	42	2	28	5	3	5	0
Control	mCTRL0251	TAATGAGTAACGCTCATCGG	2302	799	1190	1102	1181	3530	763	2619	1450	4969	204	1429	1430	6496	892	610	6828	3226	601	763	1094	477	2690	1470	430	6402	5087	11901	1319	603	2815	946	3516	347	1645	4576	219	812	1186	3493	14851	1825	4100	6154	409	437	7685
Control	mCTRL0252	AACGGTAGCGTACCCGTGAA	2544	667	4	555	498	0	10	1	10	11	5	1	7	4	32	15	422	314	2	8	8	5	0	23	28	112	1	0	2	2	4	13	14	12	0	0	10	1	2	0	96	22	4	47	4	0	3
Control	mCTRL0253	CATCGAGGGTAAACGCCATT	2846	748	11	39	4	37	13	17	12	10	181	11	24	148	64	12	6	7	18	2	52	11	6	15	6	28	3	0	9	2	5	17	0	0	1	15	4	9	5	2	1	0	12	2	6	3	12
Control	mCTRL0254	CGTCACCGCTAGTAATGATG	3067	764	1233	99	77	90	577	75	264	66	396	978	1	84	312	254	94	8	101	34	4300	93	1238	3	14	7	10	0	13	45	0	45	0	529	139	21	9	943	159	4	535	2012	377	26	7	15	6
Control	mCTRL0255	AATCACCGACAACGTAAGAC	1268	394	2688	750	73098	3181	127	125	120925	543	32	46	1037	3320	776	207	7	555	104	9	23	1227	57	5875	5	3	0	1	206	67	18059	1094	58	1446	29	148	1	13	1	10	0	525	5	11	4	49	0
Control	mCTRL0256	CACTCAGCGGTTGGACGCCC	3058	458	4	136	70	16	9	1	9	9	35	610	3	7	239	3	12	2	65	1	3	16	13	7	0	21	0	0	5	3	2	1	1	7	30	0	3	27	36	0	0	3	36	4	0	5	3
Control	mCTRL0257	TCCGTAGGACGTATATATTC	1130	169	1	0	12	5	0	0	0	5	43	0	0	0	0	1	1	2	20	0	1	63	9	11	3	1	0	0	3	0	0	0	0	0	2	0	0	0	0	1	0	0	0	2	1	0	0
Control	mCTRL0258	AAAACGTAATTATACCGAGC	680	110	2	254	1	0	0	9	2	1	2	0	1729	0	13	16	1	1	1	0	1	0	48	0	0	2	5	0	0	0	0	0	0	0	1	0	1	0	0	1	0	0	0	0	7	2	0
Control	mCTRL0259	TAGGCCGCTCAGGCCGCACT	2589	878	4699	1143	3537	8051	272	2678	103	5635	289	15255	178	55	2172	6628	7235	1978	194	1229	2156	8337	654	768	414	6732	134	41	169	4080	89	117	138	123	476	36	303	37	118	77	13	436	1	9	21	2069	271
Control	mCTRL0260	CCCACTTAATAACGCCGCTT	3424	857	228	54	20	42	407	1860	132	15	336	207	318	104	108	34	25	34	454	2716	55	139	919	160	83	17	21509	20734	30	58	347	430	28	1197	1314	360	62	56	19	675	145	8805	85	21	23	191	347
Control	mCTRL0261	ACCATACGGGGTCTTGTCGA	2827	278	17	790	121	1	3	2	20	0	3	9	5	2	3	3	71	4	10	30	1	1	3	3	0	3	0	0	3	3	0	0	5	1	1178	1	63	0	10	15	0	4	6	29	429	75	1
Control	mCTRL0262	ACGGAACCCGATCGGAACGG	1727	365	13765	8924	9061	8311	23914	4377	2263	37025	1085	8241	11591	12123	19993	7693	597	356	1130	444	668	4263	6783	4850	21069	1730	14720	957	80018	4429	144	4420	176078	14435	3993	1527	48836	8054	840	8350	3839	275	16655	18157	2012	9882	255
Control	mCTRL0263	GTTGCGTCCATTCCGTCGCC	3729	373	4	4	26	61	2	26	3	1	354	4	7	7	5	4	64	0	5	0	13	5	0	2	0	4	0	16	2	0	0	0	0	1	6	10	13	0	1	0	0	0	2	3	0	4	2
Control	mCTRL0264	ATTCCGTTTGCAGCGAGACC	3611	693	19	41	78	29	17	12	17	30	45	26	27	19	61	4	5	13	6	2	24	3	161	5	3	80	0	0	9	0	1	0	0	1	6	9	1	240	1	3	0	2	1	5	1	0	9
Control	mCTRL0265	CCATCGGTTCGACTTACCGC	5584	1431	296	8568	6104	894	2796	1005	3796	472	281	304	6122	5632	126	2428	795	5603	2146	1035	1166	4034	7991	931	2172	2313	8907	200	1937	2590	13932	86	404	1351	2039	1316	332	978	1693	995	1264	312	80	1639	113	233	4479
Control	mCTRL0266	CATCGGCTATGTCGGGGACA	2659	569	25	98	27	24	34	2	102	0	7	17	1654	1	33	22	18	5	0	2	143	11	43	33	26	512	6	13	5	1	3	1	0	35	3	8	4	136	0	6	23	33	24	86	5	5	4
Control	mCTRL0267	AATGAGCGTCTCTCGATCGC	3133	906	11	15	2	26	13	11	54	15	285	1	66	10	492	2	45	3	21	4	34	40	1686	61	17	35	0	6	81	5	10	39	51	10	23	0	8	2	211	3	68	9	17	615	10	110	13
Control	mCTRL0268	TTACTGATCAGTCGGACGCA	3190	760	5	62	380	805	205	19	42	9	627	107	10	8	34	496	88	163	45	11	90	19	19	75	38	7	0	4	63	0	2	1	114	16	123	3	5	59	1	4	105	1	25	371	4	10	1
Control	mCTRL0269	GATTGAGAAGCCGCGGTATC	1629	170	1	1	0	6	0	5	36	0	9	2	4	2	4	1	2	6	8	2	5	635	3	2	6	6	0	0	0	1	0	2	2	0	0	0	2	0	0	0	2	0	23	0	0	0	0
Control	mCTRL0270	GTGATGGCCACGTCCGAACC	2943	1040	26	120	146	50	12	27	112	72	15	222	15	26	457	835	28	13677	11	6	4	46	9	47	7	14	4	5	0	10	1	0	15	7	116	3	2336	5	6	4	3	8	25	12	5	31	5138
Control	mCTRL0271	TTGGACGTACACTTTCGTTC	4856	1307	162	573	79	473	75	17	85	41	112	6567	117	235	20	714	47	27	14	198	77	27	183	367	40	148	290	5	113	7	6	302	18	43	56	15	157	85	64	45	22	12	36	13	18	3	21
Control	mCTRL0272	ACTGCGCGTATAGGACGCAA	2171	573	12	0	0	35	0	11	22	8	104	2	28	9	272	9	3	0	1	0	4	3	5	184	4	36	1	3	18	38	0	1	2	1	1	5	0	8	2	2	0	0	0	2	3	0	7
Control	mCTRL0273	TAGCTGTTTACGCCGACCTG	4747	538	4	0	1	16	36	2	5	3	7	13	10	11	293	9	11	279	4	4	8	1062	4	17	19	9	3	0	2	27	1	1	48	1	3	3	1	10	0	1	0	1	1	3	7	6	2
Control	mCTRL0274	CATGCCCGTCTGCGCCGCAT	7067	3008	1781	1325	1071	1851	1640	1889	1105	1610	2894	384	1117	468	371	1001	934	2602	2198	1613	757	556	3628	19447	1016	873	208	86	1012	378	111	1738	439	1891	480	399	559	667	865	697	674	576	125	990	1874	417	197
Control	mCTRL0275	TCAACTATGAACCGCCGTGC	4502	1052	53	19	1	62	22	10	1	123	39	7	10	20	9	71	293	390	297	21	903	29	10	21	23	142	1	2	17	2	3	10	0	27	4	1	295	12	103	0	0	3	0	5	4	9	312
Control	mCTRL0276	CGTTACGTTTCTTGCCAGGA	3904	1129	6	50	73	287	194	97	495	10	38	8	54	58	636	476	88	120	6	6	68	15	12	9	52	410	170	1	171	2	4	1	1	5	30	7	2	85	2	27	0	5	9	7	72	23	1
Control	mCTRL0277	TCTATATCTAGTCTCGGCGC	2384	297	0	8	10	5	16	4	12	0	1	7	34	232	512	1	38	1	33	2	6	3	3	192	0	230	0	1	1	0	8	0	0	0	4	1	0	0	4	1	0	1	0	0	2	2	3
Control	mCTRL0278	CTCCTCGAGGCTGGCTACGT	5483	2046	570	537	2294	1563	264	709	952	106	4696	355	527	352	4827	232	1232	558	1675	567	404	677	544	505	1003	3745	55	145	69	2599	57	354	3630	104	187	133	38	59	394	117	111	34	72	131	229	14921	1808
Control	mCTRL0279	TCGTACCGCACGTGTAAGCC	4815	1554	36	39	76	375	211	25	106	15	82	87	39	99	17	54	97	26	79	30	184	82	67	48	13	76	2	12	26	15	7	779	8	198	130	10	2	25	79	5	0	2	148	37	10	2	12
Control	mCTRL0280	CGGGCACTAACCCGATACAC	3239	1471	397	8239	2027	825	117	77	546	4050	2748	2013	4377	154	54	286	94	98	368	222	247	1832	1032	2151	4903	368	68	215	25308	166	10	66	50	784	271	772	99	5801	65	129	809	150	7115	170	50	334	173
Control	mCTRL0281	GAACGTAACGGCATGCATCA	2430	949	791	202	216	2185	2076	1839	257	142	924	744	457	242	570	469	140	212	1169	713	125	178	60	3994	261	366	9	15	39	282	41	9	408	724	705	25	155	74	240	157	3020	132	314	24	282	58	151
Control	mCTRL0282	GCCCGATAGAATTACCCATT	2605	552	5	159	7	12	31	51	26	93	7	13	8	38	20	35	6	39	22	4	20	12	7	27	6	5	6	18	2	2	2	10	57	16	20	9	5	5	2	3	1	2	19	6	3	1	2
Control	mCTRL0283	GCCCTCGAGCTCACGATGAG	3403	711	13	45	6	90	31	18	91	26	66	346	21	216	43	6	6	15	28	6	146	10	8	21	2	83	1	5	43	2390	53	18	261	22	9	2	2	2	2	0	3	22	2	9	3	55	5
Control	mCTRL0284	TTAGGACGTGCTTCCGAGGG	2721	1890	412	222	212	185	1044	58	1455	1025	1134	158	740	351	53	1635	976	205	236	34	16	321	306	68	64	269	28	7	33	36	17	14	303	27	55	12	27	9	3	3	13	5	69	35	6	5	16
Control	mCTRL0285	TAGTTAACCGTAAAGTGGGC	1814	187	3	5	0	0	3	0	11	1	0	174	0	0	1	3	1	180	4	8	2	5	0	22	0	0	0	0	0	7	0	13	0	2	0	2	0	0	59	11	0	0	0	1	3	0	73
Control	mCTRL0286	GTGGGCTGACCGTTCTCGAC	3365	1075	12	57	73	23	133	42	57	99	17	65	235	30	235	280	129	38	267	104	34	192	47	358	3976	6	18	8	13	1433	15	24	42	43	82	18	36	48	10	49	59	13	77	12	5	14	36
Control	mCTRL0287	CAAGAGTTAACCTCGACCGG	1235	388	112	11	20	6	2	30	2	7	587	5	0	18	238	3	1	19	0	1	3	27	1	10	6	310	3	586	45	0	1	3	1	52	53	2	6	2	0	0	0	3	19	888	1	1	7
Control	mCTRL0288	TATGACTGCACGACTCGCTA	2709	808	21	1889	25	466	694	336	200	140	369	2344	75	22	450	301	667	15	5519	51	29	34	2298	13	149	311	5461	15792	593	27	12	1270	27876	792	2024	107	6496	7522	1851	691	13	340	123	320	318	1951	266
Control	mCTRL0289	GAACCGGCGTGCGTTAGCGG	3062	1777	7551	2600	5761	808	17465	499	6487	7183	8777	5676	3171	10312	5525	2312	567	12576	8870	1558	1151	22066	10541	1006	1244	1364	230	8	1035	2083	62	29	118	103	209	12	254	2097	98	25	1	133	33	424	1753	272	30
Control	mCTRL0290	TTCGATATAGGGGACGGCGG	2530	454	0	24	2	1	0	6	32	2	3	1	54	5	56	1	26	3	29	5	6	2	2	4	0	15	4	5	0	0	0	0	0	0	0	2	0	8	0	0	0	0	0	11	1	0	2
Control	mCTRL0291	GCCGTAAGCGGGCCGGTTGA	181	17	0	0	0	0	0	0	0	0	0	0	0	0	0	0	0	0	0	0	0	0	2	32	0	0	0	0	0	0	0	0	0	0	0	0	0	0	0	0	0	0	0	0	0	0	0
Control	mCTRL0292	CGTAACCGGAGATAATATTA	1197	267	32	206	566	227	65	13	8	86	477	830	28	100	37	177	122	28	1	32	23	7	22	24	24	433	7	12	0	28	0	2	0	2	7	7	2	60	8	0	0	2	13	7	4	11	4
Control	mCTRL0293	CGGCGATAACAGCGACATCG	1450	164	1	0	0	2	12	3	3	3	1	4	1	4	0	2	0	1	4	26	3	1	3	0	14	1	1	0	1	0	0	0	3	1	1136	0	0	7	4	18	0	4	0	1	0	0	0
Control	mCTRL0294	TCACTTCGGGCATTACGAGC	2781	517	12	27	27	62	18	21	119	1	54	11	21	28	18	49	46	31	14	11	5	45	8	72	16	27	1	0	10	0	8	3	0	0	4	7	1	7	0	1	0	1	3	10	2	0	10
Control	mCTRL0295	TAATAAACTATGTCCCGCCG	2972	443	0	11	50	0	3	0	0	5	11	103	10	6	0	4	3	10	1	0	5	5	6	1	59	2	0	0	3	0	0	0	2	0	1	0	0	0	0	1	0	3	0	0	4	1	0
Control	mCTRL0296	TGGCACGGAGTTGCATACGC	3569	1651	1932	660	626	1206	877	1070	1223	1911	1083	528	1321	692	45	417	990	271	111	418	1728	475	67	628	943	1065	412	43	416	321	101	229	10	392	174	167	75	44	33	98	81	41	378	312	463	30	54
Control	mCTRL0297	GCTAGTTCTCCCGGGCGAAA	1185	158	0	57	0	8	2	1	1	1	4	0	2	2	1	13	34	166	1	0	4	5	1021	3	5	3	0	0	0	0	0	0	0	4	2	0	0	0	13	6	0	1	1	2	3	0	0
Control	mCTRL0298	GTTCGGTTGCAGCTTACACG	5165	928	19	28	27	9	14	5	12	14	43	8	41	89	1	138	88	13	22	40	109	14	197	67	70	133	1	7	2	69	1	1	6	417	2	5	15	8	1	1	1	37	5	12	9	4	14
Control	mCTRL0299	GCACCTCTAGCGCGCTCGGC	3334	684	14	164	34	179	915	499	144	12	17	21	32	11	2	27	36	4	90	8	19	2	77	206	87	238	30	9	6	556	14	4	8	61	5	4	172	9	24	9	19	6	13	84	55	125	1
Control	mCTRL0300	CATTGTAGACTCGTACGGAT	2851	323	35	7	1353	649	179	6	121	3578	275	7	962	979	364	50	4	1759	2	8	5	247	729	110	0	57	1	0	33	1	7	1	0	16	5	7	5	6	26	20	78	7	3	2	4	10	0
Control	mCTRL0301	TCGGAATTCCGCAGGCCGAG	2001	438	74	8	4	3	13	14	1	0	1	7	7	13	24	0	3	41	4	2	6	6	12	4	6	10	1	0	0	12	0	0	0	9	0	0	1	0	1	0	0	0	4	4	1	0	0
Control	mCTRL0302	GATTACGGGGTTCCGTAACT	1326	392	0	0	10	13	10	1	0	6	104	0	7	26	53	240	41	1	0	1	4	5	182	1	14	4	0	0	3	0	0	0	3	0	7	0	1	1	0	0	0	1	0	0	4	0	2
Control	mCTRL0303	GCCTATGTGAATCGCGAATT	2829	955	2	29	1207	15	9	5	32	13	7	13	130	3	70	6	3	13	11	4	6	2	11	28	17	36	1	0	0	0	0	0	1	0	0	1	5	2	2	0	7	10	6	7	4	0	3
Control	mCTRL0304	CTCGGACGGCATACGACAAT	2914	915	33	201	1695	231	730	202	45	766	120	355	84	1011	239	1499	17	46	140	2391	314	155	176	244	1572	12	25	28	569	401	126	69	1	27	501	19	368	6	43	17	208	24	174	261	6	355	23
Control	mCTRL0305	CATATGCTCGACGGTATAAA	1088	136	0	2	0	7	2	1	1	0	0	0	0	1	1	6	1	1	2	0	0	0	3	0	2	0	0	1	0	0	0	0	0	0	4	0	0	0	0	0	0	0	0	1	1	0	2
Control	mCTRL0306	CTCATGTACGCCTTCGCTAC	6406	1342	1336	913	355	1002	861	346	4864	2450	613	486	338	4681	1539	246	2608	485	2071	580	79	739	250	2758	1229	400	39	123	1281	843	4409	2629	209	413	96	316	7173	754	22	267	155	44	181	3098	23	439	72
Control	mCTRL0307	TTACAGTTCATACCGTCGCC	5492	1552	211	545	5505	704	1879	887	1268	4476	306	7024	2841	561	2178	7232	169	3029	905	186	337	3133	543	673	205	966	322	102	3017	332	1693	1285	1248	2276	5116	735	182	91	851	2812	1185	220	853	998	37	29	249
Control	mCTRL0308	GATGGCCAGTAACGGCGTCA	2325	412	3	639	3	38	28	1	3	2	14	3	6	0	1	2	13	2	6	9	5	3	15	7	8	30	4	4	25	1089	5	89	2	967	3	0	23	4	9	38	0	3	2	14	4	0	21
Control	mCTRL0309	ATTTGAATGCTCCCGTCGAC	3621	899	4690	6278	18849	22609	6310	12531	6945	13518	33611	23300	3741	19879	4329	31344	1999	30858	7627	5068	6956	2969	8990	8903	7335	3840	48533	39242	9134	18660	22075	5844	25519	27344	9642	8455	6649	3749	10579	5810	2946	16436	8612	3206	25962	2436	24015
Control	mCTRL0310	CAACGGTCACGCTAGAATAA	1319	406	316	5987	267	326	44	21	84	9	111	43	150	12	4	11	53	17	13	11	888	14	47	37	11	2	4	2	8	94	1708	160	111	26	21	7	11	1930	24	9	10	32	2	9	3	1	2
Control	mCTRL0311	CTTAAGTTCGCGACGGAATG	2737	539	4	0	18	98	16	10	80	60	31	2	7	4	7	24	4	0	4	112	11	2	6	21	1	50	0	0	3	1	0	2	0	3	0	0	1	2	0	3	0	1	0	4	3	0	1
Control	mCTRL0312	TACTTAGGTCCGCGTAAAGC	2790	757	56	16	239	23	12	21	433	36	199	19	15	21	156	17	40	101	5	40	4	644	28	193	241	271	1	0	4	22	4	3	0	202	20	7	0	63	5	7	4	0	3	40	5	403	19
Control	mCTRL0313	GGTTAAAAATTAAGCGGTCC	726	326	2	2	0	1	1	3	0	18	3	0	0	3	3	0	4	24	4	2	2	0	1	0	0	0	0	0	0	0	0	1	0	0	7	0	0	3	0	0	0	0	0	2	2	0	0
Control	mCTRL0314	AAAACGGCTCGATCGGTGAT	1384	175	1	0	0	3	0	0	1	0	2	3	20	2	0	1	4	1	2	2	0	4	15	7	2	1	0	0	0	0	0	0	0	0	0	2	0	1	0	0	0	0	0	1	1	1	0
Control	mCTRL0315	ATGTTACGTACGTGATCTCC	4289	1490	3183	4870	4164	3295	1769	10797	9057	11251	988	13293	21351	1687	5713	7178	17414	3955	1237	1631	1053	2568	6192	7381	4707	43234	1175	5701	2232	2912	461	27744	1256	2267	27026	639	3738	1790	587	2319	2273	6284	15550	639	5108	659	664
Control	mCTRL0316	AGTAGACGCTATGTTCGCGC	2958	490	1229	639	1573	200	908	282	275	394	70	17442	749	2329	1185	1324	299	691	2361	7058	2793	40043	27	585	26	258	5798	617	204	284	380	34	525	1041	36756	3547	2001	338	50	37	3789	3045	302	56	221	5056	562
Control	mCTRL0317	TACTGCGTACCGCAGTAAGC	1138	429	8	52	25	15	7	1	12	3	128	15	0	11	1	9	103	3	10	2	26	12	38	55	61	20	0	5	2	1	6	11	0	2	3	2	7	5	1	1	1	3	16	2	1	1	2
Control	mCTRL0318	CCCATCATTCGCGCTGACGT	6192	1651	433	106	581	1280	107	65	66	4815	244	37	383	95	84	186	572	365	127	23	517	34	255	56	163	435	33	273	7	8	33	165	4	45	232	21	67	96	25	7	14	19	40	82	24	5	147
Control	mCTRL0319	CGACTATTGCCGTCCATCTC	6261	1948	2656	511	7307	188	1226	773	292	686	47	68	3015	73	163	173	2126	2003	54	175	157	487	963	152	1910	135	68	194	9	21	713	23	140	17	44	9	85	1773	38	43	146	30	137	25	11	38	101
Control	mCTRL0320	ATCCGTACCAAACACGCTAC	3221	454	1081	70	35	49	941	18	274	866	39	50	28	58	16	43	122	6	10	14	4	8	308	1266	5	2741	42	299	29	110	79	108	356	47	6	10	14	3	470	20	2	29	127	12	33	20	5
Control	mCTRL0321	TGCGTAAAACTTGCGCTCGA	1833	307	1	8	3	0	6	15	4	9	701	6	5	6	7	3	142	11	140	74	27	22	20	28	5	17	6	12	2	7	86	1	4	4	5	3	9	1	3	9	5	4	14	2	8	5	3
Control	mCTRL0322	CATATGCCTATAACCGGCGG	1855	253	2	0	0	3	0	1	1	2	0	2	1	0	14	3	0	6	5	2	8	1	1	4	0	0	0	2	1	4	0	0	0	0	0	0	0	1	1	0	0	0	0	0	1	0	0
Control	mCTRL0323	GTTCCGGATATATACGGTTA	1682	479	125	9	25	18	0	7	2	3	154	98	13	0	5	33	0	59	8	3	1	5	5	5	3	53	124	6	2	0	2	2228	10	2	5	0	56	9	1	0	4	1	5	4	4	9	1814
Control	mCTRL0324	CTAATACACCCGGACGGTAC	2874	508	0	31	16	10	0	4	3	32	0	12	10	0	6	21	6	3	5	2	4	1	0	1	1	48	2	12	42	10202	60	7	6	13	14	0	0	0	0	5	0	41	1	3	18	94	3
Control	mCTRL0325	GGGCGGGACGTAATATTATG	1406	391	12	11	2421	36	0	65	9	3	22	4	9	7	3	7	1	4	5	6	3	14	1064	3	41	3	0	0	1	3	0	10	3	5	9	3	0	8	1	5	288	173	2	0	1	3	2
Control	mCTRL0326	ACTTTACATCATGTCGTCGT	2192	626	81	768	1203	846	3901	400	191	184	853	518	4756	90	166	138	3284	527	175	525	240	218	322	830	150	667	22	4	89	162	31	47	6	1005	191	18	88	166	77	80	75	416	126	149	8	33	105
Control	mCTRL0327	CTGATCGGTGCATATCTCGG	4476	1626	30	184	2477	322	16	83	233	362	66	112	80	867	307	67	1455	216	166	112	163	18	492	109	1508	1252	43	2	6	10	12	14	21	34	531	2	3	3	6	56	104	4	39	429	6	3	37
Control	mCTRL0328	GAGCCCCAACGCGCGAAGCA	1296	271	1	66	5	106	4	3	0	25	30	3	32	258	3	182	21	30	17	1	17	8	15	23	132	7	1	0	8	0	1	0	1	9	11	0	35	7	165	2	2	5	8	2	4	12	4
Control	mCTRL0329	GCTAAGATTCATCCGAACAC	1628	232	0	6	83	0	1	2	0	2	0	1	130	0	0	0	0	0	11	0	1	0	0	0	0	23	0	0	0	3	0	0	0	0	0	0	1	0	6	0	0	0	0	4	0	0	0
Control	mCTRL0330	GTTACCGTGACGATAAGAAT	1972	439	2	2	1	3	33	3	14	0	174	12	5	31	17	184	19	12	2	4	1	74	42	2	22	5	0	0	7	1	0	1	0	0	12	2	1	0	22	0	0	0	24	1	3	1	27
Control	mCTRL0331	GCTAAACGTATTTTACGGGC	1399	349	8	9	47	38	15	12	2	0	1	92	1	23	3	0	1	1	32	0	0	0	36	1	18	3	3	0	0	2	2	1	0	0	0	0	0	0	2	0	0	13	0	1	3	1	2
Control	mCTRL0332	CCGAGCCGAATTGGGCGTGT	1616	298	6	3	8	25	27	2	12	0	0	1	91	1	79	4	1	2	0	1	24	11	23	19	0	2	0	1	0	2	0	0	0	0	0	0	0	19	1	6	2	3	2	0	1	1	78
Control	mCTRL0333	GTTGCGTGTGTCCGTACAAA	1975	542	5	11	8	70	720	2	13	129	46	4	2	1	46	5811	104	8	17	17	14	1378	788	42	8015	43	0	0	16	1	527	0	0	101	9	1	4	3	0	3	0	167	5	3	1	2	38
Control	mCTRL0334	CTTTATTCCGTTGCATGTCG	7845	1465	502	216	830	52	1545	106	117	91	172	67	846	98	1632	55	70	160	877	26	24	171	797	809	39	218	81	10	17	9	17	28	19	216	2320	14	50	136	66	39	55	11	30	40	14	35	180
Control	mCTRL0335	AAGCGTACCCCACTCGTTAA	3166	564	19	29	12	25	1579	8	9	275	241	44	292	60	0	22	13	7	80	21	16	3	13	72	4	9	4	2	2	0	0	0	0	1	12	14	0	4	0	2	0	4	1	5	5	25	1
Control	mCTRL0336	ATCCGAGATCTGCGAATTAT	2630	462	30	7	0	73	7	9	62	5	5	12	10	3	1	754	6	258	76	21	14	3	6	12	546	236	0	3	2	20	1	7	2	3	5	2	0	0	12	1	25	1	2	20	5	0	0
Control	mCTRL0337	TCTTGACTCCGACTTCGGGC	3975	789	41	574	338	138	80	23	764	139	133	281	373	265	1078	302	314	9	301	123	9	400	119	1059	2436	1184	21	9	232	26	123	304	14	46	30	184	351	507	5	23	1967	14	149	11751	10	11	33
Control	mCTRL0338	ACCATGATGTCACCGCCGCA	4062	1021	7343	594	3969	676	409	111	224	538	343	7307	6418	366	359	855	1616	658	762	1303	171	1744	199	889	198	168	364	366	765	405	7	176	5	4737	174	203	388	6843	1351	37	227	1242	700	1077	41	987	1324
Control	mCTRL0339	TCAACTTAACCTCGAGTCCG	3973	907	37	24	189	86	93	659	290	169	19	10	363	179	11	19	1155	27	6114	57	231	1110	995	233	198	60	1062	33	2752	126	9	2	14	71	356	10	25	165	2	24	133	15	43	229	7	2	90
Control	mCTRL0340	CTACGAGGGCCGCGAGCGGT	356	28	0	0	0	0	0	0	0	0	0	0	0	2	0	0	0	3	0	92	0	0	6	0	0	0	0	0	0	0	3	3	0	0	0	0	0	0	0	0	0	0	0	2	0	0	0
Control	mCTRL0341	ATGTGTCATAGCGGCGTAGG	2236	635	7	4	11	57	1	0	34	3	1	2	7	4	14	5	32	60	18	4	3	2	8	3	26	7	2	1	1	52	1	2	0	1	13	2	4	0	98	0	0	0	4	2	3	8	0
Control	mCTRL0342	TGTAACGATCTGGGCGGTCT	5115	1261	508	33	110	94	25	12	45	394	98	7	132	47	188	139	105	26	124	89	5396	443	320	157	363	52	6	3	11	5	4	8	117	59	222	5	19	23	7	69	15	56	29	8	83	7	25
Control	mCTRL0343	CCGGATCGGCTACGCTACGG	3255	730	16	29	7	12	4108	12	94	2	13	159	46	33	39	7	1155	18	12	11	676	219	66	1	26	27	0	0	4	4	4	4	1	7	133	1	0	0	10	16	44	3	4	620	4	0	2
Control	mCTRL0344	CAATATTCGACCTACGCTCC	4610	820	22	4826	76	72	365	833	711	2074	8	98	377	57	10754	23	51	52	99	305	10	271	37	24	885	12	144	55	12	220	799	6555	51	1262	525	5668	9	1849	7	887	103	135	498	14	226	25	1205
Control	mCTRL0345	TGATAAACGATGCGAACTCG	2691	1134	180	35	325	72	145	1496	61	101	663	200	118	26	4	302	69	126	49	4	12	19	33	6	7	84	7	1	22	77	2	120	42	21	22	12	1	11	0	3	13	25	95	49	4	10	11
Control	mCTRL0346	TGATTGGGGGTCGTTCGCCA	4994	1096	52	298	47	300	1619	39	62	229	4086	175	253	60	15	83	132	12	100	366	57	245	18	14	93	431	17	7	41	4481	37	13	40	116	205	1052	202	9	242	54	1	29	19	118	1	6	6
Control	mCTRL0347	TAGTCAGTCGGCCTCCGTGC	7203	1310	21	493	68	37	658	549	108	279	4581	53	432	96	125	241	617	1408	697	4124	80	87	492	1881	195	197	22	3	39	14	4378	2199	126	205	2017	21	532	338	90	78	4550	199	112	250	5072	1830	64
Control	mCTRL0348	AACCGGCTGCGCGTTTGCAA	2834	582	27	3186	17	182	465	1138	102	2907	19274	374	3597	98	15883	100	2107	79	122	201	1346	36	731	1986	900	396	7	53	37	372	15	82	38063	53	407	30	3	23	265	9	24	4	250	96	5	6	114
Control	mCTRL0349	GTGCCTGATAGTGTGAAGCG	1699	431	7	196	13	18	364	350	46	35	8	119	174	28	17	24	2	32	2	400	6	3	6	5	0	55	3	10	21	3	7	8	1	33	7	558	44	388	8	3	0	24	11	6	127	511	19
Control	mCTRL0350	CGACGACCCATTTCGGTTAT	5068	1456	293	1085	81	132	612	46	15396	534	52	9831	558	138	58	406	196	25	105	151	798	403	151	149	27	746	294	519	35	25	613	44	23	546	4551	158	2785	1869	402	708	343	54	889	16	502	6	20
Control	mCTRL0351	GGGGGGTCTAATACCGATTG	1	70	0	0	5	0	0	0	0	0	16	10	0	62	0	3	4	1	13	2	0	0	1	0	4	2	150	2	0	1	0	0	0	0	3	0	0	1	0	1	0	0	0	0	1	0	6
Control	mCTRL0352	TTTTTAGACCTAATTCGCGC	3023	524	181	78	95	48	52	76	55	29	6	49	159	28	155	76	45	569	57	4091	52	21	150	12	5	0	40	6	47	9397	14	61	3	224	12	328	7	198	18	67	534	131	835	146	2050	161	12
Control	mCTRL0353	TCTACACGCGCGTTCAACCG	5152	1192	143	624	24	347	123	247	182	5	17	29	320	214	223	97	253	19	54	162	365	45	371	114	28	64	25	0	0	0	509	10	5	16	21	2	32	6	16	131	158	145	39	18	9	59	17
Control	mCTRL0354	CGGGGCGTACATGTGTGGCC	3685	957	618	870	52	827	95	83	24	209	1249	401	150	306	5	104	89	2065	794	77	97	859	25	955	292	115	19	40	31	4	0	29	132	16	613	238	5	17	1103	15	16	37	541	104	781	17	646
Control	mCTRL0355	CGACTCGCTTAACCGTGCAG	2276	824	102	111	658	989	68	467	396	884	1443	2645	386	412	248	1296	96	78	155	84	12	34	290	917	21096	2152	130	90	305	28	30	35	10	73	1255	32	14	15	111	65	3	21	33	6297	262	106	9
Control	mCTRL0356	GCGTACCTATCGATAAACCA	2106	464	83	161	195	759	252	110	69	98	215	29	38	28	97	68	49	54	275	23	187	216	22	187	764	426	4	0	12	0	5	7	4	490	20	5	24	20	8	29	0	0	23	6	3	2	2
Control	mCTRL0357	ATATGAGCCCGACCTCTCGA	3076	1083	10	10	17	407	41	17	90	6	4	2046	25	7	82	78	17	65	9	7	398	244	23	249	5	396	6	6	4	1	27	22	4	56	53	24	10	517	3	77	8	0	15	2	3	14	1
Control	mCTRL0358	CGCGCCGAGGGCCTCGTTAC	6134	1154	3057	536	88	103	120	208	241	257	166	185	930	42	115	105	2240	311	3630	71	33	387	219	344	89	146	68	10	14	419	712	12	4	99	161	20	100	676	180	31	30	31	96	18	12	41	8
Control	mCTRL0359	CTCCGACGACTACGCAAGGA	1531	437	10	1195	655	31	4	9	14	8	42	13	1994	6	9	252	4	45	12	24	27	557	50	63	482	670	0	4	7	1	171	0	0	2	0	1	1	3	0	1	0	3	2	0	3	0	4
Control	mCTRL0360	TATCTCTGGATGCCGTCGGT	1813	320	21	5	2	142	44	12	5	1	32	130	6	37	6	48	46	7	11	16	9	3	14	40	3	22	1	1	0	22	11	2	0	2	0	19	2	4	197	0	0	10	6	45	5	0	3
Control	mCTRL0361	TTTCAGTTGTCGCGCGACTC	5671	1017	823	30	12	119	20	39	56	2	8	75	209	34	20	60	3299	269	121	10	104	20	143	13	42	31	71	4	78	7	1358	11	1	324	19	2	2	47	49	40	128	12	454	69	6	3	13
Control	mCTRL0362	AGTTTACGTGGTCCGATGTC	4206	642	16	19	6	38	56	7	36	62	358	14	28	3826	617	1	22	53	8	36	10	15	14	22	7	28	30	3	14	1	6	1	5	18	23	0	565	5	1	2	0	6	4	351	20	18	13
Control	mCTRL0363	GCGTGACGCGATCAAACGGT	1153	370	43	10	103	6	3	13	4	0	16	2	158	8	5	3	184	21	27	13	4	3	1	0	1	5	0	2	0	0	10	18	1	1	9	1	0	2	2	61	2	1	1326	1	41	0	7
Control	mCTRL0364	ACTAGCTCCATAACGTGTAC	1002	132	1	2	0	0	1	0	2	0	0	1	0	0	0	41	0	0	1	13	2	0	6	10	2	0	0	0	1	0	0	0	0	0	0	0	1	0	0	2	0	0	0	0	0	1	0
Control	mCTRL0365	CGCATAGTGTACCGTTGCGC	2940	712	155	31	345	5707	530	21	13616	33	86	8	251	26	786	24	219	466	2532	105	19	10	29	5	11	93	42	120	64	48	101	15	66	240	7	9	66	28268	65	46	59	878	1950	23	22	1288	3
Control	mCTRL0366	CCGCTTGGGCGCTATTAATT	2462	642	21	170	150	65	363	63	40	21	178	253	1137	239	153	98	74	17	662	1290	1051	184	1531	150	663	801	27885	3494	18	927	24	3967	954	3006	37	24	104	313	16	765	7	312	181	87	49	61	4
Control	mCTRL0367	GCTTCATTATTAACCGGCGT	1961	788	4199	14124	1791	8592	12799	8279	6411	11983	19468	20335	21001	30844	9882	61814	24758	16683	8207	11478	18692	19747	9695	6501	1617	8784	7674	16753	6804	5455	1286	4890	254	48055	10947	27726	6110	15989	2034	28449	34716	5499	1152	1541	4778	20124	2811
Control	mCTRL0368	TATACTCGCCTGTCACAGCG	4703	838	11	31	62	3	26	6	179	2	7	31	161	27	16	10	62	21	18	6	19	39	19	3	97	1678	10	12	4	3	7	4	4	10	10	3	2	698	7	9	2769	1	14	2	12	5	5
Control	mCTRL0369	ACGCTGTTCGTAACCGCGGG	2286	885	509	240	798	562	15928	165	977	225	2	157	134	387	256	549	1499	96	100	398	195	198	689	784	2320	230	6	5	24	34	87	390	12	786	10248	4	20	22	42	4	1	54	57	10	183	13	308
Control	mCTRL0370	AGACGTTGATTTACCGGCCA	3024	567	38	1	5	9	8	24	9	15	0	18	2	2	7	1	8	15	23	4	4	6	7	11	1	285	1	169	0	0	66	2	4	6	604	5	5	6	95	54528	38	45	2	21	6	38	3
Control	mCTRL0371	AACGGTCAAATCCGTGAGGG	272	45	0	1	10	0	0	0	0	1	7	0	21	0	0	0	9	1	148	0	0	0	0	0	0	12	0	0	0	0	0	2	0	0	0	0	0	0	0	0	0	0	0	0	0	0	0
Control	mCTRL0372	CATAGCAACGCCCAAACTCG	2568	645	9	62	5	12	0	0	10	267	0	1	0	55	6	69	59	15	4	6	4	40	6	822	49	8	0	0	1	3	0	1	1	1	3	0	0	0	5	1	154	0	0	2	4	0	1
Control	mCTRL0373	CGTCAATGTGTCCGGACGGT	2158	437	8	9	1703	2	26	3	27	98	86	1	3	35	3	24	5	156	77	8	14	2107	32	18	1480	10	0	0	14	1195	0	0	12	3	29	4	1	0	106	0	0	0	0	4	320	4	3
Control	mCTRL0374	ACTGTCCCATTGTACGACGG	3147	823	4549	11693	468	3951	14522	643	1086	13300	320	295	17703	413	185	3299	431	4533	211	343	393	2590	583	6273	3653	8591	19037	658	20671	220	7121	121	385	1570	6898	754	147	1261	78	14028	203	176	571	90	610	102	38
Control	mCTRL0375	CTATCGGCCCGCAGTGATGG	5613	1532	165	98	7253	54	64	36	1976	88	93	32	277	217	30	525	351	362	16	33	38	38	99	72	9	83	13	5	38	20	19	1	31	29	4961	77	98	57	106	13	96	10	86	3704	10	6	4
Control	mCTRL0376	GATCGAGTGACACCCACCCG	2200	617	9	848	60	2192	17	24	64	2	724	6	329	4	77	9	94	1	135	3	22	48	77	1445	29	9	18	1	215	4	11	3	4	12	37	1	0	106	3	1	16	2	6	4	3	5	31
Control	mCTRL0377	TCCGCGGCAACGTTTGGGTC	6830	2119	1988	748	1018	974	2567	3162	1056	860	55	1443	1082	574	911	5385	453	192	12609	3984	1047	2364	198	7870	451	468	8222	385	2063	9758	6732	3815	1282	192	27750	733	31356	121	2174	12233	42214	2201	275	1737	154	112	31
Control	mCTRL0378	ACTTGTATACGACGGCTAGA	1688	249	1	3	1	3	0	3	9	0	130	22	2	0	7	0	77	0	0	0	4	2	4	3	10	1	1	0	0	5	1	0	0	1	1	4	0	0	0	2	2	0	2	0	0	1	0
Control	mCTRL0379	TTCGACTGCGCACGCCATGA	6956	2172	909	3679	1126	2203	1056	863	1585	1426	2704	3822	2863	770	2790	7234	3116	9864	12746	823	341	5094	4452	2851	5596	347	142	98	325	1348	23268	371	758	257	2186	2157	357	206	4993	257	53	5689	75	2103	649	74	90
Control	mCTRL0380	AGCATGGAGTCAACGTCCGC	3172	476	10	45	0	12	16	0	1	2	0	7	59	0	13	5	1	1	3	10	11	6	26	4	5	0	5	1	5	1	1	1	0	2	1	0	0	2	6	3	0	0	8	3	2	1	1
Control	mCTRL0381	TGACTTGACACGTTCGATAT	3078	1482	681	2803	282	17152	719	261	316	930	805	1931	1122	423	767	177	1148	1626	214	299	118	1657	814	386	2348	859	155	188	2359	608	37	61	65	146	68	195	282	217	318	409	147	571	610	595	17	260	32
Control	mCTRL0382	CCGGACTTGTTATACTTGAT	2192	636	8193	5336	5739	5180	15463	3135	1187	25420	654	7959	10651	11255	18990	7273	569	266	1041	471	683	3939	6659	4389	18909	5689	12958	800	70594	4036	148	3966	155852	12271	3832	1367	48737	8289	822	10865	3628	282	13902	15810	1800	8542	213
Control	mCTRL0383	GTACCATGATAACCGTACTA	704	180	1	0	87	1	0	1	63	0	0	3	0	9	1	2	69	0	2	0	0	0	11	9	114	1	0	0	2	0	0	2	61	0	4	1	2	0	0	1	0	0	5	1	1	0	0
Control	mCTRL0384	CACCGCTGCCCTAGTACCGG	5508	2108	453	781	818	2965	385	788	974	1222	282	662	622	421	1738	545	702	99	227	107	46	176	164	601	321	2156	325	93	4475	619	158	1588	72	281	310	151	112	752	3376	518	21	262	652	5689	544	206	30
Control	mCTRL0385	GGATATTCGCGCGGTCTTCA	2486	427	13	4	2	10	2	1	210	16	6	3	1	1	19	44	0	1	2	12	1	2	25	13	1	1	0	1	8	15	0	2	2	15	0	12	3	2	5	0	0	966	4	2	0	3	2
Control	mCTRL0386	AGGCAGCCCGCGTTAGAGAT	1677	423	0	0	0	0	4	0	319	1	2	0	0	3	11	18	3	42	0	41	19	5	2	8	2	3	0	0	2	0	0	2	2	1	3	5	0	0	3	4	2	2	11	2	2	4	1
Control	mCTRL0387	TTCTCCATACCGTAACTCCG	6360	1541	2456	546	299	854	2319	696	2300	342	519	943	170	872	128	408	1566	857	814	293	877	7321	166	268	3616	1106	86	66	355	1591	360	3637	128	663	60	58	260	202	193	75	103	100	140	69	18	172	916
Control	mCTRL0388	ACCCGCATATGCCGCCTAAG	2706	633	3	21	0	6	113	6	7	7	689	24	51	0	3	11	10	5	4	18	2	2	7	7	2	49	1	0	0	1	2	0	18	0	5	3	0	6	1	0	21	1	5	3	6	3	2
Control	mCTRL0389	CGAAGTACACGGTTCTCTCG	2711	794	29	49	29	66	143	10	48	3	62	12	40	10	74	14	30	83	40	12	45	55	56	9	12	81	2	25	17	4	371	13	19	13	4	2	5	6	12	24	7	4	13	10	14	5	3
Control	mCTRL0390	CACAATACGCGGCAGAGGTC	2230	559	2	15	1	33	5	59	6	2	0	4	19	2	3	3	3	21	303	9	34	29	2	1	4	27	0	0	2	1	2	36	1	54	287	0	0	2	3	1	0	1	4	9	0	1	0
Control	mCTRL0391	TGAGACCAATGCCGCGGAAT	3300	1460	163	226	208	610	298	156	916	1179	338	1628	669	1146	246	2390	54	236	129	1178	26	430	561	432	2008	735	53	14	510	2093	607	781	19	778	267	139	136	457	184	52	27	55	452	231	14	37	73
Control	mCTRL0392	CTCGACCCAGTAGTAGACGG	1442	270	8	2	36	1619	5	1	0	19	0	0	13	9	4	2	1	22	5	0	5	1	8	2	0	1	0	1	62	3	16	7	0	3	0	5	0	14	0	30	0	1	0	1	1	0	1
Control	mCTRL0393	CGTACCGACAGTAGTCCAAG	1924	686	22	28	43	19	40	47	790	7	2570	3759	109	143	8	408	6	7	232	4167	8	33	283	9	21	20	21	1	39	9	4232	2278	87	165	1892	44	513	658	78	47	4271	155	48	266	13170	3	47
Control	mCTRL0394	AATTGTCTGATCGCGCCATA	2157	605	19	631	8	171	14	6	48	7	70	105	108	3176	180	849	18	35	40	13	16	12	18	18	87	109	6	3	15	4	3	4	14	20	80	13	23	2	4	4	9	8	56	6	41	8	10
Control	mCTRL0395	TTTAGTCAGACGAGCCGGAT	1576	221	1	5	2	2	0	1	50	6	2	16	1	6	1	4	9	27	1	2	1	22	7	2	3	0	0	1	0	1	0	0	2	1	1	16	1	3	24	7	0	2	58	2	4	1	5
Control	mCTRL0396	TGCGCGTCCTGTTATGACCG	5565	1817	114	2019	78	1638	817	966	2585	253	766	488	504	1685	282	89	84	410	2940	4977	92	798	6248	21	82	9147	73	14	167	6598	39	34	259	352	149	876	38	23	368	19	522	26	180	19644	37	255	1385
Control	mCTRL0397	CTTATCGATTTGGGTTCAAC	3505	1292	291	52	1554	147	373	158	75	14	2245	331	34	143	321	160	37	23	16	260	7	22	19	124	145	258	10	1128	153	3	29	161	7	5192	53	24	17	31	264	333	1922	7	20	10	114	14	19
Control	mCTRL0398	AACATGTTAAGTCGCGTTAT	2395	502	10	9	1	52	28	33	8	13	0	1	14	136	16	10	73	11	2	10	13	38	3	0	0	19	0	1	2	0	0	2	4	1	0	0	0	13	2	0	0	40	0	3	2	0	0
Control	mCTRL0399	TACGACATCGCATGGTAACG	1980	277	3	4	1	3	0	6	18	0	1	2	1	3	0	1	9	1	16	42	1	0	1	45	4	5	5	1	3	0	4	1	0	0	0	1	0	18	2	0	0	0	6	2	0	5	0
Control	mCTRL0400	CAGCTGACCGTTAATCGATA	2592	609	55	9	44	837	99	27	338	35	98	311	301	485	35	559	73	1921	9	57	8180	55	577	21	1233	6	9	15	4	1	4	21	101	14	3	11	0	7	112	13	413	3	7	13	10	69	1
Control	mCTRL0401	TACACGCCCTAAGCTAGTAA	2372	681	33	13	1	1	160	79	9	100	4	11	18	97	28	5	2	6	2	10	11	1	14	33	57	6	19	3	1	9	6	5	0	0	6	8	0	3	2	2	0	3	3	0	2	0	0
Control	mCTRL0402	CCGACTGCCGAGCTAGGCGT	1678	665	207	10	620	13	6	124	3	68	9	7	19	58	1	12	17	8	27	12	6	20	3	10	10	168	0	0	0	114	4	0	6	8	3	0	2	1	1	14	0	3	0	23	2	1	5
Control	mCTRL0403	GTTGCGGCGACCTAGATATC	2863	627	61	75	22	4	3	35	6	5	21	9	21	48	3	16	1145	45	10	5	5	208	30	41	4	2	5	0	3	2	2	2	3	5	25	2	1	8	83	7	1	3	2	7	3	1	0
Control	mCTRL0404	TAGACGTCCACCGACTCTGA	2927	732	31	742	4	135	173	67	53	3	5	22	327	6	555	38	19	6	116	3	11	128	12	49	341	109	16	23	7	3	16	2	1	10	8	43	1	7	4	4	3	3	135	5	4	3	11
Control	mCTRL0405	TCACGCACGACTAAGGGAAT	1628	850	1	262	15	11	27	7	4	0	32	26	16	22	33	9	250	2	50	32	60	12	11	7	42	53	6	863	8	264	7	7	5	0	6	4	2	319	1	10	4	2	109	20871	14	4	1
Control	mCTRL0406	GCTTATCGTTCCGCTACGAT	4237	1658	10	135	62	402	160	56	27	177	162	655	257	1030	148	335	141	57	85	1237	511	121	144	71	1079	60	31	0	109	522	153	18	2	9	10	20	146	7	5	7	24	9	8	127	7	17	39
Control	mCTRL0407	ACCGGTTCAGCCGCCGGAAC	2133	730	9	20	2	8	17	9	28	3	158	33	301	164	80	21	62	303	8	10	7	4	5	635	16	510	1	0	3	9	0	0	3	25	2	4	27	2	0	3	1	0	0	120	3	3	3
Control	mCTRL0408	CTACCCGTCTATTACGATCT	4433	849	17	63	0	37	42	4	92	18	66	14	118	33	4	16	53	0	8	18	5	0	9	34	30	3	5	3	155	1	3	4	4	9	3	5	0	10	6	1	14	25	3	8	24	4	2
Control	mCTRL0409	TGTCGCCGATGGTCAGTCGC	7125	2203	131	220	948	1434	225	104	372	844	77	405	93	120	704	36	112	1661	601	114	1762	6493	1091	3083	530	2761	7	328	10828	606	34	96	54	39	572	6	12	862	13	45	16	12	37	12	29	93	12
Control	mCTRL0410	CGGGCGGTAAGAGCTCTACG	1155	248	0	0	0	0	8	0	1	1	82	0	9	2	0	2	0	0	2	0	1	49	3	12	7	14	0	0	54	1	0	2	2	3	5	1	0	0	1	2	16	2	0	1	0	2	0
Control	mCTRL0411	GGCACCGTTCGGAAACCGAC	2087	487	9	52	2	176	262	2	11	0	33	4	0	11	469	3	11	23	190	8	30	31	29	22	15	12	2	0	6	1	9	42	72	1	10	2	0	1	17	11	5	0	3	2	0	1	1
Control	mCTRL0412	TCTCGAATAAATTTTCTCGC	2054	297	0	0	22	170	2	9	0	2	4	4	0	15	3	5	0	30	8	2	5	7	2	1	1	4	14	0	0	2	2	0	0	4	2	11	0	2	2	0	0	1	4	1	0	1	1
Control	mCTRL0413	GCATTCTTGAGCTCCGCGCC	5619	1577	105	25	153	44	50	65	30	43	1898	69	1140	83	154	2376	85	34	34	35	75	71	19	64	10	499	18	631	188	9	3753	9	18	59	1378	10	53	116	300	15	342	562	33	62	68	5496	269
Control	mCTRL0414	ATTCGGACCGTTATCTCACC	4613	1191	174	55	1448	105	66277	545	285	3845	31	229	707	59	10916	845	144	230	18	485	100	39	165	326	30	24	9	58	37	4238	30	1762	11381	1285	26	63	288	33	57	135	23587	209	16	254	18	15	13
Control	mCTRL0415	GTTCTTCAAAGACGGGCGGC	1054	223	1	0	0	56	2	36	20	28	1	5	0	29	1	0	3	1	1	2	1	0	30	1	0	3	0	0	0	0	0	0	0	1	0	0	0	0	7	0	0	16	0	0	0	1	0
Control	mCTRL0416	TTCCCCGCCCGTGCGGTCAT	7411	2625	481	851	5468	4403	1937	371	4388	112	1294	571	323	2452	328	2594	4438	730	3162	856	388	4738	496	6068	26512	1510	37	1730	49	860	78	178	47	1644	331	1528	263	1711	12029	1349	2228	826	390	757	224	49	453
Control	mCTRL0417	TAGTAGGTTGATCGCGTCGC	4439	1237	17	64	528	63	20	18	83	21	316	96	161	5	40	321	302	41	39	173	249	128	34	169	12	75	0	117	6	0	298	3	4	12	18	183	23	4	10	0	37	4	370	2	8	1	17
Control	mCTRL0418	CGCTCGGTGACGTATACACG	2800	936	86	73	1157	121	54	81	184	124	9	96	24	238	10	51	38	73	157	586	10	3	38	34	4	294	14	1	161	122	56	0	9	42	12	1	11	4	6	26	10	3	15	4	5	58	11
Control	mCTRL0419	ATTATAGCAGCCCCCCGAAT	1856	259	1	6	23	25	9	0	50	1	18	0	61	2	10	2366	7	9	5	10	10	50	30	0	1	29	8	0	4	4	2	7	0	234	2	3	2	0	1	6	0	12	0	11	11	1	1
Control	mCTRL0420	CGGTCAGTCGTCTTCCCGGA	3022	1632	6	61	64	21	187	40	84	10	13	13	163	196	79	148	55	51	40	39	173	20	552	108	1056	17	0	2	37	0	55	2	2	13	1	16	2	5	0	0	64	85	11	56	8	0	5
Control	mCTRL0421	TGGATCCGCTTCGCACGGCG	3062	1039	10	7	4	42	12	1	448	38	19	30	2756	57	191	19	18	16	62	106	9	5	12	4	20	71	24	1	26	3	51	3	2	246	7	5	5	58	1	33	3	2	56	4	4	7	4
Control	mCTRL0422	AAACCCCCGCGCGGAGCGTC	1587	179	0	0	13	0	0	0	0	0	0	1	0	4	0	0	0	0	1	1	0	0	4	0	0	110	0	0	0	0	1	0	0	0	1	0	1	4	0	0	0	0	0	1	2	0	1
Control	mCTRL0423	CATAGATCCGCGATTGTACG	1953	420	35	13	111	1486	1	56	148	39	21	143	45	2608	1850	70	74	156	12	158	10	7	527	9	48	308	50	97	210	166	82	424	1920	2134	27	377	350	20	1772	262	1011	18	1	8	5	16	395
Control	mCTRL0424	GTTTCAGGAACGACGGCGAG	1513	431	172	64	141	580	2298	6	97	2649	8	16	2494	407	119	1682	553	232	1378	809	92	34	3514	2015	4	261	3061	45	124	454	10	2913	13	57	270	1	17	33	82	578	0	3987	2	134	12	9	436
Control	mCTRL0425	ACCGTCTCTATTATACGGCA	1861	841	4594	9414	7411	1507	2625	941	4706	16226	2689	5432	462	475	23454	1945	2020	3823	327	209	4878	95714	18238	30682	4424	204	3457	1282	10671	963	6014	70	4415	1659	13792	4677	23315	2092	25927	4731	2058	134	32056	301	27997	175	3292
Control	mCTRL0426	TGTTCGCCCTCTCACGATTG	4517	1499	339	250	700	418	881	377	711	583	1004	1156	317	182	158	150	2469	138	177	464	355	516	777	1156	333	205	124	851	281	55	92	110	1087	310	452	62	93	125	296	13	59	50	133	110	129	52	90
Control	mCTRL0427	AACTAACTCACTACGCACGA	2340	448	1	4	15	21	140	4	387	1	1	12	44	4	12	10	10	2	77	6	4	14	10	43	4	54	39	4	7	11	0	3	8	2	3	1	1	5	13	0	15	8	9	657	7	0	2
Control	mCTRL0428	TCGCTCCGCTAGTAGTGGGT	2637	807	160	1744	134	6209	234	221	78	171	383	93	6213	584	2878	51	868	2654	21	352	7822	708	168	1313	86	6239	37	28	3718	106	842	916	14	207	1400	10	45	1078	17	1711	1	84	99	1280	84	5	9
Control	mCTRL0429	TCGGCGCAGCCTAATGTATA	1824	838	22	2005	18	32	78	5	21	6	3	18	149	37	36	93	97	4	3	85	67	8	3	7	1378	12	67	6	8	2	0	87	0	14	14	3	1	4	0	20	1	10	4	4	84	6	1510
Control	mCTRL0430	CAACCTGCCTAGCGACCCGC	5275	962	5	108	70	33	92	5	117	21	111	16	37	10	135	17	222	3	7	285	402	18	25	38	41	227	0	0	19	0	14	28	3	6	61	5	2	43	5	4	2	4	4	14	9	8	9
Control	mCTRL0431	GTCGGCTCATCGGAAAATAT	1216	317	23	1011	21	1237	90	544	64	304	3322	112	22	2226	3	24	6	2	5	6	5	44	14	3	0	51	45	2274	84	0	10	538	5	163	192	5006	11607	69	2	955	3	578	648	576	6795	10	23
Control	mCTRL0432	GACAGTTGACGCGACGGAGA	1139	382	0	9	40	15	0	18	7	0	98	4	13	1	4	1	23	2	6	4	5	2	3	1	6	6	0	0	0	3	1	2	0	3	0	9	0	6	0	0	0	0	0	1	12	0	0
Control	mCTRL0433	CCCTGATGTGCTATACGCGC	3654	1326	365	1682	109	692	1196	346	255	105	337	52	333	306	252	60	239	133	107	383	633	581	970	35	254	2516	80	11	333	26	7	122	11	19	287	52	49	467	94	55	2227	28	31	42	94	80	255
Control	mCTRL0434	TAACCCTTGATCAACCGATA	1771	549	29	91	138	320	231	325	5127	962	2148	696	50	550	157	23701	1210	91	75	175	3982	78	438	114	140	49	78	2	245	16	229	237	50	16	2500	203	57	253	10140	1790	475	22	518	149	11	52	82
Control	mCTRL0435	CTATTGGGAGCGGCCTCTCG	3253	849	120	20	43	21	22	191	3828	7	138	44	6	108	42	2	4	5	13252	93	9	90	25	155	3	13	25	0	3	400	30	0	42	5	1037	0	68	221	36	7	2	1	63	188	8	1	1
Control	mCTRL0436	GCTTATCGTCATGCGGGTGA	2653	938	9388	1155	110	233	9121	1091	2097	633	308	79560	234	7354	7978	1890	31074	1101	453	22122	1312	1242	1875	8752	2661	30803	89515	4333	61253	10626	137	4888	1963	23216	76	611	57	17863	4947	175	32629	3472	103	51	3421	24744	72
Control	mCTRL0437	TGATGCCGGTACCCGTAACT	4695	1669	65	4291	87	4673	640	2965	98	2104	32418	1207	200	19748	98	1101	271	103	523	93	414	457	97	288	220	396	920	13893	487	19	22	41	39	988	986	40325	95207	620	11	4547	64	3451	3505	2851	32147	47	166
Control	mCTRL0438	GGCGCTACTGTAATGACGGT	1014	257	8	0	2	14	265	1	0	1	2	3	2	13	1	13	0	0	2	18	7	0	1	1	14	0	3	1	1	1	1	0	0	3	44	1	1	1	1070	1	0	0	0	7	2	0	1
Control	mCTRL0439	ACGGATTGCTGACGCTATCA	2548	634	7	37	4	7	32	0	15	20	549	2	4	534	5	50	266	13	15	0	26	1	18	13	0	13	3	0	5	0	6	1	34	10	2	1	10	7	36	7	0	267	0	13	0	2	6
Control	mCTRL0440	TAATGCGAATGCGACCTCTC	4070	729	67	460	3	10	113	12	45	198	35	40	79	5394	91	53	14	7	362	101	34	12	20	228	13	110	0	4	44	4686	13	360	8	49	60	11	120	40	13	14	3265	603	23	37	98	35	18
Control	mCTRL0441	TTAACTGGGGGGACCGGACG	1489	243	38	13	1	17	3	1	23	0	1	2	47	10	50	30	0	0	3	14	1	2	5	35	0	0	1	1	0	93	587	3	0	0	1	0	0	0	2	3	0	2	11	2	0	7	0
Control	mCTRL0442	CGCAGAGTTCAAATCCGCGC	1335	474	59	54	0	141	55	2	9	7	2	10	16	2	4	3	4	18	16	8	4	2	5	6	1	7	0	0	0	2	0	0	0	7	4	0	0	0	0	1	0	1	292	3	0	0	0
Control	mCTRL0443	TGTTTATGCGGAACTTCCGC	4877	2397	154	234	1342	56	51	78	167	416	52690	2499	117	110	1555	13972	3549	21378	106	94	214	2458	3016	153	5529	130	18	82	112	26	22	143	31	762	153	14	15	21	22	32	11	59	7	17	356	8	72
Control	mCTRL0444	ACAGACCGAATAACCGACGA	1493	166	3	0	0	0	0	0	0	12	15	10	2	46	24	2	4	5	0	0	3	0	21	8	4	1	0	0	0	0	5	0	7	0	0	0	0	0	0	0	0	0	1	0	0	0	0
Control	mCTRL0445	TGACGCTAAGGCCCGCTAAC	4206	1282	200	219	327	111	519	158	152	89	201	491	181	86	74	202	947	130	300	192	95	306	92	119	205	635	53	135	307	113	957	34	200	110	672	383	45	160	463	63	10	24	33	143	1178	74	53
Control	mCTRL0446	ACTCGCGAAACCGTACATGA	1463	279	1	0	7	1	8	0	20	46	1	0	1	5	41	6	3	197	0	4	0	0	7	4	5	0	0	0	2	3	0	0	2	9	11	0	0	1	8	0	5	2	1	1	1	3	3
Control	mCTRL0447	ATAGGCGCACGGGCTACTCC	3835	1347	351	1433	13365	483	2557	656	4725	4871	2732	695	5727	507	1254	464	3474	1551	2675	4357	1452	7624	272	6122	54	558	68	410	25665	1817	455	2657	1477	798	563	844	97	6333	821	749	843	183	4416	2982	1348	683	198
Control	mCTRL0448	AGATTCTCGCGTAACCAGAG	762	74	1	0	0	4	0	0	1	0	9	0	0	0	0	3	4	0	7	0	0	2	0	0	2	0	0	0	0	1	0	0	1	0	0	0	0	0	0	0	1	9	0	0	1	2	0
Control	mCTRL0449	ACAATTCGGTTTATGCGCGT	2989	785	12	88	4	41	23	10	67	15	98	124	15	203	175	177	141	8	42	25	63	13	34	5	2	6	3	4	30	7	19	6	10	8	1	1	7	3	9	3	2	1	2	15	17	2	87
Control	mCTRL0450	CGGGTTATAGATAGTCGTCG	1570	379	6	7	13	15	24	10	25	25	2141	14	10	3	0	22	9	12	1	0	6	116	2	4	33	9	4	968	8	81	5	3	162	0	1	6	4	0	657	5	0	1	0	3	4	211	0
Control	mCTRL0451	AGGGTTAGGCTGACCCGCGA	1582	416	3	4	13	32	0	2	10	4	1	15	3	4	3	22	2	3	5	5	3	14	4	11	2	6	0	0	3	1	10	0	3	0	0	0	2	0	0	0	0	3	7	7	9	4	0
Control	mCTRL0452	AGCTATCCCCACGTTCGCGG	3433	1051	26	424	65	92	12	43	49	143	71	244	888	160	2116	84	562	24	735	185	12	38	49	135	59	309	7	14	1	162	5	21	81	1785	42	6	23	165	16	42	30	333	78	394	7	28	491
Control	mCTRL0453	ATCATGCCTTCGCATTAACC	3285	1268	75	2068	4	49	34	42	50	94	107	13	125	42	197	28	63	12	4	165	53	9	51	472	7	47	1	31	31	6	34	0	4	26	13	11	3	143	4	141	0	7	2	9	51	12	18
Control	mCTRL0454	TGGGTCCTAAACGCGGTTCA	2305	1532	15	731	586	74	80	280	89	190	120	34	1220	38	144	18772	318	113	96	465	1117	267	290	216	1103	605	14	287	43	13	27	2304	21	79	16	131	15	33	3695	1010	38	361	35	42	812	145	113
Control	mCTRL0455	CATACTGTTATCGACCCGCA	3065	686	4	21	75	97	24	25	70	47	16	45	71	15	9	34	87	34	44	7	37	37	33	97	41	92	4	0	1	0	1	3	10	0	66	6	0	6	2	0	0	3	9	8	5	2	26
Control	mCTRL0456	TGAGCGCTTTCCCGATCCGG	3329	1024	4	241	12	5	81	4	9	4	411	4	79	106	18	63	15	4	11	17	6	4	39	2	48	111	7	2	6	9	2	0	1	6	0	3	3	3	25	7	3	0	6	42	3	2	3
Control	mCTRL0457	GCCTTCCTCGCAGACCCGAC	5010	1266	11	20	3253	36	116	64	107	48	360	23	216	450	29	394	315	36	3486	39	37	63	149	19	67	53	534	8	23	8	37	16	8	175	47	7	65	8	21	65	9778	51	11	9	21	7	3
Control	mCTRL0458	CCCTTAAAGTGACGGACGAA	855	373	3	0	0	6	66	3	23	2	313	11	38	4	1	60	3	8	9	848	702	1	0	2	30	9	0	0	0	216	1	0	0	2	1	2	1	55	0	0	0	1	383	4	0	7	371
Control	mCTRL0459	TGGTTCGACCAACATGGTTC	2703	1018	168	138	35	10	325	15	33	22	2	380	111	1	2	8	17	55	186	44	163	13	4	12	36	14	67	5	27	261	1	0	2	2	1	1	12	2	299	2	8	1	7	18	3	70	7
Control	mCTRL0460	TGGGCCATAGTGGCGCGTGA	2167	703	2	15	28	1	9	5	0	14	0	2	225	6	2	24	11	4	9	3	15	18	16	20	8	339	7	3	5	0	1	0	0	0	0	74	0	8	0	0	3	1	3	39	4	2	0
Control	mCTRL0461	TCATATTAGACAATCTCCGC	3242	1097	169	76	133	468	421	962	36	273	5623	27	142	88	490	175	321	286	382	205	40	102	636	1369	342	481	4	6	22	8	18	18	0	30	33	15	11	17	48	1	0	1	36	25	37	6	3
Control	mCTRL0462	TAGCCGAGTTCACGCCAGTA	2562	980	80	115	69	28	259	52	27	36	330	45	41	11	154	40	27	22	19	33	1853	119	46	94	32	37	31	23	42	44	8	21	14	27	158	8	8523	3302	17	8	3	43	21	7	5	6	611
Control	mCTRL0463	ACCAGGCGCGGACCGCACAT	3351	1137	148	66	63	24	20	28	2	10	726	12	53	83	112	42	1017	18	18	144	7	3	86	342	338	485	7	6	9	225	1	34	26	2126	31	8	39	10	12	18	243	3	29	131	191	111	1
Control	mCTRL0464	GCGCGAGTGCCAAACGAGTG	1437	447	3	76	3	19	10	35	2	1	0	4	16	7	9	24	5	42	40	2737	6	39	7	29	18	321	0	0	1	21	4	5	13	4	14	36	0	4	1	9	0	0	2	11	3	2	0
Control	mCTRL0465	AACGGCTGCGCCCGCGGCAA	1758	607	1	46	33	220	23	15	5	20	11	4	141	1	27	16	198	56	28	139	5	105	83	225	26	75	12	3	48	4	20	43	11	3	19	67	2	87	2	2	10	0	2	11	1	92	26
Control	mCTRL0466	ACGGTCGAGCACGGTTATGA	2135	870	85	28	335	561	2451	1016	24	27	31	604	14	4274	40	19	655	123	15	866	986	68	526	54	3	798	151	1520	121	9	189	1380	175	3252	43	3	33	2411	3	6	45	13	1691	1124	2	235	9
Control	mCTRL0467	TCATGTTGCGTCGTCCGTTA	4002	1160	61	20	87	786	157	21	284	122	40	2519	77	449	36	50	149	104	544	222	9106	23	48	128	1486	82	0	4	163	97	6	5	2	16	27	4	4	20	3	36	0	4	58	9	10	18	42
Control	mCTRL0468	CGCTCCGTATCCTCTCATAA	3540	1687	35	942	442	100	706	829	154	123	468	73	498	607	85	98	142	252	567	418	19	228	1995	662	8	223	7	153	41	134	159	76	43	12	55	13	123	17	1113	65	1	13	20	20	6	14	18
Control	mCTRL0469	AAACGAGGCTGTTCGTACAC	2246	625	8	40	0	87	20	4	856	9	3	6	1	31	9	1740	49	4	19	58	16	4	42	78	589	6	24	2	0	155	7	1	0	30	7	2	4	0	7	14	0	7	0	20	5	8	28
Control	mCTRL0470	CACGTATACTTAGGTCAGCG	1755	540	5	311	4	0	1485	141	70	13	14	43	23	853	1	83	15	0	4	7	4	19	6	10	24	219	63	1	18	0	24	1	27	15	5	2	8	0	1	14	2	1	346	5	107	1	2
Control	mCTRL0471	ATCGAGCACCGAGTTGTGAT	2824	2142	452	1467	782	305	4293	108	2443	226	1374	222	3963	409	3974	645	737	2163	128	657	16424	2497	1115	215	96	1089	287	8537	410	47	236	50	685	3023	10239	110	64	33	932	592	7	61	142	26	95	114	336
Control	mCTRL0472	TCACTTTAAGCACCCCGCGC	4792	1238	1	153	29	111	40	20	549	15	83	257	14	45	4225	267	62	241	2	17	106	118	50	97	80	11	0	4	6	10	8	1	0	2	4	6	28	1	8	668	10	0	4	6	7	4	240
Control	mCTRL0473	CTACTTGTGACGACCTCGCG	4551	1060	15	148	1239	84	1414	223	99	12	624	183	301	998	21	102	328	95	320	12	108	34	100	28	14	3	90	2	5	16	47	11	11	103	27	3	30	2	61	59	33	4	349	83	94	4	142
Control	mCTRL0474	CTACGGATAGGCGCGGGTGA	1644	521	3	45	1	11	19	7	14	14	7	0	26	15	5	7	1653	6	16	18	107	1	1	40	98	5	2	0	0	4	0	14	5	1	11	3	1	23	1	1	2	2	21	1	1	5	1
Control	mCTRL0475	GCTTACCTACTCCGCCCCGC	6266	1849	947	1922	541	289	121	365	1006	149	78	326	189	337	86	104	208	301	242	1432	219	125	154	318	213	971	22	11	91	26	27	2507	37	2481	106	86	101	27	22	1159	10555	175	282	196	9	139	5228
Control	mCTRL0476	TAACACGCACTCACGTCCGG	3743	978	105	17	27	34	49	4	37	4	10	50	33	5	8	92	14	447	23	8	102	18	47	592	23	330	26	0	4	3	0	7	1	104	7	1	170	4	3	2	1	5	0	8	3	19	0
Control	mCTRL0477	ACTCACCTCGCACGATCGTA	2513	1161	32	781	185	20	135	311	187	151	120	183	188	187	70	327	23	364	853	43	124	188	39	172	85	235	24	15	22	343	20	10	4	208	262	23	1088	50	231	31	28	300	10	8	7	37	26
Control	mCTRL0478	ACACCCGTGTATGCACCGGG	2269	692	88	1657	1100	142	366	166	593	66	54	74	1003	845	51	451	165	1109	431	228	204	806	1813	358	571	512	2049	53	442	519	3085	29	123	360	444	260	89	141	504	304	351	75	35	456	43	68	1454
Control	mCTRL0479	GCATAACGGCCGAGCACCAC	2475	836	5	54	57	5	9	28	234	87	367	2	41	5	556	8	38	83	38	29	28	24	449	13	63	45	3	1	5	5	1	111	2	88	7	2	28	11	26	48	79	16	97	48	18	1	3
Control	mCTRL0480	CCAGCGGACGGCGAACTCCA	1427	445	114	387	481	789	347	494	826	145	93	87	137	376	1036	90	187	164	457	187	2124	125	116	113	678	216	115	0	56	74	32	89	2	23	32	11	65	72	17	40	47	366	104	35	2	12	7
Control	mCTRL0481	TGACCCTCTTAATCTCCGGT	2748	1407	372	1370	270	1662	1501	6262	228	1218	1775	481	317	612	39	949	6223	80	99	319	487	1053	517	21139	1200	51	95	30	328	485	371	75	597	72	1428	227	1243	6618	7003	335	10	1662	4659	62	34	30	1408
Control	mCTRL0482	CCCTAAACCATAGTTTCGCC	2064	501	12	20	0	1	1	6	17	0	2	0	4	0	22	3	7	21	29	3	6	9	1	0	11	3	0	1	11	26	2	0	0	2	3	94	59	0	5	1	264	1	16	3	3	0	1
Control	mCTRL0483	CCCTAGCTCGGTTAGAGAAT	1260	271	12	1	2	17	14	1	6	0	5	12	22	1	0	2	7	1	19	46	1	2	4	0	0	13	1	1	2	3	3	8	0	1	60	2	1	0	3	0	0	3	1	1	0	0	2
Control	mCTRL0484	GAATTGAGCCGCAACTCGGC	1643	313	0	4	1	2	29	0	0	1	0	2	0	7	7	14	3	2	3	62	7	3	27	1	0	14	0	1	1	3	0	2	0	1	0	0	0	3	0	0	0	1	2	4	3	3	0
Control	mCTRL0485	TGCTTAGGGCCCTTCGGCGG	4427	1339	10	143	34	86	84	22	6280	16	725	23	755	43	38	15	156	24	19	41	17	12	13	15	8	287	17	0	23	4	5	13	4	4	6	314	15	60	506	4	2	6	56	54	7	106	14
Control	mCTRL0486	TCTCCGGGCCGTGTTAGACC	3108	1071	23	12	30	427	122	43	87	518	46	13	19	19	0	18	31	5	12	18	13	5	2	17	44	1697	3	1	13	30	9	3	0	10	40	4	172	50	12	1	7	54	50	4	4	46	9
Control	mCTRL0487	ATCACACGTTAAACGGGGCG	1714	225	10	18	10	5	22	7	48	80	0	39	28	20	6	51	0	1	19	35	1	1	4	13	1	59	1	0	0	31	6	46	0	0	208	0	13	7	3	0	1	2	99	77	2	1	4
Control	mCTRL0488	GATCCCCTACGCTTCAACCT	4061	1686	568	1893	1807	3993	6479	907	3777	1405	3152	2209	1437	3261	1250	2343	7683	1375	1142	1862	2483	6149	3135	1893	4385	2086	4754	1356	904	944	1154	1538	907	3462	4826	1572	487	677	4409	1264	3225	856	5794	901	1109	2109	6104
Control	mCTRL0489	TTATTTACGCGCTGAACTTG	2703	568	51	74	104	12	14	26	83	32	94	7	183	27	44	17	11	211	7	45	35	6	27	14	63	24	5	10	3	3	3	3	15	26	15	0	0	7	1	305	8	192	145	88	22	6	0
Control	mCTRL0490	ACCGTTGTTTCCGTCGAAAC	2270	413	37	0	11	10	10	14	2	90	9	1	5	3	1	14	45	1	16	623	17	20	3	1	0	12	62	2	12	619	1	22	4	1	3	129	0	31	0	0	13	5	3	3	1	1	1
Control	mCTRL0491	CGAGACGAATCCATCATGCG	1557	312	210	170	135	5	30	116	5	31	33	548	25	141	1	159	5	7	56	11	14	2	12	2	1	12	40	0	18	1	0	4	3	3	519	8	10	54	45	18	0	32	1	28	6	6	17
Control	mCTRL0492	ATATGCTCGACCCATCGTCC	2982	694	7	24	1	81	4	6	4	24	161	148	0	7	4	24	29	37	34	23	62	3	30	132	2	68	2	1	3	329	1	4	0	2	3	704	0	3	4	2	0	1	1	4	1	22	12
Control	mCTRL0493	AACCTCGTCTCATGTACGAA	1552	337	0	20	0	0	0	2	5	1	3	1	6	400	4	24	0	4	30	1	33	10	0	55	0	11	1	0	0	0	3	0	10	0	0	0	215	0	3	0	14	0	0	1	1	2	0
Control	mCTRL0494	AATTTTTTCGGAATCTAGCG	738	131	0	0	6	0	0	0	3	0	1	1	0	1	0	0	0	0	3	2	0	57	2	1	0	2	0	0	0	0	0	0	1	0	1	0	1	1	0	0	0	0	0	0	0	0	3
Control	mCTRL0495	AGCGAGTGTCCGTGACGTTC	3782	1193	848	11872	460	4860	1207	3049	675	1257	544	2523	6141	27374	490	584	8115	13656	3266	1670	21851	445	487	6249	1053	37793	4307	60015	9713	208	124	5504	472	5789	1697	193	296	1288	993	4017	60	1632	5679	678	7251	2533	1340
Control	mCTRL0496	AACGTCACCAACCTCGATCC	3293	1040	224	6	0	64	49	5	30	8	3	4	9	16	25	625	5	19	6	3	6	58	19	160	32	71	4	0	3	0	6	1	1	3	6	2	3	1	2	1	15	426	4	26	7	1	0
Control	mCTRL0497	GTCCTAGATCCTATCGGGAG	2064	795	290	3	54	56	2	0	18	0	10	1	27	55	30	10	3	71	8	6	4	4	6	9	19	0	3	0	4	3	1	423	2	6	6	0	4	11	1	0	3	11	3	3	1	1	5
Control	mCTRL0498	CATATACTCTTGCGCTAGAC	1881	240	13	120	2	3	110	20	1	6	0	23	0	2	5	0	5	6	4	1	60	20	1	0	4	3	0	0	28	1	6	1	0	4	5	7	0	0	2	0	0	2	3	0	1	0	2
Control	mCTRL0499	ACGTCGATGCTTATCCGTCT	3703	690	0	7	32	11	436	12	110	4	11	19	876	2	56	120	5	5	1	3	64	2	6	1	49	27	21	0	9	15	6	2	0	6	5	0	1	2	0	0	0	1	3	5	4	2	1
Control	mCTRL0500	CCGCGCATTAACGATCAGTA	2915	1164	140	46	125	24012	1490	44	142	9	29	342	31	104	5632	402	137	138	222	431	107	48	4757	504	356	32	6	10	150	44	11	39	16	5	52	13	204	185	331	751	9	21	11	8	235	58	9
Control	mCTRL0501	CCTATTAGTCCGGTTTAGTC	2873	678	2	24	6	2	196	4	27	4	70	1	103	391	101	13	147	58	5	28	14	180	19	12	7	513	6	0	6	2	14	0	2	3	5	8	33	2	10	6	4	5	1	1	3	2	3
Control	mCTRL0502	ACCTCGTGCAAATCGGTGGC	3113	708	1	2	32	9	181	371	46	67	4	8	6	10	12	52	8	4	6	25	8	10	1	16	33	10	1	0	1	0	4	0	0	3	6	2	186	6	2	42	1	0	10	28	1995	23	90
Control	mCTRL0503	CACGCAGGAGCGGCGACACT	1848	974	46	17	15	20	418	43	38	45	17	49	1361	316	37	36	78	63	1093	19	57	23	11	23	23	26	2	11	9	8	31	5	2	426	39	274	9	1	6	12	5	0	195	11	6	3	8
Control	mCTRL0504	GTCGGCCGCTTAACCCTTTC	4519	1210	14	10	303	81	7	20	91	19	45	54	499	5	40	154	22	1803	167	36	10	129	111	408	72	160	2	7	10	15	22	1	12	17	7	9	35	6	7	44	45	7	126	13	5	2	28
Control	mCTRL0505	TGATCAACGTCGGTGGACGG	2680	1081	4	117	30	122	355	487	346	17	15	5	32	23	25	66	42	40	300	7	10	16	103	89	18	193	6	5	425	5	257	22	1	556	5	8	4	12	201	14	14	17	126	9	4	8	66
Control	mCTRL0506	GAACCACGAGCGAGCGTATA	1049	230	0	0	1	1	0	6	0	0	125	3	16	4	33	4	38	4	6	7	3	0	5	1	3	0	9	0	1	2	3	36	0	31	0	1	0	0	1	0	18	2	1	1	2	0	10
Control	mCTRL0507	GAACCCGGGAAACACGTCCG	1450	451	1	4	2	47	802	3	1	42	1	7	0	168	58	34	9	10	17	29	28	1	30	97	16	2	0	1	28	0	0	0	26	2	2	3	0	0	4	45	0	0	24	138	1	7	32
Control	mCTRL0508	GGAAACGTTACATTCGACGC	1560	284	1	22	317	4	145	0	9	6	600	108	2	14	121	3	153	59	11	3	50	15	7	1	79	4	0	0	3	0	0	3	2	1	1	6	0	0	0	0	0	0	0	1	4	2	0
Control	mCTRL0509	AATAGGAACTCCGCACCCGA	1634	559	3	1	18	19	135	41	2	3	49	11	7	2	15	67	7	3	3	15	5	58	17	23	34	2	7	86	1	0	5	1	14	14	5	17	129	10	5	1	0	2	7	8	1	0	5
Control	mCTRL0510	GTAGTGCGTGTGATGTCGGG	2642	727	14	0	12	565	295	6	1	19	1	4	3	17	76	15	67	191	12	9	7	11	10	1	5	3	27	0	1	2	2	0	53	0	0	4	16	12	191	49	24	1	5	1	2	5	2
Control	mCTRL0511	TTTGACATTTTCGTCTCGCG	3967	1911	1453	115	151	533	661	166	69	38	158	142	253	126	940	661	481	674	12903	133	166	36	350	385	55	269	81	16	58	502	5	93	35	27	196	12	17	96	740	14	169	16	141	156	4	26	45
Control	mCTRL0512	AGGTCCGCTGGCGCAATGGG	2314	1040	606	11292	6413	5976	10882	1597	2539	2747	14246	1663	4597	4612	4239	5217	9493	5357	13787	33679	24781	15041	3515	2123	991	9475	1859	36638	13483	9869	2568	8525	1644	16826	1730	986	5788	19540	252	3529	117	4697	1230	176	615	3371	49
Control	mCTRL0513	CCGCCCGGGTGTGAGTTGAG	2224	860	6	18	9	10	245	64	0	64	55	11	28	39	36	6	131	23	7	5	20	58	4	2	4	5	8	251	0	0	4	74	2	6	3	3	0	5	27	14	6	8	14	6	22	7	1809
Control	mCTRL0514	GCCGAGAGGCGTAAGCGCGA	1754	477	3	49	161	4	3	1	7	7	26	19	15	3	3	2	66	19	3	2	5	2	2	17	117	2	24	0	0	0	3	0	32	0	0	3	0	1	0	0	0	13	7	5	1	4	0
Control	mCTRL0515	TAATTCGCAACTCGGATCAT	2992	738	20	29	246	18	234	136	30	17	117	57	42	51	99	859	14	119	95	21	25	10	15	44	64	4	21	13	59	56	2	7	5	4	32	12	13	15	1755	57	1	6	95	6	3	30	4
Control	mCTRL0516	TAAGACTGGGTGTCCCGCGT	2489	602	13	222	14	79	101	0	50	13	242	5	27	46	145	123	10	161	901	30	9	30	8	1477	60	51	23	2	89	18	0	1	28	17	16	1	19	36	6	8	7	38	22	433	9	23	41
Control	mCTRL0517	TTACGCAAAGCTGCGATGAG	1992	425	1	24	0	76	0	3	24	0	8	12	4	6	30	5	24	2	6	2	67	29	9	39	0	10	25	8	1	0	0	0	2	3	0	2	2	0	5	0	5	1	4	2	1	4	73
Control	mCTRL0518	GGACACTCGCCGACCCCACT	2580	772	24	217	967	77	168	168	124	690	761	146	498	90	67	1491	4541	709	335	125	3064	457	363	287	7	59	148	18652	71	343	236	11	200	372	33	150	24	15	658	705	114	2	345	1961	63	607	63
Control	mCTRL0519	TACGTCTGCGCAAATAGAAT	1522	525	3	0	17	2	37	4	1	2	3	5	11	0	11	16	465	40	13	3	37	6	9	16	12	64	14	0	0	1	7	1	37	21	8	0	2	1	6	2	6	47	125	3	4	1	7
Control	mCTRL0520	ATACGCGTGATGACCTTATG	3748	794	8	29	107	46	10	8	100	0	35	27	13	13	12	124	33	11	12	5	4	7	11	14	3	23	2	4	2	0	0	1	1	0	9	42	13	3	6	8	4	4	8	7	3	0	2
Control	mCTRL0521	CGCGCGACTGCAGCTAATCT	3275	1080	45	108	11254	1175	75	168	372	155	92	463	71	33	116	524	582	55	95	1137	1683	38	142	7146	442	1244	10	11	131	51	106	286	15	26	22	452	10	3512	170	265	144	457	1272	35	25	13	70
Control	mCTRL0522	ACTTCCCGCGGTTCCGTTGA	4415	1136	27	768	701	192	237	119	937	14	169	235	1899	37	661	50	63	73	36	58	395	44	65	222	682	672	2	6	17	7	5	27	23	19	62	23	6	152	1	26	9	156	83	190	7	0	13
Control	mCTRL0523	TTATGACCTCGATGCGACAT	3049	831	149	170	61	71	74	30	30	5	9	14	6	4	90	41	54	131	11	30	16	11	7	39	145	155	0	4	36	37	96	5	1	377	4	1	6	3	106	6	18	4	47	1	10	0	6
Control	mCTRL0524	TGACGCGCCTCGGACCAACC	3896	916	1282	415	1635	482	1092	190	5032	348	78	215	403	1364	37	132	300	1859	2898	72	173	1823	2414	2241	41	392	1679	39	31	322	2174	225	25	168	39	101	562	58	17	31	38	225	221	1126	13	23	527
Control	mCTRL0525	TATCCCGATCCGGAAACTAG	1433	418	1	0	0	13	0	1	15	0	0	24	0	11	0	2	4	2	4	135	3	2	2	4	7	20	0	2	0	0	0	0	2	0	0	2	0	3	2	0	1	0	3	2	1	0	0
Control	mCTRL0526	AGTACACTACATCGACTTCG	1630	588	20	30	3	440	22	31	50	5	250	20	199	3	6	259	17	3	19	4	12	4	27	564	38	38	10	2	0	5	5	0	1	2	0	1	1	6	4	6	4	0	0	12	10	3	1656
Control	mCTRL0527	TTCCAGTATACCGAATTCGC	3538	1030	83	4094	1865	184	3654	30	138	297	31	133	4590	266	1300	9	1215	8	51	702	58479	67	521	29	52	8	81	12761	58	2008	1948	5217	29	2486	413	335	1164	211	6810	1496	1403	858	237	466	1715	7736	284
Control	mCTRL0528	CCCGGCAGACTAACTAGCGC	1194	530	0	0	1	0	0	6	0	6	5	0	1	2	3	1	3	2	0	2	2	3	1	1	6	0	0	0	0	0	0	0	0	0	0	0	1	0	0	0	11	0	0	4	1	0	0
Control	mCTRL0529	GCAACGGACAGTCATCGAAC	1337	369	10	0	0	6	2	5	0	3	92	7	19	5	10	6	19	12	1	5	183	15	1	1	2	0	0	0	0	0	4	2	1	2	9	2	0	2	11	0	0	3	8	1	1	1	32
Control	mCTRL0530	GCTAGCGTTCAGCCCGATGT	2221	1105	32	3	62	24	410	306	1434	464	218	52	10	0	205	129	30	46	13	3	31	10	1	13	46	529	5	0	2	0	7	5	3	76	8	0	0	1	17	41	0	2	3	4	8	1	11
Control	mCTRL0531	TATGAACTAGGCGTAAACGG	1091	336	10	3	3	16	3	14	20	4	65	2	64	0	94	14	155	2	13	2	8	3	206	24	7	0	181	7	0	29	3	2	0	2	10	0	2	4	5	5	89	2	2	6	2	3	0
Control	mCTRL0532	CGCGCGGATATTTAAACTTC	1306	373	18	6	18	6	69	15	149	3	306	10	20	17	141	119	18	17	121	0	1	3	1	5	5	9	92	2	0	0	15	6	0	73	888	15	2	0	28	20	0	0	1	6	1	8	4
Control	mCTRL0533	AAGCAGCGACTACTCGACGC	2080	714	73	39	73	12	6	14	40	10	31	13	91	15	6	49	8	234	24	10	16	7	34	290	11	21	3	0	2	28	211	0	1	11	22	21	3	9	15	19	6	4	1	3	3	6	6
Control	mCTRL0534	CCCCTATAGGCGCGCTAAGG	1259	762	3	57	0	1	8	59	4	13	34	16	44	58	1	5	3	2	12	22	19	24	109	18	2	205	0	0	2	0	1	4	1	3	5	2	4	0	1	30	0	11	114	7	4	0	32
Control	mCTRL0535	CCGAGATGGCTCGGATAGAC	2268	737	14	17	122	38	243	76	132	221	80	17	31	256	69	22	33	63	2	21	79	36	34	94	39	20	0	0	106	5	17	4	24	29	17	20	8	5	5	6	12	1	2	22	6	9	106
Control	mCTRL0536	AGCACGCGCACAAGAGCCGC	2220	935	83	29	1852	58	1241	1150	1608	243	4592	163	17	126	866	21	1949	332	193	224	758	8	524	22	18	487	39	10	26	105	6	4	223	6	19	76	0	31	3	3	11	14	19	15	8	2	2
Control	mCTRL0537	TCGTAAAGTCGCAGCGACGT	1686	631	27	165	183	70	16	32	12	144	8	6	345	963	11	3	201	197	3	68	40	16	19	162	22	46	0	4	6	8	1	14	0	2	119	0	226	18	10930	34	0	4	6	167	305	197	0
Control	mCTRL0538	GTCTAACATCGGCGCACGTG	3605	802	19	20	165	19	79	7	14	36	15	10	6	835	93	54	193	20	477	22	39	5	79	20	0	17	614	10	13	0	3	3	8	36	2	1	20	28	2	5	76	2865	7	155	12	2	106
Control	mCTRL0539	TTCAACGACGGAAGACGCGC	2426	675	10	66	2	47	8	35	127	12	59	6	83	39	138	187	549	80	51	595	55	16	1160	158	13	0	11	0	0	0	34	4	7	6	19	1	1	35	1	21	24	104	33	6	2	0	4
Control	mCTRL0540	CGCTCGGTAAGGTCGATTGG	3794	2127	85	922	174	1105	1053	104	599	91	838	68	1454	428	192	2063	164	7787	156	149	280	1143	37	68	1482	7341	1289	21	15	742	52	19	120	82	211	107	219	8	42	24	26	147	94	146	280	11	13
Control	mCTRL0541	TAGGGGTGCGCATTAGACTA	1676	1010	4	6	81	25	43	138	507	253	9	13	5	6	74	49	61	2	162	378	11	26	16	646	13	13	0	2	24	3	4	3	5	3	7	2	7	0	0	2	0	4	47	4	3	15	4
Control	mCTRL0542	GCCCGACCTCCACGTAAATC	2517	1272	19	23	104	162	105	1077	62	48	18	44	23	23	284	469	40	410	129	75	428	35	551	25	36	28	14	3	6	20	2	11	13	123	21	7	2	4	132	12	5	13	11	6	6	6	4
Control	mCTRL0543	TATGAAACATCTCGGCGACG	1551	160	1	3	1	24	411	7	27	1	11	5	0	2	0	3	44	9	243	0	3	2	3	6	3	6	0	0	0	0	0	5	1	0	1	0	0	16	0	127	0	0	0	3	0	3	1
Control	mCTRL0544	CTGCTTGAACGCCTAGACGG	2826	722	39	39	35	62	144	15	23	9	233	81	9	148	108	250	4	160	84	11	85	25	903	50	265	17	45	5	50	301	17	76	1	41	14	3	1	15	14	1	0	10	43	11	4	7	181
Control	mCTRL0545	GGGCCGGCACTCTGTCGGAC	2022	730	2	24	20	5	34	56	75	885	21	5	16	29	5	35	6	132	12	6	12	228	4	8	57	30	56	11	25	0	4	3	5	37	5	83	7	0	50	24	0	0	67	7	2	49	19
Control	mCTRL0546	GCCGACCAACGATGACCACG	2191	728	26	7	74	36	528	42	46	2	10	21	12	1110	82	298	6	25	1880	23	4	8	17	18	50	8	6	2	5	3	1	2	0	12	23	1	2	8	4	9	1	4	37	2	127	84	54
Control	mCTRL0547	ATCGCGGCGCGTTAAGGCAG	3133	1008	241	766	1002	1010	433	235	1238	53	52	575	226	598	2064	1416	300	154	516	2011	146	425	52	2949	245	1965	450	76	38	55	15	18	181	612	283	891	380	64	307	188	205	518	591	75	13	70	15
Control	mCTRL0548	CGACGGTTGTGCTGAGGCTT	4856	992	16	38	17	1406	208	73	83	14	337	6099	15	31	71	11056	102	184	79	58	32	25	1047	62	322	25	25	1	4	381	11	4106	46	104	711	9	16	67	2118	54	1	5	1665	97	128	5335	122
Control	mCTRL0549	CGGATCCTCCCGTACTATCC	6957	1528	12	4	36	58	375	6	71	27	8	506	119	30	19	1070	40	39	59	20	65	8	26	29	109	301	26	7	202	200	10	0	126	32	44	12	2	10	7	16	38	279	152	17	5	5	17
Control	mCTRL0550	CCATTAGTACGAACATTGCG	2507	1297	6	2	10	298	33	191	370	21	98	11	36	89	20	184	74	6	24	3	48	385	64	4	8	8	48	4	154	2	18	17	13	35	1235	6	2	7	2	209	28	50	424	8	7	5	2
Control	mCTRL0551	GCTCATACTGATGAACGTCC	3131	408	1	19	1	36	7	45	28	0	5	1	107	11	2	15	4	38	2	3	277	5	45	18	2	0	0	1	5	0	14	0	7	7	2	1	0	0	4	9	84	0	5	17	1	5	1
Control	mCTRL0552	GCCGAATCGCGTTATTCCAA	3476	834	24	144	376	68	77	63	27	57	442	11	97	14	4	54	12	428	53	56	34	82	40	111	10	91	51	0	4	63	1	7	13	2	208	25	0	8	4	8	470	3	11	4	2	15	6
Control	mCTRL0553	CAAGGATCGTGCCGTGATTT	5369	1243	14	378	151	100	112	970	10	37	161	36	62	103	39	4	73	494	166	280	4	42	26	40	84	29	6937	68	19	74	438	881	18	762	5	2	26	53	16	6	3	151	21	55	24	27	16
Control	mCTRL0554	GTTAATATTGTGGCCCGCAC	3952	675	1	1	9	124	6	170	18	9	24	1	30	7	11	409	0	129	49	2	16	11	6	21	206	2	0	0	3	6	4	1	91	4	14	5	0	1	4	2	1	1	35	3	1	7	2
Control	mCTRL0555	CCAACCCGGCATCGTCCGCT	5410	2072	40	139	4126	201	1116	47	598	826	122	7002	161	100	308	268	1014	645	306	1490	756	656	1307	228	188	357	7	35	14	122	90	6	18	22	68	11	22	84	761	16	28	30	125	14	98	9	16
Control	mCTRL0556	GCGAGCGCTATCCCGGTGGA	3172	692	423	960	7056	604	43320	125	16591	366	68	166	474	364	87	77	130	57	5737	75	659	999	1435	1302	153	219	74	137	73	8436	208	201	312	1215	772	28	9602	45	666	301	673	247	311	278	125	201	473
Control	mCTRL0557	GTGTATGACGAGAAGCGAAG	1095	180	0	0	1	0	0	0	0	0	0	104	0	13	1	5	0	2	1	3	1	0	0	1	0	12	0	0	11	0	0	0	0	0	0	21	3	0	0	0	1	4	0	3	4	0	0
Control	mCTRL0558	GGTGTGGACCGCTTTTACGC	8063	1204	43	118	2	47	156	5	76	11	9	2216	21	50	101	68	81	48	73	31	25	25	44	12	215	10	3	16	0	2	4	28	16	9	15	5	22	1	3	6	30	64	19	5	8	2	2
Control	mCTRL0559	GTTATACCACCTACTATGAC	4305	690	2	8	0	4	49	26	6	103	4	18	3	22	0	0	2	27	11	6	11	11	17	37	285	41	0	0	1	2	18	1	9	4	11	5	3	156	4	9	3	5	42	4	1	0	1
Control	mCTRL0560	GATACGTGAGGTTGCCGGTG	1719	389	11	17	16	37	7	0	19	3	53	4	4	150	0	2443	112	123	30	16	109	21	7	12	36	5	2	1	4	5	0	0	41	0	0	1	200	0	10	1	22	1	5	2	5	4	2
Control	mCTRL0561	TATGCCATATGCCCGTTTTT	7882	1921	526	79	27	1287	180	19	31	210	18	13	90	20	38	63	285	20	52	28	16	219	31	240	34	164	42	9	10	488	6	5	21	12	26	8	63	6	353	20	9	2	13	10	6	70	7
Control	mCTRL0562	TCATCTACGGTATCGAAAGG	2766	753	1	33	5	6	83	15	18	2	1	8	4	12	2	4	2	19	13	14	27	11	2	11	19	3	3	0	4	0	0	1	1	0	1	0	0	0	0	0	0	1	2	10	2	0	1
Control	mCTRL0563	AGTGTCACGGCAAAGTCGAG	1957	342	1	13	3	6	10	2	8	1	5	15	34	0	0	8	9	35	8	2	3	1	28	5	3	562	0	1	10	3	0	0	16	3	74	0	0	2	0	0	5	1	6	3	1	7	1
Control	mCTRL0564	CAATGGCGTCTGCCGTTCAG	3192	840	3	710	19	2	177	12	30	109	550	11	18	19	5	15	3	122	3	14	0	8	36	2	0	373	0	0	4	0	1	3	0	29	16	4	0	4	5	8	0	1	44	11	39	5	9
Control	mCTRL0565	GCTCGCTGATGTGTAATCCG	3518	750	14	123	33	193	29	7	4	1	5	26	60	14	3	12	1	47	5	7	8	16	78	272	26	4	204	4	18	3128	207	116	5	6	4	7	0	1	9	4	603	0	4	91	3	10	6
Control	mCTRL0566	GGATACATCGGCGCGCTAGT	2436	534	6	32	245	35	12	2	14	1	54	184	22	29	16	11	5	126	1387	109	8	27	11	2	34	11	6	0	6	40	2	4	5	20	562	3	4	37	18	180	17100	9	16	150	25	985	10
Control	mCTRL0567	CAGCACCACGCGTCGTGCGG	3683	1087	18	83	164	101	57	119	244	49	14	31	17	18	114	113	154	30	257	122	20	179	26	104	12	325	1	1	2	85	85	1	2	142	90	3	30	17	51	12	0	10	178	6	42	18	4
Control	mCTRL0568	CGATGTCGAAAGTCGGTCAA	3153	706	8	40	43	310	4	156	96	9	98	30	5	263	359	4	82	210	98	16	8	41	206	45	11	78	1025	9	11	0	0	3	0	3	2	21	330	17	17	3	0	30	29	44	4	71	18
Control	mCTRL0569	CGATACGCTATAGAATAGTC	1899	330	1	2	0	18	0	0	23	25	0	1	0	0	547	0	12	2	7	9	2	0	0	3	1	16	0	0	0	0	0	0	2	0	3	0	8	0	0	0	0	0	0	31	1	64	3
Control	mCTRL0570	GCGTGGAGTTCGTCGCTCTT	3518	836	41	50	48	23	55	12	64	2	213	28	66	69	22	13	53	108	34	22	11	8	38	28	61	1	30	14	4	1	3	8	48	2	6	3	6	12	80	4	3	10	1	11	70	11	28
Control	mCTRL0571	CACAACGCCTACCAGCGGAC	3176	924	31	5	53	122	18	377	96	3	6	14	19	6513	9	9	12	40	37	100	159	2	136	261	8	47	2	0	1	7	3	12	0	2	3	20	4	9	151	29	14	211	14	5	64	6	7
Control	mCTRL0572	ATTTGCCCGTCCATACGCGG	6672	858	2440	107	82	23	82	110	25	593	55	153	847	4282	25	257	478	9870	347	85	158	69	466	2243	4	228	392	2	16	157	8	1	97	33	74	3	13	82	1381	18	189	225	73	8	465	21	84
Control	mCTRL0573	CGGTAAGATGGTTATACCGT	3111	711	0	27	2	8	218	15	12	13	9	3	5	2	31	7	10	21	1	18	4	64	3	1	2	3	5	1	2	55	0	2	0	2	1	0	2	1	2	36	0	1	0	54	2256	1	3
Control	mCTRL0574	GTTCGCGGGGGCTTCTATCA	2825	651	1149	193	291	6745	692	54	1359	284	24	24	197	323	71	47	1286	530	313	221	453	7968	124	35	87	711	292	662	749	20	68	67	57	615	23	41	3	23	194	13	352	16	318	137	12	7	17
Control	mCTRL0575	GGCACCGCGTTTATTGCACT	5897	1136	2652	4643	1476	20357	40551	1220	2714	4655	1162	133	21730	181	3604	14900	4651	1591	1474	405	1151	56	630	639	2314	3266	1159	1134	1815	1763	1862	762	837	207	453	373	28	15884	215	4601	126	332	96	4031	657	636	640
Control	mCTRL0576	TGACAACCGCGGTACCTCTA	3443	746	6	31	85	177	29	79	9	19	32	16	70	1500	95	4	11	6	4	19	489	24	9	99	113	3	1	0	189	55	3	72	5	1	1	1	0	737	43	0	20	2	0	9	11	184	0
Control	mCTRL0577	GGTCGCTCGATTTCATTTAA	1497	890	27	172	381	4	48	27	50	20	79	141	4	258	263	53	6	11	53	4	246	9	27	94	1272	210	487	33	32	5	3	181	5	147	2	14	11	445	7	316	11	5021	15	115	49	50	6
Control	mCTRL0578	GACGAAAGGTCCTACGAAGT	1276	183	1	0	2	11	0	0	10	59	0	0	0	1	2	0	0	80	0	0	4	0	12	1	2	9	1	0	1	48	133	0	0	0	2	25	1	0	0	0	0	0	4	0	6	0	0
Control	mCTRL0579	GTACCACTTATCGACCTTGC	5220	708	12	5	0	16	86	5	45	2	27	11	14	3	5	58	55	25	4	22	5	1	8	50	12	19	51	0	0	0	3	8	1	14	0	4	21	1	4	1	1	3	12	1866	16	15	1
Control	mCTRL0580	TTCAAGTGTTATGGACGCGC	3316	619	273	4	9	4	7	15	17	170	111	61	7	13	13	8	132	8	6	75	234	20	12	6	130	3	1	0	7	0	130	17	1	16	0	3	12	10	3	4	4	1	5	5	1	1	0
Control	mCTRL0581	TGAGAGCAAGGCGCATACGC	2930	878	86	187	49	972	107	32	217	238	177	1190	66	516	52	18	22	21	1004	32	2769	307	115	4	62	77	3023	55	595	56	63	69	50	22	152	32	55	45	20	9	5	24	940	40	9	35	22
Control	mCTRL0582	CATTCTCTGACGAATGCGCC	1244	305	1	0	0	5	6	0	8	0	8	21	7	30	23	7	7	1	14	6	3	6	3	4	7	247	10	0	2	3	0	1	1	1	29	0	1	0	0	2	0	24	1	0	1	3	2
Control	mCTRL0583	ATCCCCCCGACTTAGGGATT	2702	731	9	15	0	28	294	13	13	179	42	7	20	10	4	2	54	8	5	6	22	3	5	31	16	13	1	0	0	0	7	3	0	1	2	9	0	2	0	1	2	16	2	1	3	4	1
Control	mCTRL0584	CAGTGCCGGTAGCGGCACGG	2030	841	6	62	103	37	201	101	49	18	30	14	464	83	20	18	21	297	23	14	27	13	42	45	37	77	1	2	3	4	3	5	7	7	6	5	198	1	9	2	6	2	9	4	4	4	7
Control	mCTRL0585	ACGACGTCCGCTGTGTGTAT	7396	2150	9	64	873	1194	61	109	127	220	861	290	90	130	118	68	61	339	122	66	380	59	99	27	32	113	31	14	10	135	6	120	6	17	1931	15	512	4	150	4	748	14	143	9	22	12	19
Control	mCTRL0586	GCGCTCGAACAAACATGGTC	1519	235	0	0	0	0	0	0	0	0	2	0	4	0	6	1	2	0	0	0	1	1	5	5	4	1	0	0	0	1	0	0	0	0	1	0	0	9	0	1	0	1	0	4	2	0	64
Control	mCTRL0587	GGCAACGCACGCTGGGTTGT	3291	738	28	37	10	188	353	59	1071	8	364	10	36	91	26	5	13	20	1	20	58	29	9	12	13	22	5	0	0	2	0	5	2	5	4	107	1	2	32	8	0	5	3	23	4	2	2
Control	mCTRL0588	GCTATTCCGCTCGTCAATTT	3365	715	46	519	93	54	35	15	56	27	5502	406	24	40	224	13	78	146	88	452	17	12	240	27	150	92	8	25	301	8190	28	93	10	17	17	1	185	9	11	3	313	3	41	4166	8	850	18
Control	mCTRL0589	TTCATCGCAGATCGATTTCG	3941	1087	4	10	8	2	1	5	23	8	1069	9	12	2	9	9	23	12	9	7	17	6	5	17	97	5	1	5	3	0	1	14	28	5	0	2	0	4	5	2	5	2	5	6	4	0	2
Control	mCTRL0590	TTCATCCTTCGTAGCGCAGC	3472	486	1	9	25	12	0	1	9	3	5	4	6	5	11	3	3	3	22	14	4	8	8	5	2	4	0	0	4	2	0	0	0	9	1	1	0	3	1	3	1	0	6	5	9	0	0
Control	mCTRL0591	TGGTTCACCACTCGAGATCG	4182	1124	43	982	40	101	97	3	150	39	1098	3	111	36	182	157	517	135	75	5	10	214	47	4	111	74	0	8	9	31	16	203	1	40	20	3	20	31	16	18	4	5	7	8	21	763	3
Control	mCTRL0592	TTGAGCGGACCCCCCTACAA	2238	465	14	487	847	64	0	101	24	1	314	120	69	2	31	0	28	348	7	48	85	134	4	1	200	607	63	3	21	3245	9	365	15325	283	27367	1	6	21	9769	283	1	81	212	33666	3	9	5
Control	mCTRL0593	ATGTGTATGAAGCCCGTCAT	4387	860	1	117	17	11	154	12	179	50	10	31	566	107	37	212	11	143	35	4	147	49	39	46	6	45	2	0	2	0	1	0	5	2	8	3	21	0	3	7	2	9	4	11	8	21	8
Control	mCTRL0594	TAGGTGGCGCCCAATCGGAC	3166	713	45	15	19	1	35	52	65	26	10	264	10	1735	166	107	1733	13	17	354	5804	13	28	90	30	487	9	0	56	21	2	4	3	9	1	33	115	15	492	0	2	2	19	13	4	0	10
Control	mCTRL0595	CTCGTGTCACTCCTCGGTTC	13131	2484	82	198	66	311	259	501	106	172	677	277	154	53	103	100	86	2263	296	170	95	120	51	235	111	328	6	47	34	2	16	331	48	52	152	134	379	22	78	55	127	501	107	84	228	54	397
Control	mCTRL0596	ATGCCAATGCCGTTGTTAGC	4061	782	56	14	410	85	30	12	8	12	185	65	7	0	11	8	581	79	135	13	7	92	28	24	59	30	60	10	5	1	3	349	3	55	130	21	2	141	29	21	3	107	34	3	6	5	0
Control	mCTRL0597	CCTTACGGCGGAGAACGAGT	87	34	0	0	0	29	6	0	0	0	0	0	0	1	0	3	0	0	0	3	1	0	0	1	16	0	0	0	0	0	0	0	0	0	0	0	0	0	0	0	0	0	0	0	0	0	0
Control	mCTRL0598	CGCGCGGATCTTCCGTACAA	2700	596	189	3439	1372	10147	4342	1365	1524	11281	476	596	13954	1503	116	311	4481	2463	2473	1400	3576	2386	841	29535	349	877	12	21	5	19	2325	403	308	477	337	15	4395	18	888	11	78	9	270	7365	5945	14	681
Control	mCTRL0599	CGGCAAGCGCATTCCTATGG	3707	837	1	26	7	8	5	18	17	7	17	118	21	9	8	16	29	3	15	16	17	10	4	7	21	6	2	1	0	0	4	2	1	3	9	2	1	8	4	0	0	0	10	5	7	1	0
Control	mCTRL0600	TATGATCGTATGGCCCTTCC	7501	2250	16	154	650	74	80	81	153	1202	124	35	1751	61	251	49	110	85	36	297	67	604	170	69	89	423	28	8	4	20	6	8	26	45	64	108	5	14	770	39	5	23	7	17	1089	16	26
Control	mCTRL0601	ATCGCCTAGCCCAAGCGACG	2249	221	3	8	91	37	51	2	2	4	47	3	4	81	3	1	4	2	0	4	3	0	3	4	0	4	0	0	0	0	0	1	0	0	0	0	1	1	1	0	0	10	1	8	1	0	0
Control	mCTRL0602	GCGATCGCCGGTATAGCTTT	359	37	0	4	0	0	7	0	0	3	0	0	0	0	0	0	9	0	0	0	0	0	0	0	0	0	0	0	0	0	0	0	0	0	0	0	0	0	0	0	0	0	0	1	0	0	0
Control	mCTRL0603	CCGTTCAATTATGCTGGCGT	3132	1247	21	493	71	45	28	56	12	56	7	16	17	19	3	236	11	4	6	18	38	14	16	9	16	153	0	4	5	2	12	10	1	18	24	2	117	5	0	0	0	0	2	10	4	2	31
Control	mCTRL0604	CCAGCTAACGTTTTAGTACG	4583	1266	4	1	72	89	75	4	315	24	35	980	5	19	226	2	32	16	7	36	22	8	53	10	43	17	9	4	2	2	3	9	75	82	54	7	29	6	39	6	1	1	5	13	4	2	16
Control	mCTRL0605	TCCCCTTCGTCGGCGCCAGG	6935	1783	29	186	22	279	209	36	504	9	56	48	63	146	908	15	40	23	994	31	125	123	37	953	3807	20	12	506	305	7	6	20	10	8	982	16	1	17	6	49	2	19	6	20	14	19	8
Control	mCTRL0606	TTCTGATTAGATACGTACGA	3469	966	388	98	34	22	25	2189	49	7	22	27	24	90	20	7	403	20	309	10	148	99	78	10	689	58	11	4	167	155	919	49	38	75	6	312	28	164	357	3511	15	6	14	130	18	13	22
Control	mCTRL0607	TTTTCGTCGACTAAGTCAAG	2697	481	3	14	12	499	13	6	130	4	1	4	10	7	9	8	42	12	35	2	10	51	16	30	32	4	4	0	1	31	0	14	0	8	3	2	4	1	13	21	5	0	4	2	7	5	1
Control	mCTRL0608	TCAATTAGTGGCCGCCAAGC	5888	1360	9802	19694	990	482	257	509	408	63	151	20873	1335	66	772	793	772	3521	1467	91	5595	157	1634	317	9	652	475	306	11232	513	52332	14927	1236	12197	88	1290	98850	149	1392	22	1018	13464	164	253	3084	575	393
Control	mCTRL0609	TCAGCTACGATCGGACCCAA	2892	830	37	53	1673	195	392	1898	98	744	762	67	104	357	18	1181	213	23	123	1567	119	785	569	500	116	218	3219	98	306	106	5	11	173	4	385	78	57	97	67	298	2124	1	212	535	86	200	204
Control	mCTRL0610	GCACGAACCCGTTCGTATGG	2836	801	27	5	13	323	5	17	46	497	23	20	29	18	22	23	16	751	49	37	19	14	20	551	6429	112	1380	23	109	17	889	33	7823	3293	28	6	398	7	307	55	241	4	10	244	9	8	22
Control	mCTRL0611	CAATATGCACGTAGCCTCGT	4431	2146	46	945	28	60	69	23	226	32	26	465	996	1191	11	586	5097	17	37	187	2481	23	4391	841	4829	236	39	92	4	13	1223	112	2571	952	355	9	3354	205	280	10	46	11058	4415	56	11	2	28
Control	mCTRL0612	GACCGACGGTATACCCTACT	4180	1068	32	66	71	18	34	82	5	137	16	52	788	188	223	29	80	61	13	20	10	4	79	19	26	934	61	368	2	4	1	20	0	6	2	5	0	0	8	0	0	2	24	7	35	1	4
Control	mCTRL0613	TTGAAGTAGGGTCGGATTGA	3016	775	5	118	413	26	13	15	157	9	31	8	14	17	10	21	57	149	86	885	3	51	16	55	14	186	16	6	70	10	528	26	3	31	38	1	2	1	6	880	18	6	2	37	6	1	9
Control	mCTRL0614	AAGGCGTAAACGAGTACACG	1663	525	40	1	1	12	1	34	4	15	7	0	68	98	45	609	10	7	5	4	3	14	21	9	0	11	2	0	2	493	0	2	17	8	75	0	5	139	4	1	9	4	168	214	1	5	1
Control	mCTRL0615	AATGAGCTTCGAGTTCGTCT	2108	233	2	0	36	1	0	0	22	0	0	427	0	22	2	1040	0	25	24	3781	5	14	5	3	22	14	0	1	309	0	50	0	0	4	0	1	0	0	0	0	0	0	0	7	1	3	34
Control	mCTRL0616	ACGTGTTCTCGTACTTAGCT	2609	517	1	28	5	6	528	15	87	9	11	21	75	273	42	84	6	10	53	37	1020	5	11	24	21	791	14	1712	24	11	218	8	161	2580	4	28	24	2531	28	2	13	3	8	1370	15	253	21
Control	mCTRL0617	TTAGCCTTGCCCCGTCATAC	8592	2344	6138	11020	136	4048	41	114	359	267	814	14121	1448	3779	33645	7209	2577	88	88	74	30	136	4858	89	4710	3571	12878	107	163	185	288	860	70	7145	288	108	69	42014	63669	265	258	2514	2239	12448	1213	1004	240
Control	mCTRL0618	GCCTTTTCCGCCCGTTCAAG	3351	1950	3646	21202	10649	10244	25492	39442	21246	4107	5072	18331	4815	6111	7747	9635	18689	10215	8282	4406	2504	4432	2690	4791	9168	13982	1115	527	1561	1442	3124	1361	3177	1910	1457	5639	4407	7096	416	8588	15663	1174	3638	1043	214	460	930
Control	mCTRL0619	CAGAAACTCTTACCGAGCGC	2504	329	9	852	61	949	11	6	30	26	725	3	290	0	41	16	94	1	87	1	13	41	12	1341	13	2	20	1	159	7	1	0	0	8	31	0	1	0	0	0	4	0	1	2	4	1	6
Control	mCTRL0620	CTTGAAAAAGGGGCGACTAT	1725	245	0	4	0	0	16	0	0	3	0	12	0	3	28	2	7	24	12	9	3	3	0	1	0	1	0	0	2	4	2	0	0	0	0	1	0	1	0	0	0	0	4	0	1	0	0
Control	mCTRL0621	CCTACTAACGACGAGTCAAA	2097	416	7	38	48	49	6	16	5	169	7	33	57	95	5	9	20	0	16	128	2	196	1	2	1	8	64	420	1	27	1	18	6	1	1	1	3	823	3	7	204	10	283	10972	4	3	2
Control	mCTRL0622	CATTTCCGGGGTCCGATGCA	5589	1048	95	39	9756	109	3985	135	438	283	144	7	42	49	3894	38	43	6	7	44	104	13	23	194	26	19	4	0	4	51	4	109	3	14	168	3	5	7	44	8	4	5	24	723	513	74	10
Control	mCTRL0623	CCGGGCGCCGTATCCCCTAC	5050	1078	56	377	211	49	23	57	27	30	2078	292	1293	129	67	1724	285	64	102	155	399	66482	40145	108	109	112	588	39	53	3835	69	2	44	735	23	5	18	1295	328	1880	12	12	229	1776	5	490	29
Control	mCTRL0624	GAGACCCATTATGATCCTAG	1462	249	1	3	5	1	0	7	4	0	0	4	454	387	11	21	84	85	26	89	48	3	8	51	502	64	11	0	0	189	3	3	8	1	0	0	21	5	0	0	0	0	1	187	0	3	233
Control	mCTRL0625	CGAACTTCTACCGTTGTGCG	3256	767	14	505	11	6	191	18	1382	773	55	2	16	85	64	426	15	36	116	13731	36	44	21	803	10	197	10	2	13	1	30	14	5	6	26	1	66	9991	2	1	9	1	354	18	458	2	6
Control	mCTRL0626	TGGCTTAATGGACAGCGCGA	2206	738	10	328	18	257	113	4	53	2	8	74	64	10	77	240	62	986	4	10	32	277	19	603	4	23	2	2	1	0	16	50	31	46	16	12	34	4	33	5	2955	88	16	10	145	7	68
Control	mCTRL0627	CCGGCGCTGCGGTCGGCTTG	3006	1003	771	687	2102	1058	4388	1071	1402	2063	3927	278	1779	1086	3424	3166	428	8903	4540	1073	301	523	5655	2701	2602	10882	902	514	9183	7183	4094	2090	2059	1250	6293	2680	13699	577	4927	43430	1729	1398	1088	4535	29581	70	933
Control	mCTRL0628	GTTACTTACCTGACCGGCAA	2647	629	1	12	5	46	2	13	3	5	49	17	34	466	15	7	11	22	12	9	5	4	30	3	6	17	1	57	6	86	4	34	4	16	14	3	5	4	14	106	243	8	11	189	3	3	14
Control	mCTRL0629	CGTTATTGTACACCACGCTC	4630	1027	42	95	1576	969	2713	172	87	550	571	331	55	1061	556	1341	15	443	97	1310	286	74	132	423	795	15	23	17	553	41	17	285	21	39	550	15	331	41	93	3	146	31	138	9701	15	301	14
Control	mCTRL0630	CGAGCTCGGCAAATTTGATT	3048	738	45	12	1	97	7	2	13	16	16	181	0	40	215	313	6	4	3	0	3	1	14	51	1	63	47	4	4	0	69	16	7	0	14	0	15	8	65	14	6	13	2	1	7	3	1
Control	mCTRL0631	TGGTACCACTCGCCGAATCT	5624	1336	37	95	60	1218	96	79	173	593	168	286	35	1290	83	523	1776	321	7599	20	520	824	659	716	6772	418	19	8	106	26	25	9	7	30	86	19	5	22	4	5	1272	9	20	31	25	11	7
Control	mCTRL0632	CGTGTTTTACCTCGCTTCGA	5162	1262	71	108	204	105	79	189	29	24	85	9	316	50	341	18	39	230	13	243	10	71	200	107	49	253	2	2	26	26	8	598	79	24	798	107	10	60	14	50	45	6	20	11	45	3	4
Control	mCTRL0633	CGTCCTCGCAGCGTAGACTG	4489	1479	74	91	56	339	3022	296	175	423	605	681	565	177	47	517	496	586	86	49	28	527	193	17	75	3611	18	3	919	25	4	122	36	39	458	10	76	34	6	5	28	67	313	62	45	33	11
Control	mCTRL0634	GTACGCAGGGTGTAGCGACC	2507	599	356	184	43	34	175	76	5	14	2	8	7	5	332	23	79	27	12	7	4	21	18	44	17	51	2	0	9	0	1	3	0	0	4	1	4	4	2	0	0	0	2	2	4	0	1
Control	mCTRL0635	CCTTTGATGGGCGCGTACTC	3739	781	21	17	104	1072	2328	65	71	88	1192	85	3968	316	75	86	228	39	118	3419	13252	701	317	61	22	1474	45	3	9	426	8	651	764	202	103	46	12	13	3995	22	49	26	21	13	86	7	37
Control	mCTRL0636	CCCTCGGTTGAGCAGCGCGA	4499	1526	1180	4435	1531	3908	241	3685	1669	181	126	1915	1524	1820	234	3139	290	5857	247	1057	1052	44	1107	1298	1129	2125	45	27	87	346	372	46	409	1225	253	60	82	150	248	662	44	35	45	1353	12	237	476
Control	mCTRL0637	AAGCGTGAGATTCACCGCCG	1758	207	7	1	146	0	45	0	11	1	0	2	0	0	0	0	0	73	4	9	0	9	1	5	2	0	6	3	0	1	0	0	1	5	0	0	5	1	2	1	0	0	0	0	6	1	1
Control	mCTRL0638	GCGGGACCCCCGGTATAGTC	1026	231	1	0	0	3	834	4	5	142	0	0	0	0	1	1	6	5	1	0	0	11	56	0	1	0	23	0	0	0	0	1	2	0	12	0	0	4	3	0	3	2	117	1	0	1	5
Control	mCTRL0639	GACAGCCGGTTGACCGGGTC	1981	279	1	11	4	2	6	5	17	10	10	22	20	51	1	1	2	26	5	4	1	1	3	0	11	6	10	0	0	3	0	1	0	11	11	0	0	0	1	9	0	1	4	2	0	0	0
Control	mCTRL0640	GGAAACTCTTGCTCGACACG	1379	234	87	569	1506	6	554	38	42	5	21	183	365	726	8	85	13	641	15	15	361	17	2	55	626	213	83	3	12	2	46	90	33	84	112	58	3	458	163	24	1	4315	114	147	2	11	7
Control	mCTRL0641	TTGAACACGACACCCGTGCC	5631	1184	197	33	1011	38	39	42	124	48	203	39	2338	23	42	282	24	39	4142	21	34	90	47	924	389	238	3	22	4	11	9	2	90	94	1	3	7	22	6	506	21	32	2588	20	7	89	4
Control	mCTRL0642	GTCGCTCGAACTCACGTAGC	3721	935	226	30	20	34	44	48	13	2	12	9	124	2032	137	7	646	550	13	12	37	77	16	20	257	10	4	3	8	20	17	82	7	4	13	156	14	10	19	2	2	3	28	7	14	1	11
Control	mCTRL0643	GGGCGCGTCATAGACACACG	1605	1585	1165	4879	2501	10536	14582	1471	1664	24706	666	521	216	3888	2097	396	2688	2230	1839	1783	1109	670	1305	1767	786	7708	1204	144	2148	307	198	383	44	664	622	58	1673	1127	898	332	1011	146	46	77	28	112	257
Control	mCTRL0644	CGTCGAAGATACGCAGGCTG	2539	508	5	132	88	5	15	5	152	0	26	4	39	21	30	7	5	11	5	17	6	65	1	11	8	6	12	2	3	0	2	1	0	3	0	1	3	36	4	0	0	1	2	0	6	0	9
Control	mCTRL0645	TAATGGCACTTACCGGGTCT	3958	1082	322	565	1661	2442	1124	395	638	1474	1260	13572	1233	248	193	901	439	25241	15659	3656	3376	1418	120	309	226	62	42	34	274	102	65	5236	189	618	216	6791	1608	74	3497	691	14	112	439	106	41	19	637
Control	mCTRL0646	CTAACAGCGCCGTTATCTAC	4495	775	342	22	268	120	358	79	65	682	61	152	52	132	34	77	34	2089	108	94	7	405	535	175	86	452	4	2	43	24	5	16	7	375	35	16	40	115	9	155	1799	37	573	16	7	18	141
Control	mCTRL0647	TTAGTTCGACCACTCCTGAT	4816	1471	33	556	199	181	79	67	169	53	138	288	122	18	177	67	154	362	582	225	374	35	152	170	34	78	25	24	38	22	25	93	3	716	338	115	108	792	2	59	25	13	10	954	18	1571	60
Control	mCTRL0648	AATGCTGCGTACGATAACCG	3292	285	0	6	2	0	4	1	37	3	2499	1	71	1	30	157	2	5	14	6	41	1	4	1	1	4	2	0	10	1	1	0	0	3	2	0	0	124	0	0	2	0	15	7	1	0	2
Control	mCTRL0649	TATGACACACAATCTGCGAC	2840	485	54	196	21	131	241	34	49	59	58	107	109	313	6	55	96	243	120	46	55	17	19	205	303	132	127	56	19	9	35	233	18	232	55	45	1	212	82	28	6	936	61	60	3	12	4
Control	mCTRL0650	TTGGCGGCTCGCTCCTGCGT	9938	2320	3929	12819	1817	9759	11548	6596	6905	10077	15913	18146	17878	27211	9360	56771	22865	15180	6989	10114	16435	17184	10625	3727	1355	8165	7361	15304	6086	4826	1130	4146	264	43471	9500	25041	5840	13919	1863	23829	33422	4574	1858	6512	4056	16804	2646
Control	mCTRL0651	AGTCAGCTCCGGGGTATACG	2413	527	8	13	0	95	15	2	2	7	81	25	187	4	97	57	49	7	44	5	5	9	46	5	9	35	7	1	1	1	1	31	21	32	7	1	1	2	1	2	1	0	5	17	68	1	2
Control	mCTRL0652	GCGAGTTATTTCGCTATAGG	2186	473	2	0	7	0	1	58	4	1	95	2	6	0	176	41	1	1	2	3	381	4	4	11	29	0	0	0	4	33	0	0	0	0	3	0	113	0	0	0	0	0	1	95	2	0	0
Control	mCTRL0653	ACGTTGCAGCTCGCGTTTCG	4143	858	65	63	90	148	103	54	87	54	382	96	6	122	65	34	100	9	21	347	182	82	165	119	576	72	13	4	21	2073	6	3	4	19	44	3	19	6	4	27	167	3	12	13	5	30	8
Control	mCTRL0654	CATCGGTAGTCACTACGCCC	6077	1792	51	90	157	127	78	64	34	155	104	552	65	18	28	148	134	20	36	944	23	105	207	61	60	66	4	71	114	3	9	1592	5	62	50	18	20	32	43	6	5	4	7	5	8	5	3
Control	mCTRL0655	GACCACTATGTACTTATCGC	4792	1081	74	847	31	92	36	93	342	94	81	1593	75	15752	655	295	138	8	1365	268	86	73	57	44	236	14	5	2	85	2018	7	11	399	11	23	17	9	81	2	6	34	4	12	114	6	39	16
Control	mCTRL0656	ACCGCGCATCATTGACGGTG	3400	695	30	6	15	31	125	30	1001	34	1	9	12	61	54	298	8	6	8	5	10	20	9	10	48	606	2	17	4074	15	0	1	18	5	5	0	6	440	2	4	1	0	0	1	4	0	2
Control	mCTRL0657	CAAACGAGGCCACGTACGTG	2339	509	129	128	49	12	30	88	90	13	4	2	2	38	45	29	7	15	19	3293	20	7	33	14	1815	32	25	299	14	0	148	3	0	0	2	0	2	0	1	15	6	8	104	9	1	4	3
Control	mCTRL0658	TCACTCAAAGTGCGTAGTCG	4152	951	17	24	35	102	91	3	28	35	444	15	56	60	348	136	36	84	11	117	21	31	125	108	3	35	67	37	6	16	8	3	8	8	5	1	34	1	858	4	1	9	12	234	3068	2	14
Control	mCTRL0659	GTGTCTTTCGGTCTTACGAG	2901	699	6	10	2	12	37	11	251	6	10	10	229	5	161	11	7	42	2	1	3	12	16	5	19	24	6	0	5	5	26	5	1	1	1	4	1	15	3	7	0	0	2	1	8	0	1
Control	mCTRL0660	CCGTGATTTCGGTAGCGTAC	3745	1197	245	47	15	51	70	41	18	3	437	381	68	110	27	64	724	26	37	13	44	19	32	854	35	281	35	8	21	1	8	992	601	14	28	12	2573	27	3	9	6	1	37	1	7	10	27
Control	mCTRL0661	CTTTGGCGTCGAGAAGCGCA	2802	907	14	2	23	110	45	13	62	241	106	46	125	18	7	46	12	182	3	19	10	9	8	62	1	13	43	3	7	5	4	0	2	16	14	3	1	0	5	10	4	7	12	13	16	2	6
Control	mCTRL0662	AGATAGCGCAATCCCGCATG	2564	253	5	17	0	74	52	28	15	11	37	25	4	1	101	9	0	85	15	31	5	7	74	1	3	45	320	0	3	5	1	12	6	49	433	2	0	0	3	9	81	9	3	5	5	4	0
Control	mCTRL0663	CATCAGCCCATTATGACTCG	3832	1030	1	103	3	9	0	1	10	5	128	12	2	41	598	9	41	16	8	12	8	6	532	19	1501	13	0	0	15	2	3	0	1	1	1	0	26	2	3	10	2	4	6	5	2	4	1
Control	mCTRL0664	CCGGAGCGCGTTGCAGTTCT	4319	1421	1000	48	22	89	65	115	553	49	183	1020	295	269	764	402	18	829	191	122	571	152	3059	60	907	376	25	8	17	237	5	39	57	39	23	16	24	3858	26	3	4	34	18	45	8	40	5
Control	mCTRL0665	TTTTAGTAGGTCAACGCTGT	3036	779	1	14	52	53	103	33	21	15	66	12	55	9	37	10	28	102	5	9	4	26	39	12	0	19	1	219	1	5	6	2	1	28	0	4	3	12	1	5	1	1	8	6	7	1	0
Control	mCTRL0666	CTAATTCCAATATCCGTCTG	5753	1253	159	720	28	134	203	142	120	48	127	130	23	107	41	122	10086	167	58	230	189	22	93	197	649	248	266	8	21	11	21	14	16	79	20	20	28	2981	5001	20	33	4471	129	2989	22	268	35
Control	mCTRL0667	AGTTAAGCGCGTATCTACGT	2991	852	2	10	6	1	4	8	5	4	10	5	2	59	13	5	8	50	0	0	8	8	37	3	2	21	0	0	1	0	8	6	8	5	0	0	12	2	2	3	7	120	1	12	215	1	9
Control	mCTRL0668	AGTCCGGTCGAAATCTGTAT	3792	1067	102	87	37	919	93	21	61	80	61	13	72	210	9	207	24	5	1568	209	132	47	64	1792	39	150	161	3	6	12	2	4	0	7	84	103	48	1	4	6	0	10	8	322	9	7	13
Control	mCTRL0669	ACGCACCCATACAGGCGCTT	2848	733	65	6	6	131	4	2	19	25	36	5	9	71	6	12	5	19	6	5	68	1	29	2	23	14	0	0	2	3	0	1	193	3	1	2	1	1	5	1	1	3	7	95	14	0	28
Control	mCTRL0670	AGGCCCCGAGACGCGCCACA	3365	813	8	56	54	48	385	618	102	5	8	907	108	25	40	22	21	14	286	8	84	62	1526	9852	10	679	1074	5	56	254	543	853	219	3622	14	4	1	7	11	46	1	247	17	10	2	29	8
Control	mCTRL0671	TGACCCGTCTCTTCGCGCAC	7301	1662	33	100	207	437	97	309	277	335	153	40	24	219	65	270	171	2875	399	645	68	37	556	357	845	44	18	63	82	255	50	34	159	36	148	19	3	10	26	66	132	44	30	18	299	25	43
Control	mCTRL0672	TCCTCCGATCGACCAGGGTA	4513	1834	194	56	103	123	210	161	110	229	932	64	249	336	136	775	44	674	725	304	32	207	465	375	347	519	84	251	38	216	1647	280	291	364	542	205	165	34	228	44	170	67	300	304	34	35	111
Control	mCTRL0673	CGTTAATCCACCGTATGGGC	3054	532	9	7	33	4	66	1	85	3	20	2	5	7	19	52	149	23	2	4	15	1	22	11	14	1	4	0	5	112	0	0	11	8	2	0	1	1	18	11	0	9	13	2	5	1	0
Control	mCTRL0674	ATTAGGTGACTGGAACACGT	2762	473	29	256	218	148	62	87	37	1353	1390	42	417	98	545	62	324	546	84	45	8	18	3	6	9	3	5975	190	34	84	21	1	48	168	1430	3	1	12	12	2	1	7	159	68	72	4	151
Control	mCTRL0675	TCTTCTCGAGCGTGCGGGCC	6782	1670	196	194	22	2956	396	93	115	9	544	334	3921	2057	15727	409	12	31	3938	22	30	61	139	414	679	292	2704	47	29	7	87	212	72	116	15	1	2	18	24	159	10	44	39	17	19	112	3
Control	mCTRL0676	CGTGTGTTTACAGCCCTTAC	5581	1219	54	48	25	26	450	8	938	25	303	4	29	7	55	1044	2905	14	41	488	73	7	120	88	6	43	0	6	522	0	0	2	7	4	29	5	448	4	3	16	7	7	131	500	8	5	1
Control	mCTRL0677	CTACCGGTCACGTTGTGACC	2814	508	4	6	0	10	5	8	30	10	0	8	37	2	31	10	12	3	33	95	2	52	364	6	149	9	21	2	1	6	44	14	0	0	0	0	6	3	2	0	0	7	0	2	3	2	25
Control	mCTRL0678	TGCTGGCCGATACGTGCTTG	9472	3431	783	3805	1443	6500	8901	931	3299	2203	1696	2352	1193	5265	2790	3022	12772	1625	1541	8932	3157	1597	6624	3417	6145	3312	7831	2256	1185	1701	1681	3234	705	5696	7064	3347	707	1012	4643	1214	3878	9635	6699	1200	1087	4390	9003
Control	mCTRL0679	ATACCTCCGCTACACCGTCT	8916	1778	123	93	367	165	106	290	497	98	3625	464	2751	94	545	256	301	132	95	69	45	128	1143	105	1705	491	23	23	32	18	152	88	44	3960	40	9	49	31	36	37	8590	1368	48	72	66	67	1670
Control	mCTRL0680	CTCGTCGGCTTTCGTGCTGC	10225	1862	109	316	371	66	101	77	137	23	95	65	75	84	182	124	48	34	81	642	64	13	1507	2319	58	646	12	9	165	68	16	12	202	379	41	217	29	28	19	463	4	746	21	27	7	50	33
Control	mCTRL0681	GTAGGCCGCTGATCGAATAA	2029	684	49	33	143	21	12	2	588	3	106	223	88	14	65	715	13	37	3	6	9	126	5	13	462	7	0	2	8	23	1	1	40	0	7	2	3	0	2	0	4	0	0	4	6	4	1
Control	mCTRL0682	TTTCTAGGGCCGCCGCCCGC	10033	1999	201	815	470	587	4701	2863	197	331	2683	577	159	2897	6195	336	252	952	1772	394	232	75	301	3201	363	480	3827	481	12115	19584	2771	1178	68	56	1122	201	814	1156	1535	120	2673	656	674	7305	434	272	375
Control	mCTRL0683	CACGGCAGGCATCTCGTCTA	4396	1192	101	1071	568	453	3417	1494	301	262	127	50	650	166	1563	259	4089	1212	254	1430	706	1844	877	2029	2408	57	88	7	268	121	913	30	296	39	3587	819	191	55	1009	26	79	55	421	65	128	11	354
Control	mCTRL0684	GAGCGCCAAGCGTGCGTTGA	3031	930	10	35	13	8	77	33	16	0	43	63	5	15	7	100	22817	15	28	11	11	15	7	29	148	19	3	13	2	9	4	5	4	5	20	5	6	20	4	9	14	2	6	22	2	4	24
Control	mCTRL0685	CTCGATGCCACGGAAGGCGG	1811	701	7	6	6	8	21	294	0	5	2	2	0	11	27	3	0	4	4	50	7	7	0	17	0	25	0	0	0	5	0	2	2	2	0	2	1095	7	0	3	0	0	11	2	2	0	0
Control	mCTRL0686	CACGCCTTCGTCAACCCTAT	4702	1311	49	56	102	878	79	11	146	58	474	75	60	93	15	177	57	3	40	193	18	21	28	22	31	8	25	359	3	7	57	13	10	16	19	7	0	1	1	112	28	164	2	42	11	0	114
Control	mCTRL0687	GCCCGTTGTGAGCGGCATGC	6190	1741	86	38	51	754	183	3923	495	357	105	144	114	78	66	185	282	6	138	206	96	147	61	144	289	232	56	35	77	55	184	35	29	8	612	13	11	22	28	7	26	12	118	1902	14	23	15
Control	mCTRL0688	GAGCGCGGGCCAGCGAACGT	1785	520	39	833	2250	2658	17	62	150	1822	207	18	953	3594	1149	379	2615	236	72	118	160	975	22	111	5041	533	46	1	28	49	7	67	12	19	68	23	24	12	131	77	4	10	1063	11	3	5	10
Control	mCTRL0689	TCGGATCGGTACATAAAGTT	2919	1141	34	48	3206	73	82	685	23	51	11	25	90	24	135	12	134	25	9	261	10	12	15	203	140	57	287	207	0	2	0	5	1	5	23	0	0	4	33	125	0	28	0	4	3	6	7
Control	mCTRL0690	TGTCTGCCGCATACGCTATA	7164	2860	278	11088	919	3656	2009	5625	164	219	776	549	7059	1203	717	1313	1876	843	769	2497	3719	1272	973	295	43	323	310	30	58	40	215	49	839	121	92	92	222	840	2010	1397	11227	60	790	223	1046	37	25
Control	mCTRL0691	TCACCCGCGTATACGACCTG	6605	1448	29	94	1349	524	654	61	31	27	313	106	4	102	249	62	94	206	28	64	79	338	769	283	13	9	19	7	31	57	5	9	30	30	9	10	12	18	2412	9	237	61	783	22	386	11	28
Control	mCTRL0692	TGTGCCTACGCCATTCGGCT	6605	2216	276	987	269	3915	546	29	762	141	341	2353	1591	2123	157	2222	1534	182	72	119	767	88865	49319	2968	2862	822	753	323	63	5682	49	64	74	230	184	18	161	1690	756	3508	25	24	1639	2471	95	759	121
Control	mCTRL0693	ACCATCCGATATTACGAGCA	2469	582	7	80	70	68	41	58	26	213	144	25	15	8	5	70	98	25	83	7	109	35	1	5	162	46	0	3	0	7	5	0	2	11	40	1	1	3	4	4	2	0	12	4	11	1	19
Control	mCTRL0694	GCTTCGGAGGCTACGTAGTA	1760	507	910	48	4	50	57	29	19	401	0	314	147	88	5079	24	37	606	118	647	8	6	203	44	10	72	295	1219	9	2	4	5	4	14	4	7	2	2140	22	0	24	4667	89	7768	4	7	7
Control	mCTRL0695	TGAGCCGGTGCGCTCTCGGT	881	183	1	0	0	0	0	6	1	0	1	0	3	0	0	1	1	8	3	0	14	1	1	6	0	1	0	0	1	0	2	0	2	2	1	0	0	1	64	0	0	1	4	0	1	0	0
Control	mCTRL0696	TTTACGTATGCTGTGCGCGA	6088	1218	112	399	67	366	369	768	254	146	1449	180	4029	675	45	3846	2119	121	247	760	101	538	9449	853	1255	804	336	18	88	160	826	654	76	2301	1960	222	893	44	628	1071	848	62	358	336	888	296	812
Control	mCTRL0697	TAACTCTAATGCGTTCCAAG	2037	973	190	94	0	71	231	25	432	20	12	6	290	44	37	74	16	15	27	18	17	15	1284	77	691	31	2	0	4	1	0	10	8	16	11	64	6	307	667	1	4	25	100	7	5	0	12
Control	mCTRL0698	TATGAACCTCCGGATCGGTG	2429	301	0	0	6	13	6	3	9	3	10	16	11	15	86	3	15	3	4	2	0	2	52	27	6	3	2	4	5	0	0	6	3	2	0	0	0	0	0	0	4	1	3	3	3	1	1
Control	mCTRL0699	CGTTAATAAACGCGGTTTCA	252	11	0	0	0	0	0	0	0	0	0	0	0	0	0	0	0	0	0	0	0	1	1	0	0	0	0	0	0	0	0	0	0	0	0	0	0	0	0	0	0	0	0	0	0	0	0
Control	mCTRL0700	CGCCCCTAGTTGTCCCGCCC	11016	2621	82	119	690	584	566	136	180	170	164	38	110	91	185	615	257	461	99	134	112	528	216	88	153	161	148	125	159	51	19	177	204	37	46	66	13	10	313	7	14	4	208	27	49	5	16
Control	mCTRL0701	TTGTTTCAGCCTTGAGCGCG	4232	1037	115	892	2512	2738	248	572	4853	382	98	623	189	1207	180	447	62	1037	5407	4606	299	1211	6198	577	33	501	65458	671	1021	6081	154	792	236	3419	167	1409	153	200	384	777	28	2024	486	18178	33	290	1287
Control	mCTRL0702	CTCTCTGCGAGTCGATGATT	4552	1587	85	1510	290	500	1187	127	791	79	256	412	1815	208	877	364	247	250	127	241	394	35	386	1459	11671	8122	75	4	24	6	907	39	42	125	1232	410	5	9	507	56	18	69	28	9	16	54	91
Control	mCTRL0703	CGAGTATCAGCATGTCGACG	3064	768	93	290	518	2729	163	146	306	24421	156	541	1096	131	246	258	801	145	57	744	741	579	428	1354	2191	851	159	19	697	16575	15	61	12	59	81	7	64	252	88	61	66	7	23	14	558	4	48
Control	mCTRL0704	AGTGCCGGGGGTGTATACCG	2551	176	3	0	8	4	16	3	0	3	1	1	3	44	3	2	14	2	1	6	325	5	4	0	0	6	0	0	2	0	0	0	0	0	1	4	0	1	0	2	0	0	0	3	1	3	0
Control	mCTRL0705	CGGTACCACGCCCCACCTCG	6227	1887	74	61	55	156	16	38	759	148	278	538	1059	71	26	98	46	1499	36	64	39	592	57	81	86	99	1903	104	320	1889	21	19	22	33	703	26	12	1911	41	17485	9	2470	29	1025	39	723	73
Control	mCTRL0706	GTACTGACGTTACGTTCATA	5670	1570	97	46	233	115	9338	79	128	219	299	73	159	504	331	602	1112	629	278	16797	14	198	32	819	236	2441	133	16	23	65	35	28	0	293	146	27	401	19	14	103	44	12	29	28	1908	70	80
Control	mCTRL0707	ACGCAAGCGGAACGCGTCTA	1633	546	76	11	72	20	0	5	342	3	1	111	26	290	0	19	4	2	81	58	144	173	373	72	29	21	105	15	0	3	2	58	155	2	0	1	7	9	0	2	5	4	29	1996	5	0	67
Control	mCTRL0708	GAGCGTCCCGTGATTTAAAG	1806	567	12	13	50	6	0	288	3	64	20	6	3	67	98	56	178	17	0	3	83	4	36	1	176	119	3	31	15	2660	12	5	2	0	173	0	2	1	0	2	11	7	28	1	2	27	0
Control	mCTRL0709	GGTAAAAAGCGTAACGAGTA	974	74	1	3	1	2	15	15	0	1	1	0	3	2	1	3	0	26	0	1	11	0	1	12	9	0	0	0	1	0	3	0	0	0	1	4	0	0	2	0	0	3	0	3	0	0	0
Control	mCTRL0710	CGTGAATCGACCCTCAATAA	2728	719	3	6	49	35	65	13	10	2	430	17	11	28	349	46	276	253	138	8	70	6	67	2	44	22	1	28	19	2	11	1	2	10	1	11	4	9	34	8	1	3	34	2	0	6	51
Control	mCTRL0711	AGAGGCGGAGCAATACTCGC	2189	416	1	0	26	1	63	8	4	3	14	1	13	6	1	4	1	1	1	12	22	0	3	3	3	3	0	2	1	0	2	0	3	1	0	1	2	0	1	0	0	0	0	5	1	2	0
Control	mCTRL0712	TAGAGCAGATCCCCTCAACG	2429	347	164	2821	42	12	32	396	29	2	2	32	1612	7	7	2129	44	261	29	198	23357	9	36	187	2	12	16	14	3	0	1	0	410	6	3	10	2	1	15	2	22	1	6	0	6	23	33
Cramp1l	KY018395	CCGATACCTGAAGTCGTGCC	5163	1200	10	112	148	5129	87	47	102	8	44	124	77	73	390	23	1041	534	43	133	141	67	180	156	186	43	14	18	7	23	17	54	9	154	25	8	20	8	17	174	48	35	185	24	28	27	78
Cramp1l	KY018396	AGAGGGTGGCCGGTGCAAAC	1354	444	44	167	2	41	1	1	14	35	8	21	3	7	70	17	909	20	6	16	3	245	8	38	6	44	3	0	62	1	4	0	0	324	0	3	2	15	68	5	3	6	1	8	41	0	0
Cramp1l	KY018397	TCTGTACTCGTGCCCAAGCG	4709	1407	2	5	15	10	75	8	40	23	14	7	27	202	8	17	17	23	79	15	17	140	25	94	9	47	12	18	9	23	62	5	16	277	58	6	17	31	34	328	103	84	152	48	40	20	182
Cramp1l	KY018398	CCCTTTATAACGTACTGTGG	4172	509	3	32	0	3	7	3	7	6	2	518	1	0	4	6	2	797	5	2	0	2	5	0	8	0	48	3	0	2	0	0	0	0	0	5	1	1	3	0	1	4	2	649	2	0	0
Cramp1l	KY018399	AGCACAGGGTGCGTCCTTCC	2127	926	6	10	13	1	104	47	17	17	22	4	19	18	4	6	20	9	47	20	8	27	40	4961	19	6	7884	85	9	18	113	12	1	261	75	26	2	1	17	17	1	3	4	238	5	2	1
Cramp1l	MGLibA_11814	GGCGAGCTACGCAAGAAGAT	916	159	0	0	0	9	0	0	0	0	0	0	0	0	2	1	0	0	0	0	1	0	5	1	0	2	1	0	0	0	1	2	0	0	0	0	0	0	0	0	0	1	2	0	1	0	0
Cramp1l	MGLibA_11815	AGGTGCGGTAGTAAAAATGC	1275	263	0	0	8	5	11	0	2	0	1	0	3	7	1	14	0	0	58	64	2	0	0	8	2	0	0	0	1	2	2	0	0	0	0	1	0	1	79	1	0	0	3	5	1	2	0
Cramp1l	MGLibA_11816	CTCATACAGTCCCTCGAAGA	1957	401	7	21	17	1335	17	1	3	2	3	234	10	41	11	5	45	2	3	112	3	21	22	3	2	8	0	16	3	0	1	31	16	3	2086	12	506	3	1	1	2	0	151	2	3	2	4
Cramp1l	MGLibB_11813	CGCTCCTCCTCCCGGAACAT	5554	1320	11	424	4	69	911	167	5	14	22	28	5	10	35	156	223	6	86	21	25	92	8	8	6	11	0	0	0	17	2	2	5	3	0	0	11	5	10	0	0	3	171	2	3	5	1
Cramp1l	MGLibB_11814	AAGTCATCCCAGGAACTCTA	1424	274	0	1	8	0	0	2	0	1	19	2	71	1	0	0	0	0	3	2	1	7	9	1	2	3	2	24	4	0	2	3	2	5	0	0	0	0	5	3	2	2	6	0	4	0	2
Cramp1l	MGLibB_11815	TTGTTCTTCACCATGCTTGC	5740	1768	379	1380	1528	716	1340	360	383	465	372	138	272	697	1613	66	945	446	188	2329	774	305	402	1583	1608	406	158	213	780	80	102	197	677	134	609	43	562	46	3879	38	46	36	914	204	75	233	539
Crebbp	KY018465	TGGATATTGCTGTGGACGAA	1864	344	2	0	85	0	29	34	5	0	0	7	3	0	4	0	1	11	1	2	1	2	9	7	0	1	0	0	0	0	0	0	8	1	0	0	0	1	0	0	0	0	1	0	0	13	0
Crebbp	KY018466	AAGTGCCTGGCGTAGCTCCT	3000	358	12	5	17	57	3	0	1	0	7	4	3	19	1421	405	7	9	2	4	60	132	394	15	7	4	0	0	2	0	1	45	0	1	0	0	1	0	0	12	3	0	3	126	1	0	5
Crebbp	KY018467	ACCTACTTTTTTTGCGTGGC	3906	713	30	164	86	178	10	6	231	4	122	0	177	162	28	22	110	362	910	56	3	4	15	11	99	330	600	3	17	3	0	469	98	56	2	7	1	2	10	3	1	17	1	11	9	10	77
Crebbp	KY018468	TTTGCCAGTGAATCGCATGC	3892	1211	344	1716	870	443	534	559	3395	768	4123	352	371	922	538	905	1114	416	2658	669	1339	798	411	1065	87	1085	193	227	113	245	83	825	53	57	836	84	192	665	1458	73	65	164	557	2241	142	25	155
Crebbp	KY018469	GCACTGGTGTTCGAAAAGGC	1461	230	2	52	4	11	2	22	20	2	0	1	3	10	1	46	6	1	0	4	0	0	5	71	8	2	26	0	2	25	16	0	0	0	0	0	0	1	0	0	72	0	6	0	1	0	1
Crebbp	MGLibA_11859	TAACTGGGGGTTCACTCCAG	2818	161	19	5	0	0	2	0	1	5	0	0	73	3	1	2	0	0	2	1	0	3	6	0	6	0	2234	28	2	4	1	0	0	0	0	0	0	0	0	8	0	0	0	2	1	0	1
Crebbp	MGLibA_11860	GGACAACCCTTTAGTCAAAC	1060	247	5	0	0	0	3	0	0	0	0	2	6	0	4	2	0	0	9	1	6	0	0	13	1	22	0	2	0	0	0	0	0	0	0	1	0	0	0	0	86	0	1	2	0	1	4
Crebbp	MGLibA_11861	TTGTTGGTTTCGCTTGTCAC	6339	1688	175	95	434	798	221	1924	4337	874	1178	825	1774	855	781	21821	1434	7050	871	255	1083	502	554	707	43	8540	1522	76	339	1599	494	320	142	121	1737	336	67	231	9455	983	95	244	757	153	621	45	1899
Crebbp	MGLibB_11858	CCATTGGGGATCAGCTCATC	3563	654	7	96	2	136	1267	85	45	3	5	56	10	15	64	65	84	9	10	22	18	3	161	27	345	7	1735	20	0	3	2	1	3	1	4	0	23	1	2	11	0	0	1	249	3	8	1
Crebbp	MGLibB_11859	CACGACAAATCATCTCTCAT	3913	1007	14	379	85	324	1372	48	50	63	164	135	10474	624	5	69	54	240	14	139	36	117	23	21	453	38	13	4	2	10	14	6	19	10	124	592	676	9	812	15	15	67	145	92	7	14	126
Crebbp	MGLibB_11860	CCTGATGAGCTGATCCCCAA	2829	391	12	12	1	48	58	2	0	1255	3	3	9	20	13	635	5	8	209	2	11	1160	7	1	1	183	10	1	32	17	0	0	1	3	0	231	0	2	2	0	61	2	64	1	2	0	5
Csf2	KY018783	GACCCTGCTCGAATATCTTC	2326	1029	14	9	32	892	105	29	94	10	217	17	15	17	362	398	8	19	50	634	327	70	25	298	7	10	1	7	20	4	3	0	27	4	0	386	15	11	2	293	0	6	143	17	214	6	7
Csf2	KY018784	ATATTCGAGCAGGGTCTACG	2217	524	113	37	1496	13	26	14	7	44	112	5	3	67	2	28	4	8	74	8	8	2022	47	81	2	39	1	3	2	3	8	542	13	11	23	4	24	1	1	3	2	0	2	35	2	33	27
Csf2	KY018785	CGCCTGAAGATATTCGAGCA	2103	1051	55	255	672	72	64	69	61	7	0	87	24	34	678	22	10418	24	25	22	23	28	143	67	13	4	0	4	7	154	6503	5	3	2045	6	4	5	57	1	34	515	6	15	259	4	2	3
Csf2	KY018786	AGAGAAGCAGCTTACCTTGA	1820	622	0	68	7	4	245	61	3	3	14	8	195	1	7	244	14	30	33	64	26	6	27	81	443	57	15	0	12	4	7	52	1	26	15	0	1	15	4	4	1	8	2	1	4	1	9
[truncated: 5,782 more rows]
[truncated: 3 more columns]
