# Supplementary material for: In Vivo Epigenetic CRISPR Screen Identifies Asf1a as an Immunotherapeutic Target in Kras -Mutant Lung Adenocarcinoma
Source: Oxford University Press journal article supplement (doi:10.1158/2159-8290.cd-19-0780), 2019-11-19
Supplement: 21598290cd190780-sup-225096_2_supp_5888175_q0mty9.xlsx [file 21598290cd190780-sup-225096_2_supp_5888175_q0mty9.xlsx]

## Sheet: ID-IgG VS IC-IgG
id	num	neg|score	neg|p-value	neg|rank	neg|goodsgrna	neg|lfc	pos|score	pos|p-value	pos|rank	pos|goodsgrna	pos|lfc
Aurkb	7	0.00011982	0.00065807	1	7	-1.304	0.99988	0.99987	727	0	-1.304	0.405002
Crebbp	10	0.00026319	0.0021325	2	8	-1.1954	0.5624	0.56272	383	0	-1.1954	0.436665
Brd4	8	0.00048198	0.0030924	3	7	-0.61748	0.32333	0.32334	212	0	-0.61748	0.651808
Suz12	8	0.00053424	0.0033299	4	8	-0.93247	0.99947	0.99941	726	0	-0.93247	0.523961
Whsc1	10	0.00070586	0.0056554	5	8	-0.91883	0.58947	0.59067	407	0	-0.91883	0.528938
Zmynd8	11	0.00076714	0.0060315	6	7	-0.98299	0.54076	0.54138	368	0	-0.98299	0.50593
Mier1	8	0.00079206	0.0048638	7	8	-1.2225	0.99921	0.9991	725	0	-1.2225	0.428539
Cdc5l	4	0.00083691	0.0033101	8	2	-0.31728	0.55535	0.55471	378	0	-0.31728	0.802582
Chd1	9	0.0012446	0.0086341	9	9	-0.84514	0.99876	0.99875	724	0	-0.84514	0.556657
Dpf2	9	0.0016127	0.011029	10	7	-0.53581	0.39603	0.39329	277	0	-0.53581	0.689771
Csf3	9	0.0017975	0.012108	11	5	-0.15702	0.66474	0.66256	470	0	-0.15702	0.896876
Morf4l1	9	0.0022398	0.014641	12	7	-1.2208	0.61193	0.61002	422	0	-1.2208	0.429045
Ptger3	9	0.0023088	0.014977	13	6	-1.0332	0.90314	0.9012	643	0	-1.0332	0.488625
Phf20	8	0.0024615	0.014502	14	8	-0.84072	0.99754	0.99743	723	0	-0.84072	0.558365
Alg13	10	0.0026386	0.016857	15	5	-0.31728	0.34364	0.34476	230	0	-0.31728	0.802582
Brd9	10	0.002849	0.017936	16	8	-1.1407	0.98086	0.98101	708	0	-1.1407	0.453539
Kat8	5	0.0029035	0.012404	17	4	-0.31728	0.95317	0.95353	683	0	-0.31728	0.802582
Rnf40	9	0.003135	0.019589	18	4	0.50233	0.25488	0.25276	176	0	0.50233	1.4165
Terf2	8	0.0031966	0.018203	19	7	-0.36857	0.048606	0.047307	32	0	-0.36857	0.77455
Elp3	6	0.003342	0.016491	20	4	-0.31728	0.85302	0.85234	613	0	-0.31728	0.802582
Ncoa3	9	0.0047432	0.027456	21	5	-0.27743	0.78154	0.78045	553	0	-0.27743	0.825059
Elmsan1	6	0.0047779	0.022577	22	4	-1.1816	0.35697	0.35701	243	0	-1.1816	0.440862
Mecp2	11	0.0048121	0.030662	23	9	-1.1153	0.37572	0.37451	257	0	-1.1153	0.461595
Alkbh1	10	0.0048728	0.029712	24	7	-0.42867	0.55167	0.55206	376	0	-0.42867	0.742946
Chaf1b	7	0.0049003	0.025566	25	7	-0.31728	0.9951	0.99503	720	0	-0.31728	0.802582
Map3k7	7	0.0055091	0.028366	26	6	-0.70282	0.93881	0.93862	671	0	-0.70282	0.61437
Cbx5	8	0.0057498	0.03082	27	3	-0.076697	0.41145	0.41098	285	0	-0.076697	0.948226
Gars	10	0.0061461	0.036629	28	7	-0.34244	0.78017	0.78073	551	0	-0.34244	0.788706
Satb1	10	0.0061654	0.036669	29	6	-0.79249	0.33692	0.33826	221	0	-0.79249	0.577347
Atad2b	10	0.0062611	0.037183	30	5	-0.051671	0.38086	0.38259	263	0	-0.051671	0.964818
Prdm5	9	0.0066232	0.036362	31	8	-0.84778	0.22437	0.22254	147	0	-0.84778	0.555639
Tgfb3	10	0.0068315	0.040301	32	7	-0.72556	0.98805	0.98805	716	0	-0.72556	0.604762
Chmp4b	9	0.0072352	0.039469	33	7	-0.95733	0.99205	0.99148	719	0	-0.95733	0.515009
Taf9	4	0.0073143	0.025022	34	4	-0.54452	0.97642	0.97589	700	0	-0.54452	0.685619
Kdm4c	10	0.0076476	0.044269	35	7	-0.75579	0.9401	0.93918	672	0	-0.75579
H2-Aa	10	0.0076532	0.044318	36	7	-0.3712	0.38448	0.38612	267	0	-0.3712
Eif6	9	0.0081023	0.043734	37	6	-0.31728	0.49025	0.48812	340	0	-0.31728
H2-Ab1	10	0.0084319	0.04795	38	7	-0.77236	0.52702	0.52809	361	0	-0.77236
Angpt2	10	0.0086842	0.049256	39	7	-0.88434	0.16193	0.16299	107	0	-0.88434
Sp140	6	0.0086996	0.039242	40	5	-0.32228	0.083578	0.082862	55	0	-0.32228
Prmt1	6	0.0087582	0.039578	41	3	-0.31728	0.90211	0.90116	642	0	-0.31728
Dmtf1	9	0.0089177	0.047465	42	5	-0.36185	0.84561	0.84424	603	0	-0.36185
Hdgfl1	10	0.009079	0.051305	43	9	-1.3073	0.9903	0.9903	717	0	-1.3073
Hdac3	6	0.0091808	0.041359	44	4	-0.31728	0.45396	0.45485	314	0	-0.31728
Ehmt1	6	0.0095889	0.042992	45	2	0.31756	0.03017	0.029554	19	1	0.31756
Rsf1	11	0.009705	0.054026	46	9	-1.1123	0.76311	0.76422	535	0	-1.1123
Eed	10	0.010371	0.05745	47	7	-0.39623	0.86359	0.86345	620	0	-0.39623
Ube2v1	9	0.010493	0.054551	48	8	-0.63105	0.94734	0.94624	678	0	-0.63105
Ing2	10	0.010811	0.059785	49	7	-0.31728	0.54827	0.54882	373	0	-0.31728
H2-Q1	9	0.011072	0.057005	50	6	-0.92931	0.87479	0.87318	627	0	-0.92931
Smarcc2	11	0.011451	0.06218	51	7	-0.47157	0.61229	0.6121	425	0	-0.47157
Stk11	10	0.011592	0.06312	52	8	-1.262	0.66188	0.66248	469	0	-1.262
Setdb1	8	0.0117	0.05555	53	7	-1.1075	0.86411	0.86358	621	0	-1.1075
Jmjd4	9	0.011746	0.06026	54	7	-0.86638	0.96138	0.96097	691	0	-0.86638
Sin3b	9	0.011867	0.060765	55	5	-0.041055	0.64921	0.64746	455	0	-0.041055
Phc2	6	0.011963	0.05266	56	6	-0.36344	0.98804	0.98822	715	0	-0.36344
Epc1	8	0.011975	0.056451	57	5	-0.20033	0.46531	0.46535	322	0	-0.20033
Nap1l2	10	0.012188	0.065268	58	8	-0.93281	0.22181	0.22293	143	0	-0.93281
Kat5	9	0.012431	0.063239	59	5	-0.64427	0.19379	0.1923	127	0	-0.64427
Mllt10	9	0.012797	0.064743	60	7	-0.30895	0.64822	0.64657	454	0	-0.30895
Asz1	8	0.012954	0.06027	61	6	-0.47427	0.15519	0.15605	102	0	-0.47427
Baz1b	9	0.013076	0.066257	62	7	-0.95133	0.97092	0.9705	699	0	-0.95133
Stat6	11	0.013114	0.069266	63	9	-1.3717	0.9534	0.95417	684	0	-1.3717
Cdc73	7	0.013121	0.058548	64	5	-0.57721	0.23532	0.23416	157	0	-0.57721
Rps17	3	0.01331	0.034521	65	3	-0.76971	0.98669	0.98671	713	0	-0.76971
L3mbtl2	10	0.013422	0.070354	66	8	-0.76221	0.99726	0.99714	722	0	-0.76221
Il13	10	0.013614	0.071156	67	8	-0.72823	0.45937	0.46023	319	0	-0.72823
Kdr	11	0.013973	0.073155	68	7	-0.8956	0.70279	0.70352	493	0	-0.8956
Thbs1	9	0.014013	0.070334	69	7	-0.56926	0.49128	0.48909	342	0	-0.56926
Mbd1	9	0.014089	0.070691	70	7	-0.32155	0.52664	0.52451	360	0	-0.32155
Hdgfrp3	9	0.014573	0.072699	71	6	-0.79716	0.64423	0.64247	450	0	-0.79716
Nelfa	6	0.015229	0.065525	72	4	-0.68803	0.37755	0.37724	259	0	-0.68803
Ube2i	8	0.015594	0.069958	73	7	-1.0496	0.7197	0.7191	512	0	-1.0496
Smc2	6	0.015655	0.067069	74	4	-0.31728	0.33284	0.3327	218	0	-0.31728
Tnrc18	11	0.015707	0.08028	75	9	-1.1382	0.035483	0.036511	23	1	-1.1382
Ubr7	10	0.016196	0.081447	76	6	-1.0618	0.15836	0.15932	105	0	-1.0618
Cxxc1	7	0.017114	0.072601	77	4	-0.31728	0.89884	0.8996	639	0	-0.31728
Vtcn1	10	0.017305	0.086049	78	6	-0.13601	0.2427	0.24382	169	0	-0.13601
Smn1	10	0.01758	0.086999	79	6	-0.48625	0.3164	0.31776	209	0	-0.48625
Zzz3	10	0.018198	0.089898	80	8	-0.39476	0.23616	0.23737	159	0	-0.39476
Stat5b	10	0.019157	0.093372	81	8	-1.1586	0.51878	0.52002	356	0	-1.1586
Vhl	9	0.019297	0.092026	82	7	-0.45227	0.95158	0.95073	681	0	-0.45227
Smchd1	8	0.019368	0.084327	83	3	-0.31728	0.14648	0.14737	97	0	-0.31728
Hells	9	0.019459	0.092748	84	7	-0.60563	0.98407	0.98319	711	0	-0.60563
Pwwp2b	9	0.01953	0.093115	85	5	-0.66138	0.56341	0.56161	385	0	-0.66138
Kmt2b	4	0.019625	0.06225	86	4	-0.72493	0.98038	0.97993	705	0	-0.72493
Pygo2	10	0.019791	0.095856	87	7	-0.81304	0.58506	0.5863	403	0	-0.81304
Zcwpw1	11	0.020526	0.10057	88	5	-0.0042351	0.39543	0.39432	276	0	-0.0042351
Map3k12	11	0.020538	0.10064	89	7	-0.80469	0.97654	0.97697	701	0	-0.80469
Rbbp7	9	0.020775	0.097568	90	7	-0.45978	0.55492	0.55325	377	0	-0.45978
Npm1	5	0.020847	0.076648	91	4	-0.31728	0.21774	0.21776	141	0	-0.31728
Mbtd1	8	0.020917	0.089651	92	5	-0.31728	0.96029	0.95955	689	0	-0.31728
Tada2a	9	0.021248	0.099418	93	6	-1.1567	0.32875	0.32703	215	0	-1.1567
Atf7ip	10	0.021382	0.10179	94	8	-0.68291	0.76089	0.76142	533	0	-0.68291
Pcgf2	8	0.02156	0.091937	95	4	-0.31728	0.34368	0.34326	231	0	-0.31728
Smyd2	9	0.021617	0.10053	96	5	-0.18541	0.85714	0.85582	616	0	-0.18541
Dpep2	10	0.022469	0.10592	97	7	-0.54452	0.85499	0.85509	615	0	-0.54452
Bahd1	11	0.022472	0.10843	98	9	-0.73367	0.81999	0.82067	581	0	-0.73367
Snapc4	10	0.022765	0.10699	99	7	-0.70631	0.063019	0.063675	41	0	-0.70631
Csf2	10	0.023421	0.10971	100	4	0.2579	0.28506	0.2865	195	0	0.2579
Dnmt1	8	0.023844	0.10057	101	6	-0.31728	0.80417	0.80475	566	0	-0.31728
Trim24	11	0.024175	0.11564	102	7	-1.0062	0.60576	0.60565	418	0	-1.0062
Stat4	9	0.02545	0.11352	103	4	0.38775	0.30549	0.30352	206	0	0.38775
Dnmt3a	11	0.025474	0.12088	104	6	-0.068933	0.28072	0.28046	194	0	-0.068933
Dicer1	10	0.025515	0.11723	105	7	-1.4737	0.73761	0.73806	522	0	-1.4737
Smyd5	10	0.026684	0.12167	106	7	-0.36719	0.43814	0.43931	302	0	-0.36719
Chd7	10	0.026814	0.12211	107	7	-0.76746	0.92741	0.92616	662	0	-0.76746
Orc1	10	0.028672	0.12899	108	6	-0.7031	0.57225	0.57297	389	0	-0.7031
Setd6	11	0.029065	0.13498	109	8	-0.74044	0.94515	0.94622	677	0	-0.74044
Meaf6	7	0.029065	0.11323	110	5	-0.60815	0.16687	0.16525	109	0	-0.60815
Rcc1	5	0.030538	0.10752	111	4	-0.31728	0.9005	0.90014	641	0	-0.31728
Chmp4c	10	0.030729	0.13635	112	6	-0.73255	0.24162	0.2428	167	0	-0.73255
Rps6ka5	9	0.031055	0.1313	113	4	-0.16036	0.79542	0.795	560	0	-0.16036
Kdm2a	10	0.031372	0.13877	114	8	-0.34394	0.043092	0.044457	27	1	-0.34394
Rnf2	11	0.031607	0.14481	115	7	-1.0919	0.92033	0.92134	656	0	-1.0919
Fbxo11	9	0.031779	0.13353	116	5	-0.20885	0.37651	0.37411	258	0	-0.20885
Setmar	10	0.03231	0.14238	117	6	-0.20418	0.44228	0.44306	307	0	-0.20418
Prkaa1	9	0.032377	0.13529	118	7	-1.0924	0.91547	0.91385	651	0	-1.0924
Prr14	10	0.032496	0.14304	119	8	-0.36344	0.94501	0.94399	676	0	-0.36344
Ctcfl	9	0.03279	0.13667	120	4	-0.48263	0.43346	0.43107	297	0	-0.48263
Alkbh3	10	0.032817	0.14405	121	6	-0.2186	0.66606	0.66635	472	0	-0.2186
Aurka	7	0.033039	0.12571	122	5	-0.53975	0.92196	0.92174	658	0	-0.53975
Nap1l4	10	0.033053	0.14483	123	8	-0.63515	0.52309	0.524	358	0	-0.63515
Tdrd3	10	0.034062	0.14822	124	4	-0.059855	0.71366	0.71428	506	0	-0.059855
Kat6b	6	0.03454	0.12198	125	3	0.1443	0.27274	0.27226	189	0	0.1443
Kdm5c	10	0.035015	0.15107	126	6	-0.31728	0.69262	0.69342	484	0	-0.31728
Nat6	10	0.035752	0.15369	127	6	-0.74183	0.84694	0.84736	606	0	-0.74183
Kdm5b	11	0.036967	0.16221	128	6	-0.20698	0.48494	0.48429	335	0	-0.20698
Mbd2	9	0.037071	0.14945	129	4	-0.23336	0.64071	0.63894	447	0	-0.23336
Ttf1	10	0.037132	0.15813	130	8	-0.4242	0.95795	0.95715	687	0	-0.4242
Lrp6	11	0.037382	0.16344	131	7	-0.82641	0.24822	0.24772	172	0	-0.82641
Mis18bp1	6	0.038225	0.1318	132	3	-0.31728	0.81346	0.8125	574	0	-0.31728
Terf1	5	0.038915	0.12717	133	3	-0.31728	0.40759	0.41019	283	0	-0.31728
Lag3	10	0.038947	0.16399	134	7	-0.6279	0.10555	0.10643	65	0	-0.6279
Clock	8	0.039353	0.15121	135	5	-0.64936	0.04325	0.041874	28	0	-0.64936
Rbbp4	9	0.03962	0.15708	136	6	-0.37006	0.36821	0.36565	253	0	-0.37006
Gzmn	9	0.039864	0.15774	137	7	-1.4876	0.65364	0.65185	460	0	-1.4876
H2-D1	9	0.04008	0.15839	138	4	0.20683	0.65705	0.65508	462	0	0.20683
Brd2	5	0.040141	0.12991	139	4	-0.5787	0.93231	0.93301	666	0	-0.5787
Mphosph8	5	0.040972	0.13203	140	4	-0.31728	0.94083	0.94168	673	0	-0.31728
Mfge8	11	0.041529	0.17598	141	7	-0.88522	0.56005	0.56068	379	0	-0.88522
Bmi1	7	0.041571	0.15225	142	4	-0.31728	0.93122	0.93115	664	0	-0.31728
Rpl7	3	0.042062	0.10206	143	3	-0.31728	0.95794	0.95799	686	0	-0.31728
Phf12	8	0.042782	0.16017	144	5	-0.31728	0.93664	0.93583	669	0	-0.31728
Pwwp2a	8	0.04325	0.16139	145	2	-0.3024	0.1948	0.19555	128	0	-0.3024
Caprin2	9	0.043905	0.16972	146	7	-0.35059	0.99141	0.99077	718	0	-0.35059
Bahcc1	11	0.044357	0.18397	147	8	-0.55663	0.91379	0.91429	649	0	-0.55663
Ube2b	8	0.044476	0.16483	148	6	-0.39256	0.65182	0.65237	458	0	-0.39256
Dmap1	7	0.044667	0.16135	149	5	-0.31728	0.71431	0.71465	507	0	-0.31728
Smc3	7	0.044987	0.16225	150	5	-0.31728	0.56258	0.56237	384	0	-0.31728
Mina	11	0.045255	0.18679	151	8	-0.39476	0.70835	0.70903	499	0	-0.39476
Prkab2	10	0.045294	0.18506	152	4	-0.034381	0.34269	0.34385	229	0	-0.034381
Slc26a1	11	0.045961	0.18895	153	6	-0.36286	0.34922	0.34836	236	0	-0.36286
Ptprc	6	0.046019	0.15263	154	4	-1.1663	0.91541	0.914	650	0	-1.1663
Smyd3	11	0.046176	0.18969	155	6	-0.12362	0.87219	0.87325	625	0	-0.12362
Tnfsf4	11	0.047298	0.19291	156	5	1.1561	0.10996	0.11026	69	0	1.1561
Tdo2	10	0.048443	0.19436	157	4	0.18563	0.87498	0.87496	628	0	0.18563
Nfkb2	11	0.048762	0.1968	158	3	0.34773	0.00076714	0.0016477	3	1	0.34773
Yeats2	9	0.049336	0.18575	159	6	-0.31728	0.96248	0.96211	692	0	-0.31728
Baz1a	11	0.049516	0.19895	160	8	-0.67886	0.79387	0.79418	558	0	-0.67886
Lbr	10	0.049644	0.19813	161	5	-0.20254	0.90803	0.9068	645	0	-0.20254
Ptger2	10	0.05124	0.20294	162	7	-0.59674	0.81612	0.81714	576	0	-0.59674
Gtf3c4	7	0.052081	0.1825	163	4	-0.31728	0.23996	0.23892	166	0	-0.31728
Il12a	7	0.052148	0.18272	164	2	0.13831	0.72417	0.7237	515	0	0.13831
Phf8	9	0.052322	0.19456	165	4	0.13587	0.36486	0.3626	250	0	0.13587
Hat1	9	0.052562	0.19512	166	5	-0.51465	0.22336	0.22155	145	0	-0.51465
Uhrf1	7	0.052599	0.18396	167	5	-0.31728	0.2361	0.23492	158	0	-0.31728
Nat10	9	0.052949	0.1962	168	5	-0.31728	0.61301	0.61115	426	0	-0.31728
Polr2d	7	0.053118	0.18542	169	4	-0.31728	0.65839	0.65864	463	0	-0.31728
Psmb8	10	0.05381	0.21083	170	8	-0.7076	0.39787	0.39991	278	0	-0.7076
Arid4b	9	0.053851	0.1987	171	5	-0.57874	0.43422	0.43179	298	0	-0.57874
Jarid2	11	0.054874	0.21369	172	8	-0.32374	0.36158	0.36071	245	0	-0.32374
Sfmbt1	11	0.055014	0.21415	173	7	-0.99205	0.59845	0.59868	412	0	-0.99205
Phf21b	10	0.055196	0.21502	174	6	-0.28522	0.33981	0.34112	224	0	-0.28522
Mael	10	0.055218	0.21508	175	6	-0.34292	0.017305	0.018352	12	1	-0.34292
Phip	10	0.057742	0.22119	176	4	0.097411	0.79903	0.79981	563	0	0.097411
Suv420h1	4	0.057758	0.16394	177	4	-1.1949	0.94224	0.94153	674	0	-1.1949
Bcor	10	0.057864	0.22157	178	6	-0.23642	0.71184	0.71278	505	0	-0.23642
Sf3b3	6	0.058298	0.18234	179	4	-0.31728	0.30735	0.30698	207	0	-0.31728
Pygo1	10	0.058433	0.22308	180	6	-0.31728	0.84848	0.84881	608	0	-0.31728
Chmp5	5	0.058831	0.17159	181	4	-0.31728	0.85176	0.85186	612	0	-0.31728
Men1	9	0.058892	0.21258	182	6	-0.22658	0.43724	0.43481	301	0	-0.22658
Jmjd1c	11	0.058964	0.22537	183	6	-0.36344	0.84335	0.84415	599	0	-0.36344
Kdm6a	10	0.059179	0.22491	184	4	-0.050489	0.29734	0.29866	202	0	-0.050489
Rnf20	8	0.05924	0.20325	185	3	-0.31728	0.35669	0.35664	241	0	-0.31728
Hira	11	0.059415	0.22651	186	8	-0.97051	0.97039	0.97088	698	0	-0.97051
Dot1l	11	0.060038	0.22848	187	4	0.24516	0.47903	0.47852	329	0	0.24516
Ppargc1a	9	0.060241	0.21597	188	6	-0.87121	0.95865	0.95798	688	0	-0.87121
Rere	10	0.060314	0.2278	189	4	0.11443	0.028238	0.029514	18	1	0.11443
Kdm5d	11	0.060319	0.22915	190	8	-0.66513	0.73565	0.73659	519	0	-0.66513
Phf2	11	0.06041	0.22943	191	8	-0.37143	0.97972	0.98017	704	0	-0.37143
Sin3a	9	0.06047	0.21665	192	3	0.5829	0.81196	0.81089	572	0	0.5829
Sp100	8	0.061559	0.20954	193	5	-0.39615	0.23983	0.24035	164	0	-0.39615
Chd2	10	0.06199	0.23179	194	6	-0.70333	0.84435	0.84489	600	0	-0.70333
Prdm14	10	0.064334	0.23765	195	5	-0.034437	0.45534	0.45606	315	0	-0.034437
Phc1	8	0.065969	0.22065	196	3	0.052545	0.83202	0.83202	590	0	0.052545
Brd7	8	0.066621	0.22228	197	5	-0.45211	0.64601	0.64663	453	0	-0.45211
Rpl23a	4	0.06719	0.18286	198	3	-0.31728	0.086613	0.086999	58	0	-0.31728
Gm7030	9	0.067325	0.23546	199	5	-0.89663	0.84537	0.84396	601	0	-0.89663
Ezh2	11	0.067659	0.24878	200	5	-0.01767	0.42022	0.41907	290	0	-0.01767
Setd8	8	0.067743	0.22534	201	6	-0.51726	0.84666	0.84646	605	0	-0.51726
Mr1	10	0.068472	0.2474	202	4	0.15535	0.48218	0.48331	332	0	0.15535
Smarca2	6	0.068688	0.20777	203	2	0.61296	0.52149	0.52253	357	0	0.61296
Tnfrsf4	9	0.069202	0.2404	204	7	-0.58632	0.92514	0.92366	659	0	-0.58632
Phf11b	5	0.070518	0.19579	205	3	-0.018513	0.48325	0.48536	333	0	-0.018513
Mybl1	10	0.071084	0.25352	206	7	-0.23356	0.37814	0.37995	261	0	-0.23356
2610002M06Rik	8	0.071863	0.23584	207	2	0.29499	0.43895	0.439	303	0	0.29499
Traf7	6	0.072626	0.21723	208	3	-0.093117	0.58069	0.58122	398	0	-0.093117
Hdac2	9	0.073139	0.25103	209	6	-0.84072	0.98633	0.9855	712	0	-0.84072
Mgea5	9	0.073735	0.25263	210	5	-0.13436	0.72049	0.71894	513	0	-0.13436
Mrgbp	4	0.07405	0.19416	211	3	-0.47935	0.77999	0.78095	550	0	-0.47935
Jmjd6	9	0.074082	0.25364	212	7	-0.31728	0.82491	0.82356	584	0	-0.31728
Atp6v0c	2	0.074751	0.1296	213	2	-0.31728	0.92525	0.925	660	0	-0.31728
Nt5e	10	0.074795	0.26214	214	7	-1.0452	0.27363	0.27536	192	0	-1.0452
Mgmt	11	0.074834	0.26816	215	6	-0.12517	0.10443	0.10478	64	0	-0.12517
H2-Ob	10	0.075303	0.26351	216	5	-0.079202	0.26521	0.26664	183	0	-0.079202
Cdk9	7	0.075749	0.23918	217	5	-0.3699	0.96561	0.96604	694	0	-0.3699
Mta1	10	0.076095	0.26543	218	7	-0.10386	0.61206	0.61255	423	0	-0.10386
Chrac1	7	0.076936	0.24134	219	5	-0.31728	0.48902	0.48798	339	0	-0.31728
Phf20l1	9	0.077229	0.26178	220	7	-0.33441	0.34874	0.34704	234	0	-0.33441
Havcr2	9	0.079089	0.26629	221	7	-0.67773	0.98708	0.98623	714	0	-0.67773
Npcd	6	0.079248	0.23314	222	5	-0.81156	0.76789	0.76679	541	0	-0.81156
Prdm13	11	0.080064	0.28218	223	4	-0.51408	0.91987	0.92077	654	0	-0.51408
Ing4	8	0.080941	0.25738	224	4	-0.31728	0.516	0.51565	353	0	-0.31728
Ncor2	9	0.081692	0.27293	225	5	-0.3704	0.26449	0.26217	182	0	-0.3704
Cxcl10	9	0.082803	0.27606	226	5	-0.30845	0.57529	0.57317	392	0	-0.30845
Mum1	10	0.083861	0.28357	227	4	0.25542	0.75189	0.75235	525	0	0.25542
Phf6	7	0.084451	0.25647	228	4	-0.31728	0.68252	0.68189	481	0	-0.31728
Epas1	11	0.084795	0.29459	229	4	0.083811	0.2976	0.2967	203	0	0.083811
H2-Q10	8	0.085192	0.26729	230	5	-0.14116	0.45752	0.45751	316	0	-0.14116
Ciita	9	0.085462	0.28242	231	6	-0.31728	0.13161	0.13032	84	0	-0.31728
Kir3dl2	8	0.085549	0.268	232	3	0.28526	0.35517	0.35515	240	0	0.28526
Paxip1	9	0.086286	0.28438	233	5	-0.29235	0.89748	0.8956	638	0	-0.29235
Kat2b	10	0.086872	0.29064	234	5	-0.31728	0.69931	0.70053	489	0	-0.31728
Taf12	7	0.087332	0.26269	235	4	-0.34606	0.19647	0.19565	129	0	-0.34606
Psma3	4	0.087798	0.21604	236	3	-0.34102	0.20218	0.20198	132	0	-0.34102
Rbbp5	9	0.088409	0.28965	237	5	-0.28341	0.73741	0.7362	521	0	-0.28341
Satb2	10	0.088748	0.29472	238	7	-1.1375	0.90868	0.90734	646	0	-1.1375
Sirt3	11	0.089035	0.30521	239	6	-0.43546	0.49244	0.49194	343	0	-0.43546
Chaf1a	6	0.089287	0.25647	240	4	-0.61999	0.86258	0.86199	619	0	-0.61999
Mier2	11	0.090102	0.30784	241	4	0.45994	0.20944	0.20871	137	0	0.45994
Areg	9	0.090911	0.29559	242	3	0.59613	0.44249	0.44032	308	0	0.59613
Smarcd2	10	0.092162	0.30262	243	7	-0.71955	0.3754	0.37711	256	0	-0.71955
Sap130	11	0.092311	0.3132	244	7	-0.39476	0.98063	0.98112	706	0	-0.39476
Ehmt2	10	0.092859	0.3039	245	6	-0.36875	0.81733	0.81835	577	0	-0.36875
Hmgn5	9	0.095782	0.30551	246	4	0.20464	0.49949	0.49747	347	0	0.20464
Jak3	11	0.09606	0.32243	247	5	-0.1581	0.54227	0.5429	370	0	-0.1581
Atrx	8	0.096414	0.29266	248	4	-0.31728	0.17614	0.17696	116	0	-0.31728
Padi4	10	0.096675	0.3127	249	6	-0.35362	0.40752	0.40943	282	0	-0.35362
Entpd1	10	0.097688	0.31475	250	7	-0.68356	0.35501	0.35618	239	0	-0.68356
Tdrd6	10	0.098215	0.31595	251	7	-0.95688	0.17728	0.17827	117	0	-0.95688
Epc2	8	0.098705	0.29749	252	2	0.23427	0.4666	0.46658	323	0	0.23427
Hmgn3	8	0.099724	0.29969	253	5	-0.66208	0.68208	0.68268	480	0	-0.66208
Ccnt2	10	0.1005	0.32112	254	6	-0.1105	0.90622	0.9051	644	0	-0.1105
Smc1b	11	0.10304	0.33946	255	6	-0.26452	0.84163	0.84265	597	0	-0.26452
Kif11	7	0.10341	0.29335	256	5	-0.77072	0.23299	0.23189	154	0	-0.77072
Fbxl19	11	0.10417	0.34226	257	7	-0.61058	0.49492	0.49424	345	0	-0.61058
Baz2a	10	0.10429	0.33	258	6	-0.092418	0.072189	0.07267	46	0	-0.092418
Kdm1b	11	0.10458	0.3432	259	7	-0.7791	0.33876	0.3377	223	0	-0.7791
H2-Q2	10	0.10555	0.33284	260	5	-0.098503	0.81793	0.81888	578	0	-0.098503
Piwil4	11	0.1059	0.34612	261	8	-0.42283	0.96683	0.96754	696	0	-0.42283
Nfkb1	10	0.10623	0.33442	262	7	-0.44096	0.99667	0.9965	721	0	-0.44096
Stk31	7	0.10626	0.29881	263	5	-0.37871	0.88523	0.88584	632	0	-0.37871
Prdm4	10	0.10738	0.33691	264	5	0.010193	0.63295	0.63343	441	0	0.010193
Scml2	8	0.10759	0.31629	265	6	-0.39999	0.83756	0.83735	594	0	-0.39999
Hdac10	11	0.10858	0.35218	266	3	0.51174	0.29982	0.29904	204	0	0.51174
Tcf19	11	0.10867	0.35233	267	8	-0.66987	0.080538	0.081032	52	0	-0.66987
H2-Q4	9	0.11079	0.33343	268	6	-0.87054	0.71105	0.70987	502	0	-0.87054
Cml1	8	0.11091	0.32364	269	3	0.014436	0.50223	0.50217	348	0	0.014436
Chd1l	10	0.11174	0.34596	270	7	-0.73245	0.9807	0.98084	707	0	-0.73245
Set	4	0.11342	0.25695	271	3	-0.52092	0.87997	0.88016	630	0	-0.52092
Ino80	8	0.11418	0.33072	272	4	-0.31728	0.65491	0.65562	461	0	-0.31728
Ccl5	9	0.11501	0.3411	273	6	-0.08102	0.27305	0.27099	190	0	-0.08102
Cbx4	10	0.11541	0.35359	274	7	-0.56679	0.92541	0.92427	661	0	-0.56679
Smarcd1	10	0.11552	0.35382	275	7	-0.31061	0.62553	0.626	433	0	-0.31061
Hltf	8	0.11559	0.33359	276	6	-0.42877	0.11086	0.11157	71	0	-0.42877
4632428N05Rik	11	0.11578	0.36752	277	5	0.41239	0.22905	0.22809	151	0	0.41239
Kdm7a	6	0.11586	0.30988	278	4	-0.35035	0.48601	0.48693	336	0	-0.35035
Cbx7	8	0.11655	0.33554	279	6	-1.0531	0.9164	0.91566	653	0	-1.0531
Smndc1	4	0.11732	0.26268	280	3	-0.31728	0.2854	0.28348	197	0	-0.31728
Sap18	6	0.11895	0.3144	281	4	-0.58228	0.38428	0.38433	266	0	-0.58228
Carm1	5	0.12037	0.29397	282	2	-0.31728	0.5506	0.55194	375	0	-0.31728
Rpl9	1	0.12118	0.12181	283	1	-0.31728	0.87882	0.87957	629	0	-0.31728
Brd8	7	0.12158	0.32791	284	3	-0.31728	0.27329	0.27296	191	0	-0.31728
Scmh1	10	0.12169	0.36681	285	7	-0.58726	0.89432	0.89371	636	0	-0.58726
L3mbtl3	9	0.12187	0.35317	286	6	-0.48062	0.5937	0.59149	408	0	-0.48062
Ctnnb1	8	0.1233	0.34926	287	4	-0.13384	0.79902	0.7993	562	0	-0.13384
Yeats4	8	0.12367	0.3501	288	5	-0.31728	0.24421	0.24457	170	0	-0.31728
Wnk1	8	0.12581	0.3543	289	5	-0.31728	0.36499	0.36469	251	0	-0.31728
Ccdc79	11	0.12727	0.38834	290	5	-0.31728	0.62758	0.62767	434	0	-0.31728
Eif3a	7	0.12939	0.34163	291	4	-0.31728	0.24612	0.24501	171	0	-0.31728
Smc4	5	0.12986	0.31133	292	3	-0.31728	0.43151	0.43343	296	0	-0.31728
Psmd1	9	0.12997	0.36758	293	6	-0.36149	0.055707	0.056253	34	0	-0.36149
Asxl1	10	0.13047	0.38489	294	4	0.81892	0.12306	0.12368	80	0	0.81892
Chmp2a	6	0.1308	0.33287	295	4	-0.31728	0.63257	0.63248	440	0	-0.31728
Jmjd7	10	0.13087	0.38589	296	7	-1.7	0.95436	0.95349	685	0	-1.7
Tcf7l1	10	0.13134	0.38694	297	4	-0.10476	0.35689	0.35791	242	0	-0.10476
Pax5	10	0.1317	0.38776	298	3	0.14741	0.91108	0.90964	648	0	0.14741
Sirt7	9	0.1325	0.37218	299	3	0.13825	0.60976	0.60761	421	0	0.13825
Myc	7	0.13281	0.34808	300	4	-0.31728	0.14576	0.14537	96	0	-0.31728
Mecom	8	0.1338	0.37091	301	3	0.16991	0.66145	0.66238	467	0	0.16991
Prdm16	10	0.13513	0.39403	302	7	-0.45732	0.10302	0.10372	62	0	-0.45732
Prmt8	9	0.13534	0.37698	303	5	-0.25058	0.57588	0.57392	393	0	-0.25058
Chd5	10	0.1366	0.39669	304	5	-0.31728	0.19925	0.19984	131	0	-0.31728
Mysm1	8	0.13739	0.37761	305	5	-0.31728	0.97777	0.97704	703	0	-0.31728
Myb	9	0.13802	0.38144	306	5	-0.3882	0.61678	0.61493	429	0	-0.3882
Mbd5	10	0.13904	0.40134	307	5	-0.24721	0.43648	0.43781	300	0	-0.24721
Cd274	11	0.14012	0.41052	308	7	-0.75852	0.22419	0.22364	146	0	-0.75852
Prdm9	10	0.14091	0.40491	309	6	-0.31728	0.78477	0.78552	555	0	-0.31728
Rbm14	11	0.14095	0.41186	310	5	0.33639	0.92002	0.921	655	0	0.33639
Tdrd7	10	0.14148	0.40591	311	4	0.22738	0.90981	0.90834	647	0	0.22738
H2-Oa	10	0.14382	0.41013	312	3	0.76426	0.22736	0.22837	149	0	0.76426
Prmt5	5	0.14588	0.34049	313	3	-0.31728	0.57718	0.57842	395	0	-0.31728
Dnmt3l	9	0.147	0.39767	314	4	0.2848	0.080475	0.079646	51	0	0.2848
Jmjd8	9	0.1486	0.40026	315	5	-0.0545	0.88472	0.88319	631	0	-0.0545
Phc3	9	0.14928	0.40132	316	6	-0.39919	0.42277	0.42061	293	0	-0.39919
Gsg2	8	0.14984	0.39911	317	4	-0.31728	0.36198	0.36156	246	0	-0.31728
Supt7l	9	0.15125	0.40454	318	5	-0.8711	0.4954	0.49312	346	0	-0.8711
Smad2	8	0.15231	0.4028	319	5	-0.16605	0.29671	0.29735	200	0	-0.16605
Ep400	10	0.15236	0.42623	320	5	-0.20938	0.83412	0.83443	591	0	-0.20938
Taf8	8	0.15535	0.40723	321	4	-0.025466	0.057121	0.056015	37	0	-0.025466
Hemk1	10	0.15757	0.43546	322	5	0.0292	0.8023	0.80315	564	0	0.0292
Setd1a	8	0.15824	0.4111	323	5	-0.31728	0.82413	0.82426	582	0	-0.31728
Braf	9	0.15967	0.41877	324	3	0.193	0.48783	0.48561	337	0	0.193
Arid1b	10	0.15973	0.43971	325	6	-0.65711	0.37082	0.37227	254	0	-0.65711
Smad6	11	0.16272	0.44804	326	2	0.052824	0.064775	0.064654	42	0	0.052824
Arnt2	6	0.16306	0.38112	327	4	-0.80653	0.36331	0.36341	248	0	-0.80653
Smad1	10	0.16312	0.44608	328	3	0.3337	0.18428	0.18501	122	0	0.3337
Mbd4	9	0.16428	0.42712	329	5	-0.054426	0.8549	0.8535	614	0	-0.054426
Chd6	10	0.16455	0.44853	330	6	-0.31728	0.74135	0.74213	523	0	-0.31728
Trdmt1	11	0.16729	0.45558	331	6	-0.46234	0.77839	0.77928	549	0	-0.46234
Tet1	11	0.16929	0.4588	332	6	-0.35355	0.68123	0.68121	478	0	-0.35355
Egfr	11	0.17016	0.46022	333	6	-0.40729	0.83608	0.83706	592	0	-0.40729
Uty	10	0.17063	0.45965	334	5	-0.31728	0.76434	0.76491	537	0	-0.31728
Akap1	11	0.17242	0.46415	335	5	-0.36498	0.76966	0.77088	544	0	-0.36498
Tdrd12	7	0.1734	0.41859	336	5	-0.31728	0.98104	0.98139	709	0	-0.31728
Gm10094	5	0.17386	0.38893	337	4	-0.55675	0.80981	0.81039	570	0	-0.55675
Btg3	7	0.17722	0.42479	338	4	-0.57008	0.58514	0.58422	404	0	-0.57008
Fos	10	0.17728	0.46928	339	4	-0.059176	0.27153	0.27334	187	0	-0.059176
H2-DMa	6	0.18057	0.40616	340	3	0.15415	0.77353	0.77238	547	0	0.15415
Alkbh2	8	0.18083	0.44283	341	5	-0.31728	0.28929	0.28974	199	0	-0.31728
Rnase12	9	0.18126	0.45409	342	4	0.21041	0.41579	0.41311	289	0	0.21041
Ccl17	9	0.18234	0.45561	343	6	-0.6537	0.2597	0.25748	179	0	-0.6537
Suv420h2	9	0.18274	0.45631	344	5	-0.74611	0.46306	0.46092	320	0	-0.74611
Jun	9	0.1828	0.45646	345	6	-0.31883	0.51024	0.50807	350	0	-0.31883
Brca2	9	0.18347	0.45772	346	4	-0.31728	0.45799	0.45585	317	0	-0.31728
Hdac1	7	0.18398	0.43549	347	5	-0.61579	0.89091	0.89165	635	0	-0.61579
Smad7	10	0.18435	0.47894	348	5	-0.092011	0.44475	0.44556	310	0	-0.092011
Prdm8	11	0.18557	0.48436	349	7	-0.18007	0.85004	0.85106	610	0	-0.18007
Brdt	10	0.18602	0.48115	350	5	-0.21105	0.41531	0.41688	288	0	-0.21105
Kat6a	6	0.1865	0.41478	351	4	-1.6619	0.33701	0.33717	222	0	-1.6619
Polr2b	7	0.18762	0.44149	352	4	-0.31728	0.13028	0.12993	81	0	-0.31728
Fto	10	0.1917	0.4888	353	6	-0.40307	0.16312	0.16437	108	0	-0.40307
Bptf	7	0.19242	0.44956	354	2	0.013492	0.27254	0.27217	188	0	0.013492
Stat3	11	0.19291	0.49619	355	6	-0.18357	0.5779	0.57808	397	0	-0.18357
Rps19	5	0.19332	0.41837	356	3	-0.31728	0.82536	0.82631	585	0	-0.31728
Ccnt1	10	0.19449	0.49251	357	6	-0.40729	0.98133	0.98131	710	0	-0.40729
Brpf1	10	0.19487	0.49301	358	6	-0.35269	0.56107	0.56131	381	0	-0.35269
Smarca5	8	0.19526	0.46325	359	5	-0.31728	0.65137	0.65191	457	0	-0.31728
Prkaa2	10	0.19696	0.49574	360	3	0.017736	0.59383	0.5949	410	0	0.017736
Ash1l	10	0.19734	0.49618	361	6	-0.37708	0.68382	0.68489	482	0	-0.37708
Huwe1	5	0.19759	0.42287	362	2	-0.31728	0.69268	0.69322	485	0	-0.31728
Hdac6	11	0.19909	0.50581	363	6	-0.17274	0.10858	0.10895	68	0	-0.17274
Hif1an	9	0.2	0.48377	364	5	-0.31728	0.64373	0.64205	449	0	-0.31728
Cd80	11	0.20048	0.50802	365	7	-0.38953	0.12095	0.12076	78	0	-0.38953
H2-DMb2	10	0.20197	0.50241	366	3	-0.0026139	0.56041	0.56064	380	0	-0.0026139
Brpf3	8	0.20216	0.47275	367	5	-0.095319	0.60838	0.60875	420	0	-0.095319
Prmt3	10	0.20267	0.50327	368	3	0.46645	0.62897	0.62963	435	0	0.46645
Hdac9	11	0.20318	0.51206	369	6	-0.25938	0.67355	0.67354	473	0	-0.25938
Brd1	9	0.2041	0.48983	370	4	-0.034876	0.39201	0.38929	273	0	-0.034876
Prmt10	10	0.20703	0.50929	371	5	0.091194	0.26627	0.26777	184	0	0.091194
Nkx2-1	11	0.20747	0.51819	372	7	-0.48491	0.3626	0.36155	247	0	-0.48491
Smarcad1	9	0.2082	0.49604	373	5	-0.34451	0.34185	0.34	228	0	-0.34451
Brca1	11	0.21012	0.5224	374	6	-0.31649	0.80387	0.80454	565	0	-0.31649
Cxcr4	11	0.21294	0.52665	375	7	-0.98309	0.30093	0.3	205	0	-0.98309
Cbx1	9	0.21328	0.50363	376	4	-0.041164	0.47734	0.47512	328	0	-0.041164
Prkab1	9	0.21596	0.50761	377	3	1.0789	0.37816	0.37575	262	0	1.0789
Eng	10	0.21622	0.52185	378	3	0.10699	0.45373	0.45433	313	0	0.10699
Ruvbl1	9	0.21733	0.50967	379	2	0.081976	0.81922	0.81787	579	0	0.081976
Klrk1	7	0.21887	0.49072	380	3	-0.14672	0.84769	0.84826	607	0	-0.14672
Chmp1b	6	0.21976	0.46014	381	3	-0.45894	0.8404	0.83945	596	0	-0.45894
Gatad2a	11	0.22307	0.54138	382	6	-0.19049	0.25529	0.25447	177	0	-0.19049
Cd40	9	0.22532	0.52153	383	4	-0.27309	0.90027	0.89822	640	0	-0.27309
Cd4	10	0.22782	0.53674	384	6	-0.63092	0.70679	0.70789	495	0	-0.63092
Setd2	9	0.22851	0.52664	385	4	-0.31728	0.42199	0.41984	292	0	-0.31728
Rpl7a	5	0.22872	0.4573	386	3	-0.31728	0.38333	0.38602	265	0	-0.31728
Kmt2a	6	0.22933	0.47322	387	2	0.093439	0.70773	0.70707	497	0	0.093439
Setd3	9	0.22993	0.52882	388	4	0.29578	0.35472	0.35298	238	0	0.29578
Kdm4d	10	0.23067	0.54026	389	5	-0.31728	0.092848	0.092926	59	0	-0.31728
Hmg20b	11	0.23242	0.5555	390	5	0.53664	0.032508	0.033473	21	1	0.53664
Pbrm1	8	0.23435	0.51514	391	4	-0.31728	0.57737	0.57704	396	0	-0.31728
Gfi1b	9	0.23443	0.53568	392	5	-0.040548	0.21733	0.21547	140	0	-0.040548
Atad2	10	0.23456	0.54529	393	4	0.26473	0.26097	0.26205	180	0	0.26473
Suds3	7	0.2361	0.51247	394	3	-0.3934	0.34915	0.3492	235	0	-0.3934
Kat2a	11	0.23665	0.56153	395	6	-0.27589	0.53006	0.53026	362	0	-0.27589
Suv39h2	11	0.2373	0.56237	396	5	-0.17536	0.15973	0.15943	106	0	-0.17536
G2e3	9	0.23744	0.53993	397	4	-0.20985	0.23927	0.23703	163	0	-0.20985
Chd8	11	0.23824	0.56395	398	7	-0.12587	0.76476	0.76592	538	0	-0.12587
H2-Q7	6	0.23938	0.48701	399	4	-0.31728	0.7178	0.7164	511	0	-0.31728
Mybl2	5	0.24435	0.47383	400	3	-0.31728	0.93794	0.93881	670	0	-0.31728
Psmb9	11	0.24466	0.57319	401	5	-0.25709	0.40124	0.40019	280	0	-0.25709
Mllt6	10	0.24487	0.55869	402	5	-0.30996	0.84565	0.8463	604	0	-0.30996
Noc4l	2	0.24499	0.37577	403	1	-0.31728	0.38325	0.38174	264	0	-0.31728
Smarcd3	11	0.2475	0.57732	404	6	-0.40395	0.81442	0.81513	575	0	-0.40395
Rcor2	9	0.24779	0.5547	405	4	-0.31728	0.075802	0.075074	47	0	-0.31728
Taf3	9	0.25037	0.55843	406	5	-0.31728	0.95175	0.95087	682	0	-0.31728
Hr	9	0.25071	0.55889	407	4	-0.17336	0.76682	0.76601	540	0	-0.17336
Rpl32	4	0.25077	0.45301	408	3	-0.31728	0.7006	0.69971	490	0	-0.31728
Dpf1	10	0.25166	0.56699	409	6	-0.38424	0.38897	0.39074	272	0	-0.38424
Ints12	9	0.25197	0.56059	410	4	-0.15772	0.46738	0.46569	324	0	-0.15772
Stat2	11	0.25292	0.58454	411	6	-0.66825	0.32708	0.32665	213	0	-0.66825
Arg1	11	0.25501	0.58754	412	6	-0.60439	0.70785	0.70845	498	0	-0.60439
Dimt1	8	0.25547	0.54153	413	4	-0.27597	0.49121	0.49116	341	0	-0.27597
Dxo	6	0.25589	0.50857	414	3	-0.08616	0.8313	0.83075	589	0	-0.08616
Hspbap1	9	0.25624	0.56572	415	5	-0.26812	0.24906	0.24653	173	0	-0.26812
Asf1a	8	0.25967	0.54703	416	5	-0.22011	0.42327	0.42249	294	0	-0.22011
Phf19	11	0.26158	0.59738	417	6	-1.0138	0.75081	0.75191	524	0	-1.0138
Rnf17	11	0.26347	0.59988	418	3	0.43539	0.7627	0.76374	534	0	0.43539
Adora3	6	0.26423	0.51919	419	2	0.19429	0.47043	0.47195	326	0	0.19429
Chd4	9	0.26479	0.57445	420	5	-0.31728	0.70475	0.70344	494	0	-0.31728
Mllt1	10	0.26507	0.583	421	5	-0.34993	0.25028	0.25141	175	0	-0.34993
Nap1l3	10	0.26521	0.58314	422	6	-0.3693	0.28609	0.2874	198	0	-0.3693
Ep300	11	0.26784	0.60598	423	7	-0.53665	0.93647	0.93776	668	0	-0.53665
Hdac11	10	0.27029	0.58944	424	4	0.94767	0.14996	0.15113	99	0	0.94767
Smyd4	10	0.27031	0.58946	425	4	0.78538	0.002091	0.0032607	4	1	0.78538
Nhs	11	0.27192	0.61139	426	6	-0.09446	0.37772	0.37646	260	0	-0.09446
Gm8909	11	0.27321	0.61299	427	6	-0.11832	0.28525	0.28434	196	0	-0.11832
Glt28d2	8	0.27817	0.56991	428	3	0.61705	0.39222	0.39179	274	0	0.61705
Prdm10	10	0.27915	0.60021	429	6	-0.31728	0.5414	0.54213	369	0	-0.31728
Ube2e1	10	0.28086	0.6022	430	5	-0.14808	0.81306	0.81395	573	0	-0.14808
Cbx8	9	0.28093	0.59117	431	5	-0.33442	0.37237	0.37025	255	0	-0.33442
Taf5	7	0.28216	0.56055	432	4	-0.31728	0.66072	0.66107	465	0	-0.31728
Msl3	6	0.28422	0.54415	433	2	0.37125	0.070265	0.069464	44	0	0.37125
Cdyl	11	0.28756	0.6277	434	6	-0.44608	0.94866	0.94975	679	0	-0.44608
Phf7	7	0.29218	0.57072	435	2	0.11136	0.8869	0.88755	634	0	0.11136
Zmynd11	9	0.29451	0.60499	436	2	1.0815	0.10807	0.10744	67	0	1.0815
Nat9	8	0.29926	0.59539	437	4	-0.18326	0.83013	0.83001	587	0	-0.18326
Phf1	10	0.29937	0.6233	438	4	0.33207	0.41359	0.4152	287	0	0.33207
Rel	9	0.30367	0.61411	439	4	0.28849	0.7009	0.69968	491	0	0.28849
Ezh1	11	0.30422	0.6437	440	6	-0.39095	0.2681	0.26754	186	0	-0.39095
Kdm6b	10	0.30536	0.63044	441	6	-0.19614	0.70864	0.7096	500	0	-0.19614
Aire	8	0.30838	0.60619	442	4	-0.31728	0.24246	0.24294	168	0	-0.31728
Ncor1	8	0.30842	0.60623	443	5	-0.34567	0.96299	0.96231	693	0	-0.34567
Dpep3	9	0.31128	0.62148	444	4	0.20895	0.34012	0.33819	225	0	0.20895
Pml	11	0.31224	0.65156	445	6	-0.4774	0.8087	0.80943	567	0	-0.4774
Ube2n	3	0.31413	0.46616	446	2	-0.31728	0.70249	0.70348	492	0	-0.31728
Prdm12	7	0.31828	0.597	447	4	-0.55042	0.35386	0.35408	237	0	-0.55042
Hdac4	11	0.31857	0.65744	448	4	0.61293	0.72254	0.7233	514	0	0.61293
Cd70	11	0.32036	0.65925	449	3	0.51056	0.76885	0.77004	542	0	0.51056
Nos2	11	0.32062	0.65954	450	6	-0.18065	0.022031	0.023122	14	1	-0.18065
Asxl2	5	0.32128	0.55404	451	2	0.17352	0.69485	0.69543	487	0	0.17352
Phf11c	5	0.32789	0.56085	452	3	-0.2401	0.53946	0.54055	366	0	-0.2401
Nsd1	9	0.32794	0.63837	453	5	-0.21867	0.4395	0.43715	305	0	-0.21867
L3mbtl1	10	0.33518	0.66346	454	6	-0.251	0.76923	0.76999	543	0	-0.251
Tada3	11	0.3356	0.67408	455	6	-0.28694	0.94303	0.94422	675	0	-0.28694
Slc38a1	9	0.33858	0.64878	456	4	-0.13245	0.87037	0.86896	624	0	-0.13245
Gm6251	6	0.3389	0.61125	457	3	-0.19691	0.078898	0.07833	48	0	-0.19691
Msh6	10	0.34173	0.6709	458	3	0.37655	0.75308	0.75342	526	0	0.37655
Kdm3a	10	0.3418	0.67095	459	6	-0.28314	0.47987	0.48096	330	0	-0.28314
Arid1a	11	0.34247	0.68042	460	6	-0.17537	0.20572	0.20503	135	0	-0.17537
Fxyd1	9	0.34271	0.65252	461	3	-0.062946	0.15352	0.15155	101	0	-0.062946
H2-T23	10	0.34385	0.67343	462	4	-0.41283	0.96655	0.96664	695	0	-0.41283
Ccl12	7	0.3443	0.62227	463	4	-0.24522	0.51428	0.51331	352	0	-0.24522
Mta2	10	0.34496	0.67478	464	4	0.38525	0.5729	0.57366	390	0	0.38525
Dnajc1	9	0.34511	0.65484	465	5	-0.31728	0.76613	0.76544	539	0	-0.31728
H2-M3	9	0.3453	0.65502	466	4	0.1794	0.47025	0.46857	325	0	0.1794
Phf23	7	0.34594	0.62415	467	3	-0.31728	0.43089	0.42987	295	0	-0.31728
Prdm15	11	0.34818	0.68593	468	4	0.88354	0.31846	0.31783	211	0	0.88354
Cd28	11	0.35024	0.68788	469	6	-0.17587	0.81074	0.8115	571	0	-0.17587
Senp3	10	0.35226	0.68305	470	4	-0.14929	0.60667	0.60697	419	0	-0.14929
Tcf20	11	0.35272	0.69004	471	6	-0.022763	0.75724	0.75851	529	0	-0.022763
Phf10	10	0.35317	0.68404	472	5	-0.12595	0.36435	0.36552	249	0	-0.12595
Grn	10	0.35359	0.68445	473	5	-0.01561	0.14148	0.14295	92	0	-0.01561
Smarce1	8	0.35477	0.65812	474	5	-0.16888	0.18552	0.18627	123	0	-0.16888
Sp110	8	0.35803	0.66196	475	4	-0.31531	0.34058	0.34035	226	0	-0.31531
Nap1l5	10	0.35874	0.68991	476	5	-0.23065	0.86451	0.86431	622	0	-0.23065
Cd40lg	8	0.36424	0.66827	477	2	0.32774	0.68696	0.6875	483	0	0.32774
Phf11d	4	0.36492	0.56949	478	2	-0.31728	0.014156	0.014661	10	1	-0.31728
Dnmt3b	11	0.36534	0.70094	479	5	0.22166	0.6344	0.63436	442	0	0.22166
Tcf3	11	0.3659	0.70155	480	3	0.37525	0.070535	0.070146	45	0	0.37525
Sirt2	11	0.36615	0.70181	481	5	-0.017768	0.71626	0.71723	509	0	-0.017768
Grhl1	9	0.37071	0.67847	482	4	0.0449	0.059281	0.059271	39	0	0.0449
Setdb2	10	0.37082	0.70244	483	2	0.21815	0.33403	0.33559	219	0	0.21815
Taf1	8	0.37331	0.67486	484	4	-0.31728	0.22299	0.22349	144	0	-0.31728
Il2	9	0.37403	0.6815	485	4	0.40682	0.83655	0.83476	593	0	0.40682
Brwd1	8	0.37459	0.67573	486	4	-0.13417	0.24944	0.25008	174	0	-0.13417
Foxp3	10	0.37489	0.70666	487	6	-0.33291	0.53514	0.53579	363	0	-0.33291
Mta3	9	0.37995	0.68712	488	4	0.42334	0.20307	0.20116	133	0	0.42334
Kras	5	0.38006	0.61417	489	3	-0.31728	0.84197	0.84218	598	0	-0.31728
Dido1	11	0.38327	0.71692	490	6	-0.35621	0.62128	0.62129	431	0	-0.35621
Ccr4	10	0.38439	0.7139	491	5	0.048046	0.048443	0.049464	31	1	0.048046
Ednrb	11	0.38581	0.719	492	6	-0.71432	0.67521	0.6752	474	0	-0.71432
Smarcal1	10	0.38628	0.71534	493	4	0.076895	0.58253	0.58392	400	0	0.076895
Wt1	10	0.38668	0.7157	494	3	0.24684	0.72652	0.72722	516	0	0.24684
Adora1	11	0.39251	0.725	495	3	0.72078	0.59374	0.59388	409	0	0.72078
Il4	8	0.39271	0.68961	496	2	0.36354	0.76081	0.76095	532	0	0.36354
Jade2	6	0.39361	0.65406	497	3	-0.80504	0.64156	0.64146	448	0	-0.80504
Smarca4	9	0.39397	0.69982	498	2	1.0421	0.022993	0.023537	15	1	1.0421
Phf3	11	0.39516	0.72748	499	5	-0.36645	0.78264	0.78322	554	0	-0.36645
Nat8	9	0.39561	0.70156	500	5	-0.4559	0.58458	0.58266	402	0	-0.4559
Mbd6	10	0.39793	0.72359	501	4	0.13172	0.75663	0.75689	528	0	0.13172
Cxcl12	9	0.39848	0.70407	502	5	-0.28607	0.886	0.88433	633	0	-0.28607
Arid2	10	0.39966	0.7249	503	5	-0.14147	0.63125	0.63183	438	0	-0.14147
Tgfb2	8	0.39999	0.69495	504	4	-0.19784	0.39869	0.39829	279	0	-0.19784
Rela	10	0.40266	0.72692	505	3	0.26857	0.14026	0.14192	89	0	0.26857
Proc	9	0.40799	0.7131	506	5	-0.49446	0.061657	0.061616	40	0	-0.49446
Tgfb1	11	0.41364	0.74328	507	5	0.01961	0.64591	0.64616	452	0	0.01961
Phf14	9	0.41438	0.71875	508	5	-0.33892	0.48852	0.48635	338	0	-0.33892
Setd1b	6	0.42091	0.67377	509	3	0.31715	0.71545	0.71427	508	0	0.31715
Pdcd1lg2	11	0.42106	0.74963	510	5	0.24119	0.14121	0.14029	91	0	0.24119
Arid4a	11	0.42254	0.75095	511	5	0.037098	0.015998	0.016917	11	1	0.037098
H2-DMb1	9	0.42311	0.72666	512	5	-0.39316	0.94985	0.9488	680	0	-0.39316
Smarca1	11	0.42445	0.75256	513	5	-0.68457	0.19065	0.19012	125	0	-0.68457
Aanat	7	0.42716	0.69898	514	2	0.052858	0.59873	0.59823	413	0	0.052858
Setd4	11	0.42765	0.75534	515	4	0.057086	0.86884	0.87033	623	0	0.057086
Sfmbt2	9	0.42911	0.73165	516	5	-0.19343	0.8624	0.86126	618	0	-0.19343
Chd3	10	0.43062	0.74724	517	3	0.38352	0.91616	0.91459	652	0	0.38352
Mier3	9	0.43422	0.73604	518	2	0.67872	0.68101	0.6791	477	0	0.67872
Snai1	11	0.43476	0.76146	519	6	-0.16813	0.045828	0.046515	29	1	-0.16813
Prdm6	10	0.43565	0.75078	520	4	-0.17654	0.36157	0.36251	244	0	-0.17654
Kdm3b	11	0.43566	0.76218	521	6	-0.15212	0.18557	0.18475	124	0	-0.15212
Icosl	10	0.43589	0.751	522	5	-0.069921	0.60243	0.60305	415	0	-0.069921
Trim33	10	0.43731	0.75193	523	4	0.68368	0.44311	0.44383	309	0	0.68368
Alg10b	7	0.43945	0.70996	524	4	-0.31728	0.51638	0.51528	354	0	-0.31728
Whsc1l1	6	0.43965	0.68736	525	1	0.20944	0.63221	0.63208	439	0	0.20944
Brwd3	9	0.4443	0.7448	526	4	0.33342	0.23135	0.22933	152	0	0.33342
Cd86	10	0.44459	0.75713	527	5	-0.24838	0.96783	0.96797	697	0	-0.24838
Tdrkh	9	0.44547	0.74582	528	2	0.14431	0.67873	0.67707	476	0	0.14431
Mapk1	9	0.44646	0.74672	529	5	-0.31775	0.93514	0.93378	667	0	-0.31775
Gm11127	8	0.44809	0.73098	530	4	-0.11773	0.34522	0.34488	233	0	-0.11773
Kdm1a	11	0.44945	0.77298	531	4	0.35818	0.10304	0.10343	63	0	0.35818
Ing5	11	0.45034	0.77375	532	4	0.48317	0.66171	0.66166	468	0	0.48317
Cd8a	10	0.45048	0.7611	533	3	0.55822	0.20834	0.20899	136	0	0.55822
Rcor3	5	0.45208	0.68158	534	2	0.038523	0.41216	0.41466	286	0	0.038523
Jade3	6	0.45421	0.69835	535	2	0.6758	0.33224	0.33202	217	0	0.6758
Phf21a	11	0.45441	0.7769	536	5	0.26012	0.21808	0.21715	142	0	0.26012
Dscam	11	0.45551	0.77788	537	6	-0.24618	0.80904	0.80973	568	0	-0.24618
Prmt2	9	0.45655	0.7555	538	3	0.37615	0.11034	0.10954	70	0	0.37615
Naa60	6	0.45791	0.70132	539	3	0.37304	0.5402	0.54132	367	0	0.37304
Vegfb	9	0.45871	0.75721	540	2	0.87602	0.59595	0.59392	411	0	0.87602
Tinagl1	8	0.45999	0.73923	541	4	-0.31728	0.49429	0.49432	344	0	-0.31728
Mmp9	11	0.46153	0.78272	542	6	-0.085983	0.093256	0.093649	60	0	-0.085983
Prdm11	9	0.46159	0.75942	543	5	-0.12003	0.86175	0.86067	617	0	-0.12003
Glyr1	9	0.46296	0.76058	544	5	-0.13221	0.92965	0.92815	663	0	-0.13221
Chd9	8	0.46571	0.74316	545	4	-0.31728	0.61906	0.61942	430	0	-0.31728
Tyw5	6	0.46764	0.70836	546	2	-0.46632	0.77498	0.77396	548	0	-0.46632
Il10	9	0.47167	0.76815	547	3	0.3464	0.38553	0.3829	268	0	0.3464
Cd74	9	0.47426	0.77034	548	5	-0.21302	0.011867	0.012444	8	1	-0.21302
Plk1	2	0.4751	0.52284	549	1	-0.31728	0.057066	0.056896	36	0	-0.31728
Nfs1	7	0.47513	0.74243	550	2	-0.073203	0.0082725	0.0090101	7	1	-0.073203
Brd3	11	0.47648	0.79466	551	3	0.17493	0.75809	0.7594	530	0	0.17493
Zfp541	10	0.47857	0.78079	552	5	-0.31728	0.96099	0.96038	690	0	-0.31728
Sirt5	9	0.47906	0.77371	553	5	-0.33625	0.68147	0.67964	479	0	-0.33625
Smarcc1	10	0.48502	0.78497	554	5	-0.31728	0.15716	0.15833	103	0	-0.31728
Hdgf	10	0.48603	0.78554	555	2	0.23186	0.17141	0.17269	111	0	0.23186
Sirt1	11	0.4865	0.80215	556	5	0.054942	0.97709	0.97761	702	0	0.054942
Hyal1	11	0.48728	0.80279	557	4	0.32091	0.57509	0.57511	391	0	0.32091
Hdac5	11	0.48863	0.80376	558	4	-0.015892	0.73011	0.73094	517	0	-0.015892
Rae1	8	0.49098	0.76087	559	4	-0.26542	0.31776	0.31814	210	0	-0.26542
Ing1	11	0.49161	0.806	560	5	-0.055532	0.87266	0.87372	626	0	-0.055532
Cdyl2	9	0.49176	0.78407	561	5	-0.25098	0.56641	0.56458	387	0	-0.25098
Smc1a	3	0.49707	0.65046	562	2	-0.31728	0.22737	0.22688	150	0	-0.31728
Kdm4a	10	0.50054	0.79511	563	3	0.70734	0.34173	0.3429	227	0	0.70734
Arrb1	11	0.50249	0.8139	564	5	0.80106	0.58692	0.58719	405	0	0.80106
Jak2	10	0.50339	0.79722	565	2	0.6425	0.047108	0.048366	30	1	0.6425
Ash2l	6	0.50507	0.73472	566	2	-0.31728	0.035056	0.03471	22	0	-0.31728
Irf4	10	0.5066	0.79952	567	5	0.048379	0.83903	0.83937	595	0	0.048379
Cbx2	7	0.51416	0.77148	568	2	0.2815	0.8948	0.89546	637	0	0.2815
Prmt7	9	0.51443	0.79791	569	3	0.3151	0.60318	0.60125	416	0	0.3151
Sirt4	11	0.51523	0.82105	570	5	-0.42283	0.11134	0.11147	72	0	-0.42283
Asf1b	10	0.52094	0.80897	571	4	0.17656	0.23177	0.23283	153	0	0.17656
Pick1	9	0.52288	0.80289	572	4	0.0018325	0.38634	0.38375	271	0	0.0018325
Dnajc2	7	0.52315	0.77647	573	2	-0.31728	0.065016	0.064852	43	0	-0.31728
Sat1	10	0.528	0.81376	574	5	-0.0036678	0.6753	0.67584	475	0	-0.0036678
L3mbtl4	5	0.53	0.74074	575	1	0.466	0.14527	0.14369	95	0	0.466
Supt4a	4	0.53117	0.69346	576	2	-0.31728	0.61418	0.61281	428	0	-0.31728
Phrf1	10	0.5332	0.81689	577	4	0.17669	0.11809	0.11872	76	0	0.17669
Kalrn	9	0.53369	0.80916	578	4	-0.12169	0.8195	0.81825	580	0	-0.12169
Trim66	10	0.53932	0.82081	579	4	0.65115	0.64467	0.64552	451	0	0.65115
Eif3b	8	0.54424	0.79827	580	2	0.26615	0.032458	0.031177	20	1	0.26615
Jade1	6	0.54699	0.76508	581	3	-0.15959	0.69891	0.69856	488	0	-0.15959
Lef1	10	0.55303	0.82946	582	4	0.79348	0.3446	0.34562	232	0	0.79348
Dpf3	11	0.55346	0.84184	583	4	0.17992	0.22541	0.22489	148	0	0.17992
Lrp5	9	0.55618	0.8211	584	4	0.18846	0.2041	0.20228	134	0	0.18846
Kir3dl1	9	0.55893	0.82253	585	4	-0.39126	0.13934	0.1377	88	0	-0.39126
Ido1	10	0.56019	0.83438	586	4	-0.047163	0.77293	0.77379	546	0	-0.047163
Cramp1l	10	0.56088	0.83491	587	3	0.41677	0.16787	0.16913	110	0	0.41677
Tnfsf9	11	0.56295	0.84736	588	4	0.50092	0.15184	0.15119	100	0	0.50092
Smarcb1	8	0.56642	0.81328	589	3	0.67367	0.10683	0.10751	66	0	0.67367
Flt4	11	0.5723	0.85208	590	5	-0.21663	0.23629	0.23524	160	0	-0.21663
Aurkc	8	0.57417	0.81851	591	4	0.34088	0.62902	0.62929	436	0	0.34088
Smad3	11	0.5772	0.85478	592	3	0.806	0.083378	0.08402	54	0	0.806
Satl1	11	0.5779	0.85514	593	5	0.066738	0.54302	0.54362	372	0	0.066738
Nat14	11	0.57831	0.85538	594	3	0.58131	0.79893	0.79961	561	0	0.58131
Tada2b	10	0.58051	0.84772	595	5	-0.36259	0.18195	0.18269	121	0	-0.36259
Hmga1-rs1	7	0.58092	0.80806	596	3	0.30928	0.58422	0.58332	401	0	0.30928
Prmt6	11	0.59037	0.86155	597	3	0.33929	0.92079	0.92184	657	0	0.33929
Deaf1	9	0.59124	0.84022	598	4	0.63631	0.57705	0.57511	394	0	0.63631
Icos	8	0.59196	0.83142	599	4	0.23617	0.14161	0.14248	93	0	0.23617
Nat8l	9	0.59225	0.84072	600	4	-0.043436	0.45066	0.44847	312	0	-0.043436
Tnfrsf14	10	0.59321	0.85615	601	3	-0.1063	0.71138	0.71236	503	0	-0.1063
Setd7	10	0.60139	0.8608	602	3	0.04902	0.13415	0.13553	85	0	0.04902
Ctla4	9	0.60524	0.84758	603	4	0.21799	0.7945	0.79401	559	0	0.21799
Gmeb1	10	0.6075	0.86413	604	5	-0.11145	0.65283	0.65351	459	0	-0.11145
Tdrd9	11	0.60767	0.87025	605	5	-0.10833	0.33453	0.33354	220	0	-0.10833
Jak1	11	0.60997	0.87131	606	4	0.49077	0.50877	0.50803	349	0	0.49077
Control	694	0.61584	0.87436	607	334	-0.10057	0.38575	0.38439	269	4	-0.10057
Kdm8	6	0.61664	0.8152	608	3	-0.044152	0.76414	0.76255	536	0	-0.044152
H2-Eb1	10	0.61796	0.87008	609	4	-0.30834	0.75466	0.755	527	0	-0.30834
Rcor1	9	0.62182	0.85609	610	4	-0.42352	0.66139	0.6591	466	0	-0.42352
Arg2	10	0.62236	0.87293	611	5	-0.0095199	0.75935	0.75963	531	0	-0.0095199
Hdac7	11	0.62546	0.87921	612	5	0.27514	0.057528	0.057539	38	0	0.27514
Shprh	10	0.62725	0.87479	613	3	1.0186	0.51224	0.51335	351	0	1.0186
Cecr2	8	0.63085	0.8569	614	3	-0.23491	0.53518	0.53501	364	0	-0.23491
Hdac8	8	0.6309	0.85694	615	4	0.25427	0.5248	0.52445	359	0	0.25427
Kmt2d	6	0.63293	0.82626	616	1	0.09753	0.84541	0.84466	602	0	0.09753
Apc	8	0.64023	0.86186	617	3	-0.57833	0.036788	0.035333	24	1	-0.57833
Mllt3	6	0.64065	0.83158	618	2	1.1671	0.60484	0.60504	417	0	1.1671
Zfp57	10	0.64467	0.88155	619	3	0.51932	0.096675	0.097093	61	0	0.51932
Btla	8	0.65347	0.86744	620	3	-0.27138	0.15807	0.15894	104	0	-0.27138
Ring1	10	0.65924	0.88705	621	3	0.44977	0.56174	0.562	382	0	0.44977
Il6	9	0.66339	0.87794	622	3	0.22653	0.079308	0.078607	50	0	0.22653
Taf5l	11	0.6654	0.89836	623	5	-0.15346	0.71183	0.71262	504	0	-0.15346
Phf11a	6	0.66717	0.84621	624	2	-0.39299	0.83111	0.83052	588	0	-0.39299
Supt6	4	0.66844	0.79848	625	2	-0.31728	0.85077	0.85202	611	0	-0.31728
Kmt2e	6	0.67541	0.8491	626	2	0.094922	0.45799	0.45911	318	0	0.094922
Prpf19	6	0.677	0.84969	627	2	-0.31728	0.013734	0.013651	9	1	-0.31728
Kdm4b	9	0.67827	0.88556	628	2	1.7244	0.17915	0.17771	118	0	1.7244
Mapk3	11	0.68055	0.90576	629	5	-0.21595	0.23869	0.23764	162	0	-0.21595
Vdac1	8	0.68293	0.87907	630	2	0.023747	0.46467	0.4647	321	0	0.023747
Prdm1	11	0.68823	0.90946	631	4	0.18953	0.78982	0.79024	556	0	0.18953
Taf10	9	0.69026	0.89129	632	3	0.23986	0.63613	0.63441	443	0	0.23986
Ctcf	8	0.69035	0.8822	633	2	0.19329	0.84987	0.84986	609	0	0.19329
H2-Bl	6	0.69364	0.85599	634	1	0.49148	0.54238	0.54334	371	0	0.49148
Psmb10	10	0.69926	0.90313	635	4	1.3393	0.30743	0.30914	208	0	1.3393
Pgls	11	0.69944	0.91481	636	3	0.15661	0.17403	0.17297	114	0	0.15661
H2-Q6	10	0.70036	0.90354	637	3	0.30353	0.25564	0.25688	178	0	0.30353
Ube2a	11	0.70963	0.91944	638	5	0.0030182	0.71772	0.71855	510	0	0.0030182
Uhrf2	10	0.71203	0.90829	639	4	0.071468	0.71001	0.71097	501	0	0.071468
Cbx6	10	0.71867	0.91114	640	4	0.20285	0.17611	0.17712	115	0	0.20285
Socs6	10	0.72082	0.91218	641	3	0.50394	0.13047	0.13168	82	0	0.50394
Asxl3	9	0.73005	0.91145	642	3	0.7484	0.48156	0.47924	331	0	0.7484
Mtf2	10	0.7304	0.91588	643	4	-0.072265	0.93151	0.93014	665	0	-0.072265
Phb	5	0.73158	0.84992	644	2	-0.31728	0.79039	0.79112	557	0	-0.31728
Il17a	9	0.74648	0.91981	645	3	0.2268	0.1126	0.11178	73	0	0.2268
Cd27	6	0.74661	0.878	646	2	-0.14562	0.43913	0.43933	304	0	-0.14562
H2-K1	11	0.74698	0.93305	647	2	0.7382	0.08621	0.086662	56	0	0.7382
Pcgf5	7	0.74841	0.89937	648	2	0.41236	0.14063	0.14018	90	0	0.41236
Smyd1	10	0.74949	0.92357	649	3	0.065069	0.65977	0.66031	464	0	0.065069
Baz2b	10	0.75178	0.92454	650	3	0.14773	0.82906	0.82976	586	0	0.14773
Pcgf6	11	0.75448	0.93535	651	4	0.78817	0.32815	0.32769	214	0	0.78817
Rbx1	5	0.75594	0.86553	652	2	-0.31728	0.54913	0.55039	374	0	-0.31728
Stat5a	9	0.75878	0.92373	653	1	1.1878	0.1305	0.12921	83	0	1.1878
Ccl2	10	0.76023	0.92783	654	4	0.30173	0.086437	0.086445	57	0	0.30173
Wrb	7	0.76136	0.90694	655	3	-0.21599	0.23454	0.23335	156	0	-0.21599
Pdcd1	11	0.77327	0.94073	656	3	1.2238	0.041407	0.04228	26	1	1.2238
Smad4	9	0.78089	0.93069	657	2	0.077352	0.2373	0.23513	161	0	0.077352
Phf13	10	0.78446	0.93761	658	3	0.29194	0.77183	0.77264	545	0	0.29194
Vegfc	9	0.79036	0.93328	659	3	1.0767	0.0056367	0.0062888	6	1	1.0767
Prdm2	10	0.79086	0.94019	660	4	0.40357	0.82474	0.82558	583	0	0.40357
Rab33b	10	0.79289	0.94119	661	3	0.28431	0.58759	0.5889	406	0	0.28431
Pmp22	9	0.79358	0.93434	662	2	0.44453	0.19689	0.19535	130	0	0.44453
Taf6l	9	0.79928	0.93616	663	3	0.34817	0.23433	0.23237	155	0	0.34817
Rps7	4	0.80039	0.85401	664	1	-0.31728	0.18173	0.18229	120	0	-0.31728
Nptxr	11	0.80369	0.94992	665	4	0.13816	0.47562	0.47521	327	0	0.13816
Tap1	9	0.80802	0.9387	666	3	0.25515	0.6402	0.63845	446	0	0.25515
Kdm5a	11	0.81459	0.95328	667	4	0.26193	0.48326	0.48267	334	0	0.26193
Suv39h1	9	0.82357	0.94366	668	2	0.2931	0.53687	0.53497	365	0	0.2931
Adora2b	9	0.82388	0.94378	669	3	0.63263	0.62368	0.62174	432	0	0.63263
Stat1	10	0.82441	0.95327	670	3	0.56277	0.66554	0.66574	471	0	0.56277
Flt1	10	0.83023	0.95521	671	3	0.41751	0.40139	0.40331	281	0	0.41751
Hdgfrp2	10	0.83822	0.95701	672	3	0.7992	0.5657	0.56606	386	0	0.7992
Kmt2c	6	0.84076	0.92112	673	1	0.42841	0.51694	0.51778	355	0	0.42841
Ereg	9	0.84397	0.95096	674	3	0.46089	0.73588	0.73461	520	0	0.46089
Adora2a	11	0.84812	0.96411	675	4	0.41654	0.63807	0.63823	445	0	0.41654
Nf1	9	0.85126	0.9535	676	3	0.86158	0.019297	0.019797	13	1	0.86158
Pcgf1	11	0.86037	0.9679	677	3	-0.22852	0.60112	0.6013	414	0	-0.22852
Hif3a	9	0.86448	0.95821	678	3	-0.31206	0.13824	0.13654	86	0	-0.31206
Vegfa	11	0.86466	0.96934	679	4	0.63403	0.13853	0.13769	87	0	0.63403
Dpep1	11	0.86469	0.96935	680	3	0.85342	0.17918	0.1781	119	0	0.85342
Tdrd1	11	0.86671	0.96999	681	4	0.62001	0.27958	0.27924	193	0	0.62001
Piwil2	10	0.86771	0.9644	682	3	0.54344	0.63068	0.63129	437	0	0.54344
Map2k1	9	0.87037	0.96026	683	3	-0.046723	0.3657	0.36325	252	0	-0.046723
Cd276	9	0.87294	0.96113	684	3	0.45471	0.027902	0.02805	17	1	0.45471
2410016O06Rik	8	0.87577	0.95698	685	2	0.2708	0.19203	0.19278	126	0	0.2708
Supt5	4	0.88479	0.896	686	1	-0.24275	0.78142	0.78225	552	0	-0.24275
Trerf1	6	0.8902	0.94805	687	1	0.79348	0.40847	0.4084	284	0	0.79348
Ing3	6	0.89831	0.94985	688	1	0.3124	0.61364	0.61398	427	0	0.3124
Kdm2b	11	0.90082	0.97855	689	3	-0.42988	0.58139	0.58139	399	0	-0.42988
Nfe2l2	9	0.90251	0.97179	690	3	0.75273	0.6502	0.64841	456	0	0.75273
Nf2	11	0.9232	0.98304	691	1	1.9479	6.46e-06	1.48e-05	2	3	1.9479
Rb1	11	0.92465	0.98323	692	3	0.038455	0.12231	0.12204	79	0	0.038455
Lgals9	11	0.93184	0.98487	693	3	0.41938	0.80972	0.81043	569	0	0.41938
Rai1	10	0.9324	0.98225	694	3	0.27769	0.69406	0.69481	486	0	0.27769
Ido2	8	0.9342	0.97321	695	2	0.69468	0.079158	0.079003	49	0	0.69468
Gmeb2	9	0.94183	0.98069	696	2	0.5426	0.21023	0.20848	138	0	0.5426
Tnfrsf9	10	0.94302	0.9858	697	3	0.11939	0.44146	0.44224	306	0	0.11939
Nap1l1	7	0.94465	0.97465	698	1	0.80144	0.29673	0.29679	201	0	0.80144
C920025E04Rik	4	0.94794	0.94739	699	0	0.46398	0.38629	0.38392	270	0	0.46398
Map2k2	10	0.94804	0.98688	700	2	0.71839	0.12058	0.12115	77	0	0.71839
Supt3	4	0.95091	0.9505	701	0	-0.035735	0.70755	0.70607	496	0	-0.035735
Hmga1	6	0.95181	0.96537	702	1	0.26655	0.61212	0.61236	424	0	0.26655
Slc25a15	10	0.96108	0.98888	703	2	0.64136	0.73126	0.73168	518	0	0.64136
Ltbr	10	0.96137	0.98893	704	2	0.51585	0.14754	0.149	98	0	0.51585
Ado	10	0.96459	0.98945	705	2	0.95505	0.082571	0.082714	53	0	0.95505
Arnt	10	0.96732	0.99002	706	2	0.21392	0.43481	0.43629	299	0	0.21392
Ruvbl2	7	0.96874	0.98056	707	1	-0.065164	0.56737	0.56691	388	0	-0.065164
Trim28	9	0.9714	0.98945	708	2	0.6341	0.17387	0.17264	113	0	0.6341
Tsc1	10	0.97315	0.99134	709	1	0.62211	0.026877	0.028139	16	1	0.62211
Tsc2	9	0.97406	0.99039	710	1	0.42707	0.2664	0.26406	185	0	0.42707
Cbx3	4	0.97501	0.97459	711	0	0.47942	0.44554	0.44369	311	0	0.47942
Snd1	11	0.97522	0.9941	712	2	1.3793	0.33028	0.32953	216	0	1.3793
Pten	11	0.97603	0.99418	713	2	1.0399	0.0053587	0.0066945	5	1	1.0399
B2m	10	0.983	0.99424	714	1	1.9557	0.26415	0.26542	181	0	1.9557
Setd5	11	0.98396	0.99552	715	2	0.88877	0.11684	0.11674	75	0	0.88877
Fbxw7	11	0.98563	0.99586	716	1	1.5562	6.75e-07	4.95e-06	1	3	1.5562
Tada1	10	0.98789	0.99588	717	2	0.37195	0.056419	0.05748	35	0	0.37195
Relb	11	0.98974	0.99691	718	2	0.3554	0.14521	0.14459	94	0	0.3554
Kat7	5	0.98978	0.98952	719	0	0.91423	0.42123	0.42324	291	0	0.91423
Hif1a	11	0.99118	0.99734	720	2	1.0416	0.039929	0.040855	25	1	1.0416
Mbd3	10	0.9971	0.99786	721	1	0.46635	0.63802	0.63873	444	0	0.46635
Sirt6	9	0.99887	0.99889	722	0	1.4986	0.39443	0.39168	275	0	1.4986
Usp22	10	0.99892	0.99889	723	1	0.56448	0.17259	0.17394	112	0	0.56448
Tdrd5	9	0.99925	0.99928	724	0	0.53659	0.21226	0.21062	139	0	0.53659
Tapbp	11	0.99954	0.99958	725	0	0.49759	0.23989	0.23898	165	0	0.49759
Tap2	10	1	1	726	0	2.4881	0.11684	0.11756	74	0	2.4881
Trp53	10	1	1	727	0	1.8015	0.051108	0.052096	33	1	1.8015

## Sheet: ID-IgG VS ID-PD1
id	num	neg|score	neg|p-value	neg|rank	neg|goodsgrna	neg|lfc	pos|score	pos|p-value	pos|rank	pos|goodsgrna	pos|lfc
H2-DMa	6	0.00011687	0.00067786	1	6	-0.95608	0.99866	0.99854	725	0	-0.95608
Aurka	7	0.00029959	0.0017664	2	4	-0.53016	0.61453	0.61459	438	0	-0.53016
Prdm5	9	0.000347	0.0027461	3	5	-0.1655	0.62641	0.62532	451	0	-0.1655
Vhl	9	0.00042759	0.0032013	4	6	-0.53016	0.7672	0.76559	554	0	-0.53016
Clock	9	0.000602	0.0043492	5	5	-0.35065	0.19157	0.18996	140	0	-0.35065
Eed	10	0.00064394	0.00522	6	6	-0.079412	0.9625	0.96316	693	0	-0.079412
Satb1	10	0.00066575	0.0054278	7	7	-0.60567	0.82639	0.82817	600	0	-0.60567
Hells	10	0.00076731	0.00617	8	8	-0.53016	0.53089	0.53273	383	0	-0.53016
Ccnt1	11	0.0010547	0.0078325	9	8	-0.55675	0.9556	0.95562	689	0	-0.55675
Dnmt1	8	0.0010814	0.0065263	10	7	-0.57878	0.99421	0.99389	720	0	-0.57878
Ccnt2	11	0.0011124	0.0081789	11	7	-0.25718	0.72797	0.72755	527	0	-0.25718
Ep400	10	0.0015122	0.010683	12	8	-0.86467	0.5149	0.51691	370	0	-0.86467
Mfge8	11	0.0015853	0.011276	13	9	-0.46449	0.3937	0.39261	290	0	-0.46449
Kat8	6	0.0016881	0.0084263	14	4	-0.53016	0.67711	0.67801	485	0	-0.53016
Sp110	8	0.0017927	0.010762	15	6	-0.53487	0.90726	0.90754	655	0	-0.53487
Rnf40	9	0.0018261	0.012385	16	3	0.54875	0.26042	0.25802	190	0	0.54875
Dot1l	11	0.001982	0.013889	17	9	-0.72208	0.25436	0.25371	181	0	-0.72208
Hat1	9	0.0022007	0.014502	18	6	-0.52321	0.97968	0.97927	704	0	-0.52321
Smc3	8	0.0026527	0.015512	19	5	-0.53016	0.70428	0.70447	505	0	-0.53016
Hr	10	0.0027054	0.017728	20	6	-0.16081	0.14109	0.14178	106	0	-0.16081
Epc1	9	0.0028084	0.017709	21	5	-0.2447	0.7577	0.75596	548	0	-0.2447
Bahd1	11	0.0034543	0.023052	22	8	-1.0883	0.98602	0.98631	715	0	-1.0883
Tcf20	11	0.0037165	0.024339	23	7	-0.20153	0.083744	0.084337	64	0	-0.20153
2610002M06Rik	8	0.0037239	0.020925	24	8	-0.41004	0.99628	0.99594	722	0	-0.41004
Aurkb	7	0.0040264	0.021281	25	5	-0.60024	0.92215	0.92186	664	0	-0.60024
Prr14	10	0.004728	0.029386	26	6	-0.36101	0.75165	0.75317	544	0	-0.36101
Zmynd8	11	0.0055433	0.034521	27	4	0.65073	0.26793	0.26736	198	0	0.65073
Brd4	8	0.0059409	0.031127	28	4	-0.24186	0.6898	0.6896	497	0	-0.24186
Gsg2	8	0.0061081	0.03177	29	4	-0.40506	0.47982	0.47993	343	0	-0.40506
Mbd1	10	0.0061766	0.037223	30	9	-0.74778	0.99881	0.99889	726	0	-0.74778
Tet1	11	0.0063273	0.038618	31	6	-0.64791	0.73651	0.73599	535	0	-0.64791
Prdm12	7	0.006548	0.033374	32	6	-0.49955	0.30801	0.30819	222	0	-0.49955
Hdgfl1	10	0.0067052	0.039934	33	7	-0.73124	0.25002	0.25157	176	0	-0.73124
Phc2	6	0.0069015	0.032087	34	5	-0.59595	0.8596	0.85974	628	0	-0.59595
Bahcc1	11	0.0070615	0.042181	35	9	-0.60182	0.99893	0.99895	727	0	-0.60182
Kdm3a	10	0.0071304	0.041874	36	8	-0.53016	0.49987	0.50185	360	0	-0.53016
Ing2	10	0.0074554	0.043636	37	6	-0.39997	0.65591	0.65752	469	0	-0.39997
Morf4l1	8	0.0081333	0.040459	38	5	-0.53016	0.33518	0.33515	240	0	-0.53016
Ncor1	9	0.0083079	0.044239	39	3	0.68133	0.5496	0.54796	398	0	0.68133
Tgfb3	10	0.0086199	0.049474	40	4	0.080998	0.64327	0.64529	463	0	0.080998
Chd1	9	0.0087094	0.046139	41	7	-0.65199	0.98354	0.98289	711	0	-0.65199
Tdo2	10	0.0088182	0.050434	42	7	-0.66199	0.48516	0.4876	350	0	-0.66199
Phf11a	6	0.0096001	0.043012	43	6	-0.84249	0.9904	0.9905	719	0	-0.84249
Mina	11	0.0096367	0.053987	44	5	0.14808	0.49071	0.48972	355	0	0.14808
Phf20	8	0.0096456	0.046733	45	6	-0.53016	0.71383	0.71386	511	0	-0.53016
Msl3	6	0.010207	0.045516	46	4	-0.64057	0.15784	0.15638	118	0	-0.64057
Kdm4d	10	0.01032	0.057836	47	6	-0.23557	0.53566	0.53724	388	0	-0.23557
Elp3	8	0.010575	0.050731	48	2	0.10398	0.85506	0.8548	624	0	0.10398
Psmb8	10	0.010582	0.059068	49	8	-0.83901	0.7454	0.74676	541	0	-0.83901
Eif6	9	0.010651	0.054768	50	4	-0.028047	0.72784	0.72563	526	0	-0.028047
Mr1	10	0.01071	0.059538	51	8	-0.72411	0.88496	0.8856	641	0	-0.72411
Mta3	9	0.010745	0.055273	52	8	-0.74752	0.9761	0.97593	701	0	-0.74752
Alkbh1	11	0.011112	0.060617	53	6	-0.0024501	0.87299	0.87382	633	0	-0.0024501
Sin3a	10	0.011447	0.062645	54	5	-0.23435	0.97618	0.97672	702	0	-0.23435
Chmp1b	6	0.01172	0.051305	55	3	-0.089559	0.80264	0.80294	583	0	-0.089559
Ube2i	8	0.011997	0.056411	56	6	-0.49963	0.5228	0.52263	377	0	-0.49963
Hdac10	11	0.012445	0.066524	57	5	0.15882	0.078228	0.078498	57	0	0.15882
Setd1a	9	0.012504	0.06314	58	6	-0.44851	0.25152	0.24878	177	0	-0.44851
Hdgfrp3	10	0.012595	0.067326	59	6	-0.24264	0.63021	0.63188	457	0	-0.24264
Chrac1	9	0.01272	0.06408	60	3	0.39166	0.84625	0.84499	617	0	0.39166
Dnajc2	9	0.012738	0.06411	61	3	0.10398	0.013924	0.014067	10	0	0.10398
Mecp2	11	0.013015	0.069167	62	6	-0.63674	0.16423	0.1644	124	0	-0.63674
Rnf17	11	0.013288	0.070404	63	5	0.88138	0.39086	0.38964	288	0	0.88138
Mysm1	8	0.01338	0.061854	64	6	-0.53016	0.40522	0.40525	295	0	-0.53016
Gm7030	9	0.014209	0.07075	65	8	-0.73004	0.98079	0.98035	706	0	-0.73004
Epc2	8	0.014425	0.066069	66	6	-0.96043	0.83065	0.82954	602	0	-0.96043
Taf6l	9	0.014444	0.071561	67	8	-0.20428	0.88651	0.88535	642	0	-0.20428
Msh6	10	0.014525	0.074847	68	8	-0.62926	0.2521	0.25366	180	0	-0.62926
Tada3	11	0.01478	0.076826	69	9	-0.29647	0.87138	0.87201	632	0	-0.29647
Dmtf1	10	0.015026	0.077004	70	7	-0.45001	0.4427	0.44464	322	0	-0.45001
Dpf3	11	0.015209	0.078686	71	7	-0.042952	0.12943	0.12936	96	0	-0.042952
Chd2	11	0.015267	0.078835	72	5	0.16559	0.49872	0.49806	358	0	0.16559
Dpf2	9	0.015486	0.076044	73	6	-0.56157	0.93812	0.93769	675	0	-0.56157
Dicer1	10	0.015605	0.079201	74	7	-0.99727	0.76886	0.7706	557	0	-0.99727
Npcd	6	0.015886	0.067722	75	5	-0.50116	0.98125	0.98079	707	0	-0.50116
Csf3	9	0.016328	0.079617	76	5	-0.36831	0.6892	0.6873	494	0	-0.36831
Cbx5	8	0.016533	0.073907	77	7	-0.19734	0.91839	0.91885	660	0	-0.19734
Zcwpw1	11	0.01662	0.08501	78	8	-0.49802	0.2394	0.23868	170	0	-0.49802
Nat10	9	0.016978	0.082298	79	6	-0.24659	0.7662	0.76467	552	0	-0.24659
Brd3	11	0.016992	0.086583	80	6	-0.21873	0.97344	0.97371	699	0	-0.21873
Ep300	11	0.01784	0.089879	81	9	-0.68868	0.8466	0.84698	618	0	-0.68868
Mgea5	9	0.017988	0.086494	82	3	0.26708	0.47782	0.47567	342	0	0.26708
Prmt1	7	0.01807	0.07644	83	4	-0.094122	0.8402	0.83991	613	0	-0.094122
Setd8	9	0.0182	0.087464	84	5	-0.53016	0.35435	0.35242	257	0	-0.53016
Kdm4c	11	0.018457	0.09263	85	7	-0.25213	0.42506	0.42445	306	0	-0.25213
Chmp4b	10	0.018643	0.091215	86	8	-0.53016	0.96361	0.96438	694	0	-0.53016
Map3k12	11	0.018775	0.094124	87	8	-0.31315	0.85734	0.85788	625	0	-0.31315
Gtf3c4	8	0.018796	0.082259	88	5	-0.53016	0.95838	0.95867	691	0	-0.53016
Smc2	6	0.018936	0.076341	89	3	-0.53016	0.58043	0.58162	418	0	-0.53016
Nat14	11	0.019453	0.097182	90	6	-0.035702	0.28787	0.28699	208	0	-0.035702
Chd8	11	0.019641	0.097993	91	9	-0.41369	0.52281	0.52168	378	0	-0.41369
Smarcad1	9	0.019924	0.094441	92	4	-0.16984	0.51489	0.51236	369	0	-0.16984
Atrx	8	0.020461	0.088919	93	5	-0.53016	0.34646	0.34632	249	0	-0.53016
Sat1	10	0.020462	0.098201	94	7	-0.92749	0.37619	0.37787	273	0	-0.92749
Tdrd7	10	0.020755	0.09927	95	7	-0.4672	0.26452	0.26609	197	0	-0.4672
Nap1l2	10	0.020786	0.099388	96	8	-0.46984	0.98979	0.98988	718	0	-0.46984
Thbs1	9	0.022067	0.10156	97	6	-0.22176	0.43679	0.43419	317	0	-0.22176
Kras	6	0.022128	0.085871	98	4	-0.58623	0.82955	0.82944	601	0	-0.58623
Ciita	9	0.022158	0.10195	99	7	-0.53016	0.15348	0.15156	115	0	-0.53016
Dxo	6	0.022178	0.086059	100	4	-0.25234	0.33322	0.33275	238	0	-0.25234
Pygo1	10	0.022854	0.10713	101	4	0.43497	0.19388	0.19481	141	0	0.43497
Phf6	9	0.023024	0.10472	102	5	-0.50215	0.28971	0.28795	210	0	-0.50215
Asxl3	9	0.023509	0.10643	103	7	-0.27922	0.62539	0.62421	447	0	-0.27922
Setd6	11	0.023612	0.1144	104	8	-0.75281	0.90852	0.90971	657	0	-0.75281
Setmar	10	0.023876	0.11103	105	6	-0.51792	0.16441	0.16545	125	0	-0.51792
Asz1	8	0.024109	0.10208	106	4	0.013328	0.72347	0.72329	522	0	0.013328
Prdm2	10	0.02432	0.11248	107	3	0.54057	0.1099	0.11039	79	0	0.54057
Entpd1	10	0.024567	0.11337	108	7	-0.28702	0.60923	0.61061	436	0	-0.28702
Phf11d	5	0.025126	0.090947	109	3	-0.2884	0.68971	0.69025	496	0	-0.2884
Pwwp2a	8	0.025218	0.1058	110	7	-0.40403	0.91343	0.91353	658	0	-0.40403
Snapc4	10	0.025815	0.11799	111	5	-0.53016	0.91713	0.91722	659	0	-0.53016
Sirt2	11	0.026016	0.12343	112	8	-0.50564	0.99574	0.99567	721	0	-0.50564
Jmjd8	9	0.0265	0.11594	113	6	-0.19515	0.9205	0.9203	663	0	-0.19515
Rai1	10	0.027301	0.12302	114	8	-0.78311	0.84426	0.84519	615	0	-0.78311
Chd6	10	0.027407	0.12345	115	4	0.16804	0.42567	0.42819	307	0	0.16804
Prmt10	10	0.028341	0.12695	116	8	-0.55066	0.88262	0.88329	639	0	-0.55066
Fto	10	0.028773	0.12833	117	7	-0.092188	0.51701	0.51921	373	0	-0.092188
Gm6251	6	0.030159	0.10944	118	5	-0.65651	0.66259	0.66364	477	0	-0.65651
Slc38a1	9	0.030936	0.13005	119	6	-0.68296	0.78179	0.78019	563	0	-0.68296
Smchd1	8	0.031505	0.12795	120	3	0.41661	0.74223	0.74173	540	0	0.41661
Lrp6	11	0.031554	0.1448	121	7	-0.51849	0.98611	0.98643	716	0	-0.51849
Cbx1	9	0.031827	0.13258	122	3	0.11218	0.46956	0.46755	337	0	0.11218
Mier1	9	0.031972	0.13293	123	6	-0.63491	0.96668	0.96673	695	0	-0.63491
Uhrf2	11	0.032431	0.14811	124	6	-0.040283	0.17304	0.1729	128	0	-0.040283
Psma3	4	0.032888	0.099923	125	2	-0.53016	0.25993	0.25862	188	0	-0.53016
Polr2d	7	0.033159	0.12686	126	2	0.22822	0.44016	0.43927	320	0	0.22822
Rbm14	11	0.033252	0.15042	127	8	-0.37579	0.78615	0.78629	568	0	-0.37579
Cbx6	10	0.033644	0.14481	128	8	-0.21583	0.19722	0.19821	143	0	-0.21583
Ubr7	10	0.033788	0.14535	129	8	-0.83279	0.93737	0.93773	673	0	-0.83279
Piwil2	10	0.034101	0.14633	130	8	-0.28248	0.99699	0.99701	724	0	-0.28248
Phc3	9	0.034333	0.14026	131	7	-0.55577	0.96683	0.96692	696	0	-0.55577
Ezh1	11	0.035884	0.15814	132	8	-0.91551	0.94119	0.94198	681	0	-0.91551
Gars	10	0.036436	0.15428	133	4	0.19191	0.38586	0.38772	281	0	0.19191
Rbbp7	10	0.03672	0.15532	134	6	-0.53016	0.12081	0.12083	91	0	-0.53016
Dimt1	8	0.036797	0.14585	135	5	-0.53016	0.66277	0.6634	478	0	-0.53016
Pgls	11	0.036965	0.16153	136	8	-0.35683	0.9842	0.98463	712	0	-0.35683
Snd1	11	0.038301	0.16566	137	4	0.14885	0.66797	0.66631	479	0	0.14885
Kir3dl2	8	0.03839	0.15027	138	3	0.1348	0.33062	0.33068	236	0	0.1348
Dmap1	9	0.038496	0.15281	139	4	-0.31257	0.96741	0.9676	697	0	-0.31257
Smn1	10	0.038618	0.16146	140	5	-0.06001	0.62576	0.62713	449	0	-0.06001
Mphosph8	6	0.039183	0.13376	141	4	-0.53016	0.63422	0.63532	459	0	-0.53016
Chaf1a	6	0.039486	0.13449	142	3	-0.27454	0.85738	0.85742	626	0	-0.27454
Brwd3	9	0.039575	0.15592	143	7	-0.15604	0.56669	0.56507	411	0	-0.15604
Ube2e1	10	0.039995	0.16622	144	7	-0.199	0.99672	0.99678	723	0	-0.199
Hltf	10	0.041931	0.17284	145	4	0.78282	0.11355	0.11401	83	0	0.78282
Brd2	5	0.042248	0.13738	146	2	0.13573	0.48156	0.482	345	0	0.13573
Smad4	9	0.043528	0.16798	147	7	-0.61259	0.77798	0.77623	560	0	-0.61259
Adora2a	11	0.043686	0.18167	148	8	-0.44144	0.87092	0.87154	631	0	-0.44144
Asxl2	6	0.044411	0.14769	149	3	0.3838	0.097703	0.09734	70	0	0.3838
Phf1	10	0.044443	0.18131	150	6	-0.41665	0.60456	0.60644	434	0	-0.41665
Kat5	9	0.044807	0.1717	151	6	-0.1779	0.11051	0.11026	80	0	-0.1779
L3mbtl2	10	0.045954	0.18637	152	7	-0.22216	0.22778	0.22938	164	0	-0.22216
Bptf	7	0.046066	0.16616	153	3	-0.465	0.090562	0.090443	66	0	-0.465
Cd86	10	0.046673	0.18862	154	6	-0.39629	0.90256	0.903	650	0	-0.39629
Ido2	8	0.047189	0.17366	155	3	0.61909	0.42952	0.4297	310	0	0.61909
Brwd1	9	0.047431	0.17955	156	6	-0.69772	0.98233	0.98182	709	0	-0.69772
Tnfsf4	11	0.048769	0.19644	157	5	0.17181	0.19776	0.19771	144	0	0.17181
Phf21b	10	0.04978	0.19853	158	5	0.025537	0.48367	0.48598	348	0	0.025537
Glt28d2	9	0.04984	0.18691	159	4	0.46504	0.46538	0.4633	333	0	0.46504
Ash1l	10	0.050956	0.20233	160	2	0.3341	0.48292	0.48518	347	0	0.3341
Trim28	9	0.051189	0.19075	161	7	-0.61032	0.88756	0.88648	644	0	-0.61032
Myb	10	0.051236	0.2031	162	5	0.012485	0.63733	0.63876	461	0	0.012485
Il4	8	0.051824	0.18585	163	6	-0.53016	0.79146	0.7911	573	0	-0.53016
Smarcb1	9	0.052241	0.19374	164	6	-0.56369	0.7369	0.73525	536	0	-0.56369
Ctcf	9	0.053238	0.19642	165	5	-0.19798	0.75457	0.7528	545	0	-0.19798
Arnt2	6	0.054032	0.17212	166	4	-0.45654	0.027697	0.027169	20	0	-0.45654
Baz2a	10	0.054781	0.215	167	6	-0.079131	0.75663	0.75804	547	0	-0.079131
Kdm1b	11	0.055012	0.21447	168	6	-0.25174	0.10685	0.10751	77	0	-0.25174
Pbrm1	9	0.055933	0.20414	169	4	0.064533	0.5508	0.5492	400	0	0.064533
Sirt3	11	0.056048	0.21747	170	8	-0.85677	0.67767	0.67573	486	0	-0.85677
Hdgfrp2	10	0.056067	0.21836	171	5	-0.11071	0.57918	0.5809	416	0	-0.11071
Kdm4a	10	0.056083	0.21837	172	7	-0.21085	0.55953	0.56122	407	0	-0.21085
Mllt10	9	0.056406	0.20536	173	4	0.067161	0.16911	0.16729	126	0	0.067161
Phf13	11	0.057272	0.22096	174	6	0.063497	0.98533	0.98569	714	0	0.063497
Ptprc	6	0.058285	0.18197	175	5	-0.30057	0.64446	0.64563	464	0	-0.30057
Brdt	11	0.058682	0.22511	176	6	0.030816	0.78283	0.7829	564	0	0.030816
Phc1	9	0.059715	0.2144	177	6	-0.28334	0.41975	0.41745	304	0	-0.28334
Nap1l3	10	0.059718	0.22742	178	7	-0.39858	0.32859	0.33015	233	0	-0.39858
Nfkb1	11	0.059737	0.22787	179	7	-0.41557	0.43222	0.43151	311	0	-0.41557
Rpl32	4	0.06056	0.17041	180	4	-0.53016	0.93944	0.93882	678	0	-0.53016
Alg10b	8	0.060601	0.20864	181	2	0.39607	0.51882	0.51896	375	0	0.39607
Taf9	4	0.060622	0.17049	182	2	-0.53016	0.50103	0.50032	362	0	-0.53016
Hemk1	10	0.06114	0.2306	183	6	-0.31397	0.14227	0.14284	108	0	-0.31397
Cecr2	10	0.061195	0.23076	184	4	0.21818	0.59566	0.59779	428	0	0.21818
Kdm6a	10	0.06189	0.23251	185	7	-0.35278	0.78837	0.79008	571	0	-0.35278
Meaf6	7	0.062237	0.21077	186	3	-0.25549	0.61787	0.61796	441	0	-0.25549
Tada2a	9	0.063595	0.22509	187	5	-0.07063	0.60239	0.60093	431	0	-0.07063
Jmjd1c	11	0.064205	0.23998	188	7	-0.26418	0.98626	0.98655	717	0	-0.26418
Ncor2	10	0.065402	0.24079	189	6	-0.09965	0.55888	0.56032	406	0	-0.09965
Ube2v1	9	0.066768	0.23362	190	3	0.21526	0.98068	0.98022	705	0	0.21526
Smyd4	10	0.06757	0.24625	191	4	0.59947	0.058634	0.059528	39	0	0.59947
Lgals9	11	0.067893	0.25001	192	7	-0.55062	0.75619	0.75624	546	0	-0.55062
H2-K1	11	0.068009	0.25032	193	5	0.29368	0.89557	0.89637	649	0	0.29368
Ccl12	7	0.068422	0.22365	194	4	-0.11055	0.18956	0.1884	139	0	-0.11055
Setd3	9	0.068788	0.23898	195	6	-0.047042	0.39057	0.38793	287	0	-0.047042
Tinagl1	8	0.069251	0.22979	196	6	-0.29345	0.97595	0.97572	700	0	-0.29345
Tdrkh	10	0.069911	0.25184	197	5	0.29866	0.92038	0.92071	662	0	0.29866
Vtcn1	10	0.069949	0.25195	198	7	-0.66691	0.18266	0.18336	132	0	-0.66691
Prdm8	11	0.070698	0.25746	199	6	-0.19072	0.035884	0.036402	24	0	-0.19072
Npm1	7	0.071907	0.23118	200	4	-0.53016	0.80147	0.80152	581	0	-0.53016
Jarid2	11	0.072073	0.26129	201	6	-0.053805	0.062902	0.062903	43	0	-0.053805
Suz12	11	0.07257	0.26268	202	5	0.10438	0.73295	0.73235	530	0	0.10438
Sp140	8	0.07306	0.23885	203	3	0.61133	0.70203	0.70213	504	0	0.61133
Orc1	11	0.074151	0.2672	204	6	-0.17029	0.92855	0.92973	669	0	-0.17029
Cd4	10	0.074377	0.2623	205	7	-0.27851	0.619	0.6204	442	0	-0.27851
Smyd2	10	0.075071	0.26391	206	6	-0.78227	0.40564	0.40781	296	0	-0.78227
Hspbap1	9	0.075102	0.25552	207	7	-0.56201	0.97042	0.97051	698	0	-0.56201
Mecom	8	0.075794	0.24528	208	5	-0.34916	0.51653	0.51656	372	0	-0.34916
Kat2b	11	0.075953	0.27207	209	4	0.36147	0.11622	0.11665	86	0	0.36147
Ezh2	11	0.076438	0.27337	210	5	0.25422	0.70082	0.69978	503	0	0.25422
Brd8	9	0.07703	0.26047	211	2	0.54494	0.25762	0.25502	186	0	0.54494
Tap1	9	0.077346	0.26127	212	7	-0.28637	0.83383	0.83232	605	0	-0.28637
Terf2	10	0.077689	0.27	213	5	-0.44693	0.5723	0.57438	413	0	-0.44693
Dnmt3a	11	0.080398	0.28367	214	8	-0.2278	0.018457	0.01854	13	0	-0.2278
Mllt6	10	0.080855	0.27754	215	7	-0.42136	0.098865	0.099161	72	0	-0.42136
Mllt1	10	0.080998	0.27785	216	6	-0.71661	0.87842	0.879	636	0	-0.71661
Fxyd1	10	0.081218	0.27844	217	5	-0.21752	0.24583	0.24737	174	0	-0.21752
Cbx4	10	0.081613	0.27925	218	7	-0.21568	0.18378	0.18447	134	0	-0.21568
Prkaa2	10	0.081791	0.27962	219	4	0.41123	0.53226	0.53391	386	0	0.41123
Scml2	8	0.081919	0.25964	220	4	-0.18535	0.24118	0.24195	172	0	-0.18535
Tgfb1	11	0.082155	0.28842	221	5	0.089258	0.69022	0.68855	498	0	0.089258
Cxxc1	9	0.082299	0.2741	222	4	-0.10137	0.82498	0.82325	598	0	-0.10137
Nat6	10	0.082524	0.28133	223	6	-0.22193	0.68672	0.68791	491	0	-0.22193
Phf11b	5	0.083403	0.22355	224	3	-0.447	0.79651	0.79749	578	0	-0.447
Tnfsf9	11	0.084578	0.29481	225	7	-0.33986	0.67069	0.66878	482	0	-0.33986
H2-Q4	10	0.086319	0.29026	226	7	-0.29159	0.66055	0.66204	474	0	-0.29159
Mis18bp1	7	0.086549	0.26025	227	3	-0.53016	0.78516	0.78541	565	0	-0.53016
Ing5	11	0.087017	0.30084	228	6	-0.25287	0.88889	0.88951	645	0	-0.25287
Mier3	9	0.088314	0.28924	229	4	0.1952	0.080428	0.079933	60	0	0.1952
Smad1	11	0.08923	0.30613	230	2	0.24677	0.53036	0.52971	382	0	0.24677
L3mbtl1	10	0.089606	0.29751	231	6	-0.49538	0.20386	0.20484	150	0	-0.49538
Mbd6	10	0.090746	0.30003	232	5	-0.53016	0.044436	0.045684	30	0	-0.53016
Ing4	8	0.090924	0.28029	233	1	0.40014	0.48831	0.48849	353	0	0.40014
Eng	10	0.091165	0.30107	234	7	-0.64607	0.72366	0.72457	523	0	-0.64607
H2-Ab1	10	0.091507	0.30182	235	5	0.28585	0.51135	0.51341	368	0	0.28585
Ctnnb1	8	0.091847	0.28247	236	5	-0.14228	0.9575	0.95777	690	0	-0.14228
Angpt2	10	0.092249	0.30334	237	6	-0.53627	0.58413	0.58608	421	0	-0.53627
Huwe1	5	0.092803	0.24202	238	2	-0.53016	0.29177	0.29207	213	0	-0.53016
Nat9	9	0.092817	0.29876	239	6	-0.34245	0.78984	0.78854	572	0	-0.34245
Mum1	10	0.093576	0.30606	240	5	0.17029	0.94274	0.94331	683	0	0.17029
Prmt6	11	0.093584	0.31688	241	6	-0.25735	0.93794	0.93887	674	0	-0.25735
Hdac2	9	0.0943	0.30191	242	4	0.15917	0.41749	0.415	302	0	0.15917
Hif1a	11	0.094903	0.32009	243	8	-0.55147	0.93107	0.93208	670	0	-0.55147
Caprin2	10	0.09573	0.31091	244	5	-0.0005352	0.98277	0.9834	710	0	-0.0005352
Phf10	10	0.096575	0.31292	245	7	-0.53965	0.8921	0.89266	648	0	-0.53965
Csf2	10	0.096956	0.31365	246	6	-0.43777	0.41907	0.42162	303	0	-0.43777
Stat4	9	0.097252	0.30747	247	3	0.1832	0.13866	0.13707	104	0	0.1832
Setd5	11	0.097403	0.32618	248	5	0.33491	0.5011	0.50032	363	0	0.33491
Chmp4c	11	0.097742	0.32706	249	6	-0.068086	0.73115	0.73062	529	0	-0.068086
Cdk9	7	0.09793	0.28258	250	4	-0.48132	0.94887	0.94924	686	0	-0.48132
Bmi1	9	0.098364	0.30983	251	4	0.17085	0.69135	0.6894	499	0	0.17085
Suv39h1	9	0.098405	0.30988	252	6	-0.18773	0.016328	0.016452	12	0	-0.18773
Relb	11	0.098759	0.32941	253	6	-0.070183	0.024298	0.024744	17	0	-0.070183
Taf8	8	0.09985	0.30045	254	2	0.26865	0.47675	0.4769	339	0	0.26865
Brd7	8	0.10019	0.30115	255	3	0.53926	0.6337	0.63347	458	0	0.53926
Prdm1	11	0.10056	0.33395	256	8	-0.13904	0.16043	0.16084	121	0	-0.13904
Sf3b3	7	0.10084	0.28792	257	4	-0.24187	0.98144	0.98165	708	0	-0.24187
Arid4a	11	0.10146	0.33611	258	4	0.045955	0.70428	0.70321	506	0	0.045955
Taf3	9	0.10205	0.31697	259	6	-0.31936	0.67423	0.67225	483	0	-0.31936
Prdm6	10	0.10303	0.32723	260	5	-0.28912	0.17926	0.18004	130	0	-0.28912
4632428N05Rik	11	0.10351	0.34101	261	7	-0.21213	0.44194	0.44117	321	0	-0.21213
Zmynd11	10	0.10363	0.3286	262	7	-0.41487	0.79562	0.79742	576	0	-0.41487
Dpep2	10	0.10387	0.32919	263	5	-0.040447	0.22671	0.22812	163	0	-0.040447
Trdmt1	11	0.10416	0.34254	264	5	0.30285	0.56439	0.56446	410	0	0.30285
Rbbp4	9	0.1044	0.32099	265	5	-0.16398	0.38427	0.38156	279	0	-0.16398
Rps6ka5	9	0.10611	0.32397	266	4	-0.14447	0.80257	0.80139	582	0	-0.14447
Kdm6b	11	0.10632	0.34753	267	6	-0.10862	0.8748	0.87581	634	0	-0.10862
Men1	9	0.10679	0.32545	268	3	0.20199	0.5065	0.50421	366	0	0.20199
Chmp2a	7	0.10789	0.30122	269	3	-0.19199	0.062237	0.062309	42	0	-0.19199
Phf12	9	0.10835	0.32832	270	5	-0.13946	0.8358	0.83434	609	0	-0.13946
Adora1	11	0.10956	0.3547	271	5	0.36913	0.76591	0.76552	551	0	0.36913
Hdac5	11	0.11	0.35591	272	8	-0.37312	0.28348	0.28276	204	0	-0.37312
Mgmt	11	0.11168	0.35993	273	5	0.16397	0.89208	0.89294	647	0	0.16397
Cdc5l	7	0.11188	0.30894	274	3	-0.53016	0.11645	0.11547	87	0	-0.53016
Il12a	7	0.11331	0.31168	275	3	0.072998	0.90798	0.90789	656	0	0.072998
Arid4b	10	0.11355	0.34974	276	4	0.66819	0.45771	0.45954	327	0	0.66819
Smyd3	11	0.11552	0.36787	277	6	-0.16894	0.069897	0.069424	51	0	-0.16894
Il13	10	0.11705	0.35677	278	6	-0.013572	0.3753	0.3768	272	0	-0.013572
Cd276	9	0.11972	0.34893	279	6	-0.039108	0.02112	0.021202	15	0	-0.039108
Nos2	11	0.1201	0.37579	280	7	-0.63941	0.38034	0.37946	276	0	-0.63941
Rnf2	10	0.12107	0.3655	281	7	-0.53016	0.78601	0.7876	567	0	-0.53016
Smarca1	11	0.12408	0.38276	282	5	0.1784	0.54658	0.54665	394	0	0.1784
Apc	8	0.12488	0.35266	283	6	-0.24911	0.72383	0.72366	524	0	-0.24911
Pax5	10	0.12499	0.37325	284	7	-0.50963	0.56404	0.56564	409	0	-0.50963
Pygo2	10	0.12642	0.37591	285	5	0.1096	0.58351	0.58551	420	0	0.1096
Ncoa3	9	0.1282	0.36512	286	6	-0.43398	0.64284	0.64184	462	0	-0.43398
Dpf1	10	0.12835	0.37972	287	6	-0.27028	0.37442	0.37593	270	0	-0.27028
Rps19	5	0.12915	0.30903	288	2	-0.24788	0.2389	0.23797	169	0	-0.24788
Smarcal1	10	0.12958	0.38223	289	6	-0.62185	0.33519	0.33694	241	0	-0.62185
Rcc1	5	0.13063	0.31194	290	2	-0.50267	0.33143	0.33161	237	0	-0.50267
2410016O06Rik	9	0.13184	0.37107	291	5	-0.43121	0.34771	0.34562	251	0	-0.43121
Tcf7l1	10	0.13398	0.39137	292	4	0.050481	0.38934	0.39129	285	0	0.050481
Il6	9	0.13438	0.37533	293	2	0.13026	0.0054693	0.0054476	4	1	0.13026
Brca2	10	0.13488	0.39315	294	5	0.060909	0.081458	0.081536	61	0	0.060909
Crebbp	11	0.1361	0.4036	295	7	-0.048218	0.6798	0.67786	488	0	-0.048218
Chaf1b	7	0.13661	0.35373	296	4	-0.53016	0.44932	0.44843	325	0	-0.53016
Rps17	4	0.13717	0.29289	297	3	-0.3234	0.84507	0.8456	616	0	-0.3234
Ednrb	11	0.13746	0.40593	298	6	-0.010032	0.4891	0.48813	354	0	-0.010032
Tcf19	11	0.13748	0.40598	299	5	0.11605	0.034443	0.034858	23	0	0.11605
Fos	10	0.13787	0.3989	300	7	-0.1437	0.48813	0.49062	352	0	-0.1437
H2-Q1	9	0.13851	0.38246	301	6	-0.4418	0.90295	0.902	651	0	-0.4418
Asf1a	8	0.13956	0.38227	302	4	0.045997	0.75956	0.75988	550	0	0.045997
Kir3dl1	10	0.14274	0.40819	303	7	-0.12441	0.8102	0.81216	588	0	-0.12441
Gm8909	11	0.14454	0.4183	304	5	0.10407	0.68032	0.67837	489	0	0.10407
Kat7	5	0.14598	0.33942	305	3	0.033685	0.40809	0.40879	297	0	0.033685
Cd40	9	0.14613	0.39611	306	6	-0.34752	0.78585	0.78453	566	0	-0.34752
Gatad2a	11	0.14688	0.42204	307	5	0.34508	0.098759	0.099339	71	0	0.34508
Taf10	9	0.1482	0.39985	308	5	-0.099822	0.43898	0.43654	318	0	-0.099822
Cdc73	8	0.14889	0.39831	309	4	-0.21685	0.1038	0.10397	75	0	-0.21685
Ing3	6	0.14936	0.36123	310	3	-0.14577	0.079662	0.078914	58	0	-0.14577
Supt6	4	0.1497	0.31197	311	3	-0.53016	0.40254	0.40044	293	0	-0.53016
Cd28	11	0.15079	0.42832	312	4	0.31234	0.80546	0.80586	585	0	0.31234
Kdm8	6	0.1514	0.36426	313	3	-0.087925	0.23106	0.22911	165	0	-0.087925
Kdm2a	10	0.15145	0.42527	314	4	0.20763	0.65952	0.66114	473	0	0.20763
Stat1	11	0.15258	0.43157	315	6	-0.51521	0.9548	0.95492	688	0	-0.51521
Setd7	11	0.153	0.43237	316	6	-0.032124	0.35081	0.35038	253	0	-0.032124
Smc1b	11	0.15359	0.43327	317	5	0.011666	0.15277	0.15294	114	0	0.011666
Jak2	10	0.15457	0.43095	318	5	-0.21847	0.066298	0.067227	46	0	-0.21847
Hdac3	8	0.15464	0.40694	319	3	0.13731	0.24288	0.24349	173	0	0.13731
Ring1	10	0.15515	0.43189	320	5	-0.17471	0.60807	0.60954	435	0	-0.17471
Mybl1	11	0.15762	0.43984	321	4	0.12707	0.71871	0.71818	516	0	0.12707
Hdac4	11	0.15815	0.44075	322	6	-0.0076312	0.38801	0.38686	284	0	-0.0076312
Sirt5	9	0.1594	0.41882	323	5	-0.45574	0.0078915	0.0079612	5	0	-0.45574
Nap1l5	10	0.16095	0.4424	324	6	0.017236	0.49914	0.50106	359	0	0.017236
Vegfa	11	0.16156	0.44626	325	7	-0.23527	0.35181	0.35131	254	0	-0.23527
Ccdc79	11	0.16224	0.44752	326	7	-0.22423	0.67927	0.67733	487	0	-0.22423
Plk1	3	0.16374	0.30819	327	2	-0.53016	0.5541	0.5526	402	0	-0.53016
Phf23	8	0.16574	0.4228	328	5	-0.14458	0.95345	0.95383	687	0	-0.14458
Vegfb	9	0.16737	0.43236	329	6	-0.34055	0.13545	0.134	102	0	-0.34055
Ube2a	11	0.16744	0.45593	330	7	-0.24659	0.44369	0.4429	323	0	-0.24659
Kmt2a	6	0.16746	0.38847	331	4	-0.7486	0.52393	0.52525	379	0	-0.7486
Eif3a	8	0.16764	0.42564	332	4	-0.44243	0.83088	0.82976	603	0	-0.44243
Prkaa1	9	0.1682	0.43374	333	5	-0.28945	0.37871	0.37647	275	0	-0.28945
Alkbh2	9	0.16925	0.43527	334	4	0.13691	0.53685	0.53485	389	0	0.13691
Tnfrsf9	10	0.1701	0.45908	335	7	-0.22782	0.039225	0.040162	27	0	-0.22782
Kmt2c	6	0.17043	0.39271	336	2	0.15184	0.28917	0.28803	209	0	0.15184
Uhrf1	10	0.17159	0.46183	337	5	0.1369	0.2868	0.2882	206	0	0.1369
Psmd1	9	0.17262	0.44097	338	5	-0.21306	0.078164	0.077885	56	0	-0.21306
Elmsan1	6	0.1739	0.39764	339	4	-0.32451	0.70809	0.7092	507	0	-0.32451
Wnk1	8	0.1741	0.43413	340	3	0.23419	0.059575	0.058242	41	0	0.23419
Prdm11	9	0.17489	0.44466	341	4	0.093362	0.71573	0.71369	514	0	0.093362
Phf7	7	0.1771	0.42242	342	3	-0.030759	0.7469	0.74678	542	0	-0.030759
Havcr2	9	0.17836	0.44986	343	6	-0.2267	0.5736	0.57188	414	0	-0.2267
Chd1l	10	0.17926	0.47256	344	5	0.15996	0.68577	0.68701	490	0	0.15996
Smarcd1	10	0.18089	0.47476	345	6	-0.084866	0.48143	0.48355	344	0	-0.084866
Flt4	11	0.18115	0.47835	346	6	-0.10397	0.17804	0.17773	129	0	-0.10397
Hif3a	9	0.18495	0.46064	347	6	-0.30988	0.84393	0.8426	614	0	-0.30988
Smarca5	8	0.18681	0.45269	348	1	0.59534	0.37285	0.37256	269	0	0.59534
Setdb2	11	0.18722	0.48788	349	7	-0.21535	0.71445	0.7138	512	0	-0.21535
Cd74	9	0.18787	0.46544	350	6	-0.056775	0.025892	0.02614	19	0	-0.056775
Pdcd1	11	0.188	0.48907	351	7	-0.0047237	0.038761	0.03944	26	0	-0.0047237
Ptger3	9	0.18854	0.46644	352	5	-0.016634	0.90597	0.90501	653	0	-0.016634
Smc4	7	0.18873	0.4417	353	2	-0.53016	0.059543	0.059479	40	0	-0.53016
Ctcfl	9	0.18955	0.46797	354	6	-0.76144	0.59372	0.59187	426	0	-0.76144
Baz1b	10	0.19303	0.49103	355	4	0.71574	0.33986	0.34139	244	0	0.71574
Akap1	11	0.19443	0.49919	356	6	-0.093094	0.94682	0.94741	685	0	-0.093094
Setdb1	10	0.19499	0.49342	357	6	-0.20238	0.62966	0.63117	455	0	-0.20238
Sirt4	11	0.19524	0.50051	358	7	-0.17374	0.53409	0.53379	387	0	-0.17374
Mapk3	11	0.19555	0.501	359	6	-0.035106	0.32	0.31983	227	0	-0.035106
Klrk1	8	0.19807	0.46816	360	4	-0.12485	0.26053	0.26102	191	0	-0.12485
Stat3	11	0.19818	0.50484	361	6	-0.52097	0.82379	0.82354	597	0	-0.52097
Setd1b	6	0.19862	0.43224	362	3	0.00059847	0.81749	0.81719	593	0	0.00059847
Kdm5b	11	0.20271	0.51226	363	6	0.10438	0.14635	0.14668	110	0	0.10438
Tcf3	11	0.20351	0.51342	364	5	0.30938	0.075458	0.075609	55	0	0.30938
Il17a	9	0.20405	0.49006	365	6	-0.41024	0.25575	0.25329	183	0	-0.41024
Slc26a1	11	0.20552	0.51677	366	7	-0.024388	0.37453	0.37347	271	0	-0.024388
Dpep3	9	0.20562	0.49218	367	5	0.005113	0.85912	0.85813	627	0	0.005113
Chd7	10	0.2057	0.50842	368	4	0.36237	0.54308	0.54463	393	0	0.36237
Tdrd6	11	0.20746	0.51961	369	7	-0.23109	0.80377	0.80408	584	0	-0.23109
Kat2a	11	0.20773	0.51999	370	7	-0.59926	0.54294	0.54295	392	0	-0.59926
Ptger2	10	0.20887	0.51248	371	4	0.33506	0.45927	0.46108	329	0	0.33506
Trim66	10	0.20935	0.51312	372	3	0.37109	0.091442	0.091452	68	0	0.37109
Phf14	9	0.20954	0.498	373	3	0.1211	0.77248	0.77044	559	0	0.1211
Stk31	8	0.21089	0.48547	374	4	-0.42417	0.80114	0.80027	580	0	-0.42417
Satb2	10	0.21208	0.51681	375	6	-0.36705	0.76814	0.76991	556	0	-0.36705
Cdyl	11	0.21237	0.52688	376	6	-0.26035	0.090597	0.091076	67	0	-0.26035
Brd9	11	0.21239	0.52691	377	5	0.19868	0.50895	0.50767	367	0	0.19868
Vdac1	9	0.21292	0.50327	378	6	-0.092749	0.97777	0.97748	703	0	-0.092749
Noc4l	4	0.21306	0.40342	379	3	-0.53016	0.67453	0.67365	484	0	-0.53016
Brd1	9	0.21447	0.50578	380	3	0.19167	0.85413	0.85293	623	0	0.19167
Asf1b	10	0.21704	0.52335	381	6	-0.43205	0.10868	0.10942	78	0	-0.43205
Smyd5	10	0.21738	0.52383	382	6	-0.35544	0.73493	0.73615	533	0	-0.35544
Map3k7	7	0.21839	0.48811	383	3	-0.53016	0.039585	0.039915	28	0	-0.53016
Mtf2	10	0.21916	0.52614	384	6	-0.11385	0.56914	0.57101	412	0	-0.11385
G2e3	11	0.22261	0.54228	385	4	0.29669	0.62337	0.62159	445	0	0.29669
Atad2	10	0.2227	0.53089	386	6	-0.074445	0.16095	0.16178	123	0	-0.074445
Rel	9	0.22327	0.51857	387	2	0.95172	0.0018261	0.0017961	2	1	0.95172
Tsc2	9	0.22423	0.52008	388	6	-0.085288	0.79196	0.79091	574	0	-0.085288
Cd80	11	0.22582	0.54679	389	7	-0.32816	0.42236	0.42167	305	0	-0.32816
Hmgn3	8	0.22664	0.50686	390	2	0.67813	0.62323	0.62294	444	0	0.67813
Lag3	10	0.22682	0.53581	391	5	0.022757	0.5377	0.53918	390	0	0.022757
Pten	11	0.22888	0.55094	392	7	-0.37208	0.3861	0.38478	282	0	-0.37208
Kat6a	6	0.23113	0.47708	393	4	-0.6134	0.081933	0.081269	62	0	-0.6134
Ccr4	10	0.23118	0.54148	394	6	-0.32995	0.55038	0.55187	399	0	-0.32995
Cxcl10	9	0.23204	0.53221	395	6	-0.47358	0.92012	0.91995	661	0	-0.47358
Baz2b	10	0.23313	0.54403	396	3	0.35662	0.36996	0.37135	265	0	0.35662
Sfmbt1	11	0.23393	0.55865	397	7	-0.051073	0.78761	0.7878	570	0	-0.051073
Cbx7	9	0.23503	0.53633	398	3	0.23692	0.57984	0.57844	417	0	0.23692
Sap18	6	0.23562	0.4831	399	3	-0.24985	0.26249	0.26138	195	0	-0.24985
Smarce1	9	0.23912	0.54179	400	5	-0.27678	0.18651	0.18488	135	0	-0.27678
Prdm9	11	0.23929	0.5661	401	6	-0.28927	0.34576	0.3453	248	0	-0.28927
Phf21a	11	0.2405	0.56782	402	5	0.28545	0.067105	0.066831	47	0	0.28545
Nap1l4	10	0.24056	0.55314	403	4	0.22238	0.6291	0.63058	454	0	0.22238
Mybl2	6	0.24186	0.49135	404	4	-0.53016	0.96063	0.96069	692	0	-0.53016
Rae1	8	0.24622	0.53164	405	3	0.0929	0.37859	0.37825	274	0	0.0929
Prmt2	10	0.24633	0.5602	406	5	0.21546	0.049621	0.050642	32	0	0.21546
B2m	10	0.24773	0.56195	407	6	-0.14474	0.58597	0.58797	423	0	-0.14474
Phf2	11	0.24848	0.57832	408	6	0.16554	0.35382	0.35331	256	0	0.16554
Phf11c	6	0.24867	0.50021	409	4	-0.21657	0.88737	0.88727	643	0	-0.21657
H2-D1	9	0.24992	0.55743	410	6	0.14575	0.83531	0.83381	608	0	0.14575
Smarcd3	11	0.25093	0.58163	411	5	0.26027	0.56158	0.56158	408	0	0.26027
Cbx2	8	0.25144	0.5381	412	3	0.77813	0.74058	0.74011	539	0	0.77813
Rnase12	9	0.25199	0.56047	413	5	-0.11665	0.40991	0.40722	298	0	-0.11665
Rbbp5	10	0.25385	0.56915	414	5	-0.0442	0.66106	0.66264	476	0	-0.0442
Tdrd1	11	0.25669	0.58916	415	7	-0.18982	0.73784	0.73709	537	0	-0.18982
Smad3	11	0.25728	0.58999	416	6	-0.056846	0.62885	0.62747	453	0	-0.056846
Prdm15	11	0.25816	0.59103	417	6	0.26873	0.32938	0.32894	234	0	0.26873
Suds3	7	0.25834	0.53485	418	3	0.027387	0.72261	0.72242	520	0	0.027387
Phip	10	0.2584	0.57432	419	5	-0.53016	0.86454	0.86467	630	0	-0.53016
Nt5e	10	0.25965	0.57575	420	6	-0.4002	0.37175	0.37323	268	0	-0.4002
Sirt1	11	0.26004	0.59359	421	5	0.22801	0.12549	0.1256	93	0	0.22801
Epas1	11	0.26203	0.59641	422	7	-0.041956	0.032999	0.033443	21	0	-0.041956
Kdm7a	6	0.26249	0.51785	423	2	0.34911	0.20794	0.20591	152	0	0.34911
Nat8	9	0.26368	0.57294	424	5	-0.42623	0.1236	0.12251	92	0	-0.42623
Hdac7	11	0.26402	0.59863	425	6	-0.022654	0.6147	0.61328	439	0	-0.022654
Hdgf	10	0.26452	0.58156	426	4	0.33559	0.55628	0.5577	404	0	0.33559
Prdm16	11	0.26535	0.60047	427	5	0.14909	0.50268	0.5018	364	0	0.14909
Rnf20	8	0.2655	0.55542	428	2	0.38163	0.18319	0.1837	133	0	0.38163
Chd3	10	0.26708	0.58447	429	4	0.14687	0.92244	0.92279	665	0	0.14687
Dpep1	11	0.26804	0.6041	430	7	-0.25151	0.53111	0.53049	384	0	-0.25151
Nkx2-1	11	0.26835	0.60448	431	6	-0.089436	0.38514	0.3839	280	0	-0.089436
Nf1	10	0.26964	0.58776	432	5	0.12402	0.36368	0.36497	263	0	0.12402
Setd4	11	0.27015	0.60685	433	7	-0.22399	0.61658	0.61526	440	0	-0.22399
Nfkb2	11	0.2724	0.6095	434	5	0.08213	0.33454	0.33424	239	0	0.08213
Rpl7	4	0.27281	0.48223	435	1	-0.53016	0.38693	0.38518	283	0	-0.53016
Phf19	11	0.27328	0.61082	436	6	-0.44728	0.82193	0.82192	596	0	-0.44728
Arg1	11	0.27805	0.61617	437	6	-0.10968	0.81175	0.81216	589	0	-0.10968
Pdcd1lg2	11	0.27918	0.61717	438	5	0.059556	0.63545	0.63401	460	0	0.059556
Jade1	6	0.28365	0.54459	439	3	-0.018004	0.11911	0.11802	90	0	-0.018004
Ube2b	8	0.28438	0.57833	440	4	-0.04101	0.26136	0.26176	193	0	-0.04101
Brpf1	10	0.28519	0.60653	441	6	-0.15724	0.42649	0.42884	308	0	-0.15724
Stat6	11	0.28586	0.624	442	6	-0.37547	0.73024	0.72974	528	0	-0.37547
Gm11127	9	0.28672	0.5969	443	5	-0.18078	0.31796	0.31558	224	0	-0.18078
Hmgn5	9	0.28846	0.59862	444	4	0.2059	0.73541	0.73357	534	0	0.2059
Taf5	7	0.28938	0.5667	445	3	-0.53016	0.72166	0.7216	519	0	-0.53016
Flt1	10	0.28979	0.61239	446	3	0.27645	0.31908	0.32039	226	0	0.27645
Tapbp	11	0.29099	0.62866	447	5	0.48493	0.83598	0.83631	610	0	0.48493
Prkab1	9	0.29421	0.60419	448	5	-0.16921	0.29687	0.295	214	0	-0.16921
Sin3b	9	0.29687	0.60669	449	5	-0.19778	0.87644	0.87557	635	0	-0.19778
Cramp1l	11	0.29907	0.63646	450	2	0.30424	0.75161	0.75155	543	0	0.30424
Cd70	11	0.29918	0.63657	451	6	-0.34823	0.88929	0.88996	646	0	-0.34823
Map2k2	10	0.29967	0.62345	452	6	-0.097723	0.075169	0.075579	54	0	-0.097723
Setd2	9	0.30136	0.61114	453	2	0.2651	0.78677	0.78542	569	0	0.2651
L3mbtl3	10	0.30164	0.62597	454	4	0.21783	0.5156	0.51768	371	0	0.21783
Suv39h2	11	0.30464	0.64212	455	5	0.19562	0.26905	0.26855	199	0	0.19562
Adora2b	9	0.30519	0.61476	456	5	-0.45824	0.55793	0.55641	405	0	-0.45824
Terf1	6	0.30671	0.57375	457	2	-0.53016	0.84698	0.84682	619	0	-0.53016
Kdm5d	11	0.30945	0.64706	458	5	0.051102	0.26117	0.26085	192	0	0.051102
Hmga1	6	0.31089	0.57883	459	3	0.0058385	0.064398	0.063585	44	0	0.0058385
Map2k1	9	0.31099	0.6203	460	3	0.64514	0.11271	0.1124	82	0	0.64514
Tgfb2	9	0.31295	0.6222	461	4	0.56016	0.16081	0.15913	122	0	0.56016
H2-DMb1	9	0.32056	0.63019	462	5	-0.22686	0.76653	0.76502	553	0	-0.22686
Dnajc1	9	0.32113	0.63082	463	4	-0.15613	0.45906	0.4567	328	0	-0.15613
H2-T23	10	0.32153	0.64853	464	5	0.13492	0.60397	0.60576	433	0	0.13492
Pml	11	0.32209	0.65947	465	5	0.13687	0.30196	0.30121	220	0	0.13687
Rcor1	9	0.32225	0.63203	466	3	0.10493	0.0702	0.069988	52	0	0.10493
Rpl23a	5	0.32264	0.55259	467	2	-0.44892	0.38114	0.38175	277	0	-0.44892
Arid1b	10	0.32273	0.64991	468	5	0.019156	0.79202	0.79365	575	0	0.019156
Icos	8	0.32307	0.62421	469	4	-0.44444	0.22313	0.22351	161	0	-0.44444
Prmt5	6	0.32439	0.5948	470	4	-0.53016	0.88117	0.88123	638	0	-0.53016
Glyr1	10	0.32596	0.65367	471	5	0.003338	0.60279	0.60464	432	0	0.003338
Mta2	10	0.32667	0.65449	472	5	-0.066911	0.46931	0.47121	336	0	-0.066911
Tnrc18	11	0.3279	0.66497	473	6	-0.027174	0.79584	0.7956	577	0	-0.027174
Zfp57	10	0.3281	0.65599	474	6	-0.28658	0.19833	0.19931	145	0	-0.28658
Cml1	9	0.32911	0.63843	475	5	-0.03363	0.71493	0.71292	513	0	-0.03363
H2-Q7	7	0.32983	0.60769	476	4	-0.047388	0.93816	0.93827	676	0	-0.047388
Alg13	11	0.32996	0.66676	477	6	-0.056456	0.93912	0.93992	677	0	-0.056456
Il2	9	0.33197	0.64135	478	4	0.072334	0.48462	0.48225	349	0	0.072334
Smc1a	5	0.33241	0.56214	479	1	-0.51329	0.28714	0.2873	207	0	-0.51329
Satl1	11	0.3325	0.66904	480	3	0.28273	0.10146	0.10217	74	0	0.28273
Alkbh3	10	0.3333	0.66156	481	4	0.07239	0.79659	0.79838	579	0	0.07239
Tdrd3	10	0.33691	0.66551	482	5	0.031591	0.70885	0.70967	508	0	0.031591
Whsc1l1	7	0.33719	0.61448	483	3	0.047568	0.32781	0.32828	231	0	0.047568
Pick1	9	0.33781	0.64682	484	4	-0.19678	0.65721	0.65554	471	0	-0.19678
Jmjd4	9	0.33847	0.64735	485	4	0.53275	0.6259	0.62479	450	0	0.53275
Kdr	11	0.33876	0.67518	486	6	-0.2359	0.43311	0.43229	312	0	-0.2359
Rpl9	2	0.34389	0.43868	487	1	-0.53016	0.57398	0.57371	415	0	-0.53016
Kat6b	6	0.34534	0.61895	488	3	-0.0027452	0.30131	0.30039	218	0	-0.0027452
Grn	10	0.3459	0.67586	489	5	-0.0015029	0.61155	0.61332	437	0	-0.0015029
Cd40lg	9	0.34842	0.65692	490	4	0.016648	0.034192	0.033977	22	0	0.016648
Bcor	10	0.34858	0.67891	491	6	-0.17082	0.54107	0.54277	391	0	-0.17082
Hdac11	10	0.34912	0.67959	492	5	-0.099818	0.76778	0.76958	555	0	-0.099818
Polr2b	8	0.34987	0.65499	493	4	-0.53016	0.082923	0.082269	63	0	-0.53016
Aire	8	0.35062	0.65594	494	5	-0.074694	0.93285	0.93307	671	0	-0.074694
Cxcr4	11	0.35348	0.68921	495	6	-0.16572	0.38323	0.38213	278	0	-0.16572
Shprh	10	0.35484	0.68582	496	6	-0.026693	0.80638	0.80807	586	0	-0.026693
Trim24	11	0.35613	0.69155	497	4	0.68575	0.47766	0.47677	341	0	0.68575
Nfe2l2	9	0.35647	0.66477	498	5	-0.15687	0.83798	0.83636	612	0	-0.15687
Cbx8	10	0.35741	0.68839	499	5	0.06121	0.71107	0.71182	510	0	0.06121
Btla	8	0.35845	0.66409	500	3	-0.18104	0.068773	0.067979	50	0	-0.18104
Smad2	8	0.36003	0.66584	501	5	0.049567	0.46182	0.46197	332	0	0.049567
Ado	10	0.36173	0.69274	502	6	-0.018174	0.83779	0.8386	611	0	-0.018174
Stk11	10	0.36249	0.69347	503	5	0.067317	0.20826	0.20935	153	0	0.067317
Smarca4	9	0.36419	0.67167	504	5	-0.014972	0.18854	0.18681	137	0	-0.014972
Dscam	11	0.36648	0.7004	505	4	0.052342	0.58826	0.58772	425	0	0.052342
Ttf1	11	0.36691	0.7007	506	6	0.0024298	0.43489	0.4341	315	0	0.0024298
Rela	10	0.36692	0.69809	507	5	-0.044838	0.68862	0.68971	492	0	-0.044838
Hdac9	11	0.3683	0.70201	508	5	0.19712	0.35582	0.35566	258	0	0.19712
Cd27	6	0.3689	0.63667	509	3	-0.035548	0.10439	0.10375	76	0	-0.035548
Kdm3b	11	0.36939	0.70284	510	5	0.17124	0.011112	0.011237	7	0	0.17124
Phf3	11	0.37185	0.70523	511	5	0.10837	0.49792	0.49717	357	0	0.10837
Piwil4	11	0.37469	0.70766	512	6	-0.0023789	0.66906	0.66722	480	0	-0.0023789
Stat5b	10	0.37562	0.70736	513	6	-0.079033	0.8836	0.88422	640	0	-0.079033
H2-DMb2	10	0.37595	0.70768	514	6	-0.154	0.29869	0.30022	216	0	-0.154
Pmp22	9	0.37609	0.68286	515	4	-0.054243	0.15032	0.14847	111	0	-0.054243
Nfs1	9	0.37631	0.68305	516	2	0.4363	0.024701	0.024794	18	0	0.4363
Psmb9	11	0.38039	0.7131	517	4	0.26624	0.5003	0.49959	361	0	0.26624
Fbxl19	11	0.38054	0.71318	518	4	0.43691	0.34677	0.34634	250	0	0.43691
Mrgbp	4	0.38075	0.58095	519	2	-0.52702	0.41423	0.41262	300	0	-0.52702
Ppargc1a	9	0.38197	0.68821	520	5	-0.26286	0.32056	0.3181	228	0	-0.26286
Brca1	11	0.38323	0.71564	521	1	0.83282	0.55235	0.5523	401	0	0.83282
Mbd2	10	0.38329	0.71335	522	4	0.45161	0.47083	0.47262	338	0	0.45161
Icosl	10	0.38455	0.71429	523	5	-0.032599	0.30164	0.303	219	0	-0.032599
Kdm5a	11	0.38729	0.71926	524	6	0.015459	0.36966	0.36879	264	0	0.015459
Ruvbl2	7	0.38736	0.66319	525	3	-0.39809	0.72324	0.72323	521	0	-0.39809
Phf8	9	0.38851	0.69402	526	3	0.41508	0.81462	0.81319	591	0	0.41508
Braf	9	0.38961	0.69496	527	5	-0.10839	0.72165	0.71946	518	0	-0.10839
Chmp5	6	0.3905	0.65286	528	2	-0.53016	0.28057	0.27918	202	0	-0.53016
Fbxo11	10	0.39136	0.71943	529	4	0.14021	0.23844	0.23986	168	0	0.14021
Hdac6	11	0.39209	0.72336	530	4	0.17731	0.0081596	0.0084461	6	1	0.17731
Atad2b	10	0.39343	0.72114	531	5	0.14507	0.18716	0.18784	136	0	0.14507
Ccl5	9	0.402	0.70621	532	5	-0.12895	0.6922	0.69027	500	0	-0.12895
Btg3	7	0.40222	0.67654	533	3	0.10373	0.93963	0.93988	679	0	0.10373
Supt5	5	0.40249	0.63284	534	3	-0.58972	0.94487	0.94576	684	0	-0.58972
H2-M3	9	0.40268	0.70684	535	4	0.24584	0.90417	0.90313	652	0	0.24584
Ing1	11	0.41236	0.74121	536	6	-0.12415	0.70917	0.7082	509	0	-0.12415
Arnt	11	0.41325	0.74189	537	5	0.37702	0.83512	0.83551	607	0	0.37702
Ube2n	6	0.41355	0.66936	538	3	-0.4381	0.21527	0.2131	159	0	-0.4381
Cxcl12	9	0.41428	0.71808	539	4	0.31093	0.22327	0.22094	162	0	0.31093
Sfmbt2	9	0.41531	0.71888	540	5	-0.23416	0.92765	0.92752	668	0	-0.23416
Ehmt2	11	0.41829	0.74623	541	5	0.10398	0.98523	0.98558	713	0	0.10398
Phrf1	10	0.41846	0.74004	542	5	0.21549	0.28379	0.28534	205	0	0.21549
Stat2	11	0.41986	0.74747	543	5	0.15895	0.49553	0.49461	356	0	0.15895
Rere	11	0.42052	0.74811	544	6	-0.087748	0.05586	0.055926	36	0	-0.087748
Egfr	11	0.42264	0.75009	545	3	0.54844	0.051611	0.05179	33	0	0.54844
Snai1	11	0.42326	0.75049	546	5	0.56236	0.1268	0.12687	94	0	0.56236
Eif3b	9	0.42454	0.7267	547	5	-0.41881	0.92366	0.92366	666	0	-0.41881
Tyw5	6	0.42474	0.67735	548	3	0.24937	0.81352	0.81345	590	0	0.24937
Smarcc2	11	0.4249	0.75199	549	6	-0.28505	0.77181	0.77192	558	0	-0.28505
Aurkc	8	0.42562	0.71563	550	3	0.47741	0.50494	0.50527	365	0	0.47741
Ehmt1	6	0.42636	0.67847	551	2	0.34925	0.32389	0.32308	229	0	0.34925
Baz1a	11	0.42976	0.75625	552	5	0.29043	0.2998	0.29916	217	0	0.29043
Kdm4b	9	0.43091	0.73205	553	4	0.11189	0.73353	0.73161	531	0	0.11189
Cd274	11	0.43167	0.758	554	5	0.068466	0.75906	0.75904	549	0	0.068466
Nelfa	6	0.43261	0.68298	555	2	0.26958	0.058234	0.057598	38	0	0.26958
Chd4	9	0.43297	0.73355	556	3	0.14272	0.30308	0.30098	221	0	0.14272
Ruvbl1	8	0.43447	0.72186	557	3	-0.10274	0.43545	0.43591	316	0	-0.10274
Whsc1	10	0.43488	0.75172	558	5	0.15305	0.2395	0.24119	171	0	0.15305
Kdm2b	11	0.43502	0.76084	559	6	-0.33806	0.068502	0.068138	49	0	-0.33806
Chd5	11	0.43577	0.76157	560	4	0.26383	0.37063	0.3698	267	0	0.26383
Mier2	11	0.43611	0.76185	561	6	-0.019552	0.32834	0.3281	232	0	-0.019552
Irf4	10	0.43708	0.7532	562	4	0.17554	0.20165	0.20263	148	0	0.17554
Pwwp2b	9	0.4389	0.73871	563	5	-0.14474	0.64527	0.64394	465	0	-0.14474
Mbd5	10	0.44034	0.7552	564	4	0.1509	0.36097	0.36206	262	0	0.1509
Scmh1	10	0.44083	0.75558	565	5	0.01601	0.3537	0.35536	255	0	0.01601
Padi4	10	0.44827	0.76116	566	4	0.56514	0.42813	0.43048	309	0	0.56514
Tap2	10	0.45791	0.7678	567	4	0.32059	0.65849	0.66032	472	0	0.32059
Nf2	11	0.46121	0.78209	568	6	-0.0030795	0.044492	0.044912	31	0	-0.0030795
Gmeb1	10	0.46191	0.77077	569	5	0.018572	0.25834	0.25979	187	0	0.018572
Nptxr	11	0.46749	0.7877	570	5	0.12294	0.13728	0.13681	103	0	0.12294
Hmg20b	11	0.47234	0.79153	571	5	0.067066	0.012585	0.012691	8	0	0.067066
Ltbr	10	0.47236	0.77809	572	4	0.53676	0.18941	0.19009	138	0	0.53676
H2-Q2	10	0.47588	0.7806	573	4	0.22081	0.9417	0.94226	682	0	0.22081
Kdm1a	11	0.47813	0.79608	574	5	0.17713	0.31895	0.31878	225	0	0.17713
Supt3	5	0.48097	0.70781	575	3	-0.073207	0.11757	0.11628	89	0	-0.073207
Arrb1	11	0.48132	0.79854	576	4	0.31667	0.47683	0.47597	340	0	0.31667
Mbtd1	10	0.48364	0.78611	577	3	0.35815	0.43949	0.4415	319	0	0.35815
Arg2	10	0.48546	0.78722	578	5	-0.047666	0.043135	0.044338	29	0	-0.047666
L3mbtl4	6	0.4855	0.72183	579	2	0.16224	0.15925	0.15768	120	0	0.16224
Rcor2	11	0.48607	0.80225	580	4	0.54173	0.15149	0.15155	112	0	0.54173
Deaf1	9	0.48728	0.78017	581	4	0.49784	0.52252	0.52017	376	0	0.49784
Rab33b	10	0.48797	0.78894	582	5	0.093055	0.29771	0.29906	215	0	0.093055
Asxl1	10	0.48887	0.7895	583	2	0.32154	0.72067	0.7215	517	0	0.32154
Suv420h2	9	0.48973	0.78219	584	4	0.29505	0.51808	0.51562	374	0	0.29505
Mapk1	9	0.49067	0.78278	585	5	0.11454	0.48664	0.48449	351	0	0.11454
Smarcc1	10	0.49898	0.79663	586	3	0.14126	0.78054	0.78218	562	0	0.14126
Il10	9	0.50436	0.7927	587	4	0.020261	0.66096	0.65905	475	0	0.020261
Prdm10	10	0.50537	0.80091	588	3	0.33669	0.26246	0.26389	194	0	0.33669
Smarcd2	10	0.50657	0.80167	589	4	0.09242	0.84926	0.84995	621	0	0.09242
Lbr	10	0.50937	0.8036	590	3	0.37585	0.1316	0.132	99	0	0.37585
Adora3	6	0.50971	0.73878	591	3	0.025524	0.41606	0.41659	301	0	0.025524
H2-Eb1	10	0.51049	0.80415	592	5	-0.060255	0.21372	0.21496	157	0	-0.060255
Jade2	6	0.51438	0.74235	593	3	0.018893	0.6194	0.62097	443	0	0.018893
Hyal1	11	0.51747	0.82214	594	4	0.30692	0.5473	0.54733	395	0	0.30692
Prkab2	10	0.51982	0.81022	595	3	0.16665	0.19943	0.20032	146	0	0.16665
Cd8a	10	0.52102	0.81114	596	5	0.054353	0.58658	0.58863	424	0	0.054353
Arid1a	11	0.5275	0.82751	597	5	0.19914	0.58425	0.58379	422	0	0.19914
Ints12	10	0.5282	0.81621	598	4	0.32638	0.5484	0.54992	397	0	0.32638
Carm1	9	0.53191	0.80813	599	1	0.90583	0.40301	0.40014	294	0	0.90583
Psmb10	10	0.53398	0.81968	600	4	0.28079	0.25523	0.25681	182	0	0.28079
Grhl1	10	0.53469	0.82012	601	4	0.050034	0.072642	0.073135	53	0	0.050034
Uty	11	0.53483	0.83135	602	2	0.25639	0.18177	0.18133	131	0	0.25639
Foxp3	10	0.53619	0.82111	603	3	0.078542	0.35916	0.36047	261	0	0.078542
Jmjd6	9	0.53725	0.81101	604	4	-0.41711	0.59754	0.59585	429	0	-0.41711
Tdrd12	8	0.53748	0.79486	605	3	0.15266	0.83338	0.83246	604	0	0.15266
Kif11	7	0.53784	0.78368	606	3	0.14558	0.48252	0.48123	346	0	0.14558
Dnmt3b	11	0.54218	0.83551	607	5	0.69981	0.15916	0.15954	119	0	0.69981
Traf7	6	0.54623	0.76526	608	2	0.26792	0.81808	0.81783	594	0	0.26792
Rsf1	11	0.55049	0.83977	609	4	0.4457	0.12812	0.12829	95	0	0.4457
Slc25a15	10	0.55106	0.83045	610	4	0.13906	0.065025	0.06598	45	0	0.13906
Hira	11	0.55245	0.84086	611	5	0.14568	0.0051995	0.0052794	3	1	0.14568
Hdac8	8	0.55679	0.8079	612	4	0.0060522	0.52619	0.52584	381	0	0.0060522
Naa60	6	0.56159	0.77705	613	3	-0.035139	0.20861	0.2065	154	0	-0.035139
Chd9	8	0.5621	0.8114	614	4	-0.15858	0.59466	0.59433	427	0	-0.15858
Atf7ip	10	0.56424	0.8386	615	5	0.074594	0.90632	0.90661	654	0	0.074594
Smad7	10	0.56758	0.84069	616	4	0.4808	0.93692	0.93728	672	0	0.4808
Jmjd7	10	0.57286	0.84414	617	5	0.028744	0.014124	0.013958	11	0	0.028744
Dido1	11	0.57325	0.85209	618	4	0.19224	0.23824	0.23765	167	0	0.19224
Jak1	11	0.57477	0.8528	619	5	0.016925	0.86307	0.86369	629	0	0.016925
Prdm14	11	0.57954	0.85543	620	3	0.68909	0.13467	0.13425	100	0	0.68909
Tsc1	10	0.58008	0.84867	621	5	-0.0019544	0.06757	0.068395	48	0	-0.0019544
Hdac1	8	0.5809	0.82376	622	3	0.06165	0.84761	0.84695	620	0	0.06165
Prmt3	10	0.58166	0.84971	623	5	0.15138	0.66915	0.67027	481	0	0.15138
Prdm13	11	0.5948	0.86293	624	5	0.072652	0.85245	0.85293	622	0	0.072652
Nat8l	9	0.59756	0.84368	625	4	0.036307	0.15453	0.15264	116	0	0.036307
Dnmt3l	9	0.60093	0.84565	626	3	0.97103	0.20458	0.20229	151	0	0.97103
Hif1an	11	0.60139	0.86641	627	3	0.10398	0.55592	0.55597	403	0	0.10398
Nhs	11	0.60231	0.86696	628	4	0.41811	0.92635	0.92734	667	0	0.41811
Pcgf6	10	0.60291	0.86261	629	5	0.0096948	0.11233	0.11292	81	0	0.0096948
Lrp5	9	0.60404	0.84724	630	4	0.042292	0.14504	0.14341	109	0	0.042292
Ccl17	9	0.60534	0.8479	631	4	0.25002	0.44479	0.4424	324	0	0.25002
Vegfc	9	0.60613	0.84832	632	4	0.72612	0.35765	0.35572	260	0	0.72612
Prmt7	9	0.61405	0.85214	633	3	0.098497	0.73466	0.73278	532	0	0.098497
Usp22	10	0.6252	0.87559	634	4	0.37642	0.1001	0.10044	73	0	0.37642
Proc	9	0.62613	0.85857	635	4	0.057989	0.15767	0.15576	117	0	0.057989
Mael	10	0.62632	0.87621	636	4	0.22834	0.053493	0.05459	35	0	0.22834
Sirt6	9	0.62708	0.85909	637	4	0.038586	0.65674	0.65512	470	0	0.038586
Tnfrsf14	10	0.63445	0.87925	638	4	0.095035	0.82128	0.82301	595	0	0.095035
Cdyl2	9	0.63747	0.86422	639	4	0.031939	0.39449	0.39193	291	0	0.031939
Tnfrsf4	9	0.63904	0.86504	640	4	0.1862	0.81679	0.81526	592	0	0.1862
Wrb	7	0.64211	0.8408	641	2	-0.13486	0.32983	0.3303	235	0	-0.13486
Supt4a	4	0.64711	0.78109	642	2	-0.5237	0.69347	0.69296	501	0	-0.5237
Smndc1	6	0.65181	0.84095	643	2	0.11638	0.52568	0.52721	380	0	0.11638
Trerf1	6	0.65498	0.8432	644	3	0.34019	0.34529	0.34502	247	0	0.34019
Tdrd5	10	0.65527	0.88666	645	3	0.77025	0.15166	0.15246	113	0	0.77025
Gfi1b	9	0.65884	0.87541	646	4	0.17484	0.68963	0.6877	495	0	0.17484
Areg	9	0.66742	0.87983	647	2	0.34567	0.34353	0.34122	246	0	0.34567
Ido1	10	0.66826	0.89149	648	4	0.76249	0.1961	0.19692	142	0	0.76249
Prmt8	9	0.67211	0.88222	649	3	0.15724	0.62793	0.62678	452	0	0.15724
Smad6	11	0.67405	0.90203	650	5	0.22434	0.6948	0.69349	502	0	0.22434
H2-Q10	8	0.67512	0.87565	651	3	0.2511	0.31522	0.31533	223	0	0.2511
Mbd3	10	0.67612	0.89486	652	4	0.13444	0.8346	0.83559	606	0	0.13444
Prdm4	10	0.67694	0.89524	653	4	0.074297	0.77881	0.78047	561	0	0.074297
Mllt3	6	0.68618	0.85502	654	2	0.2676	0.46798	0.46968	335	0	0.2676
Zzz3	10	0.68957	0.9001	655	4	0.12371	0.43465	0.43713	314	0	0.12371
Zfp541	10	0.69003	0.90027	656	4	0.27963	0.13517	0.13585	101	0	0.27963
Sirt7	9	0.69828	0.89574	657	4	0.28884	0.58096	0.57962	419	0	0.28884
Socs6	10	0.70072	0.90436	658	4	0.14884	0.052204	0.053304	34	0	0.14884
Taf5l	11	0.70159	0.91548	659	5	0.20067	0.64833	0.64713	467	0	0.20067
Kmt2d	6	0.71243	0.86524	660	1	0.58087	0.057461	0.056846	37	0	0.58087
Brpf3	8	0.71596	0.89261	661	2	0.41014	0.4574	0.45781	326	0	0.41014
Suv420h1	5	0.71869	0.84275	662	2	0.053798	0.68865	0.68911	493	0	0.053798
Paxip1	9	0.72322	0.90896	663	3	0.39118	0.35021	0.34816	252	0	0.39118
Wt1	10	0.72974	0.91588	664	4	0.21286	0.4616	0.46335	331	0	0.21286
H2-Ob	10	0.73234	0.91681	665	4	0.056201	0.71851	0.71943	515	0	0.056201
Kalrn	9	0.73935	0.91723	666	3	0.26548	0.21447	0.21228	158	0	0.26548
Kmt2e	6	0.74389	0.87766	667	2	0.53239	0.4119	0.41235	299	0	0.53239
Ash2l	7	0.75067	0.90008	668	1	0.74002	0.24783	0.24666	175	0	0.74002
Kmt2b	5	0.75085	0.86156	669	1	0.60868	0.39053	0.39125	286	0	0.60868
Tdrd9	11	0.75142	0.93329	670	3	0.3049	0.434	0.43312	313	0	0.3049
Jade3	6	0.75672	0.8829	671	1	0.76395	0.63016	0.63133	456	0	0.76395
Gzmn	9	0.75969	0.92457	672	3	0.63584	0.25668	0.25422	184	0	0.63584
Jun	10	0.76109	0.92877	673	4	0.37869	0.59865	0.60073	430	0	0.37869
Sp100	9	0.76412	0.92584	674	2	0.49541	0.13972	0.13805	105	0	0.49541
Ccl2	10	0.76741	0.93137	675	2	0.59246	0.20054	0.2015	147	0	0.59246
Ereg	9	0.77308	0.92852	676	2	0.23465	0.20954	0.20749	155	0	0.23465
Ino80	9	0.77389	0.92878	677	2	0.73526	0.27519	0.27326	200	0	0.73526
Arid2	10	0.785	0.93804	678	4	0.2952	0.33706	0.33854	242	0	0.2952
Tada1	10	0.78953	0.94002	679	4	0.10923	0.080204	0.080349	59	0	0.10923
Ctla4	9	0.78984	0.93361	680	2	0.25711	0.80854	0.80714	587	0	0.25711
Mbd4	9	0.79406	0.93488	681	3	0.48352	0.73912	0.73729	538	0	0.48352
C920025E04Rik	5	0.80113	0.89375	682	2	0.1263	0.327	0.32707	230	0	0.1263
Pcgf5	7	0.80265	0.92128	683	1	0.32597	0.39116	0.39076	289	0	0.32597
Rcor3	6	0.80432	0.90363	684	1	0.74181	0.34186	0.34159	245	0	0.74181
Rpl7a	6	0.80845	0.90553	685	1	0.46198	0.11545	0.11471	85	0	0.46198
H2-Aa	10	0.80958	0.94784	686	3	0.33621	0.096397	0.096548	69	0	0.33621
Smarca2	6	0.81211	0.90719	687	1	1.6826	0.036392	0.036224	25	0	1.6826
Taf1	8	0.81593	0.93542	688	3	0.046855	0.25719	0.25763	185	0	0.046855
Nsd1	10	0.81633	0.95056	689	4	0.46904	0.35644	0.35791	259	0	0.46904
Rbx1	7	0.82076	0.92714	690	1	0.71455	0.33919	0.33982	243	0	0.71455
Kdm5c	11	0.82181	0.95475	691	4	0.3393	0.72752	0.72712	525	0	0.3393
Prpf19	6	0.82222	0.91221	692	2	-0.53016	0.37	0.37	266	0	-0.53016
H2-Oa	10	0.82297	0.95304	693	4	0.1838	0.20275	0.20374	149	0	0.1838
Phf20l1	9	0.82652	0.94514	694	2	0.97861	0.13008	0.12899	97	0	0.97861
Supt7l	9	0.82704	0.94534	695	3	0.22534	0.14185	0.14047	107	0	0.22534
Nap1l1	7	0.834	0.93169	696	1	0.33183	0.65027	0.65024	468	0	0.33183
Sap130	11	0.84367	0.96194	697	3	0.17003	0.94108	0.94184	680	0	0.17003
Senp3	11	0.84455	0.96224	698	3	0.78911	0.13075	0.13046	98	0	0.78911
Mta1	10	0.85861	0.96252	699	3	0.38009	0.82582	0.82763	599	0	0.38009
H2-Bl	6	0.86733	0.93552	700	1	0.32592	0.4675	0.46924	334	0	0.32592
Pcgf2	9	0.87261	0.96154	701	2	0.34702	0.00060901	0.00067786	1	1	0.34702
Aanat	8	0.87602	0.95709	702	2	0.29587	0.62507	0.62482	446	0	0.29587
Yeats4	9	0.87796	0.96346	703	2	0.40653	0.21643	0.2143	160	0	0.40653
Lef1	10	0.88074	0.96821	704	3	0.76172	0.26349	0.265	196	0	0.76172
Yeats2	9	0.88912	0.96712	705	2	0.16558	0.17117	0.16941	127	0	0.16558
Smyd1	10	0.89727	0.97242	706	2	0.27371	0.23632	0.23786	166	0	0.27371
Rb1	11	0.90681	0.9795	707	3	0.22826	0.25208	0.25164	179	0	0.22826
Mmp9	11	0.91173	0.98033	708	3	0.48006	0.086491	0.086989	65	0	0.48006
Set	4	0.93313	0.93271	709	1	0.077294	0.29014	0.28883	211	0	0.077294
Cbx3	5	0.93528	0.94503	710	1	0.3207	0.62552	0.62503	448	0	0.3207
Hmga1-rs1	7	0.93825	0.97378	711	1	0.95341	0.39978	0.3995	292	0	0.95341
Stat5a	9	0.94172	0.98112	712	1	0.84782	0.28067	0.27885	203	0	0.84782
Control	703	0.94354	0.98702	713	325	0.086854	0.21176	0.21151	156	1	0.086854
Trp53	10	0.94464	0.98679	714	3	0.27118	0.27776	0.27948	201	0	0.27118
H2-Q6	10	0.95354	0.98835	715	2	0.35109	0.53158	0.53344	385	0	0.35109
Atp6v0c	4	0.96546	0.9654	716	0	0.33004	0.45927	0.45845	330	0	0.33004
Taf12	9	0.97135	0.98923	717	2	0.30302	0.64624	0.64489	466	0	0.30302
Jak3	11	0.97612	0.99433	718	2	0.5145	0.11755	0.11774	88	0	0.5145
Pcgf1	11	0.97831	0.99462	719	2	0.46613	0.11355	0.11397	84	0	0.46613
Tada2b	10	0.9884	0.99618	720	2	0.63747	0.29078	0.29215	212	0	0.63747
Trim33	10	0.98946	0.99652	721	1	0.75	0.2604	0.2617	189	0	0.75
Fbxw7	11	0.99018	0.99685	722	2	0.41052	0.021381	0.021598	16	0	0.41052
Myc	7	0.99173	0.99193	723	1	0.22729	0.87862	0.87875	637	0	0.22729
Phb	7	0.99305	0.99321	724	0	0.33069	0.25153	0.25097	178	0	0.33069
Rps7	6	0.99357	0.99373	725	0	0.68736	0.020534	0.019945	14	0	0.68736
Gmeb2	10	0.99842	0.99867	726	1	0.68802	0.012786	0.012672	9	0	0.68802
Gm10094	6	0.99864	0.99851	727	0	0.79473	0.54749	0.54884	396	0	0.79473

## Sheet: IC-IgG VS IC-PD1
id	num	neg|score	neg|p-value	neg|rank	neg|goodsgrna	neg|lfc	pos|score	pos|p-value	pos|rank	pos|goodsgrna	pos|lfc
Ctnnb1	8	0.00041797	0.0028747	1	7	-0.73573	0.96404	0.96343	697	0	-0.73573
Tdrkh	8	0.00059801	0.0036763	2	6	-0.53694	0.096479	0.097211	68	0	-0.53694
Smarca1	11	0.00080099	0.0062195	3	5	0.25326	0.17028	0.16904	112	0	0.25326
Asf1a	7	0.00080488	0.004656	4	7	-0.80588	0.9992	0.99919	727	0	-0.80588
Cdc5l	3	0.0010923	0.0030331	5	3	-0.53694	0.9951	0.99499	723	0	-0.53694
Ctcf	8	0.0018356	0.011078	6	6	-0.53694	0.90646	0.90555	653	0	-0.53694
Baz2b	9	0.0019651	0.013117	7	4	-0.19774	0.17095	0.16962	113	0	-0.19774
Ncor2	8	0.0021058	0.012681	8	6	-0.58885	0.88631	0.88559	640	0	-0.58885
Uhrf2	9	0.002137	0.013968	9	5	-0.53694	0.91217	0.91044	659	0	-0.53694
Kdm5a	10	0.0022488	0.014591	10	8	-0.54152	0.70678	0.70788	517	0	-0.54152
Klrk1	8	0.00254	0.014839	11	5	-0.58296	0.37951	0.37901	265	0	-0.58296
Mta3	9	0.0033134	0.020608	12	8	-0.92756	0.93403	0.93278	674	0	-0.92756
Smc3	7	0.0034241	0.018124	13	6	-0.53694	0.94982	0.94972	686	0	-0.53694
Taf1	7	0.0035639	0.018876	14	6	-0.53694	0.98728	0.98724	716	0	-0.53694
Lgals9	11	0.0037617	0.024893	15	8	-0.68506	0.69124	0.69199	504	0	-0.68506
Alkbh3	9	0.0045721	0.026585	16	5	-0.31191	0.15641	0.1545	106	0	-0.31191
Phf8	9	0.0046658	0.02709	17	5	-0.20499	0.78293	0.78232	567	0	-0.20499
Psma3	4	0.0047998	0.016996	18	4	-0.52535	0.98632	0.98617	714	0	-0.52535
Hdac10	11	0.0050141	0.031681	19	7	-0.53377	0.75305	0.75467	547	0	-0.53377
H2-DMa	5	0.00536	0.022003	20	3	-0.74256	0.42703	0.42909	306	0	-0.74256
Pten	11	0.0054425	0.034027	21	10	-0.44229	0.99917	0.99913	726	0	-0.44229
Mapk3	11	0.0055312	0.034591	22	10	-0.81331	0.33455	0.33355	231	0	-0.81331
Hemk1	10	0.0057338	0.034492	23	8	-0.31006	0.95312	0.95237	688	0	-0.31006
Bahd1	11	0.0063251	0.038727	24	9	-0.39227	0.52609	0.52584	373	0	-0.39227
Mta2	10	0.0066922	0.039578	25	7	-0.7633	0.63759	0.63824	470	0	-0.7633
Ruvbl1	9	0.00691	0.037807	26	6	-0.6018	0.90769	0.90585	655	0	-0.6018
Hif1a	11	0.0071705	0.042418	27	6	-4.61e-05	0.069047	0.069513	47	1	-4.61e-05
Dnmt3b	11	0.0071879	0.042507	28	7	-0.66607	0.52446	0.52422	370	0	-0.66607
Tsc1	10	0.0072843	0.042626	29	9	-1.0724	0.099417	0.1	70	0	-1.0724
H2-M3	9	0.0076284	0.0413	30	4	0.4027	0.47518	0.47329	339	0	0.4027
Rnase12	7	0.0077968	0.039093	31	5	-0.53694	0.95784	0.95813	690	0	-0.53694
Atad2b	10	0.007984	0.045733	32	6	-0.52997	0.8894	0.88879	642	0	-0.52997
Pax5	10	0.0080573	0.046001	33	5	-0.006841	0.30526	0.30691	207	0	-0.006841
Eng	10	0.0084319	0.04795	34	6	-0.72934	0.19286	0.19353	127	0	-0.72934
Grhl1	9	0.0090702	0.048188	35	7	-0.58178	0.8153	0.81427	589	0	-0.58178
Grn	10	0.0094294	0.052957	36	6	-0.73524	0.9702	0.97036	701	0	-0.73524
Prkaa2	10	0.0096781	0.054085	37	8	-0.79319	0.99551	0.99531	725	0	-0.79319
Kdm4d	8	0.00984	0.04796	38	5	-0.53694	0.67231	0.67324	492	0	-0.53694
Ing3	6	0.01049	0.046505	39	4	-0.53694	0.57638	0.57683	407	0	-0.53694
Prdm14	10	0.010518	0.05836	40	8	-0.79829	0.15983	0.16099	108	0	-0.79829
Prdm13	11	0.011644	0.062972	41	8	-0.55855	0.33676	0.33567	234	0	-0.55855
Mgea5	9	0.011931	0.061072	42	4	0.20806	0.47592	0.47399	340	0	0.20806
Sfmbt1	11	0.011954	0.064318	43	6	-0.45827	0.51748	0.51702	364	0	-0.45827
Brd1	8	0.012172	0.057351	44	3	-0.24965	0.60966	0.61016	438	0	-0.24965
Ruvbl2	8	0.012318	0.057945	45	5	-0.53694	0.25186	0.25261	168	0	-0.53694
Smarcal1	9	0.012388	0.063031	46	7	-0.42172	0.71625	0.71486	526	0	-0.42172
Il4	8	0.01261	0.059093	47	6	-0.55476	0.72258	0.7219	533	0	-0.55476
Mier3	9	0.012623	0.064001	48	7	-0.75885	0.59713	0.59527	426	0	-0.75885
Chd8	11	0.013538	0.071185	49	6	-0.2285	0.87432	0.87525	629	0	-0.2285
Smarcad1	9	0.014982	0.074293	50	7	-0.58634	0.45412	0.45192	328	0	-0.58634
Mllt10	8	0.015049	0.06794	51	5	-0.53694	0.69733	0.69754	510	0	-0.53694
Nfs1	7	0.015081	0.065565	52	5	-0.53694	0.61838	0.61826	448	0	-0.53694
Chd3	10	0.016391	0.082249	53	7	-0.41929	0.93348	0.93214	673	0	-0.41929
Rai1	10	0.016628	0.08311	54	3	0.62537	0.16603	0.1673	110	0	0.62537
Kdm4b	9	0.016635	0.08118	55	8	-0.96561	0.9943	0.9942	722	0	-0.96561
Msh6	10	0.016899	0.084179	56	7	-0.79527	0.22007	0.22105	142	0	-0.79527
Prdm12	7	0.017388	0.073531	57	5	-0.68966	0.29662	0.29671	200	0	-0.68966
Nat8	8	0.01754	0.077261	58	6	-0.53694	0.81102	0.81144	588	0	-0.53694
Phf2	10	0.017589	0.087048	59	7	-0.55141	0.84116	0.84138	602	0	-0.55141
Caprin2	8	0.017923	0.078667	60	4	-0.12548	0.55258	0.55209	395	0	-0.12548
Tnfrsf9	10	0.018062	0.089225	61	6	-0.46236	0.57809	0.57891	412	0	-0.46236
Prkaa1	7	0.018306	0.076767	62	3	-0.22898	0.66767	0.66791	486	0	-0.22898
Dpep3	7	0.018797	0.078419	63	5	-0.53694	0.912	0.91219	658	0	-0.53694
Rnf17	11	0.019403	0.096044	64	7	-0.21088	0.86214	0.86348	619	0	-0.21088
Brd7	7	0.019718	0.081685	65	2	0.43807	0.64101	0.6407	472	0	0.43807
Ep400	9	0.019833	0.094253	66	7	-0.53266	0.94354	0.94245	681	0	-0.53266
Kat8	5	0.020091	0.073917	67	3	-0.53694	0.94247	0.94305	680	0	-0.53694
Epc2	8	0.020525	0.088473	68	4	-0.13028	0.86571	0.86515	623	0	-0.13028
Stk11	9	0.02113	0.098963	69	6	-0.28913	0.97521	0.97482	708	0	-0.28913
Cd40	8	0.02134	0.091185	70	7	-0.53694	0.76857	0.7687	555	0	-0.53694
Cxcl10	9	0.021428	0.099982	71	5	-0.040627	0.71881	0.71732	529	0	-0.040627
Hr	8	0.021707	0.092451	72	5	-0.54939	0.72029	0.71959	530	0	-0.54939
Piwil4	11	0.021796	0.10571	73	8	-0.4881	0.4847	0.48407	347	0	-0.4881
Braf	9	0.022555	0.10388	74	7	-0.60888	0.42111	0.419	301	0	-0.60888
Prmt10	10	0.022953	0.10771	75	7	-0.54699	0.33612	0.3377	233	0	-0.54699
Ep300	11	0.0231	0.11107	76	6	-0.85256	0.96464	0.96543	699	0	-0.85256
Kdm6b	9	0.023237	0.10638	77	6	-0.30771	0.92026	0.91905	663	0	-0.30771
Prpf19	5	0.023488	0.085138	78	5	-0.53694	0.97651	0.97628	710	0	-0.53694
Wrb	7	0.023871	0.095717	79	5	-0.53694	0.10089	0.10036	71	0	-0.53694
Dscam	10	0.024462	0.11342	80	7	-0.53694	0.92889	0.92766	669	0	-0.53694
Trim33	10	0.024515	0.11366	81	4	0.12094	0.1333	0.13472	93	0	0.12094
Ehmt1	6	0.025235	0.095133	82	4	-1.1584	0.96517	0.96568	700	0	-1.1584
Phf20	4	0.025484	0.079587	83	3	-0.53694	0.92809	0.92783	666	0	-0.53694
Rps7	4	0.025559	0.079805	84	4	-0.53694	0.97444	0.9741	707	0	-0.53694
Sin3a	8	0.026205	0.10894	85	6	-0.53694	0.62697	0.62722	457	0	-0.53694
Scml2	8	0.02627	0.10922	86	5	-0.24319	0.36477	0.36441	250	0	-0.24319
Prmt6	11	0.026482	0.12485	87	8	-0.15032	0.81058	0.81133	587	0	-0.15032
Baz1b	9	0.02656	0.11697	88	4	0.066065	0.746	0.74436	546	0	0.066065
Smarca4	9	0.027798	0.1209	89	4	-0.12865	0.51654	0.51433	362	0	-0.12865
Sat1	10	0.028058	0.1269	90	7	-0.67233	0.8774	0.87721	633	0	-0.67233
Mphosph8	4	0.028448	0.088068	91	2	-0.53694	0.86734	0.86776	624	0	-0.53694
4632428N05Rik	11	0.028534	0.1328	92	8	-0.41419	0.80266	0.80342	579	0	-0.41419
Vdac1	7	0.028769	0.11226	93	6	-0.70615	0.88128	0.88224	638	0	-0.70615
Alg10b	7	0.029488	0.11442	94	5	-0.53694	0.66368	0.66397	478	0	-0.53694
Nf2	11	0.030357	0.14022	95	9	-0.37746	0.29009	0.28915	194	0	-0.37746
Asf1b	10	0.030401	0.13513	96	7	-0.64978	0.7177	0.71864	528	0	-0.64978
Smyd2	10	0.030766	0.13644	97	6	-0.34577	0.69748	0.69855	511	0	-0.34577
Lag3	10	0.030885	0.13694	98	5	0.11656	0.9406	0.93955	679	0	0.11656
Cdyl	11	0.031489	0.14443	99	6	-0.38714	0.83791	0.83912	599	0	-0.38714
Pcgf6	10	0.0323	0.14232	100	7	-0.53694	0.78151	0.78211	565	0	-0.53694
Ube2a	11	0.032329	0.14728	101	9	-0.52385	0.97646	0.97687	709	0	-0.52385
Rnf2	10	0.032477	0.143	102	6	-0.53694	0.43812	0.4393	318	0	-0.53694
Pcgf5	7	0.033037	0.12571	103	6	-0.86657	0.75896	0.75834	550	0	-0.86657
Smarca2	6	0.033185	0.11808	104	2	0.39807	0.82785	0.82712	595	0	0.39807
Atad2	9	0.033265	0.1381	105	5	-0.51454	0.71346	0.71203	524	0	-0.51454
Arrb1	11	0.033435	0.15101	106	8	-0.41765	0.40003	0.3991	285	0	-0.41765
Trp53	10	0.034686	0.14993	107	8	-0.73431	0.056079	0.057826	41	1	-0.73431
Rab33b	10	0.034833	0.15053	108	7	-0.56007	0.013754	0.017016	14	1	-0.56007
Akap1	10	0.035126	0.15148	109	6	-0.17194	0.91466	0.91309	662	0	-0.17194
Prdm2	10	0.035534	0.15288	110	6	-0.3081	0.4232	0.42508	303	0	-0.3081
H2-Q2	10	0.035894	0.15402	111	5	0.32875	0.55615	0.55618	397	0	0.32875
Mis18bp1	6	0.036162	0.12639	112	3	-0.53694	0.54102	0.54207	386	0	-0.53694
Morf4l1	6	0.036162	0.12639	113	3	-0.53694	0.26579	0.26539	178	0	-0.53694
Tinagl1	8	0.036253	0.14259	114	5	-0.83281	0.029337	0.029237	23	1	-0.83281
Tdrd12	7	0.036635	0.13706	115	1	0.76898	0.62371	0.62334	454	0	0.76898
Dpf3	11	0.03705	0.16242	116	8	-0.50121	0.72121	0.72215	531	0	-0.50121
Lrp5	9	0.037394	0.15047	117	7	-0.38789	0.38208	0.37963	269	0	-0.38789
Ezh1	10	0.037954	0.1609	118	7	-0.73631	0.98985	0.98988	718	0	-0.73631
Kat2b	10	0.038825	0.16366	119	5	-0.34002	0.23736	0.23845	156	0	-0.34002
Mllt1	10	0.039349	0.16558	120	5	-0.10763	0.39043	0.39231	280	0	-0.10763
Chd1	8	0.039411	0.15138	121	5	-0.35374	0.39168	0.39129	281	0	-0.35374
Cd40lg	8	0.039433	0.15144	122	6	-0.53694	0.192	0.19274	126	0	-0.53694
Mbd5	10	0.040196	0.16846	123	6	-0.28604	0.83247	0.83293	596	0	-0.28604
Jmjd8	9	0.040357	0.15913	124	7	-0.45164	0.83477	0.83308	597	0	-0.45164
Bptf	7	0.040539	0.14913	125	5	-0.46531	0.87779	0.8787	634	0	-0.46531
Ccnt2	10	0.04128	0.17215	126	6	-0.33671	0.75496	0.75526	549	0	-0.33671
Chd4	9	0.041314	0.162	127	6	-0.53694	0.71346	0.71203	523	0	-0.53694
Dxo	5	0.041355	0.13304	128	3	-0.70695	0.20844	0.208	135	0	-0.70695
Thbs1	8	0.041815	0.15768	129	5	-0.074467	0.51802	0.51788	366	0	-0.074467
Sirt1	11	0.043781	0.1823	130	6	-0.10042	0.0071879	0.012454	10	1	-0.10042
Map2k2	10	0.044141	0.1813	131	7	-1.2122	0.13968	0.14123	99	0	-1.2122
Hdac6	10	0.044248	0.18173	132	8	-0.28659	0.94504	0.94402	683	0	-0.28659
Taf3	9	0.044355	0.17102	133	4	-0.5299	0.58289	0.5811	417	0	-0.5299
Stat5a	9	0.045596	0.17468	134	7	-0.59807	0.3261	0.32395	221	0	-0.59807
Cbx8	8	0.045826	0.16871	135	6	-0.40467	0.80747	0.80796	581	0	-0.40467
Dnmt3a	11	0.045932	0.18887	136	7	-0.94167	0.31889	0.31828	216	0	-0.94167
Cd80	10	0.046011	0.18717	137	8	-0.65219	0.31775	0.31915	214	0	-0.65219
Tcf7l1	8	0.0462	0.16992	138	6	-0.58168	0.97157	0.97093	706	0	-0.58168
Hif1an	9	0.046544	0.17757	139	6	-0.53694	0.77522	0.77444	560	0	-0.53694
Phf6	4	0.046655	0.13636	140	3	-0.53694	0.40617	0.40372	289	0	-0.53694
Nf1	10	0.047747	0.19222	141	4	0.19365	0.36766	0.36908	253	0	0.19365
Tapbp	11	0.047807	0.19409	142	1	0.76251	0.22153	0.22073	143	0	0.76251
Cd70	11	0.048269	0.19544	143	5	0.52464	0.57706	0.57725	409	0	0.52464
Mbd6	10	0.049141	0.19653	144	5	-0.21998	0.11781	0.11841	85	0	-0.21998
Zmynd8	10	0.049488	0.19766	145	6	-0.29578	0.5926	0.59378	422	0	-0.29578
Prr14	7	0.049784	0.17575	146	4	-0.53694	0.40488	0.4044	287	0	-0.53694
Sirt5	9	0.050208	0.18827	147	7	-0.46151	0.61433	0.61243	441	0	-0.46151
Snapc4	8	0.050342	0.18048	148	6	-0.53694	0.71528	0.71476	525	0	-0.53694
Suv39h1	9	0.050394	0.18875	149	7	-0.53252	0.49837	0.49623	352	0	-0.53252
Icos	8	0.050703	0.18142	150	4	-0.0042162	0.68525	0.68561	500	0	-0.0042162
Setdb2	10	0.050753	0.20145	151	4	0.024431	0.32392	0.32542	217	0	0.024431
Setd6	11	0.050868	0.20282	152	4	0.31391	0.51542	0.51517	361	0	0.31391
Wt1	10	0.051635	0.20421	153	7	-0.26192	0.91002	0.90854	656	0	-0.26192
Mapk1	9	0.051867	0.19331	154	6	-0.049551	0.60466	0.6026	431	0	-0.049551
Arg2	10	0.053216	0.20888	155	6	-0.92482	0.48081	0.4818	343	0	-0.92482
Phf13	9	0.053599	0.19796	156	6	-0.19819	0.94899	0.94788	685	0	-0.19819
Hif3a	9	0.053929	0.19888	157	7	-0.45368	0.98706	0.98621	715	0	-0.45368
Stk31	7	0.054941	0.19092	158	5	-0.26469	0.60201	0.60133	430	0	-0.26469
Smyd5	10	0.05639	0.21783	159	6	-0.46068	0.93335	0.93201	672	0	-0.46068
Arid4a	11	0.056471	0.21828	160	5	0.28925	0.21126	0.21027	137	0	0.28925
Jade2	6	0.056597	0.17818	161	5	-0.203	0.10879	0.10752	77	0	-0.203
Hmga1	6	0.057378	0.18004	162	4	-0.60816	0.89052	0.88973	643	0	-0.60816
Rps6ka5	8	0.057457	0.19905	163	5	-0.47305	0.76267	0.76266	554	0	-0.47305
Setd1b	6	0.058406	0.18269	164	5	-0.40529	0.88429	0.88342	639	0	-0.40529
Ncor1	8	0.05854	0.2016	165	3	0.28925	0.19874	0.19949	130	0	0.28925
Hat1	9	0.059539	0.21408	166	6	-0.56159	0.7421	0.74058	545	0	-0.56159
H2-K1	11	0.061511	0.23237	167	3	0.29396	0.53735	0.53769	384	0	0.29396
Mina	9	0.062725	0.22302	168	4	-0.36895	0.62047	0.61839	452	0	-0.36895
Traf7	6	0.063381	0.19505	169	3	0.064403	0.33705	0.33719	235	0	0.064403
Phf12	7	0.064043	0.21462	170	4	-0.46086	0.64312	0.6428	474	0	-0.46086
Relb	11	0.064532	0.2403	171	7	-0.19599	0.016699	0.020905	15	1	-0.19599
Chd9	8	0.065334	0.21911	172	5	-0.53694	0.73119	0.73064	537	0	-0.53694
Nap1l5	10	0.068274	0.247	173	7	-0.16444	0.33309	0.33455	229	0	-0.16444
Trim24	10	0.069444	0.24971	174	4	0.010762	0.18441	0.18511	122	0	0.010762
Terf1	6	0.070846	0.21283	175	2	-0.53694	0.36808	0.36819	254	0	-0.53694
Lef1	10	0.070853	0.25293	176	7	-0.50079	0.84337	0.84375	603	0	-0.50079
Baz2a	10	0.071184	0.25371	177	5	0.14288	0.57742	0.57819	410	0	0.14288
Snai1	11	0.072172	0.26086	178	7	-0.26063	0.067544	0.068078	46	1	-0.26063
Tgfb2	8	0.072748	0.23786	179	3	0.29988	0.75359	0.75339	548	0	0.29988
Hira	11	0.072821	0.26266	180	8	-0.18904	0.27109	0.27051	183	0	-0.18904
Ctcfl	9	0.072916	0.25037	181	5	-0.33346	0.19071	0.18953	125	0	-0.33346
Sirt6	9	0.074369	0.25441	182	7	-0.41796	0.08389	0.083288	57	1	-0.41796
H2-Q10	7	0.074813	0.23734	183	5	-0.43267	0.93869	0.93847	675	0	-0.43267
Setd5	11	0.07489	0.26828	184	8	-0.13629	0.047807	0.049949	36	1	-0.13629
Phf10	10	0.075265	0.26338	185	4	0.34308	0.41246	0.41408	296	0	0.34308
Asxl3	9	0.075365	0.25709	186	5	-0.60681	0.48617	0.48411	349	0	-0.60681
Tsc2	9	0.075878	0.25841	187	7	-0.90092	0.071689	0.071215	48	1	-0.90092
Mysm1	5	0.076172	0.20725	188	3	-0.53694	0.57897	0.58038	414	0	-0.53694
Lrp6	11	0.076528	0.27276	189	2	0.7961	0.59291	0.59305	423	0	0.7961
Pwwp2a	8	0.077103	0.24861	190	5	-0.47416	0.91395	0.91326	660	0	-0.47416
Prkab1	9	0.077313	0.262	191	6	-0.85295	0.25057	0.24797	167	0	-0.85295
Nfe2l2	9	0.077486	0.26253	192	6	-0.68156	0.66753	0.6654	485	0	-0.68156
Gmeb1	10	0.077977	0.26973	193	6	-0.21575	0.14729	0.14877	101	0	-0.21575
Stat4	9	0.078389	0.26465	194	6	-0.41657	0.38719	0.38445	278	0	-0.41657
Cdk9	6	0.078998	0.2326	195	1	-0.15758	0.48189	0.48314	345	0	-0.15758
Rbm14	10	0.080718	0.27614	196	6	-0.11076	0.58606	0.58732	420	0	-0.11076
Bcor	10	0.081527	0.27809	197	6	-0.64823	0.66085	0.66138	477	0	-0.64823
Taf10	9	0.081535	0.27248	198	6	-0.32248	0.085103	0.084367	59	1	-0.32248
Kdm2a	8	0.082224	0.26053	199	3	-0.063	0.054039	0.053403	40	1	-0.063
Nat10	9	0.082964	0.27638	200	6	-0.51414	0.77919	0.7783	563	0	-0.51414
Brwd3	9	0.08389	0.2788	201	3	0.53497	0.24854	0.24594	165	0	0.53497
Ash1l	9	0.084546	0.28023	202	4	-0.059785	0.034215	0.035283	29	1	-0.059785
Hdac5	10	0.085209	0.28645	203	7	-0.53535	0.70241	0.70366	515	0	-0.53535
Dpf1	10	0.08607	0.28866	204	7	-0.50086	0.99427	0.99412	721	0	-0.50086
Hdac3	4	0.086266	0.21371	205	3	-0.53694	0.19509	0.1955	128	0	-0.53694
Rpl7	2	0.086895	0.14919	206	1	-0.53694	0.37199	0.3708	257	0	-0.53694
Chd2	9	0.087523	0.28744	207	4	-0.53694	0.11847	0.11724	86	0	-0.53694
2610002M06Rik	8	0.087912	0.2735	208	3	0.2271	0.38562	0.38516	275	0	0.2271
Tnfrsf14	10	0.088883	0.29513	209	7	-0.70761	0.6016	0.60223	429	0	-0.70761
Asxl1	10	0.089586	0.29687	210	7	-0.52762	0.92862	0.92735	668	0	-0.52762
Shprh	10	0.0897	0.29713	211	4	0.51211	0.29893	0.30031	203	0	0.51211
Smc4	4	0.090379	0.22054	212	3	-0.53694	0.87934	0.87955	636	0	-0.53694
Cd8a	10	0.09143	0.30112	213	5	0.024982	0.38198	0.38372	268	0	0.024982
Map3k12	11	0.091853	0.31212	214	8	-0.20088	0.45316	0.45232	327	0	-0.20088
Sap130	9	0.092043	0.29773	215	3	0.10593	0.34524	0.34338	241	0	0.10593
Kras	4	0.092471	0.22378	216	2	-0.48856	0.0095808	0.010356	12	1	-0.48856
Cbx1	8	0.093275	0.28577	217	4	-0.18291	0.45568	0.4556	329	0	-0.18291
Kdm2b	11	0.093515	0.31615	218	8	-0.53244	0.66554	0.66536	482	0	-0.53244
Snd1	11	0.093679	0.31651	219	8	-0.93993	0.63407	0.63396	463	0	-0.93993
Atp6v0c	1	0.093969	0.094441	220	1	-0.53694	0.90603	0.90684	651	0	-0.53694
Smyd4	8	0.095864	0.29132	221	6	-0.7687	0.26264	0.26326	175	0	-0.7687
Tcf19	11	0.095995	0.32225	222	8	-0.15876	0.17163	0.17049	114	0	-0.15876
Tnfsf4	11	0.096163	0.32264	223	8	-0.17593	0.85231	0.85352	613	0	-0.17593
Set	3	0.096581	0.21591	224	1	-0.53694	0.34519	0.3443	240	0	-0.53694
H2-T23	9	0.096734	0.3073	225	6	-0.23998	0.86833	0.86687	625	0	-0.23998
Cd86	10	0.097187	0.31374	226	5	-0.0021716	0.29042	0.29184	195	0	-0.0021716
Prmt3	10	0.097288	0.31397	227	7	-0.77782	0.25767	0.25882	173	0	-0.77782
Kat7	5	0.098911	0.25414	228	3	-0.3574	0.09757	0.096875	69	0	-0.3574
Glt28d2	8	0.10192	0.30428	229	6	-0.50683	0.33519	0.33507	232	0	-0.50683
Prkab2	10	0.10207	0.32508	230	3	1.2611	0.047747	0.04981	35	1	1.2611
Pdcd1	11	0.10232	0.33771	231	8	-0.83258	0.22281	0.22217	144	0	-0.83258
Carm1	6	0.1026	0.28581	232	2	-0.41304	0.42541	0.42566	305	0	-0.41304
Arid1b	10	0.10308	0.32745	233	5	-0.033763	0.26873	0.27044	181	0	-0.033763
Prmt2	9	0.1032	0.31932	234	5	-0.1605	0.38123	0.37874	267	0	-0.1605
Hdgfrp3	7	0.10376	0.2941	235	5	-0.53694	0.94651	0.94649	684	0	-0.53694
Prdm11	9	0.10479	0.3222	236	6	-0.097348	0.6932	0.6918	505	0	-0.097348
Phf7	7	0.10554	0.29722	237	4	-0.10569	0.67707	0.67676	495	0	-0.10569
Elp3	6	0.10561	0.29212	238	2	-0.53694	0.8456	0.84492	605	0	-0.53694
Fbxw7	11	0.10784	0.35044	239	8	-0.091749	0.091325	0.091927	63	1	-0.091749
Trdmt1	11	0.10816	0.3513	240	5	0.48585	0.69616	0.69701	507	0	0.48585
Cbx3	4	0.10969	0.25107	241	3	-0.53694	0.90025	0.90041	648	0	-0.53694
H2-DMb1	9	0.11018	0.33246	242	5	-0.18763	0.77747	0.77658	562	0	-0.18763
Tdrd5	9	0.11062	0.33313	243	6	-0.37034	0.94465	0.9436	682	0	-0.37034
Phf14	9	0.11103	0.33386	244	4	0.35766	0.32425	0.32226	218	0	0.35766
Orc1	9	0.1113	0.33439	245	4	-0.063	0.76184	0.76089	552	0	-0.063
Mecp2	11	0.1123	0.36052	246	5	0.58632	0.52771	0.52768	375	0	0.58632
Smarcd2	9	0.11377	0.33901	247	4	0.0096966	0.4331	0.43078	312	0	0.0096966
Mbd3	10	0.1139	0.35078	248	5	0.1181	0.23049	0.23158	149	0	0.1181
Brca1	11	0.11439	0.36478	249	5	0.23848	0.28065	0.28034	187	0	0.23848
Lbr	10	0.11522	0.35326	250	5	-0.054837	0.82089	0.82175	593	0	-0.054837
Ing1	11	0.11599	0.36805	251	6	-0.29482	0.88651	0.88734	641	0	-0.29482
Hdac7	11	0.11679	0.36955	252	6	-0.15495	0.69724	0.69804	509	0	-0.15495
Ccl2	10	0.11808	0.35905	253	7	-0.32118	0.49987	0.50073	354	0	-0.32118
Jade3	6	0.11827	0.3134	254	4	-1.1047	0.31055	0.31027	210	0	-1.1047
Whsc1	10	0.12054	0.3643	255	5	-0.034191	0.8553	0.85532	614	0	-0.034191
Chd7	9	0.12064	0.35099	256	4	-0.36411	0.15415	0.1522	103	0	-0.36411
Stat6	9	0.12081	0.35128	257	4	-0.34521	0.55751	0.5561	398	0	-0.34521
Setd4	11	0.1217	0.37862	258	6	-0.35232	0.60821	0.6082	436	0	-0.35232
Nsd1	9	0.12197	0.35335	259	6	-0.60094	0.99205	0.99147	720	0	-0.60094
Socs6	10	0.12384	0.37093	260	7	-0.87744	0.77091	0.77172	556	0	-0.87744
Suv39h2	10	0.12422	0.37182	261	7	-0.35609	0.85581	0.85594	615	0	-0.35609
Mecom	9	0.12431	0.35738	262	4	0.05535	0.2143	0.21248	140	0	0.05535
Rae1	8	0.1244	0.35154	263	4	-0.52925	0.47189	0.47159	336	0	-0.52925
Men1	7	0.12487	0.33345	264	5	-0.50681	0.68963	0.68922	503	0	-0.50681
Dimt1	8	0.12488	0.35239	265	3	-0.002165	0.40513	0.40456	288	0	-0.002165
Brdt	10	0.12517	0.37389	266	4	0.25677	0.57405	0.57484	405	0	0.25677
Dpep1	11	0.12525	0.38504	267	7	-0.10668	0.30979	0.30896	209	0	-0.10668
Ptprc	5	0.127	0.30625	268	2	-0.12823	0.79295	0.7936	571	0	-0.12823
L3mbtl1	10	0.12912	0.38188	269	7	-0.50718	0.064345	0.065525	43	1	-0.50718
Cramp1l	10	0.12945	0.38258	270	3	0.20388	0.13714	0.13866	97	0	0.20388
Rpl32	3	0.12966	0.27336	271	2	-0.53694	0.088798	0.089166	62	0	-0.53694
Prdm1	11	0.13021	0.39378	272	4	0.44036	0.55069	0.55121	393	0	0.44036
Paxip1	9	0.1311	0.36968	273	6	-0.36854	0.41463	0.41179	299	0	-0.36854
Arnt	11	0.13139	0.39559	274	5	0.018896	0.11024	0.11045	80	0	0.018896
Asz1	7	0.13162	0.34581	275	3	-0.2501	0.86478	0.8655	622	0	-0.2501
Tet1	11	0.13303	0.39848	276	3	0.14228	0.80987	0.81057	585	0	0.14228
Kdm4a	9	0.13379	0.37438	277	5	-0.14677	0.63624	0.63459	468	0	-0.14677
Epc1	8	0.13429	0.37177	278	5	-0.4156	0.60606	0.60639	434	0	-0.4156
Cml1	9	0.13526	0.37686	279	5	-0.063	0.76257	0.76164	553	0	-0.063
Tcf3	10	0.13723	0.39787	280	7	-0.70247	0.67701	0.67773	494	0	-0.70247
Rpl23a	3	0.13775	0.28203	281	2	-0.53694	0.11685	0.1176	83	0	-0.53694
Npm1	6	0.13906	0.34503	282	3	-0.4106	0.7744	0.77339	559	0	-0.4106
Ctla4	9	0.14184	0.3884	283	5	-0.14422	0.67023	0.66813	489	0	-0.14422
Kdm5b	10	0.14206	0.40689	284	6	-0.11035	0.49359	0.49495	351	0	-0.11035
Plk1	2	0.14254	0.23453	285	2	-0.53694	0.85746	0.85588	618	0	-0.53694
Usp22	10	0.14257	0.40781	286	6	-0.1616	0.42143	0.42328	302	0	-0.1616
Nptxr	11	0.14263	0.41462	287	6	-0.11073	0.93981	0.94117	678	0	-0.11073
Cd276	9	0.14278	0.39008	288	6	-0.17971	0.24036	0.23801	160	0	-0.17971
Pygo1	10	0.14361	0.40969	289	5	-0.063	0.5693	0.56983	403	0	-0.063
Chd5	10	0.14361	0.40969	290	4	0.81767	0.42939	0.43078	309	0	0.81767
H2-Aa	9	0.14406	0.39227	291	5	-0.32361	0.33436	0.33235	230	0	-0.32361
Nat14	11	0.14674	0.42161	292	7	-0.31666	0.97142	0.97193	705	0	-0.31666
Setd7	10	0.14739	0.4172	293	7	-0.51293	0.97688	0.97694	711	0	-0.51293
Kdr	10	0.14876	0.41981	294	6	-0.36463	0.79797	0.7988	574	0	-0.36463
Jmjd1c	11	0.14961	0.42661	295	5	0.050523	0.38372	0.38242	272	0	0.050523
Dido1	11	0.15116	0.42903	296	7	-0.08422	0.43053	0.42976	311	0	-0.08422
Vegfc	9	0.15222	0.40611	297	4	0.13909	0.40146	0.39871	286	0	0.13909
Eif3a	7	0.15237	0.38212	298	4	-0.40467	0.87533	0.87604	632	0	-0.40467
Nap1l1	6	0.15238	0.36562	299	4	-0.36817	0.93892	0.93855	676	0	-0.36817
Jarid2	10	0.15267	0.42684	300	6	-0.35851	0.31361	0.31516	212	0	-0.35851
Dicer1	10	0.1538	0.4291	301	2	0.96399	0.039349	0.041874	32	1	0.96399
Smc1b	11	0.15433	0.43426	302	5	0.61401	0.17568	0.17471	117	0	0.61401
Kdm6a	10	0.15483	0.43093	303	5	-0.060363	0.8798	0.8796	637	0	-0.060363
Ube2v1	8	0.15551	0.40736	304	2	0.30202	0.48115	0.4809	344	0	0.30202
Flt1	10	0.15608	0.43292	305	5	-0.3868	0.84851	0.84883	607	0	-0.3868
Kat2a	11	0.1571	0.43905	306	7	-0.15598	0.53175	0.53206	379	0	-0.15598
Prmt8	8	0.15752	0.4101	307	3	0.079265	0.66522	0.66602	481	0	0.079265
Psmb10	10	0.15793	0.43614	308	5	-0.0042791	0.22355	0.2246	145	0	-0.0042791
H2-Eb1	10	0.15995	0.44004	309	6	-0.57333	0.79308	0.79395	572	0	-0.57333
Setd8	6	0.15999	0.37686	310	3	-0.53694	0.61459	0.61492	442	0	-0.53694
Nhs	11	0.16038	0.44444	311	5	0.027285	0.60478	0.60484	432	0	0.027285
Ncoa3	9	0.16084	0.42094	312	6	-0.52991	0.80756	0.80668	582	0	-0.52991
Psmd1	5	0.16096	0.36674	313	4	-0.53694	0.85662	0.85659	617	0	-0.53694
Nt5e	10	0.16231	0.44451	314	5	-0.021642	0.43027	0.43166	310	0	-0.021642
Tdrd7	10	0.16267	0.44517	315	5	-0.069934	0.3491	0.35044	245	0	-0.069934
Kmt2d	6	0.16295	0.38098	316	3	0.00087142	0.58296	0.58335	418	0	0.00087142
Whsc1l1	6	0.1636	0.38192	317	4	-0.53694	0.68413	0.68372	499	0	-0.53694
Dmtf1	10	0.16377	0.44711	318	4	0.11673	0.34013	0.34143	236	0	0.11673
Smarcc1	9	0.16532	0.42867	319	3	0.05535	0.049363	0.050602	38	1	0.05535
Mbtd1	9	0.16532	0.42867	320	3	0.15122	0.39813	0.39517	283	0	0.15122
Arid2	9	0.16762	0.4321	321	5	-0.59732	0.031669	0.032899	26	1	-0.59732
Brpf3	8	0.16973	0.42724	322	4	-0.52773	0.83982	0.83966	601	0	-0.52773
Kdm5c	10	0.17049	0.45933	323	5	-0.023022	0.63584	0.63636	467	0	-0.023022
Supt5	4	0.17057	0.34165	324	3	-0.43894	0.80903	0.81064	584	0	-0.43894
Eed	10	0.17097	0.46025	325	3	0.67582	0.44716	0.44799	323	0	0.67582
Adora2a	11	0.17128	0.4624	326	6	-0.26741	0.52852	0.52867	376	0	-0.26741
Chmp1b	5	0.17151	0.38505	327	1	0.5065	0.65765	0.65828	476	0	0.5065
Ing2	9	0.17357	0.44163	328	4	-0.063	0.18417	0.18291	121	0	-0.063
Kat5	7	0.17364	0.41891	329	3	-0.53694	0.67004	0.67013	487	0	-0.53694
Phc3	9	0.17445	0.44316	330	6	-0.30145	0.61207	0.61015	439	0	-0.30145
Il17a	9	0.17648	0.44671	331	4	0.3381	0.91095	0.90924	657	0	0.3381
Psmb9	9	0.1772	0.44778	332	5	-0.24317	0.59479	0.59274	425	0	-0.24317
Nap1l3	10	0.17789	0.47018	333	6	-0.042925	0.019495	0.022587	17	1	-0.042925
Brwd1	8	0.17836	0.43917	334	2	0.43598	0.29931	0.29974	204	0	0.43598
Yeats4	7	0.17971	0.42894	335	3	-0.37349	0.83819	0.83872	600	0	-0.37349
Uty	10	0.18198	0.47571	336	6	-0.2424	0.77322	0.77411	558	0	-0.2424
Areg	9	0.18229	0.45554	337	5	-0.24039	0.96012	0.95964	693	0	-0.24039
Myb	9	0.18308	0.45706	338	3	0.9898	0.18963	0.18846	124	0	0.9898
Scmh1	9	0.18572	0.46125	339	4	0.04663	0.91396	0.91245	661	0	0.04663
Stat2	10	0.18662	0.48197	340	4	0.12264	0.80875	0.80968	583	0	0.12264
Irf4	10	0.187	0.48243	341	3	0.54328	0.11651	0.11727	82	0	0.54328
Gm8909	10	0.18815	0.48399	342	6	-0.53694	0.57675	0.57761	408	0	-0.53694
Rela	9	0.18864	0.4659	343	5	-0.35566	0.62761	0.62571	458	0	-0.35566
Tdrd3	10	0.18875	0.48481	344	5	0.13427	0.36476	0.36601	249	0	0.13427
Gars	9	0.18909	0.46655	345	2	0.59794	0.80312	0.80244	580	0	0.59794
Hspbap1	8	0.1896	0.45516	346	5	-0.30235	0.5137	0.51341	360	0	-0.30235
Ino80	6	0.18997	0.41962	347	4	-0.53694	0.60502	0.60521	433	0	-0.53694
Rpl7a	6	0.18997	0.41962	348	3	-0.074057	0.62475	0.62488	455	0	-0.074057
Gm11127	9	0.19019	0.46842	349	6	-0.23424	0.79891	0.7985	576	0	-0.23424
Zfp57	10	0.19165	0.4887	350	5	0.22145	0.59777	0.59854	427	0	0.22145
Il10	9	0.19166	0.47069	351	6	-0.32324	0.8236	0.82247	594	0	-0.32324
Dot1l	11	0.19271	0.49592	352	7	-0.31319	0.37227	0.37106	258	0	-0.31319
L3mbtl4	5	0.19274	0.41758	353	3	-0.36154	0.61691	0.61776	446	0	-0.36154
Phf11a	6	0.19277	0.42371	354	4	-0.64401	0.84852	0.84785	608	0	-0.64401
Gatad2a	11	0.1931	0.49649	355	6	-0.011181	0.86385	0.86529	621	0	-0.011181
Ccl17	9	0.19334	0.47323	356	4	0.10066	0.52472	0.52259	371	0	0.10066
Tada2a	8	0.19393	0.46135	357	2	0.095832	0.40735	0.40671	290	0	0.095832
Senp3	11	0.19408	0.49798	358	7	-0.063607	0.89476	0.89552	645	0	-0.063607
Nat9	8	0.19445	0.46225	359	4	-0.20787	0.50115	0.50112	356	0	-0.20787
Hmg20b	11	0.19467	0.49893	360	6	-0.27729	0.7247	0.72543	534	0	-0.27729
Arnt2	6	0.19484	0.42634	361	3	0.13769	0.44896	0.44932	325	0	0.13769
Il13	9	0.19505	0.47595	362	5	-0.11523	0.80142	0.80083	577	0	-0.11523
Mybl2	5	0.19811	0.42356	363	2	-0.53694	0.3432	0.34593	239	0	-0.53694
Myc	5	0.20037	0.42593	364	3	-0.53694	0.49873	0.50042	353	0	-0.53694
Smad7	10	0.20055	0.50026	365	3	0.30587	0.70094	0.70213	513	0	0.30587
Tdrd9	11	0.20182	0.51001	366	6	-0.12416	0.094259	0.094708	65	1	-0.12416
Prdm6	9	0.20259	0.48752	367	5	-0.53694	0.57621	0.57432	406	0	-0.53694
Pmp22	9	0.20291	0.48803	368	6	-0.48945	0.97084	0.97045	702	0	-0.48945
Pdcd1lg2	11	0.20403	0.51329	369	6	-0.19455	0.47897	0.47849	342	0	-0.19455
Epas1	11	0.20404	0.5133	370	7	-0.080315	0.29361	0.29271	197	0	-0.080315
Yeats2	9	0.20454	0.49046	371	4	-0.25631	0.34838	0.34663	243	0	-0.25631
Taf12	6	0.2053	0.44049	372	4	-0.53694	0.41374	0.41391	298	0	-0.53694
Jmjd6	8	0.20588	0.47765	373	3	-0.063	0.46788	0.46778	334	0	-0.063
Ing5	11	0.20627	0.51653	374	6	-0.029323	0.45593	0.45494	330	0	-0.029323
Arid1a	10	0.20885	0.5118	375	6	-0.59744	0.34214	0.34324	237	0	-0.59744
Tgfb3	9	0.20974	0.49837	376	2	0.70724	0.69957	0.69838	512	0	0.70724
Ptger2	10	0.21029	0.51375	377	6	-0.17098	0.2487	0.24997	166	0	-0.17098
Supt4a	4	0.21106	0.39912	378	3	-0.47056	0.89573	0.8958	646	0	-0.47056
Il12a	7	0.21184	0.48003	379	2	0.47845	0.011669	0.013622	13	1	0.47845
Glyr1	9	0.2119	0.50161	380	6	-0.53694	0.99522	0.99513	724	0	-0.53694
Gmeb2	7	0.21305	0.48187	381	5	-0.53694	0.63803	0.63811	471	0	-0.53694
Sfmbt2	9	0.21372	0.50434	382	5	-0.17284	0.89587	0.89402	647	0	-0.17284
Vhl	6	0.21405	0.45248	383	4	-0.53694	0.4603	0.46147	332	0	-0.53694
H2-Ob	8	0.21641	0.49144	384	4	-0.46697	0.29503	0.29556	199	0	-0.46697
Satb1	10	0.21657	0.52235	385	5	0.13285	0.12945	0.1306	89	0	0.13285
Gfi1b	9	0.21875	0.51187	386	5	-0.011895	0.92452	0.92307	664	0	-0.011895
Taf5l	11	0.21953	0.53611	387	7	-0.10453	0.11742	0.11725	84	0	-0.10453
Sirt3	11	0.22021	0.5371	388	7	-0.10517	0.59361	0.59379	424	0	-0.10517
Msl3	6	0.22076	0.46152	389	2	0.060893	0.032335	0.032156	28	1	0.060893
Brd9	9	0.22168	0.51622	390	3	0.078598	0.23003	0.22803	147	0	0.078598
Ido2	8	0.22275	0.50009	391	5	-0.42533	0.90704	0.90624	654	0	-0.42533
Il6	8	0.22287	0.50022	392	5	-0.37656	0.11863	0.11958	87	0	-0.37656
Tdrd1	11	0.22291	0.54121	393	6	-0.5902	0.23168	0.23073	151	0	-0.5902
Eif3b	8	0.22301	0.50035	394	5	-0.47554	0.21397	0.21478	139	0	-0.47554
Zcwpw1	10	0.22335	0.53135	395	5	-0.0073265	0.28182	0.28332	188	0	-0.0073265
Map3k7	4	0.22626	0.42001	396	2	-0.53694	0.73646	0.73581	541	0	-0.53694
Cxcl12	9	0.22692	0.52432	397	4	0.25622	0.61824	0.6162	447	0	0.25622
Aurkc	8	0.22718	0.50525	398	3	0.57449	0.27064	0.27137	182	0	0.57449
Prdm10	10	0.22937	0.53867	399	5	-0.30008	0.65587	0.65637	475	0	-0.30008
Brca2	9	0.22973	0.52851	400	3	0.24006	0.60004	0.59811	428	0	0.24006
Gsg2	6	0.23005	0.47424	401	4	-0.53694	0.87517	0.87449	631	0	-0.53694
Mbd2	8	0.23082	0.5104	402	5	-0.32345	0.7882	0.78824	568	0	-0.32345
Naa60	6	0.23138	0.47623	403	3	-0.39694	0.68279	0.68251	497	0	-0.39694
Cbx4	10	0.23149	0.54146	404	5	-0.20062	0.69499	0.69582	506	0	-0.20062
Adora2b	9	0.23625	0.53814	405	4	0.6822	0.36652	0.36403	252	0	0.6822
Smarce1	8	0.23635	0.5177	406	3	0.11684	0.48833	0.48839	350	0	0.11684
Chmp4c	9	0.23714	0.53943	407	5	-0.53694	0.56726	0.56537	402	0	-0.53694
Npcd	6	0.23869	0.48621	408	3	0.32152	0.16295	0.16162	109	0	0.32152
Chrac1	7	0.24193	0.51871	409	4	-0.53694	0.43462	0.43332	313	0	-0.53694
Hmgn3	7	0.24316	0.52014	410	2	0.14692	0.51686	0.51581	363	0	0.14692
Atrx	8	0.24368	0.52699	411	3	-0.53694	0.20162	0.20243	133	0	-0.53694
Cd74	9	0.24383	0.54921	412	6	-0.067494	0.10312	0.10219	73	0	-0.067494
Il2	8	0.24551	0.5292	413	3	0.098408	0.63307	0.63384	462	0	0.098408
Control	675	0.24688	0.57658	414	337	-0.049	0.38705	0.38564	277	6	-0.049
Hdgfl1	10	0.2474	0.56161	415	6	-0.071735	0.82027	0.82124	591	0	-0.071735
Eif6	9	0.24944	0.55697	416	3	0.0536	0.50121	0.49915	357	0	0.0536
Prdm9	10	0.25001	0.5648	417	4	0.45169	0.37438	0.37614	262	0	0.45169
Ttf1	8	0.25226	0.53787	418	4	-0.32891	0.41139	0.4109	294	0	-0.32891
Phc1	8	0.25315	0.53887	419	4	-0.23996	0.54474	0.54452	389	0	-0.23996
Gm7030	9	0.25361	0.56303	420	3	0.39679	0.036754	0.03752	30	1	0.39679
Slc38a1	9	0.25506	0.56453	421	5	-0.10262	0.96108	0.96071	694	0	-0.10262
Smchd1	8	0.25661	0.54308	422	3	0.029431	0.14439	0.1453	100	0	0.029431
Ube2i	8	0.25773	0.54462	423	3	-0.13456	0.32493	0.325	219	0	-0.13456
Kmt2e	6	0.25968	0.51356	424	3	0.01323	0.68313	0.6828	498	0	0.01323
Tada3	10	0.26048	0.57743	425	6	-0.53694	0.52691	0.52802	374	0	-0.53694
Mael	10	0.26311	0.58068	426	4	0.016863	0.10339	0.10417	74	0	0.016863
Nat6	8	0.26501	0.55374	427	3	0.079639	0.50274	0.50255	358	0	0.079639
Kmt2a	6	0.26511	0.52038	428	2	0.30278	0.48592	0.48684	348	0	0.30278
Cxcr4	10	0.26645	0.58476	429	6	-0.24625	0.046352	0.048603	34	1	-0.24625
Brd4	6	0.26849	0.52442	430	2	-0.53694	0.40784	0.40754	291	0	-0.53694
Chd6	9	0.27204	0.58237	431	5	-0.1968	0.42353	0.42147	304	0	-0.1968
Alg13	9	0.27243	0.58274	432	3	0.93321	0.3093	0.30756	208	0	0.93321
Cd4	10	0.27412	0.59426	433	5	0.010462	0.8501	0.85037	610	0	0.010462
Prdm15	11	0.27612	0.61635	434	6	-0.28559	0.57779	0.57794	411	0	-0.28559
Mta1	10	0.27923	0.60035	435	4	0.11039	0.9806	0.98073	713	0	0.11039
Cdyl2	9	0.28047	0.59082	436	5	-0.033987	0.93309	0.93171	671	0	-0.033987
Sirt4	11	0.28127	0.62156	437	6	-0.28653	0.97084	0.97135	703	0	-0.28653
Brpf1	10	0.2829	0.60459	438	4	0.078517	0.17343	0.17462	116	0	0.078517
Tcf20	11	0.28332	0.62362	439	6	-0.23192	0.23042	0.22941	148	0	-0.23192
Cdc73	7	0.28827	0.56696	440	2	0.68613	0.094357	0.093995	66	0	0.68613
Crebbp	8	0.289	0.58295	441	4	-0.069097	0.38334	0.38284	271	0	-0.069097
Dnajc1	9	0.29131	0.60184	442	3	0.10787	0.82078	0.81967	592	0	0.10787
Ado	10	0.29167	0.61479	443	6	-0.41725	0.96328	0.9629	695	0	-0.41725
Jun	8	0.29202	0.5866	444	5	-0.2292	0.85141	0.85134	612	0	-0.2292
Ash2l	4	0.2932	0.50675	445	3	-0.53694	0.030245	0.030484	24	1	-0.53694
Alkbh2	9	0.29447	0.60496	446	4	0.38835	0.37262	0.37043	259	0	0.38835
Fto	10	0.29517	0.61859	447	5	-0.20597	0.61291	0.61336	440	0	-0.20597
Nap1l4	8	0.29589	0.59125	448	3	0.0018738	0.60709	0.60735	435	0	0.0018738
Tnfrsf4	9	0.29693	0.60749	449	5	-0.12426	0.8914	0.88947	644	0	-0.12426
Pgls	11	0.29909	0.63864	450	6	-0.33457	0.95808	0.95875	691	0	-0.33457
Smad2	8	0.30146	0.5981	451	5	-0.47223	0.31788	0.31824	215	0	-0.47223
Ube2b	6	0.30347	0.56849	452	2	-0.53694	0.63731	0.63725	469	0	-0.53694
Stat5b	10	0.30419	0.629	453	4	0.37717	0.43985	0.44073	320	0	0.37717
Pygo2	10	0.30421	0.62903	454	3	0.9562	0.61631	0.61673	445	0	0.9562
Egfr	11	0.30501	0.64453	455	5	0.05535	0.70841	0.70907	518	0	0.05535
Chmp5	5	0.30516	0.53716	456	3	-0.53694	0.95233	0.95252	687	0	-0.53694
Ido1	9	0.30532	0.6157	457	4	-0.08386	0.31494	0.31297	213	0	-0.08386
Wnk1	7	0.30706	0.58531	458	3	-0.53694	0.29209	0.29183	196	0	-0.53694
Cd28	11	0.30953	0.64905	459	6	-0.16704	0.70367	0.70428	516	0	-0.16704
Cd27	6	0.30991	0.57678	460	3	0.22149	0.46551	0.4668	333	0	0.22149
Slc26a1	11	0.31016	0.64949	461	3	0.43416	0.20867	0.20793	136	0	0.43416
Hltf	5	0.31064	0.54316	462	3	-0.53694	0.030578	0.030345	25	1	-0.53694
Rbx1	5	0.31114	0.54369	463	3	-0.53694	0.18211	0.18084	120	0	-0.53694
Aurka	3	0.31677	0.46855	464	2	-0.53694	0.13245	0.13293	92	0	-0.53694
Csf3	9	0.31899	0.62956	465	5	-0.037993	0.97095	0.97052	704	0	-0.037993
Phf11d	3	0.31959	0.47155	466	2	-0.53694	0.023201	0.022963	19	1	-0.53694
2410016O06Rik	8	0.32132	0.62129	467	5	-0.45918	0.77115	0.77129	557	0	-0.45918
Nelfa	5	0.32265	0.55548	468	1	0.54348	0.53613	0.53717	382	0	0.54348
Tdo2	10	0.32373	0.65079	469	5	0.034232	0.95661	0.95588	689	0	0.034232
Baz1a	10	0.32597	0.65328	470	2	0.46402	0.52431	0.5252	369	0	0.46402
Vegfb	9	0.32687	0.63724	471	5	-0.21221	0.79284	0.79246	570	0	-0.21221
Piwil2	10	0.32801	0.65586	472	4	0.18593	0.69648	0.69737	508	0	0.18593
Kdm3b	11	0.32814	0.66701	473	4	0.24694	0.62954	0.62955	459	0	0.24694
Mllt6	10	0.33004	0.65791	474	5	0.084686	0.57134	0.57199	404	0	0.084686
Hdgf	10	0.33114	0.65911	475	6	-0.22651	0.10602	0.10706	75	0	-0.22651
Dpep2	10	0.33511	0.66339	476	4	0.05535	0.28398	0.28536	190	0	0.05535
Mfge8	11	0.33516	0.67371	477	5	0.22022	0.25653	0.25589	171	0	0.22022
H2-Bl	6	0.33519	0.6073	478	3	-0.14412	0.96458	0.96522	698	0	-0.14412
Chmp2a	6	0.33581	0.60798	479	2	-0.53694	0.42788	0.42822	307	0	-0.53694
Slc25a15	10	0.34017	0.66914	480	3	0.088501	0.26543	0.26689	177	0	0.088501
Setdb1	8	0.34061	0.64269	481	4	-0.24827	0.8371	0.83699	598	0	-0.24827
Mr1	8	0.3417	0.64399	482	3	-0.19191	0.2976	0.2982	202	0	-0.19191
Clock	7	0.34721	0.62546	483	3	-0.40382	0.21267	0.21177	138	0	-0.40382
Vegfa	11	0.34853	0.68611	484	6	-0.16393	0.4286	0.4279	308	0	-0.16393
Gm10094	5	0.34865	0.58229	485	1	0.31703	0.79826	0.79863	575	0	0.31703
Dnajc2	9	0.34981	0.65926	486	3	0.55146	0.58589	0.58398	419	0	0.55146
Fxyd1	9	0.35289	0.66219	487	5	-0.22877	0.36126	0.35935	247	0	-0.22877
Noc4l	3	0.35388	0.50634	488	2	-0.53694	0.81594	0.8165	590	0	-0.53694
L3mbtl2	9	0.35453	0.66384	489	5	-0.24808	0.55815	0.55663	399	0	-0.24808
Rcc1	4	0.35701	0.56361	490	2	-0.44642	0.17661	0.17707	118	0	-0.44642
Deaf1	9	0.36082	0.6697	491	4	0.044639	0.68012	0.6782	496	0	0.044639
Sap18	4	0.36305	0.56804	492	2	-0.53694	0.68933	0.68811	502	0	-0.53694
Mbd1	9	0.36652	0.67446	493	2	0.56221	0.54138	0.53962	387	0	0.56221
Rcor3	5	0.36703	0.60107	494	2	-0.14734	0.63547	0.63584	466	0	-0.14734
Hdgfrp2	10	0.36749	0.6993	495	6	-0.31579	0.73627	0.73658	540	0	-0.31579
Nfkb1	10	0.36759	0.69938	496	5	-0.01424	0.2829	0.28443	189	0	-0.01424
Psmb8	10	0.37396	0.70575	497	5	0.15767	0.0323	0.035066	27	1	0.15767
Rere	9	0.3741	0.68159	498	3	0.13727	0.38379	0.38126	273	0	0.13727
Hdac8	8	0.37636	0.67692	499	4	-0.16642	0.13724	0.13802	98	0	-0.16642
Ing4	6	0.37816	0.64204	500	3	-0.27868	0.56164	0.56255	400	0	-0.27868
Hdac9	10	0.37879	0.70989	501	3	0.1487	0.55122	0.55156	394	0	0.1487
Setd3	8	0.37911	0.67903	502	4	-0.53694	0.99013	0.98993	719	0	-0.53694
Alkbh1	10	0.37974	0.71056	503	3	0.29895	0.18925	0.18984	123	0	0.29895
Prmt7	9	0.38021	0.68735	504	4	0.05826	0.76	0.75915	551	0	0.05826
Ccl5	9	0.38034	0.68748	505	5	-0.032013	0.33254	0.33059	228	0	-0.032013
Phf19	10	0.38152	0.71181	506	4	0.10593	0.32699	0.32852	223	0	0.10593
Jmjd4	8	0.38191	0.68115	507	3	0.10593	0.71177	0.71142	521	0	0.10593
Cbx2	7	0.38194	0.65853	508	3	-0.022566	0.95983	0.9603	692	0	-0.022566
Foxp3	10	0.38228	0.71235	509	5	0.27588	0.3881	0.39003	279	0	0.27588
Nap1l2	8	0.3841	0.68285	510	3	0.083328	0.63501	0.63587	465	0	0.083328
Pbrm1	7	0.38561	0.66197	511	3	-0.19287	0.63201	0.63199	460	0	-0.19287
Proc	9	0.38642	0.69284	512	5	-0.3934	0.87468	0.87312	630	0	-0.3934
Flt4	11	0.38703	0.72017	513	5	0.068962	0.4687	0.46793	335	0	0.068962
Sin3b	9	0.38935	0.69548	514	3	0.32992	0.44796	0.44559	324	0	0.32992
Kmt2c	6	0.39511	0.65501	515	3	-0.012537	0.2845	0.28412	191	0	-0.012537
Prdm5	6	0.39601	0.65552	516	3	-0.53694	0.37046	0.37045	256	0	-0.53694
Bahcc1	10	0.40025	0.72528	517	4	0.05535	0.96343	0.96308	696	0	0.05535
L3mbtl3	9	0.40382	0.70915	518	5	-0.033538	0.4774	0.47519	341	0	-0.033538
Sp110	7	0.4059	0.68032	519	4	-0.19427	0.87863	0.87948	635	0	-0.19427
Aire	8	0.40736	0.70048	520	3	0.05535	0.43973	0.43982	319	0	0.05535
H2-Q4	9	0.40903	0.71406	521	4	-0.2408	0.28923	0.28722	193	0	-0.2408
Rcor1	8	0.41098	0.70321	522	4	-0.53694	0.70861	0.70851	519	0	-0.53694
Vtcn1	10	0.41151	0.73335	523	4	0.4916	0.43551	0.43684	315	0	0.4916
Suv420h1	5	0.41194	0.64454	524	1	0.84652	0.51934	0.5211	367	0	0.84652
Trim66	10	0.41276	0.73424	525	5	0.13596	0.98745	0.98749	717	0	0.13596
Prdm8	9	0.41313	0.71774	526	4	-0.53694	0.4737	0.47173	337	0	-0.53694
Mmp9	11	0.41497	0.74439	527	5	0.079111	0.21769	0.21665	141	0	0.079111
H2-Q1	9	0.41871	0.7228	528	3	0.46772	0.37779	0.37541	264	0	0.46772
Ccnt1	9	0.42005	0.72406	529	3	0.0097747	0.37435	0.37211	260	0	0.0097747
Ciita	9	0.42103	0.725	530	5	-0.52885	0.079027	0.07839	53	1	-0.52885
Ehmt2	10	0.42232	0.74128	531	4	0.41976	0.60917	0.60948	437	0	0.41976
Hyal1	11	0.4228	0.75123	532	5	0.46484	0.10735	0.10758	76	0	0.46484
Smarcd1	9	0.4232	0.72675	533	4	0.11416	0.73292	0.73161	538	0	0.11416
Jade1	6	0.42426	0.67611	534	3	-0.11309	0.26511	0.2648	176	0	-0.11309
Fos	9	0.42561	0.72872	535	5	-0.30712	0.23934	0.2371	159	0	-0.30712
Smad3	11	0.4272	0.75491	536	6	-0.38303	0.9775	0.97804	712	0	-0.38303
Smyd1	10	0.42939	0.74623	537	5	0.084247	0.61538	0.6159	443	0	0.084247
Ubr7	10	0.43059	0.74723	538	5	0.36171	0.61968	0.61995	450	0	0.36171
Supt7l	8	0.43136	0.71905	539	4	-0.098324	0.077103	0.076905	51	1	-0.098324
Polr2b	6	0.43277	0.68219	540	3	-0.53694	0.25764	0.25743	172	0	-0.53694
Mtf2	10	0.43508	0.75037	541	4	0.50059	0.6323	0.63286	461	0	0.50059
Phrf1	10	0.43567	0.75082	542	5	-0.14135	0.86279	0.86272	620	0	-0.14135
Brd2	5	0.43988	0.67055	543	2	0.25905	0.29666	0.29848	201	0	0.25905
Gm6251	6	0.44012	0.68764	544	3	0.27389	0.34692	0.34675	242	0	0.27389
Uhrf1	7	0.44034	0.71078	545	3	-0.53694	0.71749	0.71756	527	0	-0.53694
Ltbr	10	0.44164	0.75494	546	4	0.38053	0.0021832	0.0042799	6	1	0.38053
Smarca5	8	0.45017	0.73257	547	1	0.46078	0.43762	0.43747	317	0	0.46078
Trerf1	6	0.45166	0.69634	548	3	0.0004048	0.095201	0.09451	67	0	0.0004048
Ezh2	9	0.45412	0.75335	549	1	0.81944	0.20793	0.20616	134	0	0.81944
Smarcd3	9	0.45437	0.75357	550	5	-0.17038	0.70181	0.70045	514	0	-0.17038
Csf2	10	0.4553	0.76474	551	5	-0.067437	0.20123	0.20193	132	0	-0.067437
Cecr2	8	0.45698	0.737	552	4	-0.49901	0.55431	0.55414	396	0	-0.49901
Dmap1	5	0.45717	0.68618	553	2	-0.53694	0.25561	0.25581	170	0	-0.53694
Ereg	9	0.45738	0.75619	554	4	0.29315	0.11023	0.10943	79	0	0.29315
Adora1	11	0.45961	0.78114	555	5	0.24908	0.083954	0.084762	58	1	0.24908
Terf2	8	0.46405	0.74213	556	2	0.10593	0.61978	0.62022	451	0	0.10593
Ube2e1	10	0.46609	0.77239	557	3	0.62391	0.67224	0.67282	491	0	0.62391
Map2k1	9	0.46687	0.76395	558	5	-0.077243	0.43704	0.43458	316	0	-0.077243
Rbbp4	7	0.4703	0.73827	559	3	-0.53694	0.41074	0.41033	293	0	-0.53694
Gzmn	9	0.47073	0.76731	560	2	1.133	0.27556	0.27374	185	0	1.133
Phf20l1	9	0.47252	0.7688	561	4	0.022923	0.87175	0.8702	627	0	0.022923
Tyw5	5	0.47393	0.70162	562	3	-0.25817	0.87067	0.87059	626	0	-0.25817
C920025E04Rik	4	0.47473	0.65072	563	2	-0.25965	0.12349	0.12403	88	0	-0.25965
Kdm1a	11	0.47676	0.79498	564	5	0.27987	0.72171	0.72261	532	0	0.27987
Satb2	10	0.47849	0.78077	565	4	0.45785	0.4433	0.44407	322	0	0.45785
Kdm1b	11	0.4797	0.79706	566	6	-0.13734	0.24544	0.24491	164	0	-0.13734
Hdac2	7	0.48019	0.74706	567	2	0.11986	0.07736	0.076816	52	0	0.11986
Sp100	7	0.482	0.74852	568	4	-0.23119	0.62547	0.62514	456	0	-0.23119
Phf3	10	0.48222	0.7833	569	5	-0.035805	0.72554	0.72617	535	0	-0.035805
Suds3	6	0.48282	0.71929	570	3	-0.53694	0.09198	0.091017	64	0	-0.53694
Kdm3a	8	0.48377	0.7555	571	3	-0.34663	0.56285	0.56225	401	0	-0.34663
G2e3	7	0.48455	0.75087	572	4	-0.53694	0.90355	0.90421	649	0	-0.53694
Rnf20	7	0.48713	0.753	573	2	-0.53694	0.15529	0.1544	105	0	-0.53694
Mier2	10	0.48866	0.78731	574	5	-0.53694	0.17954	0.18047	119	0	-0.53694
Mllt3	6	0.48885	0.7233	575	3	0.055571	0.33019	0.32981	226	0	0.055571
Pwwp2b	8	0.49433	0.76337	576	4	-0.23029	0.39919	0.39874	284	0	-0.23029
Mybl1	11	0.49447	0.80807	577	5	0.099875	0.24046	0.2397	161	0	0.099875
Prdm4	10	0.4953	0.7914	578	5	0.21007	0.13586	0.13734	95	0	0.21007
Phip	9	0.49695	0.78795	579	2	0.4567	0.53677	0.53492	383	0	0.4567
Chaf1a	4	0.50022	0.67005	580	2	-0.53694	0.28808	0.28602	192	0	-0.53694
Setd2	9	0.50122	0.79094	581	3	0.020001	0.93056	0.92903	670	0	0.020001
Btg3	6	0.5051	0.73475	582	3	-0.049452	0.016925	0.017214	16	1	-0.049452
Smndc1	3	0.5067	0.65626	583	1	-0.53694	0.048368	0.047584	37	0	-0.53694
Smad1	11	0.50943	0.81759	584	5	0.0939	0.53094	0.53113	377	0	0.0939
Gtf3c4	6	0.5114	0.73906	585	3	-0.53694	0.58148	0.58201	415	0	-0.53694
Pml	11	0.5122	0.81924	586	3	0.091652	0.85118	0.8524	611	0	0.091652
Rb1	11	0.51252	0.81947	587	5	0.16326	0.024561	0.028683	20	1	0.16326
Havcr2	9	0.52174	0.80221	588	4	0.13357	0.90497	0.90285	650	0	0.13357
Chd1l	10	0.52434	0.81111	589	4	0.52449	0.51755	0.51889	365	0	0.52449
Dnmt1	6	0.53024	0.753	590	3	-0.53694	0.66703	0.66681	484	0	-0.53694
Sirt2	10	0.53064	0.81537	591	5	-0.059099	0.53903	0.53971	385	0	-0.059099
Kdm5d	11	0.53094	0.8295	592	5	0.14136	0.45131	0.45051	326	0	0.14136
Taf8	7	0.53302	0.7818	593	2	0.29452	0.0025467	0.0043888	7	1	0.29452
Fbxl19	11	0.53431	0.83129	594	4	0.10317	0.77688	0.77784	561	0	0.10317
Phf1	10	0.53698	0.8194	595	4	0.073863	0.74019	0.74086	544	0	0.073863
Jak3	10	0.538	0.81998	596	4	0.016222	0.22471	0.22577	146	0	0.016222
Kif11	6	0.53873	0.75926	597	2	-0.20701	0.24112	0.24022	162	0	-0.20701
Padi4	10	0.54078	0.82175	598	5	-0.10934	0.84501	0.84564	604	0	-0.10934
Hells	8	0.54338	0.79756	599	3	-0.21967	0.93944	0.93847	677	0	-0.21967
Kat6b	6	0.54376	0.76277	600	2	0.49504	0.41542	0.41573	300	0	0.49504
Setmar	10	0.5509	0.82806	601	5	-0.1723	0.58803	0.58927	421	0	-0.1723
Prmt1	5	0.55129	0.75132	602	2	-0.53694	0.38675	0.38939	276	0	-0.53694
Smyd3	11	0.56027	0.84586	603	4	0.29452	0.85593	0.85732	616	0	0.29452
Ednrb	11	0.56442	0.8482	604	5	0.15656	0.87285	0.87394	628	0	0.15656
Ccl12	7	0.56462	0.79938	605	2	0.27113	0.53355	0.53305	381	0	0.27113
Tgfb1	11	0.56679	0.84941	606	4	0.14933	0.37437	0.37306	261	0	0.14933
Ring1	10	0.57144	0.8421	607	4	0.1609	0.53319	0.53395	380	0	0.1609
Chmp4b	6	0.57233	0.78378	608	2	-0.52614	0.8015	0.80016	578	0	-0.52614
Kdm4c	11	0.57396	0.85307	609	4	0.87535	0.63471	0.63469	464	0	0.87535
H2-Ab1	10	0.57574	0.84478	610	2	0.61504	0.33004	0.33139	225	0	0.61504
Nfkb2	11	0.57679	0.85469	611	5	0.10593	0.81023	0.81099	586	0	0.10593
Rbbp7	8	0.57847	0.82159	612	3	-0.063	0.23727	0.23811	155	0	-0.063
Nkx2-1	10	0.57876	0.84654	613	3	0.79492	0.24305	0.24423	163	0	0.79492
Sf3b3	6	0.58181	0.7907	614	3	-0.35744	0.36179	0.36198	248	0	-0.35744
Entpd1	10	0.58506	0.85057	615	5	0.018072	0.23279	0.2339	152	0	0.018072
Tada1	10	0.58984	0.85379	616	5	0.02005	9.48e-05	0.00031172	2	3	0.02005
Chaf1b	5	0.59051	0.77129	617	2	-0.53694	0.7095	0.71023	520	0	-0.53694
Ints12	8	0.59245	0.83182	618	2	0.14525	0.020215	0.020845	18	1	0.14525
Satl1	10	0.5939	0.85663	619	3	0.6227	0.29999	0.30144	205	0	0.6227
Nos2	11	0.5978	0.86535	620	4	0.14987	0.74017	0.74095	543	0	0.14987
Cbx5	8	0.61272	0.84533	621	2	0.7496	0.2662	0.2665	179	0	0.7496
Btla	8	0.61273	0.84534	622	4	-0.49715	0.23819	0.23881	157	0	-0.49715
Pick1	8	0.61576	0.84742	623	2	0.38486	0.41249	0.41195	297	0	0.38486
Hdac4	11	0.61807	0.87553	624	4	0.50267	0.34879	0.34788	244	0	0.50267
Apc	8	0.61827	0.84888	625	3	0.21705	0.039509	0.038915	33	1	0.21705
Smad4	9	0.61879	0.8546	626	4	0.12395	0.080245	0.079439	55	1	0.12395
Ccr4	10	0.61928	0.8708	627	5	0.051448	0.92835	0.92709	667	0	0.051448
Kir3dl2	8	0.61954	0.84973	628	4	0.0046015	0.62127	0.62172	453	0	0.0046015
Bmi1	8	0.62384	0.85243	629	3	0.53989	0.64194	0.64275	473	0	0.53989
Ube2n	3	0.62484	0.70898	630	1	-0.53694	0.19867	0.19836	129	0	-0.53694
Angpt2	9	0.63087	0.86078	631	4	0.076303	0.61601	0.61421	444	0	0.076303
Cbx7	7	0.63178	0.8355	632	2	0.38643	0.050378	0.050662	39	1	0.38643
Phf21a	11	0.63738	0.88498	633	5	0.11925	0.90635	0.90724	652	0	0.11925
Smarcb1	8	0.65063	0.86614	634	3	0.38282	0.0020998	0.0036268	5	2	0.38282
Meaf6	6	0.65447	0.84092	635	3	-0.44623	0.35666	0.35667	246	0	-0.44623
Suz12	6	0.6546	0.84101	636	1	-0.53694	0.38225	0.38226	270	0	-0.53694
H2-D1	9	0.66057	0.87625	637	1	0.48803	0.23315	0.23104	153	0	0.48803
Mgmt	11	0.66173	0.89681	638	3	0.84996	0.079505	0.08028	54	1	0.84996
Rpl9	1	0.66892	0.67127	639	0	-0.53694	0.33108	0.33119	227	0	-0.53694
Hmga1-rs1	7	0.67314	0.85804	640	2	0.26705	0.78066	0.78053	564	0	0.26705
Pcgf1	11	0.67833	0.90462	641	5	0.10593	0.2342	0.23309	154	0	0.10593
Icosl	10	0.67964	0.89547	642	2	0.51341	0.5258	0.5268	372	0	0.51341
H2-Q7	6	0.68122	0.8514	643	2	0.54483	0.68846	0.68806	501	0	0.54483
Kmt2b	5	0.68573	0.8228	644	1	0.46976	0.52298	0.52457	368	0	0.46976
Tap2	10	0.69197	0.90007	645	3	0.61119	4.02e-05	0.0001237	1	2	0.61119
Tnfsf9	11	0.69646	0.91339	646	5	0.49299	0.0055947	0.010841	9	1	0.49299
Kdm8	6	0.70473	0.86055	647	2	0.39547	0.74005	0.73854	542	0	0.39547
Kir3dl1	9	0.70636	0.89947	648	4	0.25447	0.66506	0.66283	480	0	0.25447
Cd274	11	0.70677	0.91806	649	4	0.36939	0.54288	0.54346	388	0	0.36939
Phf11c	3	0.71074	0.75448	650	1	-0.53694	0.25857	0.2577	174	0	-0.53694
Mier1	7	0.71174	0.87897	651	2	0.099736	0.13027	0.12991	90	0	0.099736
Brd3	11	0.71223	0.92089	652	4	0.50974	0.44195	0.44107	321	0	0.50974
Taf5	5	0.71408	0.83932	653	1	-0.53694	0.13062	0.12905	91	0	-0.53694
Phf23	6	0.71461	0.86446	654	1	0.15506	0.11117	0.11026	81	0	0.15506
Tnrc18	11	0.71819	0.92361	655	3	0.4458	0.32676	0.32641	222	0	0.4458
Huwe1	5	0.72306	0.8446	656	2	-0.53694	0.28001	0.28134	186	0	-0.53694
Mum1	10	0.72421	0.91356	657	4	0.10872	0.53098	0.53204	378	0	0.10872
Trim28	9	0.72666	0.90946	658	4	0.21013	0.038022	0.038856	31	1	0.21013
Atf7ip	9	0.72794	0.91028	659	2	0.34477	0.67023	0.66813	488	0	0.34477
H2-Q6	10	0.73449	0.91747	660	4	0.16128	0.92629	0.92506	665	0	0.16128
Ppargc1a	9	0.7389	0.91632	661	3	0.29315	0.67533	0.67327	493	0	0.29315
Setd1a	8	0.73986	0.90242	662	2	0.055981	0.8465	0.84624	606	0	0.055981
Prdm16	10	0.74534	0.922	663	3	0.42594	0.32495	0.32654	220	0	0.42594
Aurkb	4	0.75105	0.83457	664	1	-0.53694	0.48224	0.48072	346	0	-0.53694
Arg1	11	0.75106	0.93426	665	4	0.87675	0.37958	0.37851	266	0	0.87675
Rbbp5	9	0.77114	0.92779	666	2	0.47511	0.1359	0.13434	96	0	0.47511
Rel	8	0.77338	0.91694	667	1	0.24529	0.71334	0.71288	522	0	0.24529
H2-DMb2	10	0.77434	0.93353	668	4	0.14952	0.78225	0.78281	566	0	0.14952
Stat3	11	0.77508	0.94127	669	4	0.071918	0.39396	0.39285	282	0	0.071918
Smad6	11	0.77626	0.94163	670	4	0.48709	0.41201	0.41109	295	0	0.48709
Hdac11	10	0.78002	0.93581	671	4	0.11014	0.45691	0.45778	331	0	0.11014
Rcor2	9	0.78005	0.93047	672	1	0.27102	0.00015907	0.00034141	3	2	0.27102
Phf21b	10	0.79269	0.9411	673	3	0.3255	0.84904	0.84936	609	0	0.3255
Phb	4	0.79343	0.85131	674	1	-0.53064	0.67023	0.66888	490	0	-0.53064
Stat1	11	0.79841	0.94822	675	2	1.5917	0.029251	0.033037	22	1	1.5917
Asxl2	6	0.79898	0.90024	676	1	0.55947	0.34262	0.34277	238	0	0.55947
Supt3	4	0.80342	0.85523	677	1	-0.19797	0.58159	0.58116	416	0	-0.19797
H2-Oa	10	0.80641	0.94646	678	4	0.53297	0.72916	0.7298	536	0	0.53297
Rps17	2	0.81208	0.81085	679	0	-0.53694	0.30313	0.3021	206	0	-0.53694
Kalrn	9	0.81594	0.94118	680	3	0.36143	0.26665	0.26436	180	0	0.36143
Adora3	6	0.8181	0.90937	681	2	1.1501	0.25422	0.25362	169	0	1.1501
Taf9	1	0.83006	0.83082	682	0	-0.53694	0.16994	0.16991	111	0	-0.53694
Fbxo11	8	0.83727	0.9452	683	2	0.98139	0.056257	0.055322	42	1	0.98139
Smc2	5	0.8375	0.90794	684	1	-0.53694	0.66409	0.66444	479	0	-0.53694
Smarcc2	10	0.8392	0.95724	685	3	0.40173	0.27312	0.27489	184	0	0.40173
Arid4b	9	0.84153	0.94994	686	3	0.61066	0.54854	0.54671	392	0	0.61066
Prmt5	4	0.84244	0.8729	687	1	-0.53694	0.41049	0.40822	292	0	-0.53694
Rps19	5	0.84288	0.90943	688	1	0.29452	0.57861	0.58002	413	0	0.29452
Rnf40	9	0.84305	0.9505	689	3	0.16526	0.02656	0.028515	21	1	0.16526
Jmjd7	10	0.84478	0.95869	690	3	0.49499	0.36959	0.37083	255	0	0.49499
Suv420h2	8	0.85007	0.95047	691	2	0.32387	0.78999	0.79002	569	0	0.32387
Taf6l	9	0.85269	0.95403	692	3	0.24051	0.15528	0.15338	104	0	0.24051
Ccdc79	10	0.85708	0.96178	693	3	0.72094	0.082032	0.082249	56	1	0.72094
Rsf1	10	0.86174	0.96281	694	3	0.16663	0.23851	0.23968	158	0	0.16663
Tdrd6	10	0.86702	0.9642	695	3	0.48097	0.29363	0.29532	198	0	0.48097
Nat8l	9	0.88019	0.96382	696	2	0.36248	0.19936	0.19745	131	0	0.36248
Sirt7	9	0.88093	0.96403	697	3	0.6173	0.10192	0.10126	72	0	0.6173
Zmynd11	10	0.8902	0.96993	698	2	0.58623	0.61907	0.61936	449	0	0.58623
Aanat	7	0.89159	0.95324	699	2	0.15379	0.13478	0.13442	94	0	0.15379
Cbx6	10	0.90555	0.97419	700	3	0.27568	0.007984	0.011316	11	1	0.27568
Smc1a	3	0.90943	0.90951	701	0	-0.53694	0.31065	0.30961	211	0	-0.53694
Tada2b	10	0.9096	0.97531	702	3	0.86441	0.32801	0.32954	224	0	0.86441
Hmgn5	9	0.91095	0.9747	703	2	0.38643	0.37521	0.37286	263	0	0.38643
Tap1	9	0.92274	0.97679	704	2	1.4725	0.087523	0.086702	61	0	1.4725
Kat6a	6	0.93562	0.95955	705	1	0.14709	0.085508	0.084663	60	0	0.14709
Supt6	4	0.93724	0.93669	706	1	0.17508	0.5453	0.54409	390	0	0.17508
Phc2	4	0.93761	0.93701	707	0	0.49466	0.0049442	0.0058237	8	1	0.49466
Zfp541	10	0.93909	0.98451	708	2	0.92739	0.065716	0.066792	44	1	0.92739
Mrgbp	3	0.94018	0.93991	709	0	0.4339	0.06727	0.066673	45	0	0.4339
Zzz3	10	0.94516	0.98651	710	3	0.28925	0.79624	0.79718	573	0	0.28925
Hdac1	8	0.94593	0.97774	711	2	0.77475	0.54824	0.5479	391	0	0.77475
Kdm7a	6	0.95448	0.96636	712	1	1.038	0.07409	0.073234	50	0	1.038
Elmsan1	6	0.95815	0.96795	713	1	1.1046	0.15234	0.15117	102	0	1.1046
Dnmt3l	8	0.96018	0.98374	714	2	0.90215	0.073839	0.073392	49	1	0.90215
Smn1	10	0.96927	0.9905	715	2	0.52181	0.23164	0.23275	150	0	0.52181
Ptger3	9	0.97118	0.98936	716	1	0.7941	0.43468	0.43234	314	0	0.7941
Sp140	4	0.9833	0.98283	717	0	-0.10189	0.47455	0.47293	338	0	-0.10189
Polr2d	5	0.98472	0.98464	718	0	0.1262	0.17214	0.17053	115	0	0.1262
Dpf2	6	0.98477	0.98498	719	0	0.10593	0.50031	0.50111	355	0	0.10593
Phf11b	5	0.98552	0.9854	720	0	0.37624	0.38379	0.38633	274	0	0.37624
Jak2	10	0.98561	0.99515	721	2	1.2725	0.0015181	0.0030034	4	2	1.2725
Brd8	7	0.99027	0.99045	722	1	0.13944	0.66647	0.66679	483	0	0.13944
Mbd4	9	0.99806	0.99785	723	0	0.69991	0.51032	0.50815	359	0	0.69991
B2m	10	0.99851	0.99847	724	1	1.4807	0.10997	0.11074	78	0	1.4807
Pcgf2	8	0.99865	0.99852	725	0	0.51216	0.73559	0.73515	539	0	0.51216
Jak1	11	0.9989	0.99912	726	1	1.6132	0.15666	0.1562	107	0	1.6132
Cxxc1	7	0.9996	0.99954	727	0	0.76415	0.36592	0.36568	251	0	0.76415
